# Supplementary material for: Investigation of Multilocus Imprinting Disturbance (MLID) in 101 Beckwith-Wiedemann Spectrum patients
Source: Research Square preprint supplement (doi:10.21203/rs.3.rs-6555801/v1), 2025-05-07
Supplement: Supplementary file 1 [file 05d9e115983ab31702dfabe4.xlsx]

## Sheet: bVals_gDMRs 3SD
Table S3: Z-scores for the probes located within the DMRs reported in Article X are shown. Probes with hypermethylation greater than +3 SD are highlighted in red, while those with hypomethylation below -3 SD are highlighted in blue.
	Patient 70	Patient 71	Patient 72	Patient 1	Patient 73	Patient 74	Patient 2	Patient 75	Patient 3	Patient 4	Patient 5	Patient 6	Patient 7	Patient 8	Patient 9	Patient 76	Patient 10	Patient 11	Patient 12	Patient 13	Patient 14	Patient 77	Patient 15	Patient 78	Patient 16	Patient 17	Patient 18	Patient 19	Patient 20	Patient 21	Patient 22	Patient 23	Patient 24	Patient 25	Patient 26	Patient 79	Patient 27	Patient 80	Patient 81	Patient 29	Patient 30	Patient 31	Patient 82	Patient 32	Patient 33	Patient 34	Patient 35	Patient 36	Patient 37
cg10243676	0.116207	1.00932	0.195648	1.53054	-2.7003	-3.75734	-0.228223	-3.37538	-2.01601	-0.200955	0.206955	0.634979	-0.384129	-0.332659	1.56755	-2.6481	-0.423153	-1.6924	0.290244	0.123163	-1.08195	-0.1304	-4.3437	1.78637	-0.0404451	-0.549418	-0.623315	-1.58486	0.282899	0.10631	1.44119	0.924462	1.18968	0.151702	-0.323573	-1.10437	-1.26658	-1.64932	-0.694085	3.67184	0.705246	0.298406	-2.92793	2.92179	0.180741	-0.194793	0.733696	-0.317415	2.42738
cg11704876	0.261621	0.74525	0.738274	1.63402	-2.87314	-4.48045	0.452044	-2.80138	-2.83071	0.159837	0.420653	0.456385	-0.389809	-0.134192	1.57414	-1.24157	-0.0591321	-1.35987	1.00271	-0.432941	-0.672094	-0.0885942	-5.5387	3.00852	0.651225	-1.03179	-1.223	-1.31319	-4.32281	0.237342	2.59465	1.36279	2.17214	0.254172	-0.338942	-1.30842	-3.21422	-0.776722	-1.23044	2.84801	0.57899	-0.319577	-3.72197	2.31273	2.68565	-2.18511	0.347821	-0.259115	1.50019
cg22862450	-0.538362	1.52696	-1.12764	1.0421	-0.613065	-2.15964	1.00054	-3.68484	-2.87087	-1.37582	0.852497	-0.946047	-0.783788	-1.20469	1.4818	-2.48131	-1.09936	-0.529406	0.190873	-0.203158	-0.682868	-0.0308677	-7.59945	1.06376	0.536255	-1.4829	-1.04052	-1.27919	-6.69735	-0.652743	1.74776	0.0605201	1.93513	-0.881671	0.0288943	-1.25745	0.66081	-0.859535	-1.12919	1.5324	1.25675	0.191532	-3.5588	2.16927	-0.643257	1.73835	0.879628	-0.264023	1.06193
cg15057250	-0.224653	1.39572	-0.281321	2.06501	-2.36248	-3.22896	-0.612557	-4.06046	-3.73898	-0.879397	0.171581	0.303276	-0.42507	-0.995056	0.466761	-3.05817	-2.26257	-1.71817	0.780703	-1.21711	-1.04089	-0.2883	-7.94518	1.97061	0.726863	-1.14905	-1.34733	-1.47687	-7.21225	-0.393147	2.38115	0.489613	1.29576	0.461238	-1.71923	-0.888422	0.708957	-1.46916	-1.77539	1.64834	0.402676	0.432243	-5.19004	1.89676	-0.671444	1.12392	0.948932	-0.183497	1.36162
cg03641225	2.23872	-0.372548	-0.601544	-0.478402	-2.47004	-3.69862	0.28018	-0.812988	-1.59198	0.0134445	-0.97859	0.773012	0.404189	-0.869681	0.245191	-0.429139	-2.41948	-1.31191	-1.26988	1.05203	-3.07766	-1.02955	-0.193058	-3.12779	-0.169576	0.825541	-0.556213	-1.22201	-3.94646	1.58238	1.17955	0.312509	0.330966	0.140463	0.244407	-2.555	-0.19614	0.0607827	-1.47089	-4.32494	-0.395697	-2.08186	-2.76761	-1.11872	-0.538151	0.45767	0.787626	-0.765227	0.244224
cg24871743	4.87464	0.0274013	-0.760916	3.96292	-1.32246	-2.41447	-0.787636	-1.12061	-3.24279	-1.21193	-0.657547	0.976442	-0.535129	-1.20253	0.386996	-1.06554	-0.862711	-2.63356	-0.437854	0.565451	-4.73385	-1.07151	1.3641	-5.5484	0.286067	-1.51195	-0.94754	-0.341755	0.415153	-0.810377	1.53214	0.0701154	1.35718	0.417038	1.03512	-5.04438	1.80415	2.17369	-3.3888	-1.39803	-1.25865	-1.10386	-2.33945	-2.00496	-0.314963	2.33904	-1.0247	-1.99787	-0.210776
cg22901840	3.83343	0.48382	-0.383411	3.3062	-2.23642	-1.79616	-1.28227	-1.99172	-1.86791	-0.506873	-1.16803	0.0796419	0.266483	-0.499204	0.405206	-0.129425	-1.16071	-1.29963	-1.02051	1.2361	-4.78499	-1.57195	0.364911	-4.44427	0.240459	-0.126121	-0.822027	-0.556986	3.32666	0.0564394	1.32187	0.407833	0.655725	0.441354	0.513749	-4.20065	1.41869	0.76069	-3.20922	1.47826	0.282989	-0.780668	-2.4837	-1.69682	-1.11607	1.39807	-0.261585	-1.70419	0.252444
cg20149168	4.43614	0.212545	-0.807891	2.97354	-1.11991	-2.64932	-1.81859	-2.56241	-3.44616	-0.90757	-1.67561	1.05577	-0.500553	-0.485641	0.631943	-0.773169	-0.00241026	-1.44374	-1.31855	0.667066	-5.91833	-1.23512	0.296013	-4.78949	0.0831646	0.200592	-1.71597	0.145312	1.94507	-0.5721	0.884124	0.45071	1.70265	0.929638	0.203297	-3.83278	2.30398	0.0545816	-2.86485	0.288692	-0.413314	-1.45154	-3.34098	-3.47877	-1.33517	1.07645	0.0975703	-2.1235	-0.804069
cg13697378	5.1941	-0.562539	0.19661	4.07903	-6.98406	-3.66377	-1.61713	-3.37661	-3.68086	1.09586	-2.20793	1.4646	1.01753	-0.596714	-0.164007	-1.4324	-2.5958	-0.783579	-0.808569	1.63413	-8.39802	-1.8735	0.472789	-10.2098	-0.553242	0.744502	-1.37775	-0.408694	-7.2711	-0.866714	2.18223	-0.342123	-0.0833581	-0.336555	-0.0238612	-7.20244	1.1141	-1.50665	-3.62245	-0.611905	0.642908	-3.17177	-9.56054	-3.84204	-0.615444	0.698312	0.624266	-2.01159	1.13668
cg00448707	4.75703	-1.05966	0.173388	2.33582	-3.85704	-3.15851	-1.02281	-2.42633	-3.66929	-0.15402	-1.94798	0.340057	0.483001	-0.812585	0.38226	-0.893726	-2.33958	-0.258036	-1.21609	0.936503	-6.5229	-1.04398	0.834266	-6.69348	-0.313631	-0.527899	-1.27992	-1.51084	-3.28204	-0.52126	1.15803	-0.0781447	0.634707	1.17843	-0.903478	-5.38602	0.783345	-1.20855	-3.55264	-1.98862	-0.948941	-1.59026	-5.33708	-4.44257	-2.02481	1.83333	0.132173	-2.09563	0.00632859
cg09118625	5.33317	-0.00879238	-1.0055	4.82478	-3.61039	-4.00203	-1.5447	-2.22949	-3.49442	-0.208779	-1.67752	2.44212	-0.170303	-0.412458	-0.141607	-0.202537	-1.47712	-0.890208	-1.42636	1.95771	-7.42802	-1.89569	1.36306	-6.90979	0.50781	0.457583	-1.27385	0.125677	4.03848	0.478166	1.13035	-0.0569003	0.0257692	1.21201	1.11807	-6.70798	2.64381	-0.492549	-4.60624	1.70876	0.451683	-2.27307	-5.70058	-3.02707	-0.206882	-0.0597213	0.183591	-1.5326	-0.150802
cg21808053	2.56483	-0.41948	-1.20021	1.47156	-3.96396	-2.17551	-1.46777	-1.31759	-3.14295	-0.134684	-0.545241	0.0995334	0.303963	-1.66084	-0.340618	-0.256835	-1.34195	-1.48752	-2.00728	0.184702	-4.76912	-1.36159	-0.066173	-4.90195	-0.30911	0.822046	0.426502	-1.05759	-6.0828	0.0950332	0.618321	-0.246267	1.32772	-0.362053	-0.425717	-4.52716	2.0061	0.101844	-2.62908	-3.63848	0.702342	-1.62117	-4.22046	-2.91179	-0.73743	3.21814	0.112171	-1.7205	0.843975
cg02317907	0.152029	-0.15762	-1.90858	-1.98396	-3.19533	1.63079	0.836987	-5.88772	-2.05498	-0.648365	-2.03727	-3.00084	-2.18596	-0.772979	0.941088	0.255461	-0.122519	-1.56287	-2.58571	0.0672325	-1.14011	-1.60276	-0.15558	-0.940941	-1.9277	-1.46668	-1.48461	-0.748075	2.1779	-1.84803	-1.15948	0.647218	-0.0286118	0.917206	2.50536	-1.48859	1.34539	1.57531	-2.02324	-1.78651	0.408625	0.975269	-7.67126	-0.623112	-1.12098	-1.36544	-0.622811	-2.63031	0.880126
cg17943391	-0.803347	-0.366971	-2.09819	-2.63416	-7.62343	-1.87723	-1.01043	-11.0678	-0.431354	-1.13081	-1.66496	-0.947569	0.19271	0.996292	-0.892478	0.0697638	-2.00744	-0.931913	-1.49744	0.793414	-2.03241	-2.14176	0.00217047	-1.34486	-1.28949	0.490061	1.60558	-0.694426	2.82749	1.08294	-0.436532	-0.815777	0.970619	-0.613357	0.867689	-1.01899	-2.68778	0.900225	-3.80241	-1.94381	-0.204723	-0.059353	-11.1035	-0.72207	-1.7431	-0.025479	-0.257733	-0.0384994	0.697004
cg19114595	-2.01517	0.683383	-1.5568	-3.2945	-0.600012	1.96844	0.907737	-4.86695	-0.957117	-0.341455	0.718492	-2.13622	1.25473	0.204255	1.13058	2.38435	-1.67514	-0.530414	-2.57153	1.48058	-2.03708	-1.65631	-0.939324	0.654241	-2.24037	-0.757091	-0.812392	-1.62814	5.52969	0.717106	-0.980672	0.0507831	1.44252	-0.609311	-0.107871	-0.372067	-0.295876	0.73909	-1.88995	-1.62882	0.925867	-0.598302	-2.8198	1.63697	-2.49866	0.135045	0.51063	-0.143568	1.30311
cg12070746	-0.151138	0.148496	-0.734173	-1.02248	-5.02654	-1.67903	-1.0702	-7.12409	-0.154693	-0.938238	-1.60471	0.0396779	0.134896	-0.149593	-0.687939	-0.442745	-1.0111	-0.539442	-0.0888624	0.493185	-1.99467	-0.97078	-1.28998	-1.36011	-1.11639	0.380608	0.277242	-0.668495	5.09544	0.558432	0.0870652	-0.0848825	1.00106	-0.311442	-0.0628785	-0.905284	-1.2233	0.975099	-2.41637	-2.96531	-0.202021	0.115566	-7.28724	-1.19307	-2.25571	0.852832	0.0875264	-0.0156222	0.0235427
cg16314899	-1.26106	-0.105865	0.788325	0.908576	-4.85682	0.692218	-1.04915	-6.6898	-1.37276	-0.955493	-1.97203	-0.173402	-0.05593	-0.275267	1.181	-0.0747064	0.468033	-0.933914	-1.68514	0.341718	-2.51206	-1.59749	-0.548164	-1.76206	-0.917242	0.399982	-0.0863769	-0.459041	3.03159	1.15558	0.884878	-0.63188	1.46047	0.180716	0.500117	-1.08656	-0.376534	0.017145	-2.76833	-0.126655	0.0740211	-3.29367	-7.2414	0.410916	-0.250585	-2.20207	1.0442	-0.557816	0.0793341
cg25755905	-0.534644	0.116473	-0.755569	-1.60403	-4.54371	-1.20053	-1.45172	-5.919	0.0196621	-0.428785	-1.23665	-0.281447	0.198989	0.0099604	-0.0984526	0.0581625	-1.10283	-1.41977	-0.59348	0.311644	-1.77014	-1.66259	-0.865424	-1.18894	-1.23272	0.0775516	0.212891	-0.754412	4.36689	0.259533	0.138011	0.207515	1.57167	-0.181384	0.194952	-0.851054	-1.17179	1.34582	-2.17453	-3.15653	-0.366143	-0.83441	-6.7738	-1.21327	-2.41642	1.08962	0.31581	0.0621505	0.267258
cg22500004	-0.926478	-0.16743	-1.76486	-1.69166	-6.26312	-2.0027	-2.18985	-9.23533	-0.722002	-1.16297	-2.32336	-0.154616	-0.727594	-0.276122	-0.383322	-0.271191	-1.93419	-2.50979	-1.26345	-0.015193	-3.57746	-1.01578	-0.540401	-1.20285	-1.11747	-0.864817	-0.149345	-0.853799	4.02764	-0.037721	-0.347431	-0.132917	1.23542	-0.309339	-0.82393	-0.663752	-1.82721	0.851409	-3.29327	-3.76344	0.654239	-0.00263655	-9.56889	-2.15125	-3.3902	-0.119339	-0.12804	0.376767	-0.346439
cg05949203	-0.0289796	0.443975	0.00454705	0.13641	-7.47737	0.327085	-1.61314	-10.21	-1.05326	-1.27315	-2.74996	0.599174	0.0577802	-0.382065	0.625538	0.431149	-0.708301	-0.82482	-1.3249	0.0177158	-2.65702	-1.27044	-2.452	-0.254747	-1.14057	-1.30784	-0.231922	-0.0903897	-1.285	0.475439	0.313625	-2.17696	0.910537	1.05377	0.989574	-1.07327	-1.59869	0.125828	-3.37	-1.85867	1.8149	-2.29597	-11.1945	-0.677307	-1.86462	-0.525936	0.189249	-1.23977	0.579791
cg19694923	0.711136	0.263169	-0.370304	-1.11657	-6.02641	-2.06132	-1.00019	-7.43798	-0.205958	0.10012	-1.21873	0.336336	0.233385	0.0349449	0.740878	-0.0548769	-1.10073	-0.402163	0.901056	0.662268	-1.87138	-1.16387	-0.540985	-0.878564	-0.7829	-0.220583	0.360576	0.213954	3.3462	1.23094	0.607149	-0.755539	2.15573	-0.609007	0.799886	-0.781198	-1.8111	0.799457	-1.66176	-2.5044	0.402476	0.466371	-8.01816	-1.5265	-2.54397	0.824991	0.239995	0.389849	0.278404
cg05392265	0.151805	0.0146954	-0.695395	-0.912788	-3.76416	-1.45227	-0.94854	-5.24447	-0.311986	0.0543029	-1.20902	-0.554272	0.0996267	-0.395144	0.532371	-0.261516	-2.23589	-1.25451	-0.75794	0.08405	-1.83222	-1.64925	-0.648522	-0.363809	-0.274342	-0.21276	-0.202089	-0.30975	2.81124	0.369496	0.070157	-0.219404	1.48089	0.0857315	-0.0935391	-1.18238	-1.22804	0.805971	-1.5325	-2.25969	0.0476322	0.217508	-5.06597	-0.90489	-3.3244	1.59656	-0.619053	-0.247954	-1.90208
cg06191076	-0.525978	0.297748	-1.01899	-0.696655	-5.77643	-2.15115	-0.452795	-6.76851	-0.406918	-0.144462	-1.55527	-0.65161	-0.388478	0.0769156	0.0744685	-0.402834	-1.67077	-0.792253	1.02018	0.302391	-2.18833	-1.64559	-1.11328	-0.150566	-1.65415	-0.13395	-0.822069	0.0391734	2.80718	-0.0765915	0.407993	-0.507865	0.93824	0.265663	0.206316	-1.83507	-0.583119	1.01458	-1.82455	-2.25538	-0.351013	-0.21745	-6.49696	-1.06183	-4.8199	1.36146	-0.662646	-0.394751	-2.8868
cg16148270	-1.52718	1.06089	-0.270423	1.10068	-9.25123	2.61815	-1.54983	-12.4611	-1.13117	-0.170122	-3.65872	1.13824	4.93837	-0.0140651	0.280368	1.02959	0.457061	-0.377944	-1.12719	0.566108	-3.14573	-1.25837	-1.9854	-2.09673	0.149821	0.729224	1.97853	0.97526	-1.33618	0.370086	-0.705452	-1.57656	0.246968	3.65829	1.75947	-0.336231	-0.164363	-0.654152	-4.35484	0.494628	1.17171	-2.41028	-15.038	2.0333	-1.12584	0.919305	-1.03426	-1.87263	0.416282
cg13208159	-0.633698	-0.427377	-1.08639	-0.952754	-3.65581	0.190755	-1.67527	-4.6817	0.0902987	-0.610084	-1.60933	-0.0492938	-0.648697	-0.69419	-0.168708	-0.992784	-1.10715	-1.48635	-0.882292	-0.320547	-2.25139	-1.51737	-1.40632	-0.753363	-0.387025	-0.892308	-0.853338	-0.966245	0.244025	0.687235	-0.117437	0.0349276	2.09751	-0.0902262	-0.457954	-1.15495	-3.16217	1.0532	-2.22266	-1.16068	-0.713877	-0.463587	-4.54938	-0.239597	-2.517	1.65918	-0.788282	-0.855972	-1.06723
cg13099417	-1.88981	-1.1612	-0.827128	-1.54795	-3.17581	-3.10589	-2.29994	-1.74018	-0.434858	0.297594	-0.539477	-1.86264	-0.568261	-0.542673	-0.358045	-0.990916	-1.41923	-2.62275	-3.12779	0.970064	-0.47602	-0.0141797	1.50923	0.809781	-1.83818	-2.04061	0.90535	0.498023	-2.89237	-1.09016	-0.309785	-0.773021	0.675675	1.3764	-1.86058	-1.15893	-2.29619	-0.600601	-0.530026	0.0405766	0.806287	-0.664288	-2.51554	-2.2428	-4.17412	1.78859	-0.983618	-1.2295	-2.00739
cg27545611	1.10519	1.70618	-0.507329	0.369533	-6.28046	-5.36231	0.437533	-7.52326	-1.91641	-1.98281	-5.04489	1.18732	-1.14928	0.424702	0.132882	-2.9259	-1.50205	-0.470705	0.503315	0.517761	-3.06997	-1.69982	-0.656531	-3.28464	-1.56697	0.212907	0.341732	-1.19342	1.83507	0.31108	-0.294744	-1.24645	1.00269	1.44028	1.00886	-1.03462	-0.79644	-1.44214	-3.12945	-1.36015	-0.796499	-4.56441	-8.85195	-2.20578	-1.50504	-1.25105	-1.18137	-3.271	-2.45693
cg16148134	-0.913776	1.28749	-1.1993	-2.78669	-4.72383	-4.43674	-0.475571	-5.61958	-3.12606	-2.55707	-1.9051	0.412149	0.683744	-1.43964	1.34873	-1.43773	-0.813017	0.110031	-0.316024	0.695449	-5.18085	-2.83942	0.0757466	-4.12114	0.0447227	-0.202196	-0.0242523	-1.96645	-2.03563	-3.17763	1.072	-1.93606	0.897578	-0.0454211	0.0333118	-2.5606	-2.12742	-1.78706	-2.60704	-1.04227	1.18267	-2.45805	-5.77663	-1.66591	-2.45439	-0.49264	0.933289	-0.395485	-0.686522
cg13605615	0.966895	0.644938	-0.237787	-2.58136	-5.33522	-5.22483	-0.687555	-8.19931	-2.80346	-3.02287	-1.3825	1.64113	0.397114	-2.43459	0.599667	-0.997057	-1.68041	-1.08998	-1.33946	1.98713	-5.85759	-2.73308	-2.64782	-2.74977	0.131098	-0.301781	-0.731616	-1.41555	-6.70282	-1.91385	1.13879	-1.86619	0.565107	-0.397814	0.728007	-2.9215	-1.46876	-1.29853	-2.22962	-0.244314	0.408605	-3.66132	-8.15074	-1.49687	-3.83496	-0.520081	0.559101	-0.825872	-1.78122
cg10038185	1.60593	-0.145481	-0.479713	-0.958317	-4.21255	-4.68702	0.800265	-6.22044	-1.04736	-0.45946	-2.22246	1.63281	0.594648	-0.7005	0.627639	-0.626455	0.925022	-0.269253	-0.0129619	1.23084	-5.8906	-2.11656	-2.74251	-3.55193	0.546033	0.41882	0.285897	-0.956347	-4.92408	0.853754	0.422353	-1.1527	0.930621	-0.437356	-0.238452	-2.66827	2.28223	-1.32942	-1.85884	-0.667817	1.45944	-1.0731	-7.04009	-1.70128	-0.825598	-0.145897	0.252259	-0.410576	-0.754545
cg19696983	1.56544	1.31086	-1.01881	0.71828	-0.890859	-1.38911	0.88062	-0.158019	-0.131417	0.991449	0.595907	0.898851	-0.371699	0.986982	1.43833	0.391754	0.247779	0.940717	-1.07819	0.97851	-1.23721	1.08916	0.574615	0.293	0.417232	0.195481	-0.717904	0.0361789	0.170434	-0.914317	0.379564	-1.75839	-0.753932	-0.32376	-0.991645	0.69683	-0.811355	0.402031	0.746478	-0.54379	1.52476	0.835963	0.666578	0.152445	0.678273	-5.30287	-1.09643	0.51126	0.415845
cg23239484	0.385865	1.66514	1.83871	-0.947114	-0.452755	0.910086	0.289714	1.3702	0.241403	0.684673	1.60049	0.663183	0.992811	1.95807	1.39957	0.421638	0.136335	1.10259	-0.916342	0.931247	1.87157	-1.36302	0.521229	0.860638	0.635741	1.47871	1.49044	1.71184	0.682396	-0.681927	0.687576	0.325747	-0.274152	1.44489	1.20353	-0.145919	-1.08897	0.339092	0.732894	-3.17407	1.04302	0.279716	0.32219	-0.897435	-1.43137	-0.852387	0.62123	0.870182	0.287182
cg13443116	0.278929	0.815158	-0.076156	-0.583088	0.470918	-0.0824436	1.39865	0.526905	0.0535322	0.123015	0.767217	1.19219	0.392187	0.780636	0.813569	1.06263	0.833606	0.150143	0.170274	0.621393	0.606131	0.492659	0.041479	0.739585	-1.97172	-1.32217	0.586173	-0.0903562	0.577574	0.700351	-0.492331	-0.121702	-0.112607	0.781664	0.363759	0.292994	-2.05738	-0.962601	-0.231507	0.754524	0.287976	0.483277	0.506588	0.707017	-2.71925	-4.96906	0.834629	0.462079	-0.0861084
cg25535070	-0.153351	1.42657	-0.567047	1.04939	3.65352	2.4035	-0.0602565	-0.677668	0.097552	0.246561	4.24776	-0.0835778	0.784721	-0.699228	-0.839616	-0.369314	0.632446	-2.87768	0.0434505	0.119459	0.0541645	-1.1068	1.15141	2.23519	1.29494	-1.33136	-1.20509	-1.50329	-0.694653	2.19297	-0.631773	-1.09294	0.455104	-1.14973	-2.08788	-0.233754	-0.349541	0.346171	4.885	0.081089	-1.4782	1.43781	5.44688	2.12642	2.20269	-1.53434	0.369696	0.587529	-0.198535
cg04359324	-3.79829	-0.865866	0.221327	0.337013	2.72673	-1.87307	0.254552	0.796571	-0.820362	-0.942308	3.65377	-0.27986	1.44754	0.727866	0.493783	0.140853	-2.50203	-0.484402	-0.477913	-0.966253	-0.461799	0.0776734	1.15078	0.896263	-1.48541	-2.44685	-0.651315	1.05287	-5.21499	-0.0451755	0.72854	-1.4098	0.305137	-1.30994	0.683121	0.287068	-2.71499	-1.37886	4.01422	-1.38987	0.866083	0.380879	3.18111	-2.18809	-4.31442	-2.8215	0.200604	0.492922	-1.25077
cg20471298	-0.616913	0.690418	-1.56416	0.36614	6.32345	-1.43712	-1.06848	0.837539	-0.0909947	0.345714	6.85508	-0.455633	0.647403	0.493548	0.685614	0.892423	-3.05086	0.207727	-0.966821	-0.0856481	-0.531322	0.00794461	3.02247	5.24427	-0.715714	-0.754675	-0.988544	-0.44234	7.50295	-2.26478	-1.11488	1.1878	-0.179922	1.12245	0.871633	-0.659699	-2.65484	-0.302412	11.3895	-2.3991	0.631116	-2.62929	12.1166	-1.93979	1.77154	-0.277943	-1.08803	-0.120074	-2.19836
cg03428109	-0.668888	-0.236625	0.315447	1.06155	2.75635	-1.77671	-2.15706	-0.14148	-1.64138	-0.142314	3.59587	-1.15286	-0.060219	0.887375	0.22987	-2.04326	-0.088777	-1.92335	-0.232932	-0.608907	-1.32788	0.223191	0.548149	3.34898	-1.59353	-0.13514	-1.045	-0.360857	1.54496	-0.472846	0.189439	-1.66275	0.260912	0.960191	-0.56227	-1.07597	1.52087	0.924616	4.104	2.36186	-0.771763	-1.10427	4.30983	-0.978626	2.25101	0.902269	-2.13464	-2.05559	-1.24831
cg25307915	-0.212991	0.164689	-1.11815	0.593067	4.37488	3.05907	0.572924	0.814967	-0.777488	1.31502	4.76181	-0.23698	-0.278785	-1.44123	0.314919	-0.182856	-0.154294	-0.791668	-2.19507	-0.746949	-0.172099	-2.04187	2.92174	3.98778	-1.58069	-0.152349	-0.3502	-1.03255	-6.46498	0.462479	0.78828	-0.881474	1.01861	0.777008	-0.995627	-1.17492	-0.361584	-0.200043	5.79115	-1.59147	-0.711133	-1.5356	6.052	-0.866127	-1.87022	-3.5079	-0.794146	-0.808698	-1.01219
cg19366042	-0.391963	0.962251	0.378681	-0.327055	3.31799	3.26273	-0.0833885	2.90321	0.672849	2.47645	4.54387	0.5627	-0.585731	-0.885619	-0.786567	0.176335	1.33576	-0.327057	-0.333521	-1.26688	-2.83398	-1.54322	3.10284	0.73687	-2.42818	-1.4388	0.0952753	-0.518958	-1.90188	-0.769272	-0.658577	-1.41239	0.625458	1.40971	0.407749	2.88115	1.16405	-0.140302	4.72741	2.1864	0.0578616	0.467213	4.50918	-0.98041	-0.950233	-0.714996	0.491068	-0.673239	0.100878
cg10583266	-1.72738	0.485789	1.22596	-1.3978	1.66836	-1.64532	1.38583	2.67773	-1.76613	0.237317	3.81331	-0.519045	0.11512	0.9427	-1.48627	-0.113677	-1.10039	-0.0125528	-1.72901	1.35905	1.34733	-0.678861	2.31791	3.23564	-2.69446	-1.00552	-0.942084	1.431	-2.49022	-1.63591	0.8606	-0.672701	-0.141339	-0.680473	0.483647	-1.18151	-1.6622	0.530671	3.91346	-1.97478	0.440132	-1.57857	4.3964	-0.48975	-1.91626	-0.75257	-1.01736	-0.93071	-1.18153
cg18772071	-0.779595	-0.12327	0.237649	-0.57045	-7.29809	-2.47037	-0.24144	1.15445	0.0786904	1.17376	-0.653906	-2.46016	0.659204	0.317816	0.878575	-1.26794	-1.58764	-0.386442	-0.798872	0.662035	0.484445	-0.386574	-0.568293	1.02928	-0.519454	2.12394	0.449623	0.371084	5.2102	-0.585806	0.973221	0.856008	-0.38467	0.266924	0.650742	-8.47645	-2.38278	-2.88842	2.00807	-2.58239	0.309526	-1.44721	-8.25126	-0.229416	-6.3746	-1.80868	0.62954	1.07503	0.76964
cg17635114	-0.883684	1.03006	0.347427	-0.181443	-10.7474	-3.41294	-0.143016	0.834686	-1.52854	0.371258	0.710476	-1.32237	0.945972	0.665818	0.527902	-1.39454	-3.43022	-1.88525	-0.0931465	2.86913	0.925837	-1.96205	0.082089	2.32074	-1.62096	0.0465627	-1.47138	0.417131	2.18676	-4.80402	0.599649	0.915043	-0.0634156	-0.701592	1.71134	-13.1879	-3.84312	-1.23683	0.325892	-6.02147	0.819646	-0.291421	-13.2521	-5.39007	-8.03185	0.683468	-0.177101	-0.278093	-0.596792
cg05065100	-2.72305	0.569968	-0.100434	-1.6763	-4.76819	-3.6731	-1.52951	0.625825	-1.59817	-1.07894	-0.616145	-0.118163	-0.205849	-0.0300131	-0.747831	-1.03917	-2.26547	-1.13067	-2.44801	0.477061	-0.972957	-0.265239	-0.350792	2.04151	0.381399	-0.0155667	0.357292	-0.258274	-6.15924	-2.21513	-0.293554	-0.18244	1.02235	1.23255	-0.197687	-7.05855	-2.81417	0.298587	-0.607585	-3.98495	-1.02586	-2.01563	-7.02566	1.47793	-3.17559	-2.93128	-0.750086	-0.762361	0.176181
cg12759554	-1.10476	0.409465	0.384032	-0.992877	-5.39316	-1.71331	-1.04496	0.464262	-1.24043	-0.782672	-0.0313874	-0.611604	0.218621	-1.1369	-0.604253	0.17949	-2.4182	-2.48693	-2.00294	0.0511754	-0.888655	-2.07044	-0.722962	0.168966	-0.702337	0.0593858	-2.01534	-0.865699	4.32388	-2.08885	-0.089177	-0.0694248	0.374503	0.657028	-0.106915	-6.70812	-1.64987	-0.220088	0.62224	-3.98531	-0.69572	-1.59812	-6.04832	-1.98219	-4.52807	0.674332	-1.56194	-0.703043	-0.501421
cg01578057	-0.399648	-0.0800244	0.20946	-0.64067	-4.95473	-1.51793	-0.655383	0.303332	-1.20674	-0.358313	0.261909	-0.0369817	0.54246	-0.743527	-0.128304	-0.565524	-1.77391	-2.33853	-1.74198	0.386258	-0.331994	-2.15488	-0.907503	1.40349	-0.967571	-0.020674	-1.1568	-0.437965	3.0142	-1.89659	0.94748	0.774969	0.669453	0.498921	0.486893	-5.73276	-1.02285	-0.563999	1.02389	-3.98687	0.392491	-1.05001	-6.25366	-2.16183	-3.66321	1.12857	-0.895294	-0.612943	-0.151514
cg27150681	-1.98233	0.610801	0.110994	-3.2918	-9.36728	-3.19321	0.197009	0.639429	-1.85217	-0.755171	-0.705646	-1.30318	0.0423762	-0.348901	0.993016	-0.645202	-3.95248	-3.41641	-1.99523	-0.690351	-0.286989	0.124708	0.194846	-0.419837	0.348897	-0.660903	0.388104	-0.11669	3.9062	-1.04951	0.22147	0.297249	1.87227	-0.476535	-1.31339	-13.9615	-2.22081	-1.16779	-0.818559	-5.65832	-0.0788766	-2.1078	-13.0866	-2.37035	-2.95692	-2.22839	-1.75889	-1.11538	-0.576689
cg23954636	-0.440887	-0.499348	-0.252048	0.141809	-13.0029	-2.42008	-2.08988	-0.605106	-2.02336	0.802207	-0.713277	-1.45682	0.0305128	1.07156	-1.10767	-1.42834	-3.00777	-2.61284	-0.632993	0.737012	-0.612567	-1.40538	-1.52101	1.12173	0.239651	-1.39243	-0.467444	-0.141201	2.99113	-2.18877	0.327893	-0.403017	-0.415416	-0.149807	-0.11973	-15.4443	-0.521746	-0.882862	0.652819	-4.63385	-0.301897	-1.60521	-14.9939	-0.549637	-2.43616	-0.597754	-2.08648	0.671347	-0.495012
cg01174175	0.80736	0.136531	-0.439914	-0.0875811	-11.7352	-1.55856	0.654703	0.810973	0.612161	2.09156	0.609419	0.312161	0.727914	1.7644	0.93836	-0.551882	-0.292756	-2.65976	-1.72745	0.450372	-0.0522993	-1.6492	-1.92009	2.84196	1.94396	0.197855	-1.19621	-0.270095	-0.925119	-1.02567	1.73152	0.846923	-0.334914	0.658879	0.522706	-16.1478	1.68841	-0.235602	0.89084	-2.82408	-0.663823	-1.58962	-17.209	0.832876	-1.23178	-1.72922	-0.548385	-0.198816	0.454986
cg06617468	-0.369356	0.0156859	-0.512371	1.41142	-11.2099	-0.930161	-0.443978	0.38432	-0.418392	1.95164	-0.170556	0.278175	0.804148	0.889094	-0.385509	-0.438942	-0.789414	-1.6382	0.662662	1.3209	0.802793	-1.14768	-1.41792	4.3234	1.89105	-0.738913	-0.272126	0.110022	-0.477409	-1.75185	0.916326	0.421825	0.325454	-0.860197	0.569003	-16.9586	1.05565	-0.0493282	1.60122	-5.11622	1.57529	-2.05331	-16.1472	-0.76039	-3.78231	0.435327	-0.682697	0.127548	1.27683
cg18607468	-1.32832	0.496795	-0.163931	-3.26653	-5.99064	-2.57192	0.34556	0.0040999	-0.865909	0.7438	0.524433	-0.0408616	0.300476	0.377368	1.95789	-0.664663	-2.88138	-1.83839	-1.81313	0.497409	0.0359565	-0.57248	-2.75223	1.01625	0.193896	-0.485648	-0.0453621	-0.972221	4.48612	-2.3873	0.276867	0.325277	0.223094	0.465372	-0.560801	-9.57761	-2.44251	-1.4626	-0.135133	-6.08972	0.8168	-1.1722	-8.83517	-3.6196	-2.52543	-1.57571	-0.740421	0.147394	-1.02523
cg11300971	-1.22723	-0.0870452	-1.03036	-1.53664	-8.78477	-3.06498	-0.0923787	-0.299111	-1.43077	0.441982	-0.129365	-0.721505	-0.507939	0.27353	3.02295	-1.5445	-3.82002	-1.94093	-0.545115	0.469431	0.264983	-0.0473567	-0.10058	0.707983	0.727583	0.207759	-0.639676	-1.41979	3.89067	-1.57063	0.256253	-0.0970596	0.482689	-0.433052	0.428927	-11.9321	-2.1203	-0.673136	-0.000342947	-6.90966	-0.269343	-1.97984	-11.6059	-1.66732	-2.22373	-1.80751	-1.84945	-1.2786	-0.389654
cg13610072	-0.467304	-0.596549	0.1154	-0.840729	-8.03925	-1.23407	0.916521	-0.555776	-1.32045	0.701368	-0.0307715	-0.106454	0.0443051	1.22302	0.121604	-1.33539	-4.29668	-2.81885	-0.89526	1.56696	0.858183	-1.29826	0.415533	0.625356	1.94383	0.423165	-0.834511	-0.951019	1.41413	-3.0176	1.18065	-0.488727	1.09411	-0.498023	0.233949	-11.5336	-1.59549	0.451058	-1.4274	-6.93082	-0.303047	-2.16039	-11.707	-2.54151	-4.14706	-2.40353	-0.803751	0.0835315	-0.294661
cg07539802	-0.561004	0.517214	0.174622	-1.67038	-3.52368	1.26806	0.596181	0.20168	-0.827112	0.0150098	1.38369	-0.989988	-0.415124	-0.821308	0.679629	0.174132	0.501472	-2.31296	-3.09577	0.0946193	0.520871	-0.372755	-1.48551	-0.2787	-0.476163	-0.613067	0.0977275	-1.09287	-5.44419	-0.246403	-0.54558	-1.53659	0.0310155	0.0591207	0.507596	-3.72867	-2.52508	-0.462916	-0.939658	-1.8595	-0.443641	0.61395	-4.11343	-2.50892	-0.0927436	-1.27647	0.999631	-0.727039	-0.509903
cg11852404	0.942637	0.326617	0.953816	1.05748	-0.370254	0.414114	1.00098	-1.65376	0.741488	-0.434407	0.133991	1.33048	0.223976	1.36355	-2.02549	-0.420931	1.22595	0.927282	0.82656	0.405651	-0.87359	-1.60755	0.311235	0.181789	0.70215	0.659681	-1.08166	0.295265	-0.783335	1.74551	0.501282	-1.98364	1.01788	-0.0778498	0.778693	-0.000663936	-0.621317	-0.0177518	-1.64743	0.0728141	-0.121986	-0.397721	-0.0907385	-1.73285	0.655281	0.367074	0.719493	0.344299	-1.24286
cg16684184	2.38788	1.09812	0.789006	1.91008	0.366734	-1.75441	0.511217	-1.48093	-0.30374	0.447355	0.0588423	0.988679	0.0400453	1.75499	-1.41556	-1.10429	1.9747	-2.09898	-0.873455	0.214388	-0.639846	-0.739363	1.03028	-0.000175168	-1.19707	-0.401355	-2.71404	1.09954	-0.3333	2.21824	1.95163	-1.25844	0.643623	0.648429	-0.000439613	-0.624113	-0.872509	0.0604994	-1.67081	2.312	-1.29139	-0.26335	-0.524884	-0.898125	-0.606691	1.96338	-1.30119	-0.889287	-2.1679
cg00308130	0.957729	0.967164	1.00682	1.00271	-0.251434	-1.44558	0.568598	-1.30791	0.742257	-0.542379	-0.920901	0.608024	0.904919	1.37859	-1.66984	-0.240165	1.11213	0.981432	-0.12819	0.708941	0.129159	-0.845095	-0.355893	-0.909812	0.455671	0.391439	-1.60826	0.531265	-0.120599	1.49508	0.948684	-1.10458	0.266218	0.504943	0.809066	-0.234477	-0.316064	0.402407	-1.3193	1.65021	-0.346994	0.242209	-0.32267	-1.46952	0.221518	-0.939709	0.777356	-0.0310095	-1.54062
cg15837280	0.973482	0.827115	0.871535	0.225039	-0.862007	-1.53371	-0.550956	-1.16826	0.860501	-1.08523	-0.957992	0.750668	1.40877	1.33221	-1.41474	-0.201327	1.21113	1.18749	-0.824322	1.08768	-0.80898	-1.1497	-0.964783	-1.06839	0.284573	0.60842	-1.45291	-0.244604	-0.190329	2.13186	0.744715	-1.01085	-0.07798	0.838743	1.0859	0.201599	-1.11282	-0.0855305	-1.35618	1.34849	-1.15876	0.430026	-0.898463	-1.55537	-0.869909	-0.636821	1.55669	0.140965	-1.61224
cg07158503	0.551647	0.623397	0.129762	0.546718	0.589585	-1.45555	1.03243	0.123841	0.523397	-0.641971	0.811151	0.662971	0.671618	0.849599	-1.58876	0.745389	0.442094	0.283072	0.62083	0.90034	0.599677	-0.998813	0.244903	0.609351	0.858408	0.65362	-1.64879	0.513139	-0.715653	1.31428	0.466399	-1.68198	0.899307	0.862129	0.498558	0.40859	-1.64932	0.923018	-1.00882	-0.447445	0.675387	0.666344	0.748406	-1.65195	0.743386	0.64869	0.0438382	0.474095	-1.41278
cg04515200	-0.288032	0.316967	1.81713	0.410696	-0.179622	-1.47511	0.0701296	1.11664	0.309506	-0.624266	1.46164	0.30074	1.24385	0.547412	-1.10361	0.0343554	-0.183295	0.168162	0.408778	0.62858	0.61399	-1.35281	-0.0973147	1.16645	0.817525	0.0802455	-1.70482	0.861666	-1.48756	-0.197247	0.983033	-1.23337	1.48089	-0.0526496	0.336336	0.629662	-1.58802	1.3724	-1.04164	1.11311	0.572083	-0.460055	0.998636	-1.68329	-0.540248	0.412214	-0.96219	-0.409816	-1.74211
cg13581155	0.880381	0.889738	1.38697	0.18942	-0.725742	-1.30129	-0.500688	0.281014	-0.810557	-0.95478	0.843086	0.712881	2.09036	0.813055	-1.22945	0.760457	-0.694308	0.0785605	-0.837758	0.896159	0.226194	-0.793111	0.122471	2.16844	-0.26976	-0.386245	-1.459	1.00759	-0.683327	0.316102	0.296743	-1.39989	0.769203	0.474429	-0.0319183	0.260935	-0.843551	0.510633	-1.28572	-0.853785	0.231159	-0.377284	1.31738	-1.07111	-0.320776	0.413426	-0.86965	-0.32721	-1.25454
cg11608150	0.767627	0.73425	0.109251	0.551209	-0.541621	-1.48244	1.00118	-0.0707694	0.856786	-0.788497	0.645575	0.966821	0.75424	1.06456	-1.55842	0.990675	0.851836	0.379259	0.644858	1.13834	0.587115	-1.20186	0.656852	0.851401	0.855267	0.710059	-1.54027	0.701866	2.46721	1.52654	1.08591	-1.57765	1.23298	0.610416	0.673319	0.391172	-1.52687	0.646467	-1.51401	0.321769	0.254335	0.956474	1.06132	-1.49652	-0.169489	0.617509	0.115379	0.644139	-1.53352
cg06478886	-0.06327	0.562001	0.490837	0.215805	0.362167	-1.1497	0.689938	0.22409	0.672016	-0.877346	0.552984	0.923159	0.890985	0.638591	-1.82047	1.02627	0.799564	0.181231	0.246987	0.727226	0.570869	-1.34282	0.290569	0.931444	0.332709	0.522088	-1.48385	0.557803	2.40656	1.69601	1.19537	-1.95891	1.1882	0.753657	0.525491	0.349666	-0.844816	0.820257	-1.72452	-0.488813	1.24695	0.470472	0.837175	-1.68192	0.117658	0.0743232	-0.136905	0.528899	-1.82889
cg04481923	0.319908	0.618598	0.453733	-0.0386936	-0.0532428	-1.313	0.637339	-0.64672	0.465356	-1.13165	0.446035	0.97806	0.487456	0.851201	-1.46896	0.663401	0.674989	0.0653784	0.298188	0.702966	-0.133412	-1.13774	0.333552	-0.420148	0.451116	0.403907	-1.5343	0.280296	-1.29709	0.821881	0.468676	-1.42546	0.960746	0.625869	0.4592	0.1732	-1.57107	0.776013	-1.49699	0.714124	0.454216	0.190914	1.0252	-1.51957	0.449242	-0.0729296	0.448059	0.556049	-1.53853
cg18678645	0.593028	0.682839	0.632687	0.628142	-0.0051759	-1.53205	0.966492	-1.07636	0.775657	-0.939743	0.34385	0.583455	0.327375	0.933726	-1.49601	0.667128	0.605789	0.358863	0.671056	1.03876	-0.101704	-1.36068	0.377252	-0.160441	0.322937	0.406479	-1.48056	-0.0264076	-1.25146	1.39629	0.79366	-1.53899	0.76999	0.310488	0.575187	0.0480472	-1.45734	1.13641	-1.53826	0.612355	0.471209	0.205595	0.926248	-1.43254	0.844882	0.23501	0.178374	0.337242	-1.448
cg06536614	0.766929	0.602929	0.648511	0.762441	0.402055	-0.562314	0.644553	-0.459984	0.57565	-0.30924	0.544952	0.677383	0.744163	0.631407	-1.77845	0.634555	0.394459	0.710209	0.536286	0.700029	0.39336	-0.920675	0.432328	0.3659	0.63065	0.566595	-1.78371	0.345754	0.484341	0.765426	0.936659	-1.76487	0.629818	0.548719	0.671012	0.587857	-1.6993	0.596207	-1.77989	0.381946	0.56734	0.383531	0.656836	-1.72432	0.665751	0.555662	0.55668	0.486226	-1.77246
cg26328633	0.648553	0.718722	0.674877	0.629656	0.326267	-0.994127	0.860022	-0.652465	0.56885	-0.551494	0.397102	0.675395	0.606461	0.842754	-1.66985	0.623204	0.125543	0.861724	0.651595	0.703526	0.386284	-1.11809	0.461168	0.336992	0.683317	0.620361	-1.66175	0.261466	0.629487	0.870645	0.838379	-1.64599	0.456082	0.600987	0.601153	0.599369	-1.63775	0.479676	-1.66041	0.284902	0.642498	0.318999	0.800511	-1.65781	0.524565	0.386612	0.544263	0.503729	-1.59399
cg25340688	0.622828	0.524384	0.683512	0.342602	0.299804	-0.955635	0.61102	-0.754223	0.440056	-0.504135	0.463679	0.752463	0.773392	0.56979	-1.64442	0.598641	0.0763882	0.567086	0.535408	0.537679	0.222673	-1.07716	0.253774	0.198648	0.60444	0.63719	-1.64598	0.239021	0.591032	0.730655	0.774525	-1.66001	0.519493	0.639108	0.447633	0.408594	-1.65589	0.5758	-1.6378	0.118366	0.776301	0.523804	0.743763	-1.6599	0.673341	0.347955	0.535358	0.41891	-1.63682
cg26896946	0.601593	0.742673	0.877438	0.722179	0.388614	-0.969726	0.615926	-0.619362	0.486194	-0.551574	0.435894	0.747223	0.752942	0.614571	-1.67168	0.552418	0.138292	0.609527	0.599357	0.68391	0.289627	-0.974789	0.529465	0.192124	0.596801	0.565057	-1.70783	0.220092	0.595989	0.913277	0.784389	-1.70759	0.785663	0.673788	0.486965	0.568654	-1.72988	0.69179	-1.72274	0.316276	0.666374	0.433017	0.934784	-1.71691	0.850835	0.346952	0.612404	0.500539	-1.59327
cg00124993	0.49429	0.777758	0.876613	0.541918	0.254495	-1.00018	0.509519	-0.7479	0.452302	-0.738894	0.453755	0.642276	0.771506	0.686811	-1.66852	0.621265	0.0983753	0.625352	0.632291	0.837126	0.186108	-1.19143	0.643218	0.0940133	0.625014	0.576386	-1.67366	0.295938	0.477186	0.797192	0.839366	-1.65871	0.529085	0.582087	0.765365	0.457951	-1.63767	0.674092	-1.67255	0.197061	0.782272	0.338792	0.811679	-1.65519	0.624413	0.494782	0.807	0.605804	-1.63081
cg08745965	1.42666	0.601834	0.487038	0.694271	-0.0135091	-1.44572	0.260718	-1.00291	-0.0257041	-1.05339	0.259108	0.674977	0.711975	0.488247	-1.56245	0.708711	0.0123463	-0.180288	0.240785	1.46288	-0.0623969	-1.34936	0.298221	0.256446	0.504428	0.822965	-1.6686	-0.0661299	-0.187757	1.0289	0.932496	-1.53147	0.720424	0.658296	1.21473	0.553688	-1.61364	0.774625	-1.59994	0.582292	0.68576	0.212333	0.670822	-1.51042	0.328962	0.887379	0.281417	0.507855	-1.51689
cg16615357	0.409632	0.619177	0.382796	0.910737	-0.119225	-0.727285	0.981452	-0.80227	0.589311	-0.994832	0.271787	0.86126	0.661005	0.773084	-1.37035	0.717371	0.0813212	0.547048	0.790736	0.851957	-0.0707504	-1.28591	0.682264	0.00220371	0.602538	0.548073	-1.77359	0.139615	-1.19246	1.01475	1.02617	-1.71242	0.88351	0.424034	0.274057	0.570304	-1.68719	0.790427	-1.61238	0.436003	0.601284	0.112836	0.90853	-1.44355	0.820806	0.310942	0.545096	0.759718	-1.65373
cg18797653	0.588591	0.648478	0.66306	0.681324	-0.0438187	-1.70081	0.944419	-0.937818	0.891749	-1.06896	0.475199	0.670707	0.873475	0.775525	-1.49428	0.73029	0.121307	0.583929	0.305443	0.78134	0.0589374	-1.36954	0.761825	0.111998	0.673953	0.687588	-1.47686	0.00580719	-1.21097	1.46158	0.909082	-1.6014	0.773466	0.56144	0.810957	0.630777	-1.78924	0.810803	-1.60587	0.00721384	0.671815	0.274723	0.981769	-1.42101	1.29487	0.354062	0.383727	0.784953	-1.48128
cg18872973	-2.17906	-0.419863	-1.46594	-2.29042	-1.91663	-2.09668	-2.55148	1.95149	-1.83527	-1.06372	1.34577	-2.73404	1.75983	-0.0888085	0.0466006	-0.140214	-2.6928	-0.0146498	-0.239139	3.38284	-0.358749	-0.311342	-0.964896	0.726453	0.112829	-0.752663	1.76181	0.213379	-5.43447	-0.238453	-3.72706	0.422816	0.520619	0.0236497	0.935335	-1.92284	-2.93638	-1.02627	-0.939712	-1.92814	-5.76144	-4.94229	1.65734	2.05695	-5.21058	2.74651	0.225006	2.02043	-2.02837
cg17739279	-0.767759	0.442219	-1.56115	0.810136	-0.515888	-5.04855	-0.266997	1.94492	-0.762497	-0.359688	0.587613	-0.381802	1.50444	-0.355171	0.590652	0.209503	-3.92906	0.288621	-2.71693	2.78076	0.348092	-0.342463	-1.62651	0.554381	0.683701	-2.86291	-0.205716	-0.501691	-1.26784	0.759691	0.560081	1.07614	1.18042	1.5172	0.729782	-2.08387	2.3527	-2.21666	-1.56293	1.82323	0.0992412	0.914078	0.556073	0.488778	1.57658	-0.164573	1.10287	2.44909	1.85528
cg01570885	-1.98299	-0.509985	-1.05866	-0.236844	-0.13481	-6.49949	-0.955788	1.26091	-2.01639	-1.45608	0.523021	-0.424376	2.32179	-0.685958	-0.00949835	-2.37797	-4.65008	-1.59354	-1.19603	2.19073	0.315191	-1.26086	-1.39676	0.356044	0.15563	-0.773691	0.180704	-0.711683	-7.25701	-1.72606	1.45876	-0.836137	0.582621	1.35505	0.837376	-3.23959	-0.195577	-3.27859	-1.45946	1.23242	-0.922045	-0.522027	1.03363	1.90866	3.67098	-0.561282	-0.313077	1.238	0.169211
cg09821214	0.682304	0.436537	0.330819	0.191011	-0.647122	-6.85413	-0.356982	0.952608	-0.711438	-0.658966	0.744082	-0.182272	0.407602	-0.00282587	0.849543	-1.21962	0.657357	-1.47435	-0.650302	0.91791	0.282154	-1.32334	-1.03247	1.16311	0.487059	0.46229	0.694059	-0.430017	-2.203	0.273328	0.794081	1.33687	0.865211	2.099	1.11188	-2.34267	0.513337	-0.197231	-0.941787	-0.322372	0.0913064	-0.904971	0.551164	1.20198	-0.279302	1.41139	0.189876	0.728935	0.148685
cg07898446	-0.763847	0.512893	-1.08414	0.54377	-2.1808	-8.84777	0.285902	1.2514	-1.279	-1.13019	-1.29074	-0.659394	0.93677	-0.286625	-0.210183	-3.66067	-4.14471	-1.26933	-1.10985	1.26024	1.87306	-0.804891	-0.628285	1.53827	0.188026	-1.15421	1.30927	-0.484954	-8.45274	-0.525415	1.34089	-0.424097	-0.109274	1.24881	1.51806	-3.3909	-0.0224194	-6.14305	-2.7206	1.69948	-0.427169	1.0434	1.45406	0.0925456	4.47662	-2.14979	-0.233216	1.09665	1.43054
cg25195497	0.830958	1.61749	0.499431	-1.11902	0.184331	-5.4362	-0.774421	-0.401117	-0.167975	-1.67833	-0.252104	-1.02409	-0.614242	0.518653	1.64924	-2.14378	-1.63482	-1.72048	0.684078	-0.339604	-0.929279	0.0218348	0.558008	-0.321998	0.954852	0.645527	-1.08379	-0.300211	-4.20212	0.583124	1.87298	0.736914	1.04246	1.18137	1.22519	-1.86119	2.88485	-3.64229	-2.20146	3.51263	2.02854	-0.940622	0.519926	2.5408	1.02069	0.352017	0.660146	-0.605957	-0.0950577
cg21740964	0.123737	0.729356	0.494423	-1.2087	-0.583854	-5.19705	-0.934512	-0.946301	0.271655	-1.86304	-1.28276	-1.18986	-0.942762	0.922053	1.16671	-2.3688	-0.83233	-1.43711	0.654769	-0.119976	-1.3985	-0.436792	0.847152	-0.311893	1.05824	0.682638	-0.814094	-0.226977	-3.43615	1.74814	1.84901	0.136537	0.784526	0.732335	1.97288	-2.44002	1.33417	-3.4791	-2.64857	3.68145	0.884044	-0.900787	0.167765	3.42787	0.768133	-0.640826	0.629908	-0.229988	-0.392
cg13289019	-0.483025	0.479725	0.198541	-0.327337	-0.319389	-4.37155	-1.1348	0.616636	-1.19445	-0.951956	-0.319475	0.23658	0.661815	-0.480527	-0.163153	-1.82506	-1.91198	-0.782523	-1.11047	0.695026	0.168749	-0.196918	-0.876152	0.894761	0.262393	-0.659679	0.281321	-0.658635	-2.72132	0.0338899	0.870356	-0.938202	0.772341	0.96788	0.752449	-2.39055	1.15209	-2.89811	-1.36683	1.34037	0.34933	0.491918	0.691436	0.589424	2.15323	-1.97034	-0.0608962	0.40382	-0.0279389
cg01905633	-1.32991	0.898137	0.593873	-1.76897	-1.77461	-7.28583	-1.26414	-2.48302	-0.826104	-1.67723	-1.80756	0.175015	-0.0875309	-0.0894462	0.344448	-4.29883	-0.280189	-2.36863	-2.03339	0.407308	-1.25279	-0.672699	-0.9495	0.5684	-1.04977	0.632365	-0.401439	-0.198118	-5.55186	-1.03886	0.560587	0.693958	-0.04743	1.04758	-0.676558	-4.93754	0.393629	-5.78619	-3.26814	0.390308	0.63256	-2.03614	-0.99125	-0.802899	0.545975	2.30111	-0.841397	-0.153842	-0.386361
cg21177626	-0.509664	0.697543	0.245787	-0.7715	-0.956955	-4.15773	-0.349699	-0.541785	-0.414397	-0.642927	-1.28144	-0.0591287	0.173909	0.828661	0.580898	-2.76373	-0.53301	-0.638311	-0.954922	0.778301	-0.0338264	-0.789636	-0.86879	1.13583	-0.060356	0.00912084	-0.510348	-0.305109	-3.71105	-0.316758	1.1347	0.64474	-0.733215	1.14445	0.0916183	-3.02234	1.36839	-2.98494	-2.21865	0.298052	0.883585	-0.0700003	0.421518	-0.792746	0.662738	2.39895	-0.271767	-0.126967	-0.30361
cg03954573	-2.01881	0.749306	-0.578448	-1.91026	-1.8836	-8.46861	-1.74914	-1.55994	-0.579653	-2.00607	-2.88963	-0.518582	-0.284511	0.456974	0.338046	-4.50211	-1.4113	-2.05237	-2.83561	0.888089	-0.605013	-1.85644	-0.793312	0.0702548	-0.513427	0.77773	-0.999699	-0.131682	-7.89444	-0.718533	1.10219	0.595466	0.329565	0.91675	0.362131	-5.45571	1.58965	-5.10803	-4.63983	-0.303223	0.695123	-2.21107	-0.270034	-1.01744	-0.0657883	3.43407	-1.07822	-0.696551	-1.21697
cg19362611	-0.627832	0.49035	0.100767	-0.0503997	-1.12526	-8.7137	-1.55002	0.111923	-0.687995	-0.255058	-1.38422	-1.17588	-0.820234	0.792595	0.0174044	-4.76281	-0.301696	-1.57278	-2.33306	2.20426	0.434541	-1.71127	0.607782	1.14196	0.47529	1.046	-0.718755	-0.283841	-7.21096	-2.11671	1.6502	0.203606	-0.334054	1.38171	0.393808	-4.78967	2.4633	-5.89032	-3.58692	1.07978	0.716639	-1.9238	0.234423	0.298139	-0.255998	3.70805	-0.222026	-0.0173236	-0.421576
cg04447621	-0.738356	0.655213	-0.709301	-1.90575	-0.103714	-13.4845	-1.54884	-3.58627	-1.14966	-3.00837	-4.65947	0.498812	0.129826	0.397517	1.06349	-6.41516	-1.93452	-1.24533	-3.73543	0.624641	-2.00355	-1.82832	-1.23718	0.231723	0.799781	-0.125625	-0.906095	0.879497	-9.46052	-0.103679	1.17369	1.29471	-0.781305	1.35987	-0.382028	-7.21024	0.987264	-8.15734	-5.92965	0.409699	0.842501	-2.17767	-3.24705	-0.386241	0.960062	2.79455	-1.17104	-1.0954	-0.903047
cg23835083	-0.703877	1.05238	-0.912121	-1.08862	-0.846596	-6.91529	-2.19484	-3.93756	-0.885691	-1.15732	-4.08334	-0.477855	-0.453637	0.393553	0.390861	-4.99571	-0.452506	-1.10866	-1.80668	1.32286	-0.809681	-1.19738	-0.0905445	0.503043	-0.52218	0.318122	0.0616624	-0.287339	0.749383	-0.126962	1.63895	0.604969	-0.128551	0.901042	-0.0125836	-6.55551	0.552471	-6.09355	-5.02722	-0.590814	1.1114	-3.77559	-0.891897	0.74034	0.605839	2.93702	-0.981456	-0.0380661	-0.44109
cg12497786	-2.54651	2.14224	-1.35316	-3.33192	-0.228626	-15.9284	-2.21658	-9.06995	-1.35745	-3.35121	-7.44212	0.868885	-1.87325	0.861252	-0.631071	-8.54794	-0.978789	-1.68217	-4.98258	0.62439	-1.65055	-0.79306	-1.09126	-2.48872	-1.69634	-2.62753	-0.0145651	-0.704459	3.13604	-2.5999	0.977245	0.526577	1.84343	0.238948	-0.238472	-17.0006	2.23182	-18.8978	-7.98042	1.93376	1.26843	-4.04334	-4.18866	-2.06827	1.54225	1.76243	-0.459501	-2.19577	1.00692
cg03202897	1.26805	-0.0424608	-0.732785	1.23082	-1.83743	-6.17332	-0.475348	0.11953	-1.52408	-1.50225	-0.572799	-0.455398	-0.994536	0.156209	-0.369621	-2.78922	-0.242037	-0.0635215	0.615	1.4828	1.57286	-0.752589	0.065793	0.820243	0.725712	0.315321	0.119789	0.379105	-4.58763	0.174954	1.12868	-0.771618	0.362092	1.12969	1.75332	-3.50376	0.0541116	-4.15234	-2.02466	0.137506	0.317234	-0.687603	0.842983	0.151427	-3.08929	0.430866	0.180966	-1.14947	-0.084601
cg21153160	0.662122	0.427578	0.98669	-1.7534	-0.721672	-9.42426	-0.911897	-2.06038	-1.56904	-0.759607	-2.04736	0.276919	-0.221873	-0.228964	0.251147	-4.85908	-2.44838	0.267147	-1.17985	1.90251	1.14015	-1.05526	-1.54504	-0.0255798	0.397111	0.191394	0.0870148	1.01587	-3.14906	0.248937	1.04574	0.442223	0.994248	0.269624	-0.167184	-4.62602	-1.57062	-6.99734	-2.77466	-0.316651	-0.540152	0.311088	-0.644607	-2.40226	-0.604666	-0.594172	-0.920712	0.14554	-0.377364
cg25073793	-0.945801	0.743158	-0.759237	-1.08392	-1.54805	-4.03095	-1.85208	-1.6712	-0.351498	-1.3287	-1.86364	0.106813	-0.51157	-0.812561	-0.496409	-2.95435	-1.30425	-0.822183	-1.38712	0.759223	-0.472968	-1.38116	-0.358097	-0.590466	-0.0795271	-0.446073	0.143021	-0.100465	-3.88818	-1.70544	0.761898	0.649933	-0.280958	1.78591	0.162407	-3.66348	-0.155472	-4.70926	-3.03503	-1.79395	0.175748	-3.08964	-0.166375	-0.283392	0.196365	0.355808	0.0194679	-0.0965359	0.375297
cg27445347	-0.138036	0.654781	-0.271626	1.41203	-0.597478	-3.59155	-0.676982	0.608434	0.701221	-0.33687	-0.191532	-0.243321	0.106462	0.224077	-0.115325	-1.83144	0.368436	0.688172	0.550244	1.19088	0.0304753	-0.917469	-0.671982	2.22655	0.363683	0.578542	1.06315	0.153388	-6.97772	-2.09079	1.65988	1.02809	-0.0884287	2.20128	1.57013	-2.36439	0.087904	-3.98312	-1.71303	1.24978	0.209386	-3.20152	-0.20152	0.0357039	0.778885	0.639073	0.455705	0.364855	0.07821
cg13101072	-0.959278	0.412295	-0.386959	-1.15899	-1.24233	-2.4378	-1.43889	0.631957	-0.487723	-1.34719	-0.971449	-0.661565	-0.115434	-0.391406	-0.884534	-0.276663	-1.36211	-0.936638	-1.52792	0.800161	0.772819	-1.21839	-0.0822204	0.0131759	0.431724	-0.0202027	-0.222166	-0.310286	-4.72391	-2.43523	0.846145	0.59755	-0.275671	2.26798	0.257918	-2.8041	-1.44777	-2.36685	-1.33835	-0.40391	-0.465639	-2.9928	0.633484	-1.10712	0.0740654	-0.0128698	-0.375011	-0.216952	-0.0222507
cg09730369	-1.35389	0.273407	-1.57775	1.1142	-2.41151	-5.39074	0.619938	0.0896136	-1.33031	-1.25072	1.10269	0.356722	1.43803	-0.0719371	0.891311	0.667476	-2.39605	1.68026	0.325493	1.65902	-0.47249	-16.4209	0.360382	-0.867923	1.86059	0.297583	2.14276	-1.07392	-1.75147	-1.0834	-1.70531	1.55508	1.68344	1.37498	1.30033	-16.9221	1.00544	-8.81739	-1.9199	0.922558	1.35874	-3.33451	2.09879	2.13956	-2.70308	1.8717	1.21291	1.26477	0.78183
cg17865602	-0.565056	0.880175	0.0290857	-0.688996	-5.29705	-6.02922	-0.426794	0.857284	-0.699773	0.0428267	0.773163	-0.741294	0.429947	0.089437	1.31228	0.300532	-1.5968	-0.858801	-0.934091	0.316329	-0.610877	-7.08114	-0.958225	-2.55675	0.814329	1.42154	0.159477	0.0405902	-2.87837	-0.302741	0.151201	0.161161	-0.701923	0.675584	-0.587385	-8.02111	0.270616	-4.45014	-0.778236	0.485169	1.35172	-1.6171	-0.150669	1.98272	-0.959685	1.92697	0.644213	0.998909	1.32582
cg25350411	-1.27478	0.690683	-1.04204	-1.69222	-3.82437	-5.96803	-1.89204	-0.232468	-1.07475	-0.668033	-0.0549619	-1.96934	0.45211	-0.361706	-0.186181	-0.503164	-0.299939	-2.29511	-2.09887	0.984463	-1.60742	-6.42648	-1.28648	-3.0714	-1.49353	-1.0899	-1.22901	-0.770627	-3.11585	1.24321	0.49572	-1.41794	0.928403	-0.0650011	-0.613475	-6.73756	-3.08839	-4.58299	-1.31609	-1.65708	-0.145719	-3.58699	0.745481	0.431912	-4.10666	-0.744015	0.163168	-1.19145	-0.516438
cg07077459	-1.31942	-0.0553165	0.0250209	-1.26124	-2.43047	-12.0231	-2.13392	-0.420013	-1.09274	0.079813	0.737573	-0.298424	1.41765	-0.643234	0.29783	-0.337427	-1.44896	-1.59009	-0.613687	1.2	-1.02238	-13.6839	-1.89066	-1.287	-1.90213	-1.09698	-0.395709	-0.415233	-12.4094	1.01519	0.822472	-2.53525	2.52286	-0.0933773	0.291689	-13.4152	-2.08013	-3.39024	-0.187656	0.481418	-0.645405	-1.90062	0.920003	1.28531	-2.74784	-5.32778	1.26216	-0.899209	-0.766805
cg22352234	-2.91168	0.209457	0.0662387	-0.771508	-1.83245	-8.01607	-0.203056	1.87187	-1.73609	1.15297	1.32178	-1.60845	0.134585	-0.875187	0.181812	-0.042796	-3.80416	-3.11187	0.61827	0.959571	-0.00229084	-18.7835	-1.49039	-1.37611	0.504151	-0.360056	-0.78362	0.523439	-10.511	-1.07997	0.539967	1.58727	3.05894	0.270596	1.82886	-14.8517	-1.48089	-5.17639	0.449671	-0.472414	-0.480859	-0.666476	-1.40872	-2.14221	-0.370964	0.00677007	-0.910204	-0.228516	-1.48577
cg00702231	-0.663026	0.109646	0.185457	-1.35346	-1.04791	-7.85784	-1.68389	0.468883	-1.26564	0.35395	-0.464056	-2.41074	0.0762358	-0.142377	0.151253	0.28462	-0.314394	-1.95204	-0.463854	1.10061	-1.03823	-13.8381	-2.15265	-0.297117	-1.74579	-0.644342	-0.0633067	-0.425168	-15.8291	-0.834048	0.166373	1.08119	0.607397	-0.94337	0.931028	-13.4872	-0.232589	-2.00995	0.689928	1.33974	-0.0620712	-2.43052	-0.161497	-2.43755	-2.26242	-4.5491	0.587715	-1.13412	-0.309666
cg12757684	-0.888309	1.58172	0.0728254	-1.38658	-0.763702	-9.0937	-2.06671	-0.261297	-0.994259	0.479747	-0.630064	-1.03528	0.0409272	-0.179805	-0.244286	-0.0282758	-2.91855	-3.13955	-1.55415	0.86924	-1.20406	-12.1271	-1.4171	-0.693498	-1.69245	-0.0771988	-0.469007	-0.45925	-14.4677	-0.468565	-0.0120299	0.385826	1.02832	-0.929867	0.409974	-12.7302	-0.797694	-1.83358	-0.772272	0.435761	-0.316266	-2.63542	0.778502	-2.11137	-2.70257	-5.09611	0.482542	-1.04985	-1.06177
cg21952820	0.938009	0.392541	0.217179	0.867044	-0.259911	-1.24547	0.0266049	0.963549	0.282704	0.482964	-0.223484	0.9616	-1.01751	0.226934	1.06621	0.161109	-0.124389	-0.0455639	-1.51101	0.46275	-0.123647	-2.10421	0.103579	-0.0257451	1.25516	0.0135876	0.241972	0.266934	-0.659783	1.58356	-1.29636	1.08202	0.478855	0.0143856	-1.26966	-2.61382	-1.49956	-0.778909	-0.0627346	0.181604	-0.708999	-0.340166	0.110392	0.128906	-0.374319	-0.216329	0.390048	0.779413	-0.117393
cg05326984	0.699745	0.0376968	-0.697955	-0.715518	-3.41824	-9.73233	-0.992208	0.0888985	-0.0524026	0.88483	-1.20922	-0.0701397	0.449455	-0.0103739	1.70466	-0.109045	-2.51166	-3.03016	-0.828368	0.26531	-2.14154	-14.9387	-2.1322	-2.51015	0.276297	-0.516393	-0.0547921	0.166794	-1.70462	3.15337	-0.386017	1.19838	1.31063	-0.588063	-0.793162	-19.2263	-0.392836	-6.24255	-1.50504	-1.39019	0.298386	-1.48701	-0.650029	-0.771285	-2.98409	-1.10966	0.118415	-1.16046	-1.66432
cg08263357	1.49	0.77041	0.84591	3.8188	-2.03597	-2.83342	-0.827306	1.54412	-0.892272	-0.752262	-0.62812	0.238448	0.500491	-0.801905	0.547288	-0.167122	-1.79155	-1.96857	1.34283	-0.180522	-0.843087	-6.90229	-0.388957	0.754841	0.652302	-0.439091	-0.881176	-0.434672	-4.19283	0.339702	-1.05099	0.37357	-0.209688	-0.129313	-0.769415	-6.04295	-2.83652	-2.74477	-0.633367	-0.125268	0.792576	-0.364088	-0.14247	-0.131785	-1.72943	-2.09385	-1.12245	1.17498	-0.632687
cg11532302	0.544543	1.67925	0.637631	1.6939	-1.63467	-4.2306	-0.718795	1.49641	-0.467884	-0.161748	-1.23756	0.290847	0.244193	-1.25508	0.759094	-0.0580562	-3.67964	-1.95163	0.251839	-1.13477	-1.18766	-7.45269	-1.18209	-1.13531	0.112606	-0.891736	-0.662945	-0.737277	-4.95166	1.60514	-1.55268	-0.0126284	1.06273	0.348422	-1.07588	-7.19149	-3.38796	-3.28647	-0.956773	-0.1001	0.90567	0.995101	0.485375	-0.758393	-0.929365	0.439118	-1.54744	-0.0186873	-0.551853
cg27216384	0.342578	0.233692	-0.292113	-1.25162	-3.18389	-7.46538	-0.912783	0.464664	-0.00614663	1.70633	0.0596355	0.0594653	2.11913	0.591703	0.767175	0.696919	-1.70703	-2.30766	0.167848	1.73267	-0.790425	-12.5557	-0.716666	-1.56255	1.08211	-0.0573047	1.07866	0.382914	0.951004	3.59092	1.31519	-0.595174	0.563442	-0.62586	1.20267	-15.2596	0.894269	-4.66503	-0.0300884	-0.988725	1.00577	-1.32544	1.14603	-1.1021	-1.41029	1.68887	0.946829	0.170676	-0.598786
cg17895149	-1.3976	0.491167	0.0442156	-1.34517	-1.35837	-5.81248	-0.529503	0.0933166	-0.755914	-1.05415	0.108486	-1.18146	0.595187	-0.407541	1.04616	-0.0548062	-3.94096	-3.11467	-0.647806	-0.726539	-0.727418	-8.87278	-1.08849	-3.50712	-2.15394	-0.141656	-1.01527	-0.280097	-2.82473	-0.456147	0.232847	-1.67833	1.69353	0.532931	-0.248778	-8.1137	-3.58687	-4.54555	-0.30912	0.126097	0.295156	-2.40069	1.051	-0.98281	-2.47085	1.09324	-2.18537	0.248696	-1.10042
cg23460430	0.000336709	0.765915	-0.329039	1.35877	-2.87682	-3.09731	-0.699839	1.28829	-0.496867	0.047681	-1.0663	0.211582	0.416494	0.711678	0.407629	-0.734392	-2.53894	-1.23761	1.2149	0.509339	-0.327082	-3.85719	-0.938287	0.0994853	0.594168	-1.44836	-0.358495	0.379826	-2.03099	1.17937	-0.525077	0.740532	-1.04534	-0.566496	0.240128	-4.16823	-0.736313	-1.80732	-1.53355	-1.13213	-0.484761	-1.98785	-0.727219	0.476606	-1.13868	-1.37821	-0.473956	0.499202	-1.53159
cg12625139	-1.17989	1.1748	0.0123898	-0.286391	-3.87502	-5.61906	0.120931	-0.56555	-2.64926	-1.09889	0.235975	-0.159259	-0.0561724	0.0995903	1.34809	-7.85685	-1.0655	-2.043	-1.25129	-0.360725	-0.237523	-0.874957	-0.680878	0.353481	0.268693	0.499626	-0.00782253	-0.296299	1.32489	1.95366	-1.10397	0.0476234	0.30231	0.813883	1.24119	-7.46863	-1.32948	1.46221	-10.36	0.634026	0.724836	1.64681	1.40497	-2.18194	-1.73398	1.40903	1.30579	3.30433	1.2473
cg08350488	-0.583056	1.17935	1.01114	-0.959851	-2.02584	-3.51664	0.808091	-0.547387	-0.245064	0.131567	-0.729185	1.56611	-0.361396	1.54102	-0.946198	-3.32287	-0.269937	0.996143	-0.570078	-0.107912	0.487351	-0.409375	-0.00170819	0.406745	0.206299	0.0832782	-0.0680761	-0.95332	2.75966	0.258108	0.407732	0.137904	-0.122139	0.229276	0.0494824	-3.06326	-0.880923	0.254297	-3.61544	1.8996	-0.591512	-0.471343	0.173543	1.45486	-0.370901	-1.65042	-0.120516	5.91338	-0.141887
cg11938672	-0.738541	2.70175	2.48979	-0.923909	-1.85747	-4.00778	-2.04774	-4.48003	-0.539948	2.16783	-0.16785	-0.482198	-0.508758	-0.441246	-0.197507	-3.94785	0.0897665	-0.80883	-0.980615	-0.103682	-1.08431	-0.992818	-4.20727	-0.620641	-0.224471	-0.914389	-0.44366	-0.776359	0.135147	-0.421847	-0.258888	0.195301	-1.22315	2.61209	-0.355837	-3.53459	1.59202	-0.24146	-2.89252	-1.79158	-0.520096	-1.27138	-3.94836	-0.335932	-1.69247	2.26011	-0.880653	-0.4576	-0.580085
cg18322025	0.00253312	2.93164	2.48275	-0.680124	-1.23103	-2.74341	-1.29789	-2.60423	-0.572103	2.40316	-0.0531956	-0.308304	-0.447645	-0.487113	0.0405746	-2.06911	-0.170086	-0.72959	-0.739036	-0.155308	-0.793322	-0.965641	-2.17938	-0.37181	-0.358319	-0.396003	-0.149932	-0.774136	0.180003	-0.0430839	-0.363154	-0.0628356	-0.65751	2.85505	0.00521503	-1.91391	1.75424	8.58262e-05	-1.95474	-0.749395	-0.0614167	-0.811169	-2.04342	-0.26549	-0.884808	2.90315	-0.174608	-0.393466	-0.135019
cg03104936	-0.496903	-1.2268	-0.96266	-1.95452	0.7134	2.29001	0.00870232	0.804459	-1.06826	-1.0016	-0.965184	1.56372	0.500027	-0.60664	0.858095	0.0339005	1.27478	0.424905	-1.27666	0.38083	-0.781205	1.71348	-1.29627	-0.0234227	0.381304	0.881631	0.404252	-0.0651595	-5.22518	0.959597	0.00305527	0.0716719	-0.502815	-2.19085	-1.60951	-0.91503	1.56475	-0.451958	-0.693102	-3.66729	0.160197	-0.936205	-0.920864	-0.315512	-0.374609	2.79774	-0.664538	-1.2172	0.187786
cg05998930	-1.88594	0.0465543	-0.924282	-0.933626	0.34573	0.229628	-0.956726	0.508682	0.11996	-1.41412	-1.72495	1.03997	-0.776241	-0.578551	0.0162654	-1.19586	2.12348	-0.694389	-1.28706	0.0901366	-0.0497	0.663123	-0.880774	0.78749	-1.22111	1.94554	0.171708	0.534289	-4.01454	-0.940636	-0.248911	0.530226	-1.32084	-1.68176	-0.570449	0.231207	-0.684872	-1.35639	0.171618	-1.86188	0.990796	0.922663	-1.25714	-2.31107	-1.39107	0.14443	-0.478977	-0.762988	1.86379
cg09150232	-2.66337	0.691557	1.01349	-2.74668	-0.790985	0.948511	-0.00349239	1.13234	-0.424324	-0.999014	0.389389	1.02995	0.378677	-0.1972	1.3583	0.421843	-0.563907	0.466972	-0.603791	0.49151	-0.35277	-0.323699	0.0167483	-3.28881	0.0607385	1.45244	1.19592	0.799401	-8.57787	0.527881	-1.36961	-0.545806	0.87932	-1.26371	0.0985716	-0.129856	-2.5701	0.808885	-2.84572	-0.469083	1.28617	-0.206023	-0.0927914	-4.17173	0.0168452	2.60221	-0.352018	-0.0133167	-0.263043
cg16349612	-2.11947	1.61432	1.07524	-1.39555	-4.00173	1.00936	-1.22337	2.02935	-0.279778	-1.14689	0.539567	2.62156	2.43097	0.91869	2.95638	0.242006	-0.737612	3.86192	2.56485	3.23155	-0.127599	-0.905381	-1.07631	1.38251	1.81466	2.03907	1.73114	1.00081	-2.91813	1.6699	-0.598876	-0.406146	1.3541	-0.650817	1.88408	-0.804257	-0.681221	2.39214	-3.93638	0.754013	2.67447	-2.41793	-0.449466	0.726291	1.12178	1.53747	2.82812	1.66374	0.903771
cg23742152	-0.275242	0.366166	-0.309629	-1.8265	-3.89666	-2.16156	-0.0592993	0.830971	-1.17008	0.557557	-0.522276	1.25548	0.539649	0.922009	0.706628	-2.65865	-0.671502	1.23554	0.996971	0.156189	-0.423022	-0.742299	-0.1832	1.75488	0.577849	0.458696	-0.888727	-0.303295	0.818567	-1.79697	1.3418	1.18122	1.22537	0.517649	0.62522	-0.62697	-0.129688	0.583916	-0.910851	-0.951515	1.88143	-1.37939	-3.69822	-1.86405	0.309896	2.62289	-0.7514	-0.145529	1.39521
cg08835688	-0.289933	0.0681415	0.695474	1.04335	-5.21019	-3.3628	-0.780099	0.961467	-0.54396	1.23964	0.932141	-0.430371	0.131584	0.66248	0.274683	-5.04346	-1.01405	0.383839	3.48378	1.22111	0.208192	-2.30115	-1.13025	3.21962	0.532103	-1.29769	0.942139	1.90102	-3.9573	0.64245	0.452708	-0.78188	0.770554	-0.484416	0.564909	-0.0496251	0.513923	1.19755	-1.44363	-5.60777	0.0645571	-0.423476	-4.97283	2.22653	-1.25008	-1.78396	1.4855	1.42252	0.297692
cg12903171	-0.67734	-0.937388	-0.787651	-0.14362	-4.0851	-0.753006	-1.67203	0.135319	-0.322949	-0.780921	-0.136949	-0.226224	0.661491	-0.402938	-0.19981	-3.85182	-1.92719	-1.62723	-1.07483	-0.154596	-0.666116	-1.17861	-0.24906	0.802474	-0.149575	-0.33978	0.0527861	0.0689403	-3.63417	0.00493174	0.0484637	-0.109952	0.555573	0.0577422	0.0494774	-0.992534	-1.19644	0.596332	-1.37786	-2.89926	-0.00935776	-0.192058	-3.9293	-0.859056	-1.59922	-1.69311	-1.9328	-0.779722	-1.24021
cg24977055	-4.17105	0.217632	-1.19205	-0.424402	-4.99194	-0.959102	-2.19696	1.31105	-2.22586	-2.40675	1.53965	0.485965	0.0972594	1.31198	0.324178	-5.24281	-4.08561	-1.01732	-0.394021	0.661389	-1.57073	-0.460602	-0.13255	0.827406	2.07882	-1.3879	-2.50058	-0.717918	-0.950691	0.62027	0.725854	0.286754	-0.0487948	0.380295	-1.41788	-0.186689	-2.66988	0.411304	-2.5493	-1.39047	0.0295133	-0.086478	-5.77144	4.63349	0.995704	-1.95225	-1.18062	-0.860955	-1.78307
cg19107595	0.386243	0.647896	-0.0477103	-1.14738	0.570739	-0.622998	-0.800133	-1.9998	-0.744847	-0.992333	-0.341159	-0.0741633	-0.0202489	0.805539	0.282199	0.237275	-1.36665	-0.0737374	0.18826	0.975071	-0.3849	-0.451768	-1.36566	1.45588	-0.955946	0.231738	-0.582007	-0.917038	-3.04137	0.496637	0.236486	1.02429	0.58357	0.514466	0.05311	-0.513168	0.506147	0.485469	-0.204348	-0.499477	-0.280238	0.283244	-0.102092	-0.190379	0.469082	-1.4256	0.285568	-0.517241	0.515666
cg19924104	1.13263	0.30608	0.478548	-0.354789	-1.54491	-0.599062	-0.141955	-5.29044	-0.917376	0.0974229	-0.443475	-0.106094	-0.0699631	-0.0533646	0.633606	-0.0873967	-0.612992	-0.0405287	0.737479	1.27205	-0.00259398	-0.85516	-0.549035	1.5073	0.7273	0.139905	-0.0409636	-0.237721	-3.24898	-0.383243	0.630338	0.532294	1.67556	0.284059	0.654814	-0.355402	-0.575749	1.23758	0.569848	-2.76032	0.460841	1.3781	0.907158	-2.41368	0.38358	0.365893	0.395353	0.434249	0.268063
cg11589966	-0.98163	0.834128	-1.11252	-1.42785	-4.12779	-1.25153	-0.904928	-9.87593	-2.33031	0.36061	-0.868875	-0.0313183	0.839626	-0.207683	0.249974	-0.542672	-1.35425	0.42375	-0.951837	0.597436	0.417824	-0.515902	-0.443469	1.68109	0.594101	0.534603	-0.620215	0.888538	-11.108	-2.25864	-0.580512	-1.37775	0.287667	0.191585	0.356176	-1.09496	-1.20305	0.0190375	0.658561	2.11762	-0.885266	-1.16086	0.132569	0.334292	-2.03073	-0.369277	-0.31089	-0.0993907	-0.612453
cg01566785	-1.06035	0.370279	-0.435413	-1.25507	-1.15419	-1.43123	-0.553243	-9.90663	-1.1749	-0.853423	-0.621873	-0.672168	-0.153792	-0.0903232	0.595822	0.205027	-2.02813	0.0565988	0.333399	-0.455346	-0.0680266	-1.68947	-0.433708	1.48237	0.116909	-1.3858	-0.129037	-0.07321	-7.71326	-2.74367	0.539212	-0.644475	0.125735	-0.224596	-0.0310433	-0.34825	-0.323423	0.890892	-0.684575	0.545096	1.72141	-1.65816	0.79691	0.188339	-2.12972	0.466615	-1.31105	-0.472477	-0.0431602
cg05819130	-0.912053	-0.929599	0.112007	-0.774491	-5.03925	-1.52245	1.58108	-10.0197	-1.28806	0.974458	-0.282653	-1.00748	-0.993165	0.965608	-0.800897	-0.281472	-2.3735	-1.48894	-0.527857	0.0426931	-0.684203	-1.46494	-2.15907	-0.195828	0.637397	-0.561139	0.342218	-0.504644	-7.38973	-3.23112	0.308753	-1.21992	0.724807	0.359826	0.298858	-1.52292	-0.282038	0.176025	1.43496	2.65938	0.674829	-1.7923	0.893221	-0.085467	-2.58789	-2.58908	-0.221364	-0.106315	-0.293588
cg10105290	-0.871897	-0.810718	-0.329693	-1.63816	-2.07834	-2.65153	-0.818696	-10.9466	-0.318587	0.907597	-0.419863	-0.956684	-1.26096	0.607028	-0.153637	-1.035	-1.65073	-1.43814	-1.59957	-0.956497	-0.199268	-1.04415	0.125328	0.113835	0.636435	-0.380542	-1.02787	-0.232849	-7.40555	-3.81261	0.321573	0.36325	1.80629	-0.805118	1.05477	0.319723	0.414463	0.903076	0.0234397	1.50494	1.3888	-2.248	0.296927	-0.457709	-2.86573	-2.62365	0.0299548	-0.985517	0.0601708
cg19079047	-0.576598	0.431729	0.43833	-1.36732	-1.60558	-0.911742	-1.12294	-7.27714	-1.12413	1.33582	0.512237	1.13605	0.80772	0.22212	-0.105857	0.440426	-1.06586	-1.19951	-0.127876	1.10402	-0.17368	-1.28359	-0.503625	0.836059	0.942403	-0.119268	-0.307276	0.26	-6.06871	-3.065	0.4666	-0.562403	1.2017	0.280404	0.730108	-0.848576	0.193414	1.02031	0.949957	1.89893	1.07321	-1.36281	0.95284	-1.91946	-2.28258	-1.99861	-0.283099	0.538978	-0.505356
cg02965180	-1.28602	-0.213257	0.753315	0.00613111	-1.58103	-1.30596	-0.846314	-10.5495	-0.952597	-0.0124264	-0.0925163	1.09844	-0.243127	-0.0927783	-0.685367	-0.0429425	-1.43154	-1.42701	0.182074	0.419876	-0.520848	-0.906675	0.213211	2.07753	-0.467882	-0.419249	-0.198554	-0.60112	-8.02275	-3.32774	1.14501	-0.321202	1.11066	-0.143767	0.361326	-2.06522	0.545815	1.49567	0.062199	1.80581	0.923584	-1.47808	0.660395	-1.47423	-2.24258	-2.00208	0.119147	-0.350218	-0.916238
cg05277165	1.01935	0.626579	1.50855	-0.265427	-3.01113	-1.63202	0.0682129	-11.6666	-0.767982	-0.709986	0.909873	0.48992	0.108108	-0.496594	0.0316067	-1.25404	-1.02163	-0.959019	-0.0646441	1.70916	-0.188335	-0.51432	-0.109522	2.08995	1.13156	-0.324758	-0.275676	1.16967	-2.76117	-0.178821	1.85947	0.44425	1.26821	0.0169401	1.08136	-1.16089	-0.621019	0.628422	0.0292152	-3.4997	1.79986	1.08607	-0.342885	-6.46526	-0.528859	0.163818	1.3914	-0.605649	0.828675
cg06674062	-0.877774	-0.294993	-0.295975	-1.24323	-1.76948	-2.31705	-1.14496	-5.80583	-0.36293	-0.579922	-0.152386	-0.259719	0.525984	-0.623427	-0.370618	0.709527	-0.754001	-1.42142	-1.23638	0.0876876	-0.412938	-1.58648	-0.560946	0.870087	-0.143977	-0.174994	-1.3923	-0.856857	-3.62408	-2.45022	0.536178	-1.01324	1.02715	0.595431	-0.140687	-1.10239	-0.295117	1.37512	0.025841	0.960543	0.82798	-3.03804	0.573713	-0.812397	-3.30351	-2.0268	-0.992854	-0.180918	-0.344089
cg21778340	-0.220122	0.0195893	-0.358572	-1.01172	-2.39684	-0.829595	-0.307104	-4.00251	-0.205114	0.581695	-0.312501	-0.0282698	0.505955	0.124834	-0.0732664	0.636526	-1.57325	-1.17593	-0.420476	-0.0904444	-0.390971	-1.97251	-0.577101	0.808658	1.02132	-0.4028	0.0679829	-0.81583	-3.5149	-1.23972	0.989137	-0.786471	1.88366	-0.225756	0.166607	-0.204435	0.219767	0.691434	0.355519	0.928796	1.38995	-2.59123	1.2311	-0.688739	-1.9687	-2.30908	-1.38697	-0.187472	-0.0447808
cg07921535	-0.894118	0.209709	0.214633	-1.35494	-1.26417	-1.17057	0.332953	-2.42499	-0.129931	-0.101754	0.318154	-0.528182	0.804427	1.0413	0.141772	-0.560738	-1.29439	-0.437505	1.30004	0.395968	0.658126	-1.06555	-0.187297	0.997308	1.12798	-0.52758	-0.0382117	-0.452539	-1.37376	-2.07343	1.02693	-0.413812	0.193961	-0.288634	0.463924	-0.638885	0.156306	0.179218	0.891364	1.02785	1.33074	-1.9289	0.889054	-1.33812	-1.83241	-2.03338	-0.935308	-0.146285	0.0665077
cg09910998	1.96188	0.578058	-0.0248864	-0.418918	-2.55729	0.562133	0.510026	-7.13134	0.473698	0.48129	-0.181639	0.148951	0.763939	-0.731843	0.480482	0.004533	-1.35549	-0.861576	-0.573182	1.1766	-0.250295	-1.04251	0.120002	2.00664	1.59399	-0.335779	0.127929	0.22031	-2.71508	-1.82082	0.83768	-0.432952	1.90853	-0.34275	0.327904	-1.6883	-3.27208	0.364627	0.395929	-4.88684	1.79284	1.66103	0.699559	-6.5524	-0.908894	1.79849	0.828021	-0.767622	-0.457642
cg27393730	0.969067	-0.0694982	-0.242116	-0.927252	-2.36703	-0.204506	-0.460058	-7.29171	0.0312474	-0.0367107	-0.484219	0.27087	-0.541794	-1.17939	-0.67491	0.226778	-1.82832	-1.56235	-0.683673	0.524185	-0.897144	-1.4715	0.601912	1.41184	1.02909	0.428375	-0.681522	0.261219	-2.31359	-0.621343	0.236985	-0.430842	2.00062	0.431313	-0.00909014	-1.9493	-3.02981	0.394484	1.35403	-3.82551	1.3052	2.09851	1.01127	-7.11895	-2.03624	0.699382	-0.278091	-0.538017	-0.844411
cg08291000	0.916797	0.337188	0.252651	0.301597	-1.41058	0.780682	-0.407948	-5.54747	-0.0296422	-0.100264	-0.0487212	-0.371425	-0.0379177	-0.203783	0.96255	0.34046	-0.397912	-0.551465	-0.829513	0.70841	-0.962679	-0.739908	-0.0777157	2.37699	1.47274	0.534378	0.0665265	-0.711526	-2.45322	-0.696302	0.945889	-0.197948	2.04401	0.952811	-0.194976	-1.63441	-2.93038	0.997976	0.803456	-2.67597	1.62788	1.24826	0.239084	-3.96686	-1.85429	1.70152	0.115275	-0.284925	-0.614973
cg27230044	0.830476	1.01976	-0.391421	0.243573	-1.44224	0.520089	-0.212785	-5.00771	-0.408902	-0.409209	0.527475	-0.103417	-0.0668114	-0.327968	0.579089	0.270879	-0.47988	-1.09115	-0.437717	-0.0363481	-0.577517	-0.641011	0.270094	2.14298	0.89804	-0.481746	-0.637598	-0.17623	-2.26481	-0.476537	0.674075	-0.907619	1.89155	0.0537012	0.783528	-0.878821	-2.35567	0.369564	0.334303	-0.088561	1.25851	1.76008	0.457079	-2.87321	-1.32233	2.12466	0.323567	-0.774375	-0.34989
cg24885794	-1.0086	0.280867	0.151066	-0.67494	-2.09498	-1.52319	-0.269826	-4.1577	-0.025541	-0.536523	-0.28872	-0.195216	0.455015	-0.0860527	0.20713	0.0836258	-1.34452	-1.51074	-0.628873	1.0343	-0.295912	-0.975155	-0.00265634	1.03446	-0.364346	0.198378	-0.737294	0.0818968	4.23062	-1.24619	1.25491	-0.760407	1.81315	-0.149383	0.372222	-0.289565	-0.358577	1.05217	-0.0609577	0.728434	0.599091	-0.390818	1.11231	-0.538778	-1.15726	-2.49448	-0.881833	0.125729	-0.389955
cg26997085	-1.67439	-0.00759098	0.350092	-0.486828	-2.76864	-1.8385	0.0530405	-3.80235	-0.274185	0.0101005	-0.267248	1.16385	0.399729	0.477642	-0.0406072	0.212017	-1.04407	-1.57192	-0.632694	0.357984	-0.379178	-1.60957	1.65039	0.861265	0.27217	-0.103817	-0.669743	0.260888	1.03261	-1.82986	1.54439	-0.783645	1.65495	0.00886684	0.376862	-0.566037	-0.825546	0.666858	-0.017995	1.76097	0.568481	-2.28243	0.946797	-1.14287	-1.73155	-2.45377	-1.25049	-0.52048	-0.208321
cg22331138	1.22197	1.34726	-0.0310655	-0.0918899	-3.93533	1.65564	-0.429754	-7.31966	-0.310405	-0.407243	-0.385436	0.449563	0.970006	0.303519	0.906999	0.530816	-0.28012	-0.339172	-0.996791	0.125473	-1.29738	-1.06483	-0.281873	2.49197	1.11676	-0.60569	-1.42151	-0.121203	-1.60047	0.0763587	1.14573	-0.339683	2.32027	1.27925	0.723184	-1.7984	-0.601505	0.727714	0.27982	-5.29358	3.43065	0.245956	1.13787	-2.70547	-2.68621	0.0692807	0.753468	-0.727994	-0.705477
cg16492735	-1.5742	1.06505	0.45585	-0.542756	-2.64798	-3.17568	-0.166863	-7.19602	0.152591	-0.0230623	0.213231	0.77568	0.638278	0.0868286	0.62742	0.602753	-1.63328	-1.76852	-1.10612	-0.14999	0.0927154	-1.85877	0.173511	0.801358	0.321276	0.013846	-1.33574	0.448471	6.35081	-2.05163	1.61474	-0.698684	2.45891	-0.323714	0.257409	-1.11596	-2.53729	0.775761	0.218282	0.224145	1.29097	-2.11678	0.491047	-3.26578	-1.89427	-1.69866	-1.36263	-0.00886611	-0.51034
cg09512080	-1.73913	0.226003	0.344963	-0.118388	-1.93433	-2.61106	0.0154073	-8.01007	-0.188951	-0.422732	0.194004	-0.0595592	0.244301	-0.760086	-0.0635223	-0.148443	-0.796715	-1.10833	-0.30632	0.12093	-0.775148	-2.10261	-0.161903	0.319645	0.234283	0.298159	-1.18822	-0.244882	4.94529	-1.98123	1.66325	-1.51434	1.41019	-0.235285	-0.0983214	-1.18361	-2.68478	1.48413	-0.254176	0.543677	0.580235	-2.44439	1.32846	-2.33165	-1.66207	-0.781984	-1.17359	-1.09806	-0.229484
cg00906934	-0.884337	0.056614	0.435844	-0.846261	-2.53475	-1.60922	-0.266595	-7.28348	-0.354262	0.184631	0.410759	-0.627425	0.742137	0.0320112	-0.00741263	-0.190903	-1.72845	-1.28983	-1.1197	0.72711	-0.417308	-2.09214	-1.03123	0.728866	0.535151	0.390322	-0.839087	0.391062	5.70592	-2.49412	2.01667	-0.512567	1.60091	-0.744642	0.969137	0.0792724	-1.39177	0.32924	0.485071	0.386576	1.11383	-2.19596	2.17797	-3.08222	-0.959183	-1.43096	-1.20806	-0.345797	0.18783
cg26503018	-1.18938	0.584392	0.348075	0.878153	-1.85458	-2.22309	0.364926	-8.26694	0.372772	-0.151091	0.302772	-0.52261	0.576886	0.977656	0.502431	0.205931	-0.649838	0.0807696	0.162458	0.798222	0.00703683	-2.80052	-0.167152	1.31619	0.851492	0.584373	-0.216394	-0.372788	4.64579	-1.11994	1.25573	-0.787566	3.4649	-0.378151	0.803017	-1.62837	-0.871637	1.54509	0.408234	1.93239	0.4236	-2.25311	0.255461	-0.673615	-1.37567	-1.11352	-0.814001	0.238845	-0.466395
cg27120649	0.742675	0.917394	1.25522	-2.29378	-3.38792	0.51105	0.565887	-4.94626	-0.789262	-0.375764	0.31755	-0.0114592	1.34905	0.310704	1.33664	-0.279859	-1.05734	0.82205	0.126981	0.552903	0.512701	-0.727554	0.0574732	1.95485	1.89586	0.133316	-0.315366	0.496371	-0.136875	0.306551	1.78987	0.299601	1.9788	1.41202	1.20676	0.106978	-1.11826	1.45073	1.0343	-3.53015	1.6736	0.953677	-0.0827115	-2.70426	-2.35621	-0.379193	1.25684	-0.170056	-0.0650627
cg21771834	2.59102	0.915483	1.05029	1.74517	-4.10818	1.44547	-0.596103	-10.889	0.331891	-0.0751311	0.198504	-0.217196	0.513167	2.17508	0.536698	1.67655	1.48252	1.66826	0.788742	1.6045	0.747902	-0.309263	0.439748	1.40457	1.64704	1.71957	1.09343	0.315159	-2.00719	1.9589	3.34306	-0.592488	0.89883	1.43812	2.41492	-2.18562	-0.716217	1.64975	0.436825	-5.97212	2.35792	0.633026	0.412058	0.0236591	-4.85803	1.653	1.78785	-0.695585	-0.0827151
cg27001184	-0.212798	1.37231	-0.267774	-0.0545773	-2.44289	0.0133985	-0.712194	-7.70479	0.163315	0.332791	-0.23866	0.331737	0.6546	0.528882	0.515405	0.967663	0.723965	0.240866	-0.590385	0.601087	0.246971	-1.09029	-0.134596	1.9762	0.782305	-0.318959	0.0445119	-0.307485	-1.33141	-0.0660051	1.88991	0.457112	2.245	0.514122	1.42303	-0.91863	-0.932412	0.949916	1.45232	-4.32807	2.23253	-0.0452409	0.518058	-0.315686	-4.7655	2.80301	0.783337	-0.588463	0.207338
cg23342787	0.411577	1.28032	0.322474	1.01718	-3.4559	0.27484	0.896459	-9.78385	0.395124	0.5316	0.188155	-0.241158	0.508362	1.08465	1.04343	1.1349	1.0026	1.78477	0.445704	1.39485	-0.455372	-0.489924	-0.161467	3.49485	1.77807	1.34222	1.33148	0.240152	-2.19255	0.898597	2.90502	-0.0318685	1.5619	1.13897	1.56429	-0.950935	-0.410923	1.90644	-0.063809	-3.93206	1.5009	0.150179	0.179755	-0.357632	-2.84667	2.32054	1.92248	-0.496155	0.922987
cg14873490	-1.16008	0.950107	0.931676	0.228447	-4.37683	-5.33391	0.29838	-13.145	0.146249	0.754896	0.454467	0.281034	0.945272	0.848605	0.908788	-0.32088	-1.28843	-0.306582	-0.307567	2.58367	-0.845476	-1.69399	-0.501434	2.10471	1.14633	0.636422	-1.72372	1.2236	9.3302	-1.92529	3.25184	-0.801621	2.74468	-0.508873	0.806871	-1.48917	-2.49271	0.667389	-0.417882	1.29844	1.37831	-2.63751	1.52701	-2.84918	-2.39665	-2.16266	-0.25513	-1.13104	-0.607767
cg03384175	-0.597305	0.141734	0.198373	1.22258	-1.78363	-2.34142	0.383153	-7.51988	-0.638191	-0.0785531	0.0230803	-0.1179	0.697693	0.405699	0.120318	-0.0834118	0.00858349	0.901671	0.866048	0.650796	-0.916427	-1.20217	0.0662407	3.23033	0.837812	0.211601	-0.816192	-0.379038	4.30012	-1.53223	1.74821	-0.565223	1.0536	-0.387615	1.36894	-0.979567	-1.50625	1.41074	-0.395603	1.94812	0.717439	-1.81815	0.694198	0.286888	-1.32437	1.43359	-0.085361	-0.844479	0.139789
cg11985632	0.375085	0.191897	0.634643	2.85377	0.0309892	-0.911051	1.65843	-7.10349	1.31778	0.541805	0.139278	0.298607	0.248182	0.155705	-0.0999697	-0.304368	1.15815	2.17624	2.20389	2.09926	-0.338477	-1.82128	-0.208393	2.84833	1.16968	1.14139	0.182066	0.483553	3.08495	0.674679	2.64752	-1.18029	0.750074	0.0352953	2.56832	-0.841686	1.59513	0.977843	1.88613	2.26772	0.147472	0.254373	1.00784	2.04107	0.512764	2.61218	0.134902	-1.71289	0.0291051
cg13797824	-1.16379	0.460917	0.10685	1.18709	-1.80865	-1.34287	-0.511855	-6.96903	1.07243	-0.0720427	0.27368	-0.122336	0.408118	0.00824215	0.279948	0.00819003	0.701128	0.614593	1.33797	0.153963	-0.415919	-1.25602	0.101706	2.97274	0.515123	0.686959	-0.227574	-0.30343	3.66182	-0.753765	1.86411	-0.797959	1.53734	-0.265682	1.38979	-1.15355	-0.250058	0.799968	0.135698	1.63442	0.195188	-1.75166	1.3012	0.422994	0.338047	0.67822	0.687183	-0.419666	-0.0674833
cg11175683	0.183031	0.138843	-0.00821151	-0.292634	-1.95454	-0.412038	-0.409707	-5.58415	-0.473035	-0.362502	0.683732	0.211147	-0.345932	-0.362507	0.366119	-0.14846	0.626195	0.453147	-1.05079	0.361092	-0.457716	-1.02903	-0.321699	1.10348	0.360599	-0.311862	-0.287639	0.24332	0.502773	0.501343	0.959267	-0.0962537	2.19	1.29564	0.213685	-1.02825	-0.226254	0.327001	-0.0841004	-1.18347	0.837431	-0.315912	0.578363	-0.660167	-1.81245	0.089416	0.382303	-0.527064	0.273889
cg04521244	-0.390014	-0.103228	0.374521	-0.276402	-1.93463	-0.120109	-0.84353	-5.9504	-0.425713	-1.19503	0.228611	-0.294432	0.29461	-0.701646	0.269613	0.349465	0.0687506	-0.577452	-1.2463	0.597925	-0.369239	-0.832556	-0.646164	1.04963	0.534107	-0.653409	-0.184735	-0.247585	0.62185	0.622003	1.06612	-0.400451	2.63738	1.19841	-0.140933	-1.21038	-0.538972	1.43323	-0.0379953	-1.56806	0.717702	-0.853293	1.11935	0.142408	-1.58784	-0.226596	0.0739921	-0.894096	0.345972
cg11562309	-1.01379	0.584267	0.809842	-0.381956	-1.981	-2.72046	-1.09674	-7.3122	-0.404679	-0.85352	0.104422	-0.207165	-0.0190746	0.372535	0.587813	0.508198	-0.333893	-0.751636	0.128887	0.122282	-0.6615	-1.69223	-0.835304	2.30195	0.9832	-0.139258	-1.33008	-0.78144	2.95304	0.145847	0.988241	-0.488337	3.03294	0.258308	0.778496	-0.428035	-1.0049	1.76012	0.552163	-0.0621109	1.11674	-0.947533	1.90926	0.774067	0.294454	1.4744	0.362943	-0.150662	0.700777
cg18898992	-0.731683	0.915182	0.480577	-0.0648771	-1.98609	-1.5276	0.523265	-7.96438	0.754143	0.13529	0.347344	0.400775	1.12595	0.41375	1.06378	-0.279693	-0.0200662	-0.194058	-0.713514	1.00435	-0.477273	-0.954797	-0.882736	1.03748	1.219	0.0753119	-0.0513115	0.227963	2.96861	0.611338	0.635946	-0.347687	2.44484	1.44233	1.20857	-0.92622	-1.74458	0.91474	0.493715	0.677599	1.09314	-0.582304	1.61626	0.220189	-0.198895	1.4357	1.12888	0.0441857	0.313939
cg05096321	-0.828177	0.104621	0.633488	-1.07843	-5.10935	1.33027	0.342106	-13.2192	0.42414	0.373677	-0.265842	-0.0299872	-0.0673581	0.388025	0.424719	0.748884	0.545891	-0.161667	-0.256666	0.807864	0.0312347	-1.04942	-0.591141	1.56963	1.35239	-1.17054	1.09144	-1.70231	3.05075	1.39123	2.60677	0.142877	2.84201	1.03931	0.580523	-1.66389	-0.0826134	0.735831	-0.231254	-0.727888	1.54761	-0.0448272	0.517623	-0.00419738	-2.72813	-2.27764	1.67627	-1.77179	0.666261
cg19663555	0.765411	-0.180263	0.228059	-0.0721426	-4.05475	0.467749	-0.594229	-9.19397	0.242825	-0.318699	0.351848	-1.05643	-0.641568	0.910929	-0.0245566	0.012038	1.40773	0.146143	-0.533855	1.51793	0.452393	-0.390789	0.252283	0.664473	1.05444	-0.418973	0.476797	-0.421986	3.12552	2.04947	1.82589	-0.478514	2.12451	0.986713	1.50225	-0.389837	-1.39267	1.63909	-0.450144	-0.807663	1.46553	-1.22619	1.62529	0.537914	-3.52124	-2.07042	0.767172	-1.24945	0.417948
cg06695761	-0.188757	-0.0710314	0.841414	0.396298	-3.26471	0.597536	-0.81366	-8.28013	0.358825	-0.433723	-0.0917057	-0.524609	-0.262496	0.632478	0.149234	0.545736	1.35935	-0.0486058	-0.894668	0.769292	0.390376	-1.05618	-0.204593	1.32529	0.521362	0.124174	0.312866	-0.647031	1.07013	1.10674	1.9539	-0.464816	1.58971	0.965562	0.841153	-1.70069	-1.29266	0.755598	0.229199	-1.04842	1.65988	-0.72064	1.30908	0.226429	-1.7415	-1.6503	-0.120716	-0.319156	0.37724
cg21853542	-0.0984854	-0.500012	0.0402427	-1.27614	-2.8024	0.2293	-0.987827	-9.27144	-0.9756	-0.551376	-0.368967	-0.439467	-0.240825	0.51942	-0.0759605	0.210092	-0.106773	-0.691524	-0.558516	1.05297	-0.462258	-0.704508	-0.330891	0.191121	0.515598	-0.541115	0.395293	-0.316905	2.70414	0.930772	1.08794	0.460025	2.18285	0.523209	0.33413	-1.17798	-2.29091	1.27929	-0.0639788	-1.76551	1.97599	-1.13732	1.29451	0.391297	-3.76147	-3.14062	0.112285	-0.131441	-0.0473739
cg04634483	-1.2047	-0.440752	-0.305612	-0.686676	-6.33288	-0.12074	-1.66158	-11.6529	-0.148478	-0.77774	-0.300405	-0.14217	-0.137101	1.72519	-0.331596	-0.106446	1.00319	0.493451	-1.67795	2.44186	0.38307	-1.72884	0.0172076	0.938652	1.25759	0.304458	0.21835	0.0713981	-0.249651	1.26784	2.89174	0.0448378	1.17174	0.818524	1.52155	-1.24363	-1.99553	0.602932	-0.034483	-0.190702	2.39355	-1.64859	1.41441	0.779812	-2.52968	-1.12793	0.756746	0.0878904	0.346095
cg09890341	0.110817	0.980843	-0.942642	-0.117164	-1.70108	-1.39667	-1.06945	-7.82298	1.01725	0.388626	0.619583	0.0409461	-0.214226	-0.202402	1.31068	-0.387027	1.08239	-0.276987	-0.78538	0.255677	-0.81608	-0.824904	-1.02546	0.591007	1.14123	-1.19356	-0.370905	-0.785474	2.88633	0.639387	1.37176	-2.59877	1.546	1.14948	-0.242734	-0.750484	-1.32658	1.43742	-0.131336	0.74309	1.90079	-0.83383	-0.183788	1.6223	0.985153	0.949594	0.776518	-0.0274204	-0.0528496
cg20041873	-0.0446319	-0.0981453	-0.439972	1.22148	-2.23225	0.0192818	-0.204259	-6.22564	-0.401124	-0.514568	0.00209241	-0.280264	0.598163	0.482849	0.746906	-0.370399	0.576712	1.6641	1.06698	0.50817	-0.601331	-1.25389	0.626173	1.33795	0.800425	-0.279551	-1.09814	-0.560731	2.25108	0.633744	1.02199	-2.03027	0.442349	0.277942	0.324857	-0.339797	0.347515	1.1845	0.462305	0.483654	0.363176	-1.07102	0.376947	1.52985	0.922121	-1.09776	-0.644571	0.0867251	-1.17866
cg04303139	0.192661	-0.585385	-0.780082	-0.212506	-4.69764	0.685509	-0.990463	-8.93759	0.0792422	-0.490413	-1.27661	-0.438306	-0.244288	0.400737	-0.210124	-0.418576	-1.3272	-0.392143	-0.550268	1.59902	0.0561537	-1.07461	0.387858	0.76464	-0.461067	0.800906	0.38735	-0.473688	4.0018	0.55382	1.54715	0.439811	0.766743	0.122761	1.02621	-0.20113	-1.96243	1.07899	-0.0836436	0.743038	0.792618	-1.58901	1.3773	-0.382927	-1.5509	-0.85512	0.850427	-0.132896	1.53147
cg03436478	-0.64199	1.78745	-0.405343	0.824298	-2.22426	-0.510473	-1.3563	-7.05979	-0.690147	0.394373	0.0317751	-0.0425831	-0.172978	0.534181	1.49054	-0.56592	0.712661	-0.0735073	0.783352	0.309869	-1.00288	-0.927163	-0.328189	1.0356	0.55694	0.396817	0.0941425	-0.143514	4.26467	0.504973	1.90859	-2.58861	-0.634807	0.584331	0.251068	0.0922263	-0.645796	1.41663	-0.216393	1.59898	1.09422	-1.64653	0.13827	0.521396	1.84971	-0.222364	0.643205	0.714594	0.144718
cg05509218	0.308245	0.866472	-0.219937	-1.01395	-4.47549	-1.41929	0.409431	-8.97202	0.188437	-0.257418	-0.739515	-0.405659	-1.27212	0.762342	-0.028483	-0.301121	-1.34308	-0.547694	-0.154135	0.487363	-0.193836	-2.5458	-1.33922	1.05076	0.854918	0.231446	-0.900388	-1.01916	3.53673	-2.42283	2.24081	-1.80082	0.877874	-1.58678	1.6477	-0.623207	0.438698	0.872837	-0.520414	-2.72748	2.0724	-3.23189	0.867987	1.28864	1.04696	1.58782	-0.472791	0.669521	-1.05891
cg22924867	-0.0363502	1.7131	0.260124	-0.691161	-2.68334	0.252614	-1.45148	-7.42012	-0.664361	0.0631963	-0.327332	0.0740579	-0.0635158	0.278662	0.59871	-1.07936	-0.401265	-1.13248	-0.160225	0.437039	-0.807883	-1.51429	-0.746782	1.8491	0.378881	0.190453	-1.20678	-0.842402	5.9477	-1.95475	1.82121	-0.217752	0.0257944	-0.595658	1.3798	-0.930301	-0.898508	1.83022	0.00552796	-1.79854	1.15725	-2.24832	0.363784	0.367735	1.24368	2.28896	0.593036	-0.868236	-0.641411
cg01169624	-1.98973	1.04771	-1.90541	-2.14169	-2.35444	-4.03598	-1.68808	-7.68745	-1.99974	0.66453	-4.28435	-0.281939	0.12435	-1.32158	0.520031	-0.900548	-1.4437	-1.73555	-0.834117	-0.0896526	-1.3245	-1.48056	-1.01338	-0.533244	-1.53242	-2.71235	-2.4812	-0.874275	0.324128	-3.16069	1.11166	-0.679876	1.16302	-2.76958	-0.445727	-1.28247	-3.61374	0.340633	-0.168207	-3.73444	1.5514	-0.449815	0.527284	-3.58033	-1.52853	-0.741913	0.553651	-0.351812	-1.83848
cg03682823	-0.865107	-1.55657	-0.918234	-0.741241	-3.53821	-1.7145	-1.29922	-8.88918	-0.603493	-0.748804	-2.08558	-0.935956	-0.377251	-0.434501	-0.571323	-0.397427	-1.59351	-1.32266	-1.5205	0.149701	-1.11696	-0.989563	-0.150494	-0.367068	-0.543158	0.930807	-0.693258	-0.80292	1.05258	-0.801627	0.540657	-0.838077	0.387937	-0.0450007	0.790116	-0.595063	-1.4824	1.2767	0.0656212	-1.77215	0.525459	-1.91393	0.710745	-1.68222	-3.16328	-0.0145106	0.206708	-1.20977	0.0497395
cg18139769	0.916936	-1.27563	-1.00143	-0.116555	-4.9775	-1.30153	-1.77809	-11.6703	0.362074	-0.864205	-2.75205	-1.45013	-0.942044	0.209997	-0.550135	-0.487269	-0.139511	-0.992953	-0.430584	-0.261302	-0.209163	-1.48451	-0.0350393	0.400448	-0.347467	1.04625	-0.169685	-0.354192	1.00474	-1.32739	2.18789	-0.463913	0.0847243	-0.706839	0.675909	-1.10557	-1.58194	0.718574	1.0744	-0.638826	0.228209	-2.03436	0.591741	0.211215	-1.45545	-0.0745012	0.648791	-0.711985	0.642608
cg12397924	-0.720701	-0.326237	-0.482965	0.891857	-3.20414	-2.22733	-2.56311	-5.27206	-0.353125	0.574164	-1.87556	-1.48367	-0.0296677	1.2595	0.48914	-0.430139	-1.64935	-0.099956	0.721747	0.154642	-0.32143	-0.407877	0.897812	1.89472	-0.557291	1.54157	0.257394	0.484051	-5.84345	-3.23893	1.61936	-0.56222	0.689173	-0.768829	0.500237	0.176656	-1.43914	0.869524	1.18823	-3.13991	0.653474	-2.5317	1.79563	-1.35603	0.880888	4.93185	-0.116461	-0.673561	-0.419151
cg15696408	0.111954	-0.512628	0.254491	-0.122833	-2.42222	-2.14777	-0.598916	-2.52558	-0.113736	0.673118	-1.07533	-0.658318	0.150975	0.417186	0.965138	-0.334737	-1.04889	-0.306739	1.60532	1.3695	0.969544	-0.442959	0.418557	2.4665	-0.0383026	1.12809	0.71642	-0.0246483	-0.0670426	-1.87025	1.5518	-0.689169	0.775718	0.0876219	0.418978	0.00107927	-0.360366	0.305371	0.926988	-2.44295	-0.162105	-1.43027	1.81036	-1.13559	1.61651	5.04336	1.23197	0.199705	-0.934089
cg22820921	-0.090473	-0.384015	0.60465	-0.144868	-3.63129	-2.65509	-1.94072	-5.80586	0.457387	2.79079	-2.43783	-0.475249	-0.513891	0.753593	0.887034	-0.382771	-1.73237	-0.296525	0.430952	1.27135	0.998531	-0.143996	0.662542	0.973978	0.759027	1.92508	-0.0211275	-0.00767352	2.43	-2.79126	1.69611	-0.486693	-0.0723888	-0.326601	0.105907	0.101782	-1.1329	0.737827	1.26908	-3.44927	0.497471	-2.09289	1.17987	-0.792231	0.061362	5.37428	1.3116	-0.251535	0.294929
cg10473158	-0.207038	-0.28511	0.175621	-0.870945	-5.66143	0.880943	1.66463	-2.96023	0.530609	0.497576	0.199179	-0.183259	0.0821926	-0.323336	0.88698	-3.9922	-0.0563736	-0.967332	-1.11213	-0.782573	-0.226057	-0.854734	-0.742729	-0.20842	1.16401	-1.92563	0.487406	-1.93762	-1.59468	1.00826	0.7747	1.38984	1.01005	-0.21573	-0.0572355	-0.772004	-0.240256	0.0171313	-2.12697	1.09703	-0.281306	-1.76628	-5.62952	0.115372	-3.25199	-3.25148	-0.833263	-0.792307	-0.433264
cg05222671	-1.18586	0.290076	0.844501	-0.141515	-5.64872	0.485341	-0.704748	-1.88422	0.480352	-0.465328	1.36573	0.870594	0.222852	-1.38832	1.11647	-3.60027	0.878428	-0.648902	-0.367125	0.560045	-0.563808	-0.846969	0.492881	0.154417	1.54964	-0.903019	0.543368	-0.539628	-0.164474	1.20468	-0.999739	0.048169	0.659654	1.06746	0.87811	-0.938414	0.504741	1.26736	-1.28602	1.0273	0.725563	0.192979	-3.03613	0.56855	-0.605128	-4.21079	-0.619893	0.309981	-1.1747
cg10767216	-1.04534	-0.939575	0.502118	-0.53786	-5.89749	-1.17107	0.172869	-4.50432	0.0391363	-0.262724	0.589454	0.0589266	1.49571	0.154631	1.00573	-4.14005	0.376294	-1.45202	-1.43689	-0.762877	-0.0158207	-0.000820009	-0.472902	0.169228	0.774641	-0.149367	0.248702	-0.0548986	-0.456645	-0.539796	0.0546677	0.624468	0.663942	-0.65949	1.18395	-0.695867	-0.407164	0.0327844	-0.111626	1.40952	0.949946	1.18015	-5.57222	-2.97249	-1.83641	-2.71627	-0.808469	-0.228974	-0.514733
cg12070022	-1.31852	1.07547	0.31274	-1.17995	-3.00847	2.78562	0.734503	-0.861345	0.29135	0.574062	1.92902	1.00925	1.10567	0.895746	2.09335	-2.72269	-2.85416	-0.160419	-0.343946	1.09362	0.144799	-0.396937	-0.47695	1.09828	1.56723	0.615963	-0.269317	0.106305	-1.63706	0.11566	0.732187	0.261878	0.0960182	0.803424	1.10888	0.124333	0.447204	0.553127	-0.942793	-0.517074	0.566074	1.00692	-0.821472	0.157687	-1.48912	-2.23341	-0.529791	0.931961	-2.33819
cg02756856	-0.217496	1.29366	-0.256444	0.575257	-3.08281	1.23141	0.67033	-1.76915	0.37028	-0.682303	0.711461	-0.964598	-0.705458	-0.0039509	1.2388	-4.82595	-1.118	-0.757689	-1.26405	0.581053	0.107416	-1.36676	0.285036	-0.00793348	0.409801	-1.83815	-0.332513	-0.865861	1.69406	-0.268221	1.14686	0.231687	0.342409	0.987222	0.944444	-0.928094	-1.96467	1.09775	-1.30887	-0.274641	1.13723	-0.308852	-2.76143	1.2038	-0.58837	1.39209	-0.41168	0.0230132	-2.8282
cg26275543	-1.40701	0.680099	0.341546	-2.07895	-5.8586	-0.0606914	0.179284	-4.28762	0.260486	0.429335	0.239119	-0.347503	0.42696	-0.733875	1.3938	-4.6086	0.252528	-1.56755	1.62742	-0.154529	-1.60806	-1.09948	-0.0218052	-0.231463	1.97773	-0.651647	-0.663238	-1.05849	-6.30655	0.442996	-0.224637	-0.200142	0.455798	1.71782	0.045182	-1.48671	1.67921	0.983258	0.043962	1.88595	0.46588	-0.872795	-6.71638	1.28134	0.0305705	-3.58996	-1.06279	-1.21865	-0.181026
cg20826277	-1.7512	0.781103	-0.155526	-0.152225	-5.6529	0.117286	-0.160267	-1.74271	0.563618	-0.0145124	1.64253	-0.283019	0.54344	-0.183803	1.34296	-3.37974	-0.669508	0.752404	-0.674031	1.84992	0.253448	-1.19047	0.523431	0.788048	0.463467	-0.487168	0.364025	-0.0291812	5.13018	0.662487	0.232536	-0.457399	-0.0250862	0.0122193	2.10975	-0.474547	-2.90661	1.41009	-0.595875	0.817245	0.824947	-1.67727	-3.91904	2.87493	-2.46614	0.663497	0.490928	1.72883	-0.85789
cg14584935	-0.806992	0.899871	-0.827791	-0.685223	-4.917	-2.18577	-0.330018	-2.6564	2.02235	-0.264533	0.740907	-0.0787177	-0.68173	0.57428	1.15568	-4.72266	-0.794006	-0.530696	-0.904752	0.334339	-0.215514	-0.9028	-0.0230666	0.690666	1.06488	-0.830489	-0.817502	-0.561256	4.7348	-0.367044	0.622601	0.228641	-0.470004	0.208594	0.761761	-1.18797	-2.14801	0.728208	-0.501053	0.813538	0.37204	-0.983916	-4.08296	0.036119	-1.955	-1.3948	-0.596488	0.110067	-1.43649
cg24941047	-2.41501	0.606786	-0.682648	-0.624043	-7.77413	-1.99579	0.670507	-6.13422	-0.251187	-0.353813	-1.51289	-0.146974	0.993342	-0.311981	1.38826	-5.96119	0.490123	-1.48261	-0.169854	0.52337	-1.49927	-2.16423	0.809753	0.946454	-0.151436	-1.08229	-3.23725	-0.193951	-1.66712	0.177298	-1.38141	-0.36023	0.0114422	1.47082	-0.145485	-3.8097	0.776028	1.06881	1.15258	-0.474198	0.384037	-1.16133	-7.30947	-0.79844	0.84538	-4.82076	-2.90673	-1.31372	-2.09359
cg02501418	-0.674047	0.968901	-0.378849	-1.81048	-7.85264	0.742379	0.397237	-5.35426	0.18828	0.363577	-0.961345	-0.698501	0.668437	0.269441	1.67038	-7.43678	1.1821	-1.4037	-0.67312	1.41089	-0.415383	-1.73525	-0.832683	1.3341	-1.38416	0.00759515	-2.16213	-0.235106	-5.2826	0.00217008	-0.738541	1.04708	1.45816	0.868371	0.0320543	-1.81394	0.996529	1.32573	0.718541	-0.755359	-0.0282732	-0.328822	-7.69049	0.601941	0.386811	-2.34642	-0.813295	-0.603711	-1.68841
cg08229366	-2.06045	0.535912	0.237316	-1.26619	-5.18315	-1.81205	-2.051	-4.1876	-0.294539	0.287871	-0.147137	-0.659747	0.742675	0.425667	1.8426	-5.79615	0.177621	-2.35499	-1.41941	-0.0828019	-1.31279	-1.39708	1.01826	-1.27157	-0.443353	1.10397	-1.43505	0.92775	-3.32827	-2.40079	0.621483	0.665184	0.474823	0.770622	-1.1656	-1.44756	-0.198779	1.05117	0.23418	-3.08504	1.46913	-2.3662	-6.30736	-2.23548	-2.21705	-2.7134	0.591952	-1.65596	-1.59271
cg07224147	-0.852918	0.0222782	0.383859	-0.858211	-4.71616	-0.0133335	-0.482488	-4.46653	0.0952443	0.754797	-1.05082	-0.57573	0.374027	0.910607	1.26885	-5.06038	0.653448	0.174477	0.718038	1.06642	0.194203	-1.68691	0.191481	2.67043	-1.36646	0.716772	-0.95621	-0.314699	-2.29502	-0.324212	0.672347	0.399458	-1.68763	0.748921	0.435431	-1.15303	2.29255	0.723215	1.12162	-0.047859	1.18007	-2.21488	-5.22061	-0.518044	-2.36439	-1.98881	0.193308	-0.584569	-0.715925
cg27417677	-0.191105	0.649395	0.454181	2.65879	-4.87364	1.44305	0.171082	-5.05714	0.505583	0.480717	-0.173234	-0.373075	0.0339282	1.12757	0.285356	-5.28303	2.25348	3.31711	1.57796	0.735743	0.206598	-1.02162	0.0254997	4.07786	0.997041	0.813202	0.0572903	0.332855	5.3164	-0.15397	1.01899	-0.430015	0.363307	-0.00594306	1.01816	-0.357736	-3.90102	0.774808	-0.117093	2.20348	0.0282777	-3.07432	-6.46308	2.65191	1.5683	2.81186	-0.438863	-0.113697	-1.20755
cg09003373	-0.465924	0.606882	0.320095	-0.617887	-3.63506	0.771888	-1.63532	-2.976	-0.0860976	0.525115	0.105684	-0.586023	0.362419	0.0388517	0.749585	-3.27791	-0.45562	-0.75014	-0.14498	0.654422	-0.646486	-1.06764	-0.44292	1.12794	0.1253	-0.0162591	0.0561384	-0.69689	-2.17154	-0.0783388	1.07433	0.366468	0.312361	0.866338	0.251558	-0.730016	-0.53584	0.566887	0.174736	-0.506776	0.266887	-1.68858	-3.99223	5.38077	-0.354736	2.01858	0.432196	-0.274179	-0.194454
cg14088957	-0.317727	0.336985	0.210582	-1.1285	-2.84293	-0.326686	-1.47016	-2.52836	-0.0706039	0.435435	0.0491235	-0.908646	0.98648	-0.670492	0.381482	-2.75863	0.586043	-0.782142	-0.576184	0.199032	-0.532771	-1.16764	-0.234187	0.49029	0.404064	0.114081	-0.172475	-0.504818	-2.61139	0.210508	0.495584	-0.0882461	0.899643	1.12825	0.0708935	-0.548545	-1.79093	0.932287	-0.134422	0.0589674	-0.20534	-1.34779	-2.68622	-0.28121	-0.842322	1.74937	1.3364	-0.355536	0.0132935
cg06100421	-1.11481	0.515985	-0.0349248	-1.19969	-3.4431	-0.466826	-1.64118	-3.36982	-0.663354	0.208039	0.444959	-1.14263	0.664942	0.0994993	0.618675	-3.94107	-1.23416	0.117083	-0.632646	0.557377	-0.833506	-1.53136	-0.662938	0.711063	0.333519	0.368894	0.0247547	-0.0654446	-3.07938	-0.971825	0.727481	0.129859	0.893836	1.13497	0.228231	-0.0494905	-0.812282	0.501804	-0.439763	-2.40078	0.766419	-1.10927	-3.72029	-1.35692	-0.633802	3.16277	1.12079	0.00359311	0.212713
cg20297423	-0.537231	0.117336	0.79202	-0.0429639	-4.91527	-0.584006	-0.975449	-4.63186	-0.515152	0.690482	-0.0818826	-0.509922	0.903405	-0.140923	1.22716	-5.56297	-0.321403	-0.996846	-0.517613	1.661	-0.95379	-1.49199	0.205565	1.18995	-0.18304	-0.0696263	0.200856	0.294468	-3.81536	-0.601947	1.2875	-0.151075	1.23691	1.36694	0.529656	-0.931222	-0.100249	0.300212	1.24239	-1.89845	0.745922	-1.18241	-5.60969	-1.50681	-1.13095	4.34054	0.935014	0.381359	0.303609
cg05369791	-0.844372	0.380864	0.754057	-0.224183	-7.15159	-0.372619	-1.18322	-5.66856	-0.18148	1.3896	-0.130296	-1.52021	1.40166	-0.356271	0.546998	-7.47222	-1.7606	-0.340285	-0.618461	1.32134	-0.354024	-1.27571	-0.0986049	0.126966	1.65027	-0.0843648	-0.104688	0.173627	-0.227514	0.00609858	1.10343	-0.0857033	1.02918	1.62464	0.281181	-0.0043272	-0.285575	0.562454	-0.356818	-1.40207	0.491823	-0.532678	-7.36681	-0.848521	-0.824075	1.63606	1.72384	-0.497546	0.858782
cg13917504	-0.496006	-0.334727	-0.27361	-1.43196	-6.52039	-1.00238	-1.08812	-4.77741	-0.123166	-0.684438	-0.797453	-0.206083	0.761628	-0.0857957	-0.0415092	-6.1593	-3.13108	-0.64648	-1.37368	1.39226	0.160247	0.158486	0.241965	-0.0845983	0.845374	0.406841	-0.1857	-0.0205879	1.56771	-1.46074	0.788056	-0.368215	0.28287	-0.28384	0.777095	-1.09359	-2.16256	-0.0820452	0.25448	-0.49621	0.827572	-1.40216	-7.38755	-0.753376	-1.69248	-3.06575	0.0372582	0.302117	0.320673
cg25407198	0.0630063	-0.246679	-0.197462	-1.37472	-6.93587	-1.25947	-1.16254	-6.07132	0.490022	-0.0204923	-0.740413	-0.292189	0.223861	0.257757	-0.051046	-7.13226	-4.01307	-0.0197221	-0.818256	1.26479	-1.20034	0.465698	0.466002	-0.650797	0.775847	0.578662	1.38834	0.491744	-1.87114	-0.917363	1.20767	-0.166551	1.25253	-0.55556	1.38762	-0.262737	-2.83407	0.68318	-0.421778	0.857203	0.293278	-1.5817	-8.25495	-0.413216	-1.55437	-3.00303	-0.266926	-0.407157	0.084473
cg21667116	-1.45075	0.0600105	0.116088	-1.08991	-5.38771	-0.289679	-1.40769	-4.33049	-1.07331	-0.348848	0.0371392	-0.386371	0.541626	-0.579399	0.275074	-4.81104	0.0604666	-0.413141	-0.511389	0.357663	-0.76463	-1.30057	-0.903168	0.555734	1.12363	0.207222	0.608724	-0.48712	4.70048	0.40356	1.012	-0.574645	1.58601	1.33721	0.0420775	-1.01695	0.223129	1.14231	-0.14214	-0.191817	-0.299348	0.152128	-5.6458	0.350072	-3.09912	1.93877	0.483703	-0.949688	-0.271068
cg23156962	-0.653417	0.842088	-0.302574	-0.650734	-4.52382	-0.203686	-0.508205	-3.96837	-0.30916	-0.310392	0.157476	0.060436	0.827611	-0.25882	0.246645	-4.71597	0.041873	-0.37812	-0.080764	0.537312	-0.524883	-1.29308	-0.466723	0.98848	0.884541	0.348818	0.0112545	-0.751798	4.93208	0.471566	0.574098	-0.909036	1.01904	1.06272	0.288093	-0.747007	0.543811	1.18051	-0.243111	0.853311	0.149138	0.43792	-4.93742	-0.812738	-2.65717	2.4856	1.10277	-0.141382	0.296936
cg17079325	-0.0238178	-0.776908	0.99483	-1.19108	-11.6909	-1.65171	-1.11149	-6.76381	0.5634	-0.810124	-0.297862	-1.05309	-0.294035	2.61096	-0.183046	-7.65384	-2.51578	-1.07881	-0.650843	1.88017	-0.207933	-1.22783	1.67824	-0.199521	0.732222	-0.00805857	0.310176	0.819403	1.98484	-1.70749	1.46499	-0.438035	0.241596	-0.054452	0.342174	-0.976063	-2.66565	-0.946212	-0.027479	0.27596	1.26711	-2.6258	-14.8889	-0.702309	-3.30209	-3.49744	-0.516732	-0.0645898	-0.56474
cg04344875	-0.371153	-0.610632	0.012825	0.151063	-12.0323	-1.55904	-1.01579	-6.93006	0.910672	0.0454985	-0.93823	-0.635016	0.156744	0.928162	-0.668738	-8.10806	-3.00152	-0.635499	-1.04322	1.96984	0.453113	-0.931955	1.27722	0.655198	0.740007	-0.307981	-0.0781539	0.120264	3.68607	-0.562627	0.681259	-0.636877	0.0803774	0.67268	1.64882	-1.85052	-3.2033	-1.14425	0.739607	1.10786	-0.0714746	-2.74046	-15.6617	-0.112367	-3.35833	-2.36898	-0.348117	-0.626285	-0.861157
cg00286878	-1.90967	-0.796961	-0.317088	-0.981859	-7.60489	-0.867668	-1.78466	-7.03157	-0.0506822	-0.194468	-1.20017	-0.691936	0.11639	0.307092	-0.877132	-7.13096	-3.28909	-2.19829	-1.76417	0.926625	-1.65611	-1.3166	-1.15676	0.509841	0.302763	-0.570145	-1.162	0.465559	-0.763144	-0.693787	1.36841	-0.40357	1.1648	-0.86839	0.376446	-1.07252	-3.71309	-0.30022	0.810686	0.847764	1.01581	-2.38974	-9.28473	-0.471769	-3.33084	-2.33787	-0.888412	-0.531567	-1.00695
cg12347392	0.506104	-0.394499	-0.808565	-1.35897	-4.18411	-0.437919	-0.47476	-4.59293	-0.20761	-0.751867	-1.14674	-1.17065	0.46657	0.532739	1.06854	-4.8949	-1.77316	-0.266328	0.0988317	0.0622644	0.379329	-1.88827	-1.27205	1.33672	-0.731984	0.323205	-0.561338	1.22805	1.22885	0.440683	-0.481894	-1.38849	0.347128	-1.77021	-1.32343	-0.685953	0.189338	1.44357	-0.327106	0.949145	0.258144	1.06898	-5.07953	-0.480531	-1.67252	-3.44494	0.847933	-0.801913	-0.39771
cg04786207	-0.151596	0.576494	-1.00375	-1.17666	-6.62624	-0.924015	-1.37844	-6.21315	-0.337182	-0.362961	-0.73889	-0.709543	0.987266	0.614791	0.204059	-6.60414	-0.551401	-0.676389	0.371519	0.113756	-0.648176	-1.73541	-1.15719	1.29974	-0.726109	0.0766923	-0.762148	0.272931	1.07447	2.23965	-1.01474	-0.605819	1.82434	-0.741822	-0.969316	-1.73033	1.20477	1.75157	-1.05215	1.63868	-0.542911	0.430722	-7.06341	-1.59636	-1.51706	-2.90075	0.912457	-0.57047	-0.899732
cg19386484	1.38188	-0.612698	0.335621	-1.03708	-4.11423	-2.43119	-1.04065	-4.3897	0.999266	-0.415455	-1.0825	-1.28458	1.90376	1.44528	1.75164	-4.56013	-1.61392	0.419654	0.598531	0.912267	0.577832	-1.05913	-1.29847	0.564285	-0.893906	0.667311	0.185798	0.486718	-0.723865	-0.0525579	0.593601	-1.30752	0.877483	-2.0295	-1.23905	-0.714171	1.49849	1.89794	0.435997	0.178463	1.3267	1.82345	-4.49145	-2.45359	-0.815024	-1.6519	1.07415	0.497705	-0.60415
cg26708559	-1.52712	-0.441327	-0.416775	-1.97794	-5.62429	-0.75035	-1.58872	-5.30128	0.0306202	-0.300346	-0.717895	-0.664599	-0.184259	-0.84823	-0.435005	-5.19147	-3.21369	-1.5282	-1.89569	0.725348	-1.0993	-1.28728	-0.771059	0.287076	0.0264342	-0.573154	-1.05334	-0.0570725	-2.47668	0.332848	1.11507	-0.256772	0.968551	0.0159217	0.70641	-1.20583	-3.90727	-0.105777	-0.316063	-0.472315	-0.129792	-2.3888	-6.64256	-1.08424	-1.57047	-1.74044	-0.363667	-0.46396	-0.526692
cg22705386	-0.104164	-0.930536	0.140279	-2.21561	-6.04118	-2.73759	-1.88518	-4.70816	-0.906664	0.430842	-1.15971	-1.47974	0.52553	0.421188	0.84151	-4.96966	-1.12204	-0.856364	-0.718349	0.522018	-1.08323	-1.37095	-1.43555	0.953901	-0.0938968	0.410877	-1.39273	-0.466029	-2.68014	1.29207	0.876952	-0.784573	0.407834	-0.605738	-0.593959	-1.05467	-0.163108	0.343126	-0.278456	1.97368	-0.282523	-0.238549	-6.00177	-3.36547	-1.02071	-1.38673	-0.830631	-0.951165	-0.910638
cg06212135	-0.490122	-0.232034	0.143727	-2.37683	-6.84609	-2.9813	-1.31615	-5.56138	-0.909748	-0.0495554	-0.555846	-2.97544	1.13406	0.757315	0.999426	-5.22197	-0.729481	-1.25061	-0.734802	0.640401	-0.747996	-1.92501	-0.343636	0.973228	-0.894348	-0.110004	-0.87261	-0.836394	-3.01547	1.25055	0.0542519	-0.924331	0.474899	0.013728	-0.515185	-0.493317	0.346191	0.551843	-0.0725811	0.809194	-0.26102	-1.39727	-7.36556	-2.88871	-0.01511	-1.94611	-0.731223	0.460526	-0.938792
cg10249538	-0.636835	-1.4207	0.326434	-1.87326	-5.32224	-3.47618	-1.04023	-4.57712	0.172249	0.920585	-0.46016	-2.05287	1.7077	1.06371	1.23411	-5.02992	-1.21161	0.404887	0.62916	1.2048	-0.492464	-1.53295	-1.21524	0.327471	0.458786	-0.297059	-0.390971	-0.682293	-3.1857	-0.253887	-0.377912	-0.435877	-0.502436	-0.550763	-0.295017	-1.45691	0.192462	1.08068	0.71278	1.30022	-0.263213	-0.303402	-5.47846	-4.17353	0.724808	-2.51372	-1.77678	-0.277799	-0.971726
cg16823958	-0.581398	-0.440487	0.158023	-2.87954	-8.03696	-3.37488	-1.77567	-5.65074	-1.44846	0.303251	-0.950738	-2.87162	0.831185	0.559146	1.22653	-7.54233	-0.545944	-0.960092	-0.053361	0.290074	-0.237042	-2.34032	-0.833116	1.06668	0.252637	0.71667	-1.4413	-0.99502	-2.49899	-0.43502	0.709639	-0.806629	0.00837013	0.4017	-0.780439	-0.8274	-1.22608	0.260527	0.494575	0.290698	0.603404	-1.00589	-9.82665	-5.59865	-0.378326	-5.7813	-2.02962	-0.667124	-1.71617
cg13104298	-1.88859	0.461375	0.537657	-0.944778	-7.12165	-2.98805	-1.35069	-7.14863	0.173435	1.0662	-0.769437	-2.93239	0.0676146	2.02295	1.3153	-8.43503	-0.586111	0.0651644	0.237855	0.71588	-0.734716	-1.11148	-1.02159	1.15523	-0.841753	-0.374211	-1.6603	1.13028	-0.901073	-0.26826	0.81141	-0.407245	1.65926	0.73697	-0.788486	-1.44919	-1.6575	0.572899	-0.0553043	0.171128	0.719844	-0.959924	-11.1041	-4.95903	-0.391082	-6.56692	-1.77425	-0.493493	-2.05194
cg05556276	-0.694032	0.422596	0.61806	-1.84828	-6.00893	-3.59021	-1.85543	-5.16222	-0.769885	1.24902	-0.893286	-1.31051	-0.0342832	0.313649	1.99347	-8.7757	-0.45713	-0.0273752	-1.05972	0.433148	-0.0268296	-0.406074	-0.567746	2.0257	-0.0411671	0.0903842	-1.93629	-0.0606882	-3.01308	0.823819	-0.24503	-0.748317	0.0538076	0.371698	-0.39934	-0.141711	-2.449	1.73365	1.18334	-0.343773	1.00647	-0.653793	-12.714	-3.12386	-0.906813	-5.48407	-1.06826	-0.654955	-1.61003
cg17580798	-0.602209	-0.099879	0.771647	-1.31653	-4.89856	-2.2147	-0.58795	-4.50078	-0.659057	0.778697	0.0263874	-1.34774	0.020574	0.29722	0.697374	-5.95682	-0.102489	-0.723762	-0.367402	1.04271	-0.568197	-1.08805	-0.0471784	0.871339	-0.793316	0.874823	-1.84196	-0.460651	-3.56314	0.364325	1.25549	-0.65058	1.13514	1.07105	-0.294124	-0.205002	-1.39746	0.762414	0.743777	-0.027821	1.14874	-0.986657	-8.18867	-2.55759	0.331559	-3.30596	-1.60733	-0.407974	-0.47086
cg27589003	-0.340104	0.927244	0.911298	-0.846841	-3.33047	0.10181	-0.164039	-2.9037	-0.341845	0.481109	0.615881	-0.332929	0.936961	0.176195	0.748246	-3.62916	-1.16309	-0.608139	0.0254025	1.41705	-0.0804983	-0.822265	0.00588839	1.65846	0.356686	0.487904	-0.762488	0.751202	-0.722608	-0.084265	1.0524	0.554892	1.08277	1.03185	0.805268	-0.804007	-1.64922	0.23234	1.23643	-1.90798	0.897033	-0.790559	-4.47357	0.117779	-1.76734	-1.85055	0.588415	0.844196	0.126069
cg21200654	-0.459433	0.163301	-0.106244	-2.2906	-6.06734	-0.607269	-0.915019	-4.18416	-0.302644	0.0428806	0.199581	-0.780688	0.049054	-1.02107	0.450335	-5.17928	-1.92706	-1.50453	-1.56793	1.23759	-0.829075	-0.343239	-0.702101	0.686475	-0.0483093	-0.443619	-1.4424	0.221999	-0.47175	-0.708859	0.85052	0.732966	0.493942	0.481394	0.226268	-1.96238	-2.80005	-1.00502	0.175633	-3.41835	-0.153984	-1.93586	-7.28634	0.848249	-3.20709	-1.6552	-1.54887	-0.011984	0.488268
cg25519926	-1.46298	-0.0582493	-1.33499	-1.896	-10.5799	0.390923	-0.498611	-6.24011	-0.399024	-0.469156	-0.850381	-1.07243	0.123332	-0.215375	0.244881	-7.89511	-2.52306	-2.24731	-1.7743	0.805091	-1.22881	0.0124964	0.112929	1.43727	-1.11639	-1.59576	-1.27529	0.523318	4.46584	-1.46113	0.348158	0.660002	1.20368	0.519589	-0.575559	-2.22121	-4.92837	-1.63081	-0.606314	-3.31406	0.742008	-1.963	-10.4492	-0.715481	-3.40697	-4.36289	-0.130149	-0.309156	-0.283985
cg09462536	0.257085	0.614618	-0.248551	-0.881359	-3.83863	-2.36362	-0.773074	-2.5534	-0.874947	0.286105	0.106578	-0.518259	1.34508	0.283077	-0.281603	-3.29292	-0.91581	-0.404842	-0.599948	0.140973	-0.828699	-0.34124	-0.641393	1.29409	-0.0694465	0.311499	-1.00032	-0.30338	-1.05096	1.72499	0.955279	-0.33975	0.644023	2.06018	0.724986	-0.295928	-1.77868	0.502277	1.08897	-2.58398	0.401153	-0.118243	-4.43562	0.429804	-0.0696567	0.600639	-0.39083	0.151	0.860186
cg22592140	-0.0341322	1.27404	-0.113868	-0.805953	-5.51305	-2.90723	-0.842143	-3.76507	-0.631269	0.601037	0.0331571	-0.904517	0.899107	-0.321135	-0.0434167	-5.49884	-1.13128	-0.386092	-0.890544	1.27822	-1.06353	-0.948435	-1.88689	2.23705	-1.05471	-1.19434	-1.97637	-0.074961	-0.72685	1.81164	2.02961	-0.2286	1.37046	2.07883	0.589993	-0.888452	-3.60486	0.240148	1.39441	-3.26463	1.58294	0.0741097	-5.81623	0.127861	0.660801	-1.16199	-1.23639	0.987584	-0.233455
cg03588221	-0.687954	1.11158	-0.512671	-0.333627	-10.1072	-0.208771	-0.539587	-8.21795	-0.963085	0.23631	-1.81491	-0.841989	-0.0193507	0.17003	0.988052	-8.98151	-2.39285	-1.24977	-2.15518	1.33447	-1.02999	1.22665	0.346249	0.0599672	-0.222245	-0.0131883	-2.0105	1.04971	8.35866	0.787461	2.42709	0.751606	1.2273	1.56559	0.671844	-1.49759	-1.42429	-0.565508	0.134613	-3.74477	1.33302	-1.20145	-11.0982	1.39978	-4.87828	1.01515	0.266804	0.319883	-0.227375
cg13986840	0.419995	-1.01173	-0.976922	-0.897005	-2.98846	-1.83765	-0.385072	-0.236446	-0.614426	-1.04232	0.175754	0.00809322	0.425008	-1.07568	-0.284898	-2.26782	-1.9692	-1.32148	-1.31436	0.23198	-2.07207	-0.829731	0.176315	2.4027	-1.3744	-0.500616	-2.00062	-0.827757	-3.53482	-0.291441	0.990726	1.39963	0.142539	-0.0452871	0.630928	-1.76141	-1.63308	-0.982049	0.427228	0.800518	0.72071	1.56952	-3.43904	-1.68307	1.88823	-0.431577	0.843596	0.28246	0.554676
cg23312013	0.378951	-0.459845	-0.0437183	0.248324	-3.81826	-0.316629	-0.91385	-1.94015	-0.576772	-0.989667	-0.695001	-0.328826	0.331456	-0.803182	0.508372	-2.93974	-1.69154	-0.762272	-0.890654	0.0075219	-1.01288	-0.555654	-0.384975	0.819608	0.596226	-0.431521	-1.49058	-0.00352585	-1.99243	-0.359972	0.725665	0.773148	0.479562	0.0791585	0.6402	-0.860196	-0.656066	0.515436	0.269392	-2.16723	0.115806	-0.427796	-4.92224	-1.28982	-2.95804	0.0115299	-0.345219	-0.291744	-0.486274
cg14952237	1.92281	0.448462	-0.517909	-0.622838	-5.80243	-1.38212	-0.880878	-2.14611	-1.18226	-1.14707	-1.58933	-1.10491	0.359752	-0.701619	0.727207	-2.96835	-2.24386	-1.85435	-2.25845	1.3123	-1.83149	-0.727207	-0.239753	1.81801	-1.49415	-0.684189	-1.0053	-1.06925	-4.18018	-0.00913352	0.506841	0.695443	0.731509	0.00190508	1.22442	-1.71076	0.669589	-0.162595	-0.58326	-3.26376	0.0865993	-0.3139	-5.93582	-0.0462222	-0.0714162	1.51005	1.13269	0.110097	-0.565495
cg05260959	0.362784	-0.387387	-0.647424	-0.217023	-5.57773	-1.1154	-1.53286	-3.16227	-0.529228	-1.67603	-0.418385	-0.235455	1.04652	-1.10019	1.02468	-3.12196	-1.31085	-0.559063	-0.523909	0.625151	-1.51687	-0.337734	-1.0383	1.02171	-0.385767	-0.7065	-1.17065	-0.976253	2.11283	0.965949	-0.0127588	1.62687	0.0469588	-1.77472	1.79685	-0.76492	-0.289047	-0.108293	-0.381531	0.863575	0.353346	0.465114	-6.03718	-1.41865	-4.31472	-0.970591	0.527746	-0.632807	-1.10576
cg12924654	-1.19858	0.910334	0.583701	-1.14861	0.0729167	3.61305	0.708591	0.745198	-1.85252	-0.057707	2.89926	0.578505	3.36668	1.20618	2.50459	0.120373	1.63683	1.1339	1.82983	2.09364	-0.771761	-0.204646	-1.07434	-0.919698	2.30033	-1.07171	2.86527	0.727684	5.4045	1.21799	0.296261	-1.55	2.42738	0.113383	2.23276	-0.70492	-1.98716	2.20693	-1.06265	-0.567059	0.311183	-0.23777	1.42208	2.53551	-0.274287	-0.563638	1.83436	2.78381	0.730559
cg05719902	0.0482961	0.451496	-0.0381629	1.27849	-6.44992	-0.428061	-2.08527	-5.29368	-6.05974	-3.40322	-0.637749	1.70255	1.50005	1.06537	1.56884	-4.37835	-0.0565271	0.526218	0.124172	1.70725	-4.64738	-6.27455	-5.27797	-5.93061	0.462646	-1.61806	0.153074	0.976175	-1.54524	1.03543	0.807421	-0.715532	-2.15656	0.311978	1.70126	-2.85596	-1.42392	0.749093	-1.05614	-3.73882	-0.146701	-3.15079	-5.02475	-2.82076	-2.05266	-0.185465	0.103622	0.703169	-0.511231
cg25780543	0.583577	0.122388	0.195542	-0.919968	-1.94498	-1.92949	0.132513	-3.46628	-0.302604	-2.00948	-0.215972	1.14826	-0.0612732	-1.67846	0.302324	-0.505189	-1.00189	-1.30277	-0.0465014	0.0540516	0.861595	-1.91681	0.492307	0.284873	0.187755	0.405729	-0.391827	-1.53067	-2.95782	0.0537012	2.28526	-0.436536	-0.238843	1.15906	2.17147	-1.69527	0.81969	1.18924	-0.715854	-0.0559728	0.404973	0.500158	-1.10516	-4.78534	-1.2122	-0.844004	-0.985116	-0.344149	-0.360086
cg25058023	-0.805142	-0.685061	0.655561	-0.0065504	-0.151058	-2.47105	1.26555	-1.27239	-0.472135	-0.293801	-0.0919149	-0.000826098	-0.269816	0.661515	1.24172	0.182632	-1.85779	-0.953724	0.663822	-0.224317	0.18833	-4.38089	1.68373	1.96647	0.809897	-1.65616	-0.932416	-2.62835	2.376	1.06198	0.157423	-0.446913	-1.0424	0.679095	0.153508	0.160238	0.144478	1.73762	-1.05402	-0.0269938	-0.148554	-2.37985	-1.34561	-3.97267	-2.69277	-1.021	-0.104341	-0.737053	-1.46825
cg03024742	-1.06003	2.26576	1.30946	0.30439	-3.24546	-1.37114	0.669528	-0.055869	0.699913	-1.45403	-2.58319	-1.09115	-2.16118	-0.532303	1.08703	-0.668647	-0.0941225	-0.382252	-0.854485	-0.737078	-0.732388	-3.93397	2.9545	0.454259	-0.718317	-1.28285	-2.9353	-2.87801	-8.48159	-0.868578	1.62951	-2.0222	-0.192436	2.34318	0.70498	-2.09732	-0.160089	1.37702	-2.9625	-2.22112	-0.374081	-0.844865	-0.720924	-6.46075	-4.25576	-7.03038	-2.63718	0.122863	-0.951395
cg10538202	0.78074	2.9045	0.450168	-0.183659	-0.393518	1.65089	0.42643	-0.464219	-0.930595	0.0706315	-0.434491	-1.56972	3.1801	1.58057	-0.53658	2.08692	-2.13762	0.0814634	-0.394985	1.1779	1.07691	-1.58701	1.26238	0.616455	-0.00935372	-0.0876403	-0.249198	-1.25169	-3.87046	1.38719	-1.75412	-0.518334	-0.367853	1.48814	0.0915153	0.173658	1.29116	1.57533	-1.98495	-4.83281	-1.15697	1.55443	-2.32454	-4.18088	-0.266376	-3.60343	-3.18355	0.0181315	0.115021
cg09623773	0.292408	0.442011	1.11546	-0.890924	-0.370737	0.946343	1.2836	-2.45353	1.79669	-1.30486	-1.02422	1.12767	1.25593	-0.098667	-0.00951648	-1.87479	-0.489458	0.940696	0.027734	-0.891159	-1.25678	0.330692	2.33668	0.888918	0.326065	-0.250558	-1.10886	-0.353543	0.791421	-0.92991	-0.141617	0.445175	-1.37389	0.27082	-1.0227	-1.83431	0.53415	0.956467	-0.807915	-0.183699	-1.48912	0.333813	0.282266	-0.857407	-0.329059	-3.14913	-1.81759	0.711869	-1.06183
cg13346869	-2.11051	1.44607	-0.527272	-1.01051	0.907179	-1.75265	-2.21981	-1.40745	-3.11603	-0.595543	-0.905291	0.0534909	1.32183	-1.37932	1.25252	-1.33182	-1.39163	-1.03872	-0.911522	0.312846	-2.03268	-1.32464	-0.953766	-2.26421	-1.31444	-0.198865	-1.49554	-0.8262	1.11884	-0.0424884	0.537983	-1.59308	-0.548471	1.37171	-0.511538	-3.1369	-1.67257	0.764981	-2.48645	1.72354	0.493207	-1.77457	-3.01119	-1.81537	-1.84214	-0.204838	-1.62415	-0.25636	0.35084
cg05020125	-1.09337	-0.202727	0.0850355	-0.416339	-0.640153	-2.98165	-2.99399	-1.96394	-3.66904	-0.318414	-0.668512	-0.18948	1.96318	-0.824151	0.887666	-2.72256	-1.89619	-0.100229	-0.841582	0.353389	-2.16496	-1.62239	-0.205653	-2.87028	-1.02223	0.409856	-1.15057	-0.159124	-3.37889	0.218934	0.818123	-0.56481	0.339151	0.812749	0.0116349	-4.27618	-2.36932	-0.0731781	-3.58547	-2.07611	-0.735325	-0.396575	-4.6715	-3.68778	-1.99186	1.07354	-0.797681	0.0855522	0.892546
cg21505509	-2.02955	-1.29991	0.792364	-3.05945	-1.38245	-4.50686	-5.01976	-3.65515	-5.10354	-1.68233	-2.65173	-1.20351	0.663465	-1.29204	0.653726	-4.23752	-1.21735	-0.0226021	-2.68106	1.83173	-3.34343	-3.25687	0.755617	-4.01748	-0.729541	0.410481	-2.3528	0.32523	4.44745	-2.76645	1.1084	0.473465	0.320506	1.7314	-0.560342	-6.26167	-2.50251	-1.33558	-5.50701	-0.258589	0.353406	-0.926952	-5.36849	-3.0573	-4.64236	-1.81844	-2.89067	0.521517	-0.356573
cg08247852	-1.37018	0.137151	-0.0236541	-0.427083	-1.29646	-4.10018	-2.87378	-3.55734	-5.07199	-1.59931	-1.23324	0.6362	1.08004	-0.88158	0.466495	-3.99873	-0.154791	0.983998	-0.160121	1.37855	-2.20029	-1.63403	0.413348	-3.90492	-0.902439	1.87129	-0.199975	-0.66152	3.9101	0.7136	1.48163	-1.23778	0.559524	1.15964	0.449768	-5.50862	-2.27124	-0.379574	-5.70033	2.47781	0.397438	0.208836	-5.51147	-3.45534	-0.740072	1.57661	-0.00397927	1.19766	1.02579
cg09188212	-0.368357	0.939272	-0.0587862	-0.677058	-3.43494	-0.229915	-0.107237	0.749737	-3.52638	1.36092	2.25668	-0.985784	2.30532	2.39397	2.09517	1.84167	-3.29057	1.86389	1.66983	2.09381	1.36838	-0.0674687	0.0568381	1.30797	-0.970301	2.5534	1.79771	-1.31169	0.161804	-2.92024	1.18575	-0.045358	2.27141	0.39161	1.14128	-3.2808	-0.987709	1.63457	-2.19036	-5.7679	1.45636	-0.949176	1.22025	-0.606079	-5.97861	0.292351	0.720728	2.45403	0.853268
cg00450319	-1.34614	-0.187271	-0.50702	-1.2271	-0.809973	-3.39981	-0.0141301	-0.178276	-3.94098	-0.0709887	1.04704	-0.969521	1.31182	0.688706	1.6665	0.608212	-2.72205	0.966613	1.27011	1.83536	0.428093	0.37182	-0.334282	-0.729094	0.0695222	0.698476	1.23743	-0.113142	-5.47556	-0.418745	1.11082	0.213918	-1.33526	0.491638	0.437932	-4.67326	-3.84653	0.0811986	-3.85494	-3.32792	1.98059	0.134658	-2.52951	-0.756483	-4.7024	1.74302	-0.626365	1.87317	1.49227
cg21926091	-1.13389	-0.504579	-1.16537	-0.542897	1.98695	0.822142	-0.0279045	0.517057	-1.30031	0.471066	-1.62687	-0.693647	0.271238	-0.363198	0.232093	0.904974	0.836822	-0.203029	-0.351426	-0.112102	-1.38885	-1.25036	-0.511771	2.85001	0.679028	0.119613	1.34687	0.13655	-0.341708	0.571584	1.07439	-0.055026	0.99155	0.470413	1.6811	-1.01711	-2.41563	1.94173	0.140324	0.512277	1.23416	0.403206	1.43101	2.66769	-1.76411	3.17279	-0.141485	-1.08095	0.397884
cg22502459	-0.924545	1.20793	-0.781071	0.544756	1.32912	-1.37932	-1.83459	1.5315	-1.48104	-0.479367	0.745353	-1.05642	1.21286	-0.306616	0.688767	1.08172	-0.492164	-2.07385	0.692924	0.690912	-0.839248	-0.803695	-1.95096	0.806806	0.99888	-0.131735	-0.737785	0.988172	6.7437	2.07232	1.99629	1.32317	2.3872	2.57202	0.943736	-0.902929	-4.64097	2.77302	0.216066	-2.00305	2.6456	-0.184492	2.00497	2.25401	1.10746	1.81868	-0.63053	-0.332041	0.731215
cg13713522	-0.650922	1.75402	0.245774	1.00739	2.31329	-2.78538	0.209027	-0.139145	-0.74083	0.548076	0.121561	-0.696809	0.756067	0.530298	1.08609	-0.0577106	-0.805791	-1.5351	0.562887	0.429297	0.285989	-1.25835	-0.543914	2.34616	1.46365	-0.275191	-0.346705	1.28646	4.08294	1.18107	0.0450254	0.932382	1.38957	0.939184	0.564747	-1.32929	-4.67508	1.3404	-0.107604	-2.7604	1.41372	-1.26887	1.05754	2.28919	1.17068	0.221902	-0.420523	-0.692867	0.399998
cg07878171	0.971856	0.96618	-0.0229885	0.0284856	1.70095	1.21369	-0.876244	0.211601	-0.796991	-0.377174	0.780482	0.621795	1.3216	-0.409085	0.259184	0.46229	0.318468	-1.31798	-1.21473	1.44745	-0.995975	0.0521696	-1.91554	0.519784	1.0368	0.342702	-0.353317	-0.0214866	1.28132	3.7073	1.74735	0.893061	2.27731	1.28785	0.70288	-1.19526	-0.353778	1.36111	-0.288948	-0.0753401	0.197016	-1.48885	0.428334	-0.44677	-2.07022	2.23452	-0.435889	-1.33648	-0.174865
cg03803002	-0.558803	1.27137	-0.414353	-0.101839	2.42174	0.719813	-0.120524	1.15057	-1.28043	-1.04415	0.500399	-0.0219083	0.30493	-0.858923	0.136276	1.36361	-0.640778	1.21486	-1.5188	1.37951	-0.785069	0.869253	-0.617816	1.77866	0.974429	-0.792535	1.51658	0.919035	5.25366	-0.168488	1.4813	-0.520291	1.12248	1.57117	0.0836238	-0.250806	-2.73239	0.482562	1.24234	3.44385	0.869991	-1.44213	1.13012	0.580264	-1.32467	0.464057	0.0835479	-0.168772	1.18516
cg00155882	-0.402226	-0.0162478	-0.775777	-1.13118	0.633688	-0.239478	-1.48396	0.415366	-0.444027	-0.571949	0.264125	-0.420585	-0.0848854	-0.303874	0.453954	0.649527	-1.27892	-0.615439	-1.04657	0.217438	0.200155	-1.455	-1.02865	0.864004	-1.02856	0.00958939	-0.67244	-0.890586	-4.66813	0.58182	0.460561	0.409302	0.418571	0.606912	-0.106219	-0.6929	-2.25754	0.560621	-0.00584409	-3.14125	0.496737	-0.714013	0.366531	0.851712	-0.326081	0.342469	-0.827059	-0.342738	-0.181312
cg22807877	-0.673243	0.751948	-1.27456	-0.161251	1.28275	-0.912788	-1.70659	0.708627	-0.675885	-0.251955	0.947086	0.312655	-0.213651	-0.0769626	0.634121	0.226014	-1.0078	-1.67988	-0.785819	-0.159605	-0.830303	-0.782215	-0.476788	1.4413	-0.542145	-0.525149	-0.431162	-0.2901	-4.69167	-1.01425	1.31866	-0.499167	0.658184	0.206737	0.622968	-0.731912	-2.62961	1.1199	0.201121	-1.67315	0.306811	-0.583568	0.0797284	0.726056	1.22059	1.00063	0.30389	-0.555867	-0.649303
cg21891967	-0.484595	0.466027	-0.127693	-0.19076	-2.4912	-3.47933	-1.97386	-2.94133	-0.655942	-1.8257	-0.757265	0.378113	1.29893	-3.01814	0.877228	-3.19139	0.271628	-0.645294	-0.297078	0.739689	-4.01104	-3.11652	-4.8376	-4.38001	0.101877	0.570769	-0.614888	-3.18622	-1.26122	0.335927	0.948508	-0.661417	0.686979	1.13191	0.442505	-3.03665	-0.173822	-0.543433	-5.00884	-1.57771	0.871254	-1.55617	-3.87056	0.389633	-0.814481	-0.949569	-0.0500233	-0.05295	0.215784
cg02722214	0.336363	0.49933	1.17015	1.79383	0.256998	-1.8958	1.21226	1.19961	0.878501	2.02813	-0.683114	-1.58454	-0.758793	1.70274	1.01484	-2.38692	0.0108235	-1.41594	-0.684704	-0.595216	0.96163	-1.98422	0.635065	2.44048	1.17811	-1.08087	-3.37996	0.604672	-7.54906	0.662045	1.57981	0.126141	-1.33528	-0.0913558	0.77491	-2.41652	0.564436	-0.825321	0.65034	-0.22069	-0.948398	-0.602602	-1.22167	-4.22604	-2.26067	-1.04415	-1.40543	-0.778102	-2.80474
cg02857557	-0.167343	1.54015	-0.0447219	0.341474	-1.24254	0.60404	-1.08901	0.35266	-0.620436	0.207059	-0.00607429	0.400874	0.614353	-0.159095	0.993456	-1.07311	-3.40347	-1.37086	-1.66954	-1.29061	-0.822953	-0.530371	0.19902	-2.2485	0.810918	-0.00094793	-2.72943	-0.591129	2.24134	1.13802	1.1289	-1.15153	-0.0528951	-0.397021	-0.0927385	-2.81853	0.109999	0.488354	0.868868	1.2277	-1.33601	0.0225614	-0.914802	0.625181	-4.00835	-0.603466	-0.893877	0.34947	-0.733835
cg25045785	-0.147645	1.23477	0.858931	0.370407	-0.359726	-0.45007	-0.39531	0.3867	-2.15696	1.35126	-0.421556	0.0961476	0.713796	0.248931	0.97742	-1.80753	-1.03869	-0.257764	-0.982806	-0.646085	0.0214094	-1.29799	0.448958	-0.552271	0.314641	-0.181644	-1.5973	0.470785	-1.35428	0.744116	0.785646	-1.39404	-1.02051	-0.402602	-0.269487	-3.33261	0.866745	-0.861674	1.22811	1.06497	0.0352917	-0.347137	-1.17956	-1.43216	-2.87218	-3.59893	-1.21568	-0.324982	-1.78341
cg02807948	1.8298	1.22244	1.77144	-0.336241	-0.451273	0.883179	-0.463996	0.305595	-1.76845	-0.521706	-0.457687	2.53861	0.401229	1.07327	-0.760245	1.01328	-0.0443501	0.471431	1.01204	3.31008	-1.31177	-0.560375	-0.452498	1.61943	0.574762	0.477254	0.572858	-0.754841	1.41664	-0.432595	2.3134	1.08117	-1.06701	-0.526201	0.416646	-0.794282	0.0563465	1.74053	0.0110921	0.140794	0.63994	-0.732031	0.0294646	-0.385901	0.322346	1.51269	-0.642076	-1.17164	-0.242576
cg13165070	4.3224	2.52022	2.92418	0.252648	-0.850874	-0.538952	0.94998	0.883393	-0.433311	-0.304452	0.134725	1.01898	0.331804	0.668111	0.578562	0.372702	0.209221	1.3748	0.545866	2.4022	0.481713	0.0597515	-0.861578	1.71535	-0.642871	0.698638	1.85128	0.190627	0.145585	-0.977973	1.7708	1.71892	-2.02356	-0.0883635	-0.113082	1.23361	1.5659	-0.451389	-0.756563	-0.3689	1.50855	-0.35704	2.33483	-0.318807	-0.197859	-0.328109	0.786945	-1.93393	-0.324565
cg07096953	2.48196	3.44835	3.33889	-0.90203	-0.117576	-1.77814	-1.44978	0.690006	-1.39692	-0.354913	-0.340201	1.98238	1.03776	0.349876	-0.200261	0.406412	-1.38611	0.638682	-0.202276	3.77046	-0.539835	0.786667	-0.608188	1.40953	0.149556	0.651114	-0.255187	-1.10235	2.76964	-0.029839	2.29501	-0.197992	-1.1955	-0.53834	-0.451332	-0.578444	0.838594	1.08898	-0.67011	4.40369	0.425581	-0.524231	0.51565	-0.517968	0.480581	-1.17367	-0.142373	-1.13704	-1.14434
cg02613624	0.483937	2.88488	3.11624	-0.485802	-1.43539	-1.01226	-2.24374	1.42633	-0.782959	-0.768342	-1.28185	2.11548	-1.57489	0.0886545	-0.649837	0.261848	-3.08534	-0.0827656	0.122904	3.05358	-1.76331	2.10369	0.604714	-1.08643	1.23025	1.40428	-0.968938	-1.46238	1.21927	-1.66022	2.037	1.55601	-1.42704	0.295272	-0.408345	-1.6295	1.61794	-0.375889	-1.71329	0.942985	-0.86553	-1.62087	1.5952	-3.13425	-2.28578	-0.0265903	-0.181872	-1.93523	-0.715542
cg22956483	1.23931	2.68713	1.12857	-1.65569	-1.46599	-0.4392	-1.1121	0.151564	-0.23506	-0.961051	0.551931	2.04979	-0.0548536	-0.252101	0.423522	0.785767	-1.06023	-0.977408	-1.181	2.19913	-0.74033	-0.0802467	-0.120494	0.577089	-0.111144	1.53219	0.694886	-0.975085	4.88992	0.187163	1.83425	0.58498	0.00101329	0.283033	-0.458192	-0.0788661	0.170868	0.339591	-0.808607	2.29742	0.0707215	-1.22683	1.03199	-2.64991	-0.214566	-1.14158	-0.646528	-0.843725	-1.32537
cg26401390	2.21878	5.45908	2.9174	1.22476	-1.93224	-1.54337	-1.18575	1.18861	-0.86814	-0.645863	-0.24576	1.34748	1.24133	-0.320445	-0.244593	-0.890712	-1.50126	0.607548	-1.94031	3.86456	-0.630441	3.29294	-0.0406053	-0.649446	-0.197072	1.98716	-0.32823	-0.74408	-2.94635	-1.08964	2.35137	1.30831	-1.88398	1.45582	-0.374061	-1.64826	1.03	-0.463855	-0.456888	1.12989	0.0954665	-2.07287	1.15218	-3.74983	-0.207951	-0.560957	-1.09248	-0.62908	-1.54583
cg05384664	1.79925	3.91496	4.08017	-0.751925	-3.45841	-1.46537	-1.86597	-0.391431	0.0219331	-1.16863	-0.0394541	0.356732	-0.256676	0.975684	1.14224	-0.629231	-0.529186	-0.106287	-2.4878	2.40705	-0.398283	0.779351	-1.67836	-0.0337088	1.3701	1.62235	-2.66616	-1.68159	5.82061	1.60238	3.45641	1.59474	-1.16193	0.846675	0.0344556	-0.936774	-0.165295	-0.409505	0.00961507	-1.44165	1.18816	-3.97904	0.785273	-2.32851	-3.36201	-1.83867	-0.422574	-1.72346	-0.639358
cg00570518	3.3005	2.97982	4.00882	-0.431638	-2.78151	-1.00883	-0.547116	0.13061	0.107189	-0.668051	-0.31597	-0.587742	-0.0921578	0.622731	1.12181	0.312582	-0.49555	-0.724917	-2.2006	2.00915	-0.179378	0.757439	-1.22451	0.538962	1.72703	2.50467	-0.823622	-1.22521	5.78372	0.704494	3.28421	1.37835	-0.571584	1.49866	-0.207472	-1.69167	1.33125	0.00682544	0.376222	-1.22448	0.535076	-2.74999	0.146498	-0.168369	-3.40444	-2.17764	0.219484	-0.962205	-0.5276
cg19642877	2.48855	6.78866	5.34155	-1.07889	-2.00938	-0.59877	-0.962471	1.03187	-0.366641	0.0252938	-0.832717	-1.26312	-0.708245	-0.785016	-0.86137	0.152633	-1.58039	-2.04873	-1.47686	0.793666	-0.14277	-0.953617	-0.417686	1.13186	-1.29872	1.99514	-0.294977	-0.53472	-4.04221	3.72386	6.21263	1.15505	0.540453	-1.52442	-0.600956	-1.36505	-3.44612	2.99071	-1.51728	-1.56765	-0.111846	-4.77498	0.58872	1.90114	-4.12287	-5.14701	3.11061	-1.24057	-0.208657
cg27119222	0.297345	1.18546	-0.543266	-8.54677	-7.70741	-6.9377	-8.59087	-7.80731	-7.98244	-2.93946	-5.35678	-6.41077	-5.70156	-4.86086	-6.94024	-7.73442	-7.98141	-8.47559	-7.53046	-8.72218	-6.67067	-8.20557	-8.65517	-8.25208	-7.07517	-5.02578	-9.19328	-7.64927	-6.03789	-8.41666	-4.27705	-1.80403	-7.75875	-8.33833	-8.04779	-8.4914	-7.70034	-6.00552	-5.23955	-3.643	-6.1113	-3.38498	-8.44563	-6.68059	-5.06754	-7.61599	-7.38245	-8.27465	-8.07986
cg11297256	-1.98228	-0.647449	-1.95924	-10.8436	-6.61054	-5.4499	-11.07	-8.89141	-9.47762	-2.90691	-7.6005	-8.24364	-4.28194	-6.74186	-9.17968	-8.41809	-10.5718	-10.0935	-7.90911	-10.6125	-5.6753	-9.61877	-10.1358	-10.128	-9.99775	-1.06582	-10.5975	-7.81837	-8.48107	-10.0551	-4.76659	-2.202	-9.4968	-10.0362	-8.42653	-9.90115	-10.8438	-8.67708	-5.11038	-6.85232	-9.58057	-0.365941	-9.85503	-9.1272	-5.22769	-10.9933	-7.01275	-9.48062	-9.73433
cg14392746	0.661005	0.395885	0.0835659	-5.3799	-4.48368	-3.08157	-5.3333	-4.61333	-4.70592	-2.06706	-2.79785	-3.64108	-1.74961	-3.74843	-4.80607	-4.10057	-5.14565	-4.95129	-4.81536	-5.07799	-3.68922	-5.02595	-4.8047	-4.39139	-4.62142	-1.00165	-5.32888	-4.01288	-5.19732	-4.3804	-1.48241	-1.20721	-3.60315	-5.00817	-4.42046	-4.993	-5.08391	-1.96547	-2.5096	-5.04362	-4.80875	-1.56892	-4.80978	-2.03054	-3.35958	-4.94866	-3.81034	-5.11306	-4.93763
cg12077660	1.85839	-0.229664	0.91521	-14.0876	-3.27544	-5.76655	-13.8427	-8.35503	-8.62034	-0.573616	-3.14836	-5.69812	-1.56245	-3.10103	-7.82998	-3.52109	-14.9602	-11.3089	-3.42607	-13.294	-2.97379	-11.3925	-11.4841	-8.57974	-5.48822	-0.617436	-15.4266	-4.64837	-3.35063	-5.048	-1.34501	-0.312283	-7.11043	-15.0598	-5.09352	-10.2848	-11.6577	-0.92996	-3.48735	-15.224	-6.58932	-0.144677	-12.7079	-10.7301	-5.08412	-15.4596	-5.09518	-10.8163	-8.74058
cg03401726	0.0994028	0.379707	0.147814	-6.22004	-2.63472	-2.39573	-5.97256	-4.44972	-3.91418	-0.911361	-1.96026	-2.83028	-1.00396	-2.06472	-3.84225	-1.6501	-6.47072	-5.11291	-1.72825	-6.1083	-1.70053	-5.46268	-5.82728	-3.80379	-2.95337	-0.632509	-6.51074	-2.97401	-1.91249	-2.28432	-0.738515	-0.739194	-3.54733	-6.38724	-2.69	-5.0951	-5.61577	-0.791448	-1.88595	-6.50771	-3.34199	-0.117713	-5.84022	-5.37296	-1.69236	-6.48414	-3.16745	-5.06219	-4.75304
cg16739686	0.405099	0.322289	0.393833	-7.48289	-6.82959	-5.26314	-7.55526	-6.91918	-6.5943	-2.61968	-4.64795	-5.30452	-2.29413	-5.0176	-6.99713	-6.31222	-7.54421	-7.34867	-7.22163	-7.35512	-5.47898	-6.89716	-6.85118	-7.27366	-5.39035	-2.4649	-7.53098	-6.57048	-7.47007	-5.99416	-1.86572	-1.60107	-5.88272	-7.25157	-6.73917	-7.39404	-7.39607	-3.06713	-3.23249	-7.28873	-6.4681	-2.14581	-7.00339	-3.92603	-2.36464	-7.5538	-6.55205	-7.37162	-7.46491
cg08359167	-0.84028	-0.311251	0.357802	-12.3789	-5.46355	-5.36676	-11.771	-9.28507	-9.56821	-2.47504	-4.03411	-6.31946	-2.60067	-4.17156	-8.67025	-5.39149	-12.5419	-10.8673	-4.97837	-11.3571	-4.17406	-10.6592	-10.4217	-8.80419	-8.22577	-0.760856	-12.5475	-5.74747	-5.93132	-6.43232	-3.0578	-1.99033	-8.44211	-11.6118	-6.57415	-10.6804	-11.9285	-1.35279	-4.63081	-11.8254	-6.7126	-1.15712	-11.2189	-11.2198	-2.95831	-12.6404	-5.91502	-10.1481	-9.2475
cg08446215	0.222678	-0.271671	-0.0673868	-8.92407	-7.9296	-5.44063	-9.03612	-8.20102	-8.09969	-3.2436	-5.08509	-6.67002	-2.97525	-5.76561	-8.61872	-7.18696	-9.00027	-8.80133	-8.51115	-8.81844	-6.36639	-8.76718	-8.61345	-8.28685	-7.58361	-3.12358	-8.9527	-7.49596	-8.76537	-7.17528	-2.13372	-2.34835	-7.47416	-8.90424	-7.81843	-8.92031	-8.77984	-4.61084	-3.77083	-8.39491	-8.32201	-2.89405	-8.73163	-4.89223	-3.43493	-9.00129	-7.26738	-8.86728	-8.96659
cg26104781	-0.273707	-0.546574	-0.0431956	-8.00716	-7.09637	-6.22552	-8.10928	-7.77331	-7.43544	-2.8477	-4.64069	-5.92141	-3.55159	-5.58396	-7.37189	-7.13461	-8.11955	-7.88997	-7.67504	-7.87291	-6.23662	-7.49653	-7.16329	-7.72967	-6.3894	-2.69772	-8.07119	-6.65956	-7.88102	-6.96202	-2.20085	-1.90815	-6.87045	-7.85938	-7.06156	-8.02343	-7.96819	-3.6155	-4.04168	-7.53545	-7.42169	-3.17399	-7.64548	-4.6753	-2.73947	-8.02099	-6.52813	-7.98552	-8.08252
cg02219360	-0.582192	0.0288866	-0.0119938	-5.69069	-5.47238	-4.44336	-5.63993	-5.36383	-5.42625	-2.68389	-3.25563	-2.36576	-2.31592	-4.03834	-5.37141	-4.30652	-5.71708	-5.66615	-5.43469	-5.60532	-4.36756	-5.45353	-5.41579	-5.48682	-4.87265	-1.96035	-5.63393	-4.76892	-5.5285	-5.3849	-2.08102	-1.6885	-5.08819	-5.62344	-5.08983	-5.60255	-5.63029	-1.22346	-3.64011	-5.17071	-5.44811	-2.94652	-4.96609	-3.94271	-4.3792	-5.64188	-4.66719	-5.60601	-5.64868
cg20699737	-0.460931	0.605722	0.39115	-7.12324	-6.35187	-3.41773	-7.0921	-6.09831	-6.62179	-2.09364	-3.58691	-3.93271	-1.82148	-4.65915	-6.37049	-5.22309	-7.08002	-6.93907	-6.66428	-6.9415	-5.0229	-6.64813	-6.39704	-6.99269	-5.36944	-1.38287	-7.03455	-6.17322	-6.87396	-6.65968	-1.90826	-1.87596	-5.47381	-6.69307	-5.90343	-6.91365	-6.95316	-2.01276	-3.53083	-6.38278	-5.8522	-2.25371	-6.45006	-5.11274	-3.87333	-7.03185	-5.43512	-6.91843	-7.03447
cg07595203	-0.370037	-0.023025	0.140401	-8.78455	-5.65085	-4.74981	-8.1497	-6.78038	-7.01227	-2.10392	-3.37058	-4.64893	-2.80823	-5.47911	-7.07786	-6.66541	-8.7931	-8.69175	-6.25197	-8.39718	-4.42682	-8.0183	-7.61787	-7.75677	-5.61221	-1.40565	-8.81436	-5.80331	-8.76599	-7.63551	-2.22766	-1.54532	-5.88326	-8.33082	-6.10275	-8.18081	-8.51443	-3.40668	-4.4616	-5.45928	-5.99407	-0.765147	-7.73412	-6.5567	-2.9336	-8.77942	-5.87731	-8.62688	-8.75384
cg09518720	0.254379	0.574753	0.421795	-6.75075	-3.23288	-1.95852	-5.73635	-4.06107	-3.94884	-1.26485	-1.81868	-1.98135	-1.2092	-2.07573	-3.8954	-3.452	-6.77064	-5.77299	-2.90531	-6.25304	-2.1015	-4.03412	-5.76604	-4.23854	-2.49903	-1.61281	-6.7392	-3.68552	-6.75359	-3.8011	-1.79764	-0.503496	-3.04404	-4.78348	-2.60147	-5.76622	-3.60539	-1.54032	-1.25759	-2.62999	-2.18899	-0.0726922	-3.83806	-4.88106	-1.33992	-6.70241	-3.192	-5.6782	-5.97708
cg14958441	0.52472	1.18695	1.29069	-17.377	-7.52945	-6.05286	-12.8054	-9.00662	-9.01145	-4.13163	-4.53174	-5.66736	-3.29686	-4.38603	-10.389	-7.77374	-17.6616	-13.5485	-8.94074	-14.7752	-5.36268	-10.9766	-12.6284	-10.2003	-4.92867	-2.64573	-16.1037	-7.724	-16.668	-9.73692	-2.77967	-1.04672	-7.31906	-11.014	-6.28597	-14.3807	-8.89578	-2.95081	-3.91988	-5.79265	-6.67981	-0.827577	-9.31921	-10.2432	-2.77251	-14.407	-7.48297	-13.0795	-13.4334
cg27323091	-1.14811	0.274311	-0.851285	-24.3914	-8.97786	-8.52715	-17.8262	-12.5219	-12.1619	-2.44844	-6.6745	-7.28258	-3.56	-5.63315	-12.5479	-12.1604	-24.3666	-18.715	-11.5151	-21.1247	-7.08678	-14.975	-18.9818	-15.8707	-6.76648	-1.39204	-23.6835	-11.5406	-24.3511	-15.1829	-3.57151	-1.68417	-9.28434	-15.5829	-10.2676	-20.0737	-11.3056	-3.78439	-4.60251	-7.3716	-9.0117	-0.0574045	-13.4582	-19.5187	-3.8083	-24.3771	-11.4659	-17.8438	-19.5627
cg01873334	-1.56337	0.38465	0.465133	-17.9214	-9.56361	-10.3239	-16.2735	-11.9457	-11.897	-4.35777	-5.6318	-8.52313	-4.42267	-7.83872	-11.736	-10.9979	-18.0085	-16.9755	-11.8846	-17.3464	-7.63162	-14.3108	-16.2398	-12.8724	-7.86693	-3.57232	-17.8529	-10.9251	-17.9917	-15.0232	-4.07367	-1.72981	-9.23909	-15.0672	-9.97874	-17.0834	-13.4476	-4.12387	-6.26964	-8.99413	-8.71283	-1.78541	-13.1363	-15.4097	-2.99608	-17.974	-10.9876	-17.2142	-16.8018
cg05816130	-0.975684	1.20164	0.36779	-14.8305	-9.49511	-3.71473	-14.1581	-11.2121	-10.1067	-3.73723	-6.31744	-9.43547	-3.49811	-7.31693	-11.8013	-6.70401	-14.443	-11.7244	-8.65856	-13.8521	-7.8442	-12.7324	-13.1268	-10.3116	-11.7788	-2.45571	-14.0958	-9.93953	-10.5418	-9.69954	-4.85436	-1.07227	-8.86009	-12.4339	-8.24977	-11.5627	-11.4476	-4.15705	-5.56652	-7.22404	-8.78884	-1.84778	-11.3685	-12.761	-2.27991	-11.7806	-7.90909	-10.9655	-9.89525
cg14243741	-1.63009	0.993693	0.02402	-11.7618	-8.41374	-4.03837	-10.4301	-8.80077	-8.23107	-3.03992	-5.64909	-7.57242	-3.50151	-5.93525	-9.53972	-5.56252	-11.771	-8.91519	-7.56237	-10.6968	-6.72003	-10.0638	-10.077	-8.11868	-9.11653	-2.15994	-10.7146	-8.03493	-11.6163	-10.0771	-3.92789	-0.943543	-6.41823	-9.91729	-6.99671	-8.80547	-9.37716	-3.97915	-4.24194	-6.99061	-6.96916	-1.46957	-9.28502	-10.8342	-1.49196	-10.4336	-6.62986	-9.12949	-8.08253
cg21137515	-0.389839	0.0746435	-0.22083	-12.1595	-8.09666	-6.04685	-11.9478	-9.67683	-8.86269	-3.81557	-6.99128	-6.46027	-4.10287	-6.43479	-9.79606	-7.7735	-11.368	-10.8479	-9.18224	-10.9876	-6.72455	-9.80519	-10.2707	-9.61411	-7.93837	-2.84968	-10.4953	-8.43719	-11.5722	-8.98767	-6.14104	-3.27359	-7.67205	-9.39314	-9.01981	-9.91581	-9.82578	-3.39277	-6.35875	-8.37872	-6.38267	-2.5861	-8.91654	-10.3621	-3.14331	-10.1025	-7.80828	-10.36	-10.5203
cg05740879	-1.30968	-0.0785781	-0.00932886	-11.2685	-7.85685	-4.11627	-10.7789	-8.8218	-7.69338	-2.77858	-5.53978	-5.7812	-3.67644	-4.86729	-8.41974	-6.80245	-10.339	-9.92231	-7.92331	-10.5515	-5.91498	-8.94849	-10.3651	-8.29345	-7.20088	-2.28624	-9.72512	-7.54605	-10.3401	-7.37826	-4.75481	-1.45889	-6.84054	-8.19321	-7.74975	-9.16327	-8.22344	-2.88255	-5.7411	-7.56897	-5.91786	-1.48814	-7.95041	-8.95754	-3.1109	-8.74106	-6.67188	-9.56839	-8.82972
cg01893176	-1.32382	-0.342164	-0.80163	-9.72534	-6.8048	-2.63592	-8.84621	-7.71432	-6.33604	-2.60823	-5.12844	-4.87788	-3.34955	-5.22388	-7.73901	-5.71894	-8.64899	-8.53355	-7.33804	-8.7949	-5.17194	-7.90319	-9.0601	-7.49996	-6.33176	-1.49139	-8.83584	-6.24693	-9.23982	-6.21723	-4.65397	-1.20223	-6.29534	-7.72741	-6.56473	-7.61861	-7.49181	-2.41264	-4.99793	-7.54767	-5.76136	-1.57022	-6.53218	-8.77993	-2.55892	-8.3472	-5.88105	-8.47639	-8.40519
cg11666921	-0.806695	-0.218978	-0.0333113	-4.77368	-4.50623	-4.26272	-4.78742	-4.37738	-4.61579	-1.82467	-4.25596	-4.21211	-2.94989	-3.91649	-4.65823	-3.95695	-4.76521	-4.57531	-4.12512	-4.65691	-3.45806	-4.508	-4.70005	-4.77576	-4.50151	-2.1322	-4.77114	-4.49378	-4.72407	-4.64382	-3.81614	-1.0126	-4.29703	-4.66026	-4.36795	-4.35438	-4.60911	-2.38152	-3.69108	-4.71443	-4.12175	-1.937	-4.67656	-4.72177	-0.527357	-4.74175	-3.18894	-4.47475	-4.44153
cg26094482	-0.314157	0.123094	0.205422	-5.20404	-5.0554	-3.74665	-5.19331	-4.72786	-5.11527	-1.27251	-4.16715	-4.34995	-2.58561	-3.805	-5.0074	-4.33041	-5.21285	-4.75612	-3.9909	-5.18678	-3.77606	-5.06995	-5.12687	-4.59631	-4.89467	-1.38352	-5.25713	-4.8533	-5.21445	-5.11366	-3.87024	-0.93402	-4.93182	-5.02825	-4.71563	-4.80807	-5.06618	-3.08758	-3.40721	-4.14085	-4.73838	-1.20759	-5.14801	-5.14804	-0.135293	-5.18712	-3.66794	-4.96123	-4.95338
cg26908876	-0.708144	0.214747	0.279263	-5.05892	-5.00192	-4.32115	-5.15719	-4.69559	-4.86079	-2.06165	-4.55716	-4.73796	-2.42802	-4.03833	-4.95323	-4.55653	-5.06119	-4.74507	-4.48017	-5.02293	-3.61545	-4.9246	-4.89928	-4.92658	-4.79355	-1.44792	-5.10656	-4.50629	-4.93333	-4.89561	-3.75711	-1.3595	-4.95139	-5.00918	-4.65429	-4.8433	-5.01603	-2.89112	-3.23805	-4.77185	-4.58185	-1.30819	-4.98057	-5.03081	-0.676723	-5.07306	-3.84053	-4.72821	-4.86716
cg03422070	-0.325979	1.18495	-0.0872429	-11.3078	-10.0994	-8.14615	-11.7256	-9.05104	-10.756	-3.57578	-8.64623	-9.14193	-5.05055	-7.173	-11.0887	-7.64751	-11.4098	-10.6983	-7.89412	-11.1181	-7.43797	-10.7109	-11.1282	-10.9452	-10.4526	-2.3346	-11.5737	-9.65527	-11.6706	-11.3505	-7.50176	-1.25826	-9.80041	-10.8316	-9.95045	-10.0157	-11.389	-3.90904	-6.97327	-8.38872	-10.1501	-1.62414	-11.1915	-11.4127	-1.32219	-11.6728	-7.29817	-10.9461	-10.3335
cg15651941	-0.697145	0.37493	-0.0251257	-8.04067	-7.91778	-6.20259	-7.99013	-6.92929	-7.68561	-2.07744	-6.54069	-7.16168	-3.35611	-5.86849	-7.74666	-6.08306	-7.8873	-7.84293	-7.40687	-7.71278	-6.05033	-7.81036	-7.89767	-7.57666	-7.14019	-3.42617	-8.1401	-7.07665	-8.11064	-7.84468	-5.79053	-1.46161	-7.21178	-7.56015	-7.30231	-7.22857	-7.64568	-4.54382	-5.87921	-6.77941	-7.18507	-1.93879	-7.89032	-7.8601	-0.904127	-7.7634	-5.71298	-7.50994	-7.84607
cg25306939	-1.14726	0.500007	-0.747146	-6.25813	-5.59179	-4.12301	-6.19974	-5.84374	-5.8929	-1.99088	-4.87444	-4.92424	-3.05821	-4.64587	-5.81723	-5.00373	-5.99398	-5.86076	-5.01923	-6.09658	-4.44467	-5.98118	-6.19927	-5.68805	-6.0039	-2.27775	-6.09471	-5.34184	-6.14459	-5.84245	-4.36697	-1.83316	-5.18103	-5.85548	-5.46884	-5.38195	-5.92215	-2.29974	-4.10566	-4.99859	-5.25327	-1.78037	-5.99236	-5.47051	-1.31069	-6.16401	-4.53828	-5.96452	-6.00909
cg02798157	-3.61285	3.79244	-0.135494	-7.92708	-7.49268	-5.73317	-9.1007	-6.73333	-7.8135	-1.93987	-4.27373	-5.16384	-4.46384	-5.30422	-6.90767	-4.51968	-10.3638	-8.74029	-6.77106	-7.33579	-6.772	-8.06231	-8.59942	-6.81415	-6.17433	-0.74722	-6.72352	-5.6274	5.94951	-3.87757	-6.44458	-1.35021	-7.09425	-8.50335	-6.33031	-8.22927	-9.32992	-1.52489	-6.14909	-5.69481	-5.53763	-2.365	-6.68324	-7.6422	-2.67367	-7.7622	-5.89753	-7.49012	-8.66448
cg27604721	-2.58428	0.341053	1.27601	-7.18031	-5.707	-3.91416	-9.04227	-5.43012	-7.74346	-1.03584	-2.32397	-5.21518	-3.10001	-5.08829	-4.41163	-6.46371	-8.31654	-7.72114	-4.60379	-6.4425	-5.20787	-6.26609	-6.96821	-6.74829	-6.20627	-2.7471	-7.58973	-4.23742	-9.666	-3.36198	-5.78283	-2.13305	-5.613	-6.83526	-4.8431	-5.63571	-2.21108	-2.51113	-5.18175	-6.39831	-5.9247	-1.97911	-4.81572	-4.14489	-2.3911	-8.13491	-6.2179	-6.97362	-7.60994
cg27182551	-0.499865	0.912164	1.04461	1.17313	-2.03983	-2.4623	-2.09593	1.71556	0.537387	-1.9769	0.46289	-1.17603	-1.00997	1.84896	0.988458	-0.0327585	-2.45894	-1.78916	-0.674299	-1.53969	-1.53891	0.693951	1.30416	0.271558	-1.23114	-0.817988	-1.99627	-1.79798	2.49349	-1.67053	-1.62811	0.832633	-0.577242	1.53746	-0.589508	-1.88125	-2.90006	-0.990145	-0.383989	-4.13831	0.0814097	-2.67141	-6.12751	0.386419	-5.22101	-3.53426	0.0227878	-1.99654	-1.58742
cg13431205	-0.745293	-0.203362	-0.427825	0.990434	0.646521	-3.29992	-0.7192	-0.438222	-0.281193	-0.723719	0.0843037	-0.451535	0.517302	0.120413	1.24348	1.22167	-1.79678	-1.90005	-0.952531	0.250434	-0.228691	-0.799571	-0.354511	2.1028	0.313872	-0.0222114	-0.538401	-1.04585	2.81983	1.18113	1.25863	0.73576	1.22138	0.521259	0.0173758	-1.55493	-1.85579	1.37677	-0.0911276	-1.62623	0.207438	-1.28083	-4.09141	-1.67142	-1.05943	-0.909053	1.19197	-0.665563	-0.713055
cg03085377	-0.494794	0.600721	0.010908	-0.269327	0.446438	-3.01476	-0.888272	0.211628	-0.490093	-0.611022	0.0202055	-0.634678	2.66577	0.0995282	0.668514	0.919398	-2.23334	-1.89896	-1.25321	0.900883	-0.425378	-0.827456	-1.30494	1.79949	0.338757	-0.355784	-1.12355	-1.42411	-1.74147	0.433007	0.440802	0.30824	1.63097	0.582662	-0.163655	-1.18099	-0.523148	1.50422	0.111795	-0.762709	0.768857	0.974075	-3.99265	1.61287	-2.80057	-0.19561	-0.235761	-0.70418	-0.687631
cg18481241	-0.565038	0.533743	0.11232	-0.397079	0.736975	-1.57766	-0.741144	0.220649	-0.123374	-0.788453	0.504679	0.273411	2.0667	-0.304525	0.276819	1.04934	-0.257618	-0.892178	-1.54427	0.975469	-0.303162	-0.756927	-0.949495	2.07421	0.0232188	-0.460379	-0.372495	-1.47766	-3.78483	1.77538	1.15811	-0.106351	1.13665	1.38804	-0.784477	-1.46561	0.325775	2.70568	0.786512	1.7997	1.13337	-0.282695	-4.46545	-1.85359	0.402164	1.84519	-0.0491574	-0.477427	-0.642742
cg25676335	-1.29097	0.157984	-0.214396	-1.04144	-0.21449	-1.33192	-1.09174	-1.12029	-0.196214	0.587076	-0.534115	1.13041	0.796161	-0.408954	-0.0571299	0.466279	-0.764068	-1.85774	0.0170437	0.874389	0.343897	-1.10921	0.104573	2.80771	-0.170201	0.830562	0.208436	-1.09506	5.77506	0.423616	1.11338	-0.392509	-0.0618427	0.929253	0.16149	0.189947	-0.768004	0.0330156	1.30261	1.27514	0.441299	-1.46158	-7.09089	3.36228	-2.78076	-1.86746	0.0263108	-0.862046	-0.0338694
cg00059930	-0.07742	-0.892785	-0.789422	-0.142028	-0.846709	-2.2859	0.470751	0.458347	1.82793	1.22762	0.206639	0.463433	0.604161	1.65924	-0.763981	-0.0133194	0.210725	0.796333	0.435756	1.43202	0.379703	-0.59348	-0.485875	3.07287	1.12721	0.497831	0.0377104	-0.556086	-3.82195	0.181106	1.92586	0.350204	-0.896713	-0.391173	1.23279	-0.853909	-0.780004	0.665898	1.02815	1.24231	-0.301482	-1.21591	-6.27422	-0.599561	-2.03856	-0.990481	0.737086	0.244383	-0.308904
cg26740195	-0.56042	-0.482317	-0.0294658	-0.222696	0.312867	-1.92726	-0.659821	-0.0556295	0.089936	0.283904	0.924715	0.185953	1.10303	-0.03232	-0.324576	0.734604	-0.757775	-1.70383	-0.679509	1.0714	0.263127	-0.480436	-0.731422	2.78695	1.12692	0.324571	0.82198	-1.29756	-4.83224	1.82874	0.847253	-0.419233	0.200325	0.183895	0.925582	-0.735784	0.25578	0.239555	1.57325	0.435031	0.129	-1.64273	-6.26096	-1.47636	-0.677811	-0.819534	-0.048367	-0.705161	-0.35416
cg27026713	-1.6591	0.293483	0.596341	-0.0746284	1.3396	-3.2984	-0.166675	0.016656	0.633703	1.00808	0.915638	-0.931937	0.835631	-0.322817	-0.789543	-0.743356	-0.403827	-1.45991	0.722321	1.07941	-1.44485	-0.664303	0.163129	2.56475	-0.680637	0.730999	0.683759	0.394722	-3.34051	0.142657	0.0578506	0.0754106	0.674774	-0.435174	-1.22413	0.133911	-0.755922	0.0114181	0.98558	-1.19743	-0.0857136	0.479989	-4.20462	-0.192585	-0.200572	-0.016153	-0.244774	-0.58223	-0.369258
cg00764369	-1.09799	-0.318183	-0.140131	3.54048	4.06116	0.337723	0.191869	1.92934	-0.129023	0.711344	-0.662729	-0.137355	-0.933952	2.0112	0.96923	-1.81473	-2.60295	-1.52981	0.829214	1.93101	-0.637498	-1.07927	-0.364037	2.22758	1.14716	-0.66343	0.533284	-1.56333	3.67306	0.205412	0.24284	0.388224	0.14534	0.624837	2.12183	-1.3323	1.51153	-0.0875041	2.13412	2.93442	0.680109	-0.0720315	0.6859	-0.471608	-4.63484	0.271384	-0.474394	-1.27192	-1.24384
cg10515315	0.226321	-0.977742	-0.733558	-0.392926	-1.05045	-2.0983	-1.75248	1.66909	0.114386	0.186526	0.334312	-0.182888	0.639862	-0.863243	0.526446	-0.549165	-2.45884	-1.2918	-1.83826	1.12949	-1.00204	0.76126	-0.968139	0.969712	-0.118754	0.446051	-0.287277	0.155303	2.91003	-0.0202682	1.59414	-0.0105763	-0.440277	0.286743	1.71239	-0.359651	-2.13853	0.416548	0.67049	0.729159	-0.0367479	-1.17051	0.154902	-2.80229	-2.51571	-0.867786	1.12359	-0.575431	-0.554988
cg23870378	-1.02969	0.325384	-1.18883	0.269011	2.02574	-0.905945	-1.14299	0.71172	-0.51914	-0.191112	0.843619	-0.254978	0.565056	-0.272661	0.291141	0.27091	-0.863906	-2.06096	-1.23179	0.301832	-2.03468	-0.761694	-0.127792	0.914587	0.847747	-0.23867	-1.10816	-0.798434	0.206949	-0.0904826	0.74106	0.310781	0.897547	0.957673	-0.410629	-0.480543	-1.94857	1.49969	-0.172692	0.949487	0.721786	-2.62373	1.44003	-1.42525	-3.0855	-2.38708	0.163209	-0.00446345	0.694264
cg14034270	0.0809339	0.764787	-1.27917	2.16751	-0.893219	-0.152501	-0.32366	-1.23368	-0.367282	0.462531	1.05032	-1.19644	-0.0884236	-1.24118	-0.104121	-1.51796	-2.20564	-3.0522	-0.583644	-1.41231	-0.659286	0.55025	-1.16287	-1.1309	-1.25399	-1.76613	-1.77101	-1.03816	-1.41944	-0.498383	1.15989	-0.47522	0.0285084	0.266101	-1.67541	-0.798947	-1.85684	2.67733	0.470842	-0.249338	0.39226	0.884119	-0.402878	-5.38174	-3.01045	-2.43992	0.412119	-0.719954	-1.67219
cg16567044	0.40877	0.717082	-0.595821	-1.20452	-2.12996	-1.44229	-1.62856	-0.904193	-0.17442	-0.503956	-0.591844	-0.112159	-1.26551	-0.122937	0.575542	-0.599455	-1.39024	-1.76333	-2.09822	-1.02137	0.585846	-1.40669	-0.0728301	0.00189101	-0.44033	1.14139	-2.73363	-0.451194	1.97321	-1.53824	0.963924	-0.430031	-0.805624	0.00705969	0.0169349	0.0153142	-3.01988	1.10851	0.236513	-3.35734	-0.596736	2.40866	-0.617983	-3.13021	-0.0244632	0.453903	-0.917634	-1.22147	-1.50677
cg10540302	-0.734584	0.800513	-0.147662	-1.07822	-2.67611	-2.25023	-1.48033	-0.962368	0.0564222	-1.20508	-1.39268	-0.140821	-1.23157	-0.706517	-0.202461	-0.970977	-2.69851	-2.54569	-2.31178	-0.812685	-0.27987	-0.599347	0.348478	-0.824679	0.392401	-0.0311745	-2.28828	-0.706751	-2.16077	-1.10845	1.87058	0.369234	-2.01727	0.32989	-0.292698	-1.64377	-0.449052	0.031088	-0.288654	-3.30305	-1.0442	-0.235761	-0.420207	-4.60798	-0.960571	-1.48364	-0.36339	-0.785341	-2.05103
cg02313552	-0.0986117	-0.0296876	0.520871	1.21102	3.19156	-2.32643	0.0558	-1.48983	0.499904	0.734436	0.130519	-1.50586	-0.308367	1.18862	-0.0736477	-0.61387	-1.39731	-1.62823	-0.770974	0.00348107	0.688337	-1.07743	2.31397	2.81995	0.116299	0.0522419	-1.55167	-0.795021	4.41983	-2.54015	0.78224	0.184249	-2.08626	-1.02607	-1.25099	1.05256	1.01056	-0.92842	2.34603	-0.662935	1.79749	-0.989723	-1.5021	-2.23074	0.2742	-0.8424	-1.26707	-0.17007	-1.38131
cg02982753	0.230528	0.367197	-1.29022	0.636982	0.409186	1.17031	-0.803906	-0.55791	-0.406841	-0.316775	0.442363	-0.140603	-0.0655433	-0.762423	-0.226667	-0.539393	-0.46744	-0.903719	-1.2009	-0.16515	-1.04859	-0.604431	-1.02201	0.181286	0.331605	0.613428	-1.13644	-0.294127	-3.04753	2.65433	0.848277	-1.85822	0.949692	1.30578	1.05565	-1.34224	-1.80098	1.86942	-0.0687291	-2.06343	0.0292884	-2.0575	0.584556	2.10957	-4.99582	1.08733	1.77096	-0.261061	-0.638752
cg02888166	-0.187475	0.160297	-1.00733	1.75542	-0.184428	-1.17312	-0.787333	-1.27104	-0.315538	0.371424	1.00507	-0.398198	-0.339311	1.34866	-1.29326	-2.8886	-2.35579	-1.86985	-1.47379	0.609934	0.115792	0.00125466	0.17656	1.26151	1.2357	-0.455863	-1.7965	1.10583	-7.73879	2.41702	3.28906	-1.80784	-0.735302	1.25117	-1.69713	-1.97997	-4.28331	1.61036	-0.391346	-0.813615	-0.813593	-1.66318	-1.54739	0.0312953	-5.18869	-2.17194	1.66424	-0.896276	-2.79276
cg24089209	-1.11377	0.687525	-0.306611	1.04901	-1.91462	-2.88144	-1.31612	-0.565342	1.89405	-0.281503	-0.370685	1.33989	-1.19996	0.348935	0.861397	-1.00653	0.0456991	-3.23398	-1.65773	0.206878	0.324262	0.802333	0.320306	0.521057	-0.00462171	-0.715396	-1.74637	-0.867009	-0.773785	1.2981	1.80759	0.510028	-0.402666	-0.42265	-0.184019	-0.198836	-0.0840452	0.764772	0.408372	-0.4076	2.20445	-0.905751	-0.0009555	-1.17537	-0.513191	3.3438	2.30743	0.0402702	-2.47886
cg16738180	-2.92273	0.993027	0.790475	0.114835	-0.167951	-1.08775	-1.92028	0.504908	-1.15219	-0.461885	-0.100684	-0.409035	-2.89522	2.11235	0.366929	-1.96171	-1.78902	-3.49666	-1.78506	-0.691657	1.42166	-0.223835	0.210363	-0.554754	1.04403	-1.22573	-3.2641	1.25743	6.88204	-1.14955	1.20556	1.58704	-2.1774	0.683629	-0.808972	-0.523874	-0.78441	1.15541	0.767662	0.436006	0.801253	-1.00755	-0.907614	-0.461619	-0.810838	1.09519	-0.735036	-0.385736	-2.34529
cg19643803	-0.94676	-0.200059	-1.05666	-0.669018	-1.24065	-2.95997	-2.58196	0.0428407	-0.12477	-0.723939	0.110571	-0.368709	-0.712399	0.310554	-0.0202127	-0.722409	-2.57097	-2.36844	-2.20609	0.474495	-0.633771	-0.203024	-1.39645	1.20822	-0.346737	-0.918087	-3.07	-0.0184277	-12.1721	2.31624	0.0361277	-2.51919	-0.0605743	0.62087	-1.0816	-1.90681	-3.9741	-0.116166	-0.0132834	0.191287	-0.38135	-2.5178	-0.0778892	-3.46914	-7.56786	-1.82865	1.44486	-1.27067	-3.14939
cg10065153	-1.43119	-1.00389	-0.111599	-0.704283	0.695297	-0.0535931	-1.25824	-0.555155	-1.52054	-0.534159	-0.162626	-0.907821	-0.610532	-0.567239	0.240778	-0.692374	-2.03376	-1.1365	-0.264847	0.664358	-0.793751	-0.488569	-0.543519	-0.075209	-0.638107	-1.44956	-1.21785	-0.997261	-4.19358	0.299	0.588147	-0.371547	0.491836	-0.00159953	-0.91016	-1.0899	-0.299485	1.06735	0.391632	0.0342221	0.160597	-1.01252	1.5997	0.615891	-1.70539	0.495897	1.1559	0.415762	-1.69934
cg09280976	-0.587967	0.260346	-0.301686	-0.372154	0.699013	-2.60248	-2.52394	-1.59216	0.0442555	-0.842086	-0.0595144	-1.97374	-2.88115	2.42411	-0.617224	-1.42309	-0.18054	-2.61558	-1.46889	-0.641459	-1.61779	-0.736914	-1.82618	-0.075995	0.714669	-1.24776	-3.12447	-0.577197	1.46223	0.674278	0.519032	-0.52878	-0.466529	1.1322	-1.14015	-1.83962	-2.30155	0.904422	-0.0153895	-0.561443	2.26086	-2.95934	-0.655419	-1.42792	-5.61083	1.47169	-0.669274	-1.00054	-2.81983
cg22940816	-0.0845722	0.551567	0.0734685	-0.945463	-2.32513	-0.562439	-0.447152	0.883322	0.772556	-0.207781	-0.480149	0.35851	0.216557	0.0455423	-0.271831	1.18915	-2.41569	-0.627318	-0.894031	0.388075	0.0316017	-0.182518	-0.563257	-0.22813	0.437835	0.361683	-0.789898	0.234134	1.32965	2.12552	1.16056	-0.924114	-1.21745	1.27259	0.977424	-0.747061	-2.52889	1.5631	0.464813	3.38491	-0.0249686	-2.39896	0.970985	-1.99031	-1.41087	-1.56429	0.951909	-0.704426	-0.0594202
cg14070323	-0.782732	1.47667	-0.250221	0.824606	2.36293	-2.90609	-0.563513	-0.200345	-1.06089	-0.5251	-0.0305569	0.994928	-0.325588	-0.292892	0.271308	-0.523664	-0.128538	0.0778014	-1.42364	-0.188878	-2.02299	-1.36914	-1.08711	1.58392	0.511541	-0.214964	-1.20366	-0.897093	5.62656	0.985676	1.15325	0.132492	0.60434	-0.507934	-0.840653	-0.929778	-3.5143	1.45934	0.497472	-1.64084	2.06531	-4.33374	1.08918	0.162235	-3.09166	-0.373377	1.01917	-0.236207	-2.52816
cg14119337	-0.556802	1.31114	-0.270074	-1.27665	0.352924	-2.74094	-0.751176	-0.482012	-0.541613	-0.216672	0.34182	1.51726	0.522774	0.116946	0.123936	-0.585514	0.638512	0.019439	-0.184168	1.17561	-0.893575	-0.135547	-0.775638	1.74346	1.35763	-0.684607	-0.789821	-0.300411	5.81514	-1.14681	1.41088	0.145407	1.43284	0.474599	-0.608967	-0.945755	-2.38167	1.40531	0.506461	0.113462	1.23125	-2.37028	0.849231	-2.03405	-2.12024	-0.045482	1.23783	0.685821	-1.61286
cg20952167	-0.703003	1.03127	-0.045669	-0.350373	1.32588	-3.61231	-1.33778	-0.442522	-0.460019	-0.260122	0.463654	1.03294	0.184436	-0.232753	-0.139182	-1.43195	-0.448061	-0.298784	-0.594517	0.863777	-1.05907	-0.92454	-0.883696	1.24866	1.10998	-0.135566	-0.224176	-0.714281	4.21178	-1.25173	1.36474	0.0519612	1.82121	0.481127	-0.675005	-1.34137	-2.82485	1.89518	0.694291	-1.58186	1.26387	-2.93555	0.135593	-2.39488	-1.9699	-1.30969	0.587851	0.176715	-1.57176
cg12967319	-0.538131	1.18445	-0.51272	0.185582	-0.0608298	-4.73495	-1.34891	0.309757	-0.201683	-0.0456854	-0.405902	0.562669	0.098966	-0.113569	0.200447	-0.239133	-1.04031	-0.239549	-1.13757	1.18621	-1.14904	-1.2506	-0.505739	0.876512	0.551952	-0.0372067	-0.45912	-1.04922	3.87875	-0.325095	1.47309	-0.235573	0.877694	0.0493846	0.0398469	-1.56616	-3.57548	2.21752	0.0447374	-1.5866	1.08582	-2.53242	0.846442	-2.03455	-1.89476	0.581829	1.69695	-0.476689	-1.01351
cg04304932	1.14866	0.559422	-0.330942	1.67075	4.23401	-0.674775	-0.654195	-0.91098	-0.337926	1.21062	-0.609666	-1.01222	-1.09493	1.1634	-0.0578203	0.091991	0.718153	0.122624	-2.3501	0.474559	-0.420465	-1.61048	-0.56748	2.47662	1.78832	-0.783673	-1.14711	0.577213	9.83237	1.42251	1.08815	-1.05287	2.37746	0.166827	1.72025	-2.05326	-1.15862	2.21988	-0.493482	4.6596	1.39897	-3.6949	0.48302	-4.20181	-0.178945	-2.85944	-0.24654	-0.325873	-1.50425
cg04576764	-1.22887	1.19058	-0.355697	-2.09246	3.17297	-1.55178	2.29213	0.318235	-0.0134104	0.130725	-0.464381	-0.282809	0.163348	0.553963	0.867145	0.104311	0.953039	-0.400111	-1.65749	1.16418	-0.00809106	-1.93748	0.198401	1.70613	1.15283	-3.00965	-0.954947	1.43618	9.90709	0.162653	1.31347	0.0541208	0.441352	1.68983	0.634096	-1.34381	-2.21598	1.41658	-1.64303	5.73348	2.07709	-5.00498	1.56236	-3.23476	-0.850847	-4.1305	-0.574124	0.304024	-2.2335
cg25836301	-0.414412	1.05221	-0.34124	-0.425554	0.20545	-1.20071	-0.956891	0.701	-0.118185	-0.710865	-0.615979	-0.179478	0.0406831	-0.0717619	-0.234958	0.0225323	-0.975041	-0.584889	-1.80832	-0.0857206	-0.600731	-0.807157	-0.378361	0.604965	-0.304894	-0.924846	-0.844197	-0.0545024	3.9105	0.172368	1.35989	0.164366	1.24821	0.395292	1.22309	-0.527975	-1.8022	2.55096	0.197453	-0.849789	1.02906	-1.90609	0.903651	-1.72908	-1.39237	-1.62323	0.482615	-0.43853	-0.964975
cg09926418	-1.1159	0.400926	-0.606809	-0.0601685	0.366404	-1.66514	-1.37122	0.3147	-1.15942	-0.134853	0.200062	0.588028	-0.668062	-0.612915	-0.0801401	-0.398806	-1.77933	-1.47162	-0.826212	0.042287	-0.593216	-0.791273	-0.364378	0.861179	0.355146	-0.524917	-1.00084	-0.699065	1.67435	-1.24062	1.5646	1.60146	1.56752	-0.142152	0.868938	-1.49866	-2.11095	1.85643	-0.0224281	0.985368	1.14162	-2.97108	0.809214	-2.67105	-2.22852	0.250764	2.70116	-0.802298	-0.716738
cg23176399	-0.25986	0.0488055	0.0539261	-0.5075	-0.3492	-2.59181	-1.15239	0.340544	-0.427096	-0.343884	-0.172893	0.143394	-0.756909	-0.0912383	-0.154208	-0.195119	-0.908961	-1.33095	-0.704434	0.434618	-0.18597	-0.489728	-0.544744	0.963462	-0.460405	0.00410908	-0.238223	0.139649	-4.95964	-0.00310871	1.60044	1.30375	1.3191	-0.185188	0.732488	-0.79912	-0.939414	1.54593	0.400438	-3.66237	0.2332	-1.05154	0.867704	-2.0495	-1.75166	0.913992	1.85563	-0.245711	-0.8401
cg05711886	-1.03404	1.22872	-0.191233	-0.432085	0.384074	-3.08727	-1.47018	0.542076	-0.0717272	0.0358638	-0.784842	1.59578	-0.515583	-0.161847	-0.345345	-0.334672	-2.09985	-0.553252	-0.210442	1.0505	-0.725794	-1.93423	-1.18388	1.07759	0.0571783	-0.565843	0.0629686	0.457498	2.70925	0.0602286	1.54142	-1.58219	1.06195	0.376083	0.408929	-1.08548	-0.166574	1.31235	0.445598	0.306895	1.21935	-2.17062	0.509971	2.54786	-0.59932	-0.869765	1.49952	0.451391	-1.42786
cg15419911	-0.601987	1.54902	0.54294	0.894526	3.22357	-1.87885	0.985179	1.63298	-0.208664	1.26812	-1.07256	0.00946433	-0.369269	2.42727	0.878407	0.371849	1.78733	-0.278271	-1.09511	0.729423	0.66472	-1.64264	0.0840174	2.46071	1.78151	0.235843	0.0615801	-0.297036	0.270614	0.0425586	0.358389	-0.866296	1.03999	-1.0031	0.85444	-0.26908	2.1282	0.634074	1.01936	0.694823	1.10852	-1.00107	0.50565	3.25691	-1.70178	-1.80008	0.868793	0.779127	-0.616232
cg14245102	0.584347	0.973765	-0.784946	1.47873	-0.295688	-1.46679	1.02739	0.669638	0.0494022	-0.235867	-1.79608	-0.721089	-0.814874	0.248005	0.833157	1.19759	0.240154	-0.410806	0.326752	1.30733	0.691275	-1.44818	-1.81736	2.64925	0.120783	-2.09531	0.0569071	-0.256102	-4.37437	3.51041	3.18574	-1.05894	0.591244	-0.0589996	1.47108	-1.89483	-0.0361644	1.56501	1.63842	1.42301	1.35659	-1.3069	-0.0381695	-1.79061	1.80611	0.0627932	0.915272	1.24853	-0.30799
cg15373285	-1.47415	0.211816	0.165349	-0.545832	-1.04625	-1.46199	-1.15711	-0.215534	-0.717796	-0.706289	-0.864496	0.281911	-0.341972	0.14037	0.201572	0.608766	-1.55236	0.33571	-0.646481	-0.5655	-0.718266	-0.451714	-0.390064	0.175624	0.296517	-0.359366	-0.964504	-1.04511	7.99792	0.517834	0.600539	-0.222733	0.883819	0.365513	0.294687	-0.425279	-0.853725	1.54866	-0.00306827	0.433886	0.792947	-1.30522	0.751036	-0.0586636	-1.63957	-1.38687	0.993527	-0.291102	-0.244343
cg14123427	-0.50249	0.200179	-0.218521	-0.57579	-1.97412	-0.606785	-1.34997	0.321908	0.246248	-0.383863	-0.271747	0.539492	0.258632	-0.462367	0.241862	0.299046	-0.239339	-0.112475	-0.624223	0.933455	-0.235954	-1.17423	-0.690544	0.031631	0.281318	0.074486	-0.706213	-1.04757	3.19729	1.61161	0.907201	-0.00509866	0.31067	0.25488	1.54249	-0.339127	-1.69615	1.17274	1.12505	-0.434107	0.271974	-0.859599	0.904121	-1.08704	-0.320625	-0.638181	-0.527033	-0.0664611	0.378299
cg15101633	-1.64428	-0.762378	-1.19233	-2.0532	-1.68536	-3.63299	-2.37541	0.764956	0.707417	-1.02671	-0.673022	-0.017711	0.0183881	-0.327758	-0.569107	-0.453506	0.304111	-1.46907	-1.3711	-0.196189	-0.0572398	-0.993117	-0.94814	-0.375502	-1.0802	0.532784	-0.948082	-1.00901	-1.90348	0.0794766	0.877588	-0.305104	0.0459967	1.48624	0.438553	-0.903261	-1.6668	-0.372045	0.263846	-0.849167	0.409267	-2.78098	0.639247	-2.36354	-2.43576	-0.615965	-0.377181	0.143423	-0.428484
cg26374305	0.802821	1.1361	0.096803	0.0818413	0.603343	1.9101	1.22638	1.17238	0.177754	-0.604175	-0.0558939	1.53972	1.07073	-0.278775	0.921252	-0.126715	-2.7377	-0.744421	0.0364169	0.528388	0.932386	0.00926223	0.296522	3.0472	2.01841	-0.351975	1.3193	0.480025	-2.42399	2.75581	1.63835	-0.931133	0.543499	1.50937	1.10397	-0.664926	-1.98707	-0.38358	0.807186	-1.83332	1.78388	0.49855	0.310478	-0.0698111	-1.75437	-1.11945	0.873945	1.01322	-0.49413
cg06804177	0.0521561	-0.306628	0.209484	1.12847	2.52822	-1.72843	-0.463523	0.71932	-0.795676	-0.688454	0.828118	-0.938555	0.00157139	0.445946	0.31123	-0.266575	1.09853	-0.650829	-0.815421	0.68232	-0.289806	-0.77275	-1.19618	2.13451	-0.103384	-0.846476	-0.453181	-0.583675	-1.87676	-1.42641	0.11523	-1.0332	1.20096	0.585528	-0.637469	-0.934573	-0.871904	1.711	0.399773	-3.70653	-0.386136	-0.331566	1.09439	0.779977	-1.90898	0.513314	0.308867	-1.7701	-1.33282
cg17819168	1.65666	1.77575	0.32938	0.899851	-0.553999	-0.903686	1.50566	0.55064	-1.38267	0.133319	0.631253	1.73138	2.00774	1.16795	1.30077	0.435142	-2.91161	0.502547	-0.259116	0.333457	0.771842	-0.279233	-0.2256	0.514928	1.68792	-0.311527	0.960064	-1.75242	0.82822	1.695	-2.58042	-1.90316	0.435914	0.882874	-0.283059	-1.39632	-1.25098	-1.46327	-1.72178	-0.82123	0.164037	-2.37607	0.274076	0.567021	-0.215634	-0.443273	-1.17239	-0.189213	-0.656301
cg13423098	-0.685338	0.414447	0.152768	-0.0493714	-0.106452	0.495961	-0.0124257	0.782524	0.21071	0.147896	1.47219	1.46957	0.149976	2.68107	1.2476	1.41227	-2.05608	0.242036	-0.591864	1.18471	-0.690094	1.34712	0.915072	2.55747	2.01634	0.674484	0.921179	-0.0075425	-1.41772	-0.727733	0.445576	0.123311	0.510236	-0.348684	0.0828362	-0.656911	0.721246	-0.944859	-1.38362	-0.555232	-0.323326	-1.40771	0.147808	0.217476	0.484586	-0.987177	-1.84073	0.0537049	0.0648166
cg09437135	-0.823897	1.28353	0.984537	-1.76623	0.413772	-5.61106	-1.23371	-2.92227	-0.467728	0.539863	0.203342	-0.172633	1.3161	-5.26738	1.74091	1.0714	-2.84003	-2.04936	-1.84442	1.1715	-0.640487	0.653894	-2.65722	-2.45063	-0.399275	0.228986	-2.33953	1.14829	0.585627	-0.951911	1.11182	1.19499	-1.30899	0.674697	0.0798577	1.03688	-3.02409	1.08216	1.24142	-1.74408	0.645918	-0.603017	-0.403049	-2.90906	-0.481743	-7.66009	0.77246	-0.594086	0.708466
cg20769842	-0.27431	0.654967	0.84166	0.527982	-2.34302	-3.37428	0.521997	-3.01712	-0.683566	-0.317953	1.37988	0.292265	1.81181	-3.72138	0.943667	0.725833	-0.675119	0.198067	-0.227384	0.964375	0.179314	0.00948862	-2.54322	0.82205	-1.47195	0.155983	0.940008	0.145492	0.757387	1.46067	1.19628	0.349111	-0.666539	-0.363389	0.906654	0.937046	-0.109858	0.85358	-0.042419	0.916147	0.956444	-0.0384096	-0.41611	0.763721	-1.9581	-2.01218	-0.597478	-0.684652	0.412694
cg16131766	-0.230167	0.652715	1.13513	0.0547237	-0.946826	-6.02075	-0.228593	-5.11568	-0.65575	0.779351	0.596103	0.83056	1.78102	-7.47256	2.07216	0.983179	0.537495	-1.45652	0.158298	2.03268	-0.756372	-0.554286	-0.453157	1.86335	-0.627964	1.11774	0.407079	0.943721	0.726092	-2.24988	0.656577	1.50917	-4.54331	0.817817	1.74662	1.6383	0.0787172	-0.591308	0.186333	-3.99515	0.991254	-3.1183	-1.03938	-1.10798	-3.72415	-5.36981	1.22024	-0.700885	1.90639
cg20792895	0.196841	0.677653	1.4382	0.614693	-0.333074	-8.71739	0.163883	-6.69712	-0.30933	0.938379	0.418876	-0.271527	1.18969	-6.87271	1.32515	0.888339	-0.759818	0.094981	1.35376	1.80813	-2.08941	0.614841	-0.711638	0.712027	-0.477917	0.47816	-0.102525	1.35207	-2.59419	-0.728089	1.18938	1.07615	-2.65127	0.584251	0.860004	0.515068	-2.48301	0.611078	1.2532	-0.440688	0.706345	-2.15885	-2.52364	-0.156885	-2.39686	-3.72437	0.34205	-2.45404	0.299108
cg00215587	1.12905	1.14515	1.1359	1.06329	1.22132	-6.41662	-0.206511	-5.09162	-1.00106	0.729122	-0.0370851	0.345794	0.828988	-6.11114	1.01906	1.10953	1.20533	0.63877	1.19116	1.02794	-2.74358	0.839405	-1.29144	1.17392	-1.69746	0.192221	-1.58911	0.837041	0.969816	0.843764	0.977923	1.1686	-1.22538	0.678886	0.962554	0.0222102	0.751223	-0.0919466	-0.195031	1.17706	1.15489	1.11207	-1.95036	1.14652	-1.34247	-2.69144	-0.16125	-2.12676	1.19829
cg11100640	1.11662	1.74832	0.800996	1.61682	-0.0339383	-5.4051	-1.34709	-4.11685	-0.667735	0.0564931	-0.0934885	0.31123	1.03618	-4.68168	1.08521	1.68243	1.81926	0.645209	1.83589	1.76923	-1.94281	1.27839	-0.671453	0.949083	-1.54348	0.700547	-1.47552	1.63087	1.45356	1.06139	1.54371	1.98408	-1.16221	1.04416	1.56603	-0.201018	0.867995	-0.598381	0.119916	1.32844	1.05665	0.194726	-1.73535	2.59011	-1.2591	-2.68212	0.694666	-1.57118	2.02884
cg23234999	-0.589293	0.476783	0.435765	1.57722	-0.501456	-7.12249	-0.808168	-3.78775	-0.956185	-0.261606	-0.5818	-0.235151	0.949185	-6.00597	0.519744	0.89805	0.471102	-0.13207	1.59162	1.20406	-1.60527	-0.0558715	-0.813522	0.955738	-2.16182	1.20953	-1.4045	1.71181	-4.96648	1.44939	0.839703	1.01788	-0.925596	0.207152	0.987541	0.875263	0.379317	-0.357363	-0.814381	-1.48305	0.893446	-1.2952	-1.29681	-0.234554	-4.42114	-2.84721	0.267572	-1.5175	0.898901
cg07760796	0.0621216	-0.082384	0.667008	1.99581	-0.89325	-7.40076	-0.329651	-3.12619	-1.63679	1.0599	-0.40457	1.59799	-0.765647	-2.47587	0.410254	0.199507	-0.0415819	1.483	1.34161	0.836424	-0.553515	1.21039	-0.82457	0.690303	-3.13226	0.138387	-0.384667	-0.0472524	-0.492361	-0.825371	-1.63958	0.989372	-1.13375	-0.857441	0.651396	0.241156	1.20192	-1.91947	-0.00806083	2.68786	1.13881	-2.55395	-1.28211	1.78246	-7.4148	-0.0550062	2.41078	0.028748	1.5175
cg20747630	-0.863601	0.389732	-0.85463	-2.74957	-3.30644	-1.47746	0.213407	-0.747521	-1.18061	0.802305	-0.884997	-0.150695	0.0748099	-0.0326958	-0.499681	-0.661843	0.576149	-0.706707	1.01386	-0.0158757	-0.973837	0.845867	-1.40661	0.532171	0.0676815	-1.5805	-0.36777	-0.640741	-4.62356	2.71671	-0.839084	-0.333139	2.20251	0.916787	-0.992489	-1.55073	-2.20721	1.90767	-0.748056	1.03059	-0.234215	-1.27078	0.18735	-1.2172	0.334359	3.34778	-1.67044	-1.26638	-0.789253
cg14432018	-1.37323	1.04471	-0.278332	-1.63848	-2.11056	-1.13399	-1.39349	-1.89541	-0.0595772	0.309089	-0.430649	0.31348	0.0686464	-0.39582	-0.283421	0.0960108	-1.20597	-1.49208	-1.52378	0.338321	-1.30748	-0.439263	0.00326713	0.462006	-1.00378	-0.54603	-0.798678	-0.618285	0.338938	0.579704	0.834895	0.710387	0.602643	0.672906	0.74712	-0.524585	-3.10788	0.124142	-0.450768	0.846509	0.501866	-0.331718	0.8969	-1.58106	-0.336233	3.03224	-0.544064	-1.55089	-0.794493
cg19961998	-0.843958	-0.908164	-1.7802	-0.899387	-0.94872	-0.738619	-1.32046	-1.193	-0.361863	-0.383331	-1.10135	-0.443534	1.12584	0.366371	-1.86453	-1.01454	-1.39519	0.288687	0.0204495	0.540414	-1.24822	-0.458587	-1.18688	0.202532	-0.41703	-0.409643	-0.85552	-0.135791	-2.58951	-1.06726	0.606881	0.267484	0.869847	-0.605193	0.970178	-0.627636	-2.07073	-0.22614	-0.735305	-2.53897	-0.210742	-2.58702	0.0958393	-0.169008	-2.34806	2.26197	0.724689	-1.88393	0.525094
cg18253764	-2.15731	-2.36082	-1.89113	-2.77616	-3.01412	-2.81489	-0.672772	-3.07411	-0.0454199	0.471406	-2.36044	-0.584575	0.327774	1.00142	-1.28678	-1.68908	-0.826848	0.29296	-0.31904	0.516495	0.418641	-0.304759	-2.58591	-0.353715	-0.604156	0.721206	-0.124962	1.72594	-8.05362	0.0508833	0.969129	-0.498207	-0.789063	-2.41193	1.07277	-1.37831	-3.07405	-0.586688	-0.456349	-5.81799	-2.05142	-3.12975	1.64434	-0.13949	-2.7323	1.18429	0.184253	-0.733849	1.18328
cg22872376	0.601324	-0.137584	0.304968	-1.70801	0.644076	-3.91658	-1.01026	-2.98985	-0.772142	0.185371	-1.25222	0.199592	-0.852781	0.39335	0.600844	1.15643	-1.04351	0.869858	-1.95774	-1.04206	-0.693403	0.00307635	0.621871	-1.72986	-0.0932928	0.208883	-0.811761	-1.40755	0.354092	-0.387368	-2.05891	-2.99185	0.456916	-1.09928	1.25513	-0.0825624	0.3721	1.79859	-1.29143	-2.87455	0.405134	-0.727706	-1.36901	-1.68071	-1.21146	2.14269	1.10793	-1.77888	-0.974364
cg06743811	-3.87067	-1.82805	-3.07583	-1.63906	-3.16561	-2.16279	-0.152518	-2.08739	-1.75487	1.19317	1.00954	-2.20629	0.358498	-1.09677	1.04796	-1.70272	-3.10873	-1.95285	-2.43004	-0.729631	-2.41619	0.20916	1.8719	-2.02015	1.03598	-1.48341	0.546755	-1.96833	-3.96163	-1.91709	0.48723	-2.43319	0.494373	-0.92242	-0.341227	-3.3125	2.53337	-0.639441	-2.16003	0.929343	-0.521201	-3.49516	0.754328	1.84955	-1.02349	0.95232	-2.82601	-1.89945	-3.66116
cg13828758	-0.615617	-1.12946	-2.01193	-0.364188	-2.62043	-0.553032	-0.979342	0.929268	-0.141682	0.542512	-0.726753	-0.302879	-1.74475	0.931194	-0.0245711	0.433693	-2.47626	-0.227454	-0.505008	0.154655	0.435199	-0.0986424	0.906493	0.676662	-0.619164	0.321573	-0.833372	-0.341454	0.117527	-2.28361	1.2495	-1.40044	0.414653	-0.113185	0.821086	-0.570966	-0.865124	-0.0423341	-0.152784	-0.518857	-0.225238	-2.04212	0.718299	-2.52065	-2.53084	-1.56088	-1.86361	-0.726957	-0.875856
cg22694067	-1.02506	0.284286	-0.353833	-1.02868	-1.11083	-0.803205	-1.01201	-2.17214	0.722293	-0.264429	-0.391115	-0.845382	-1.43833	-0.474938	0.279845	0.152212	-0.273543	-1.5239	-0.178449	1.19085	-0.752032	1.27046	-0.190202	0.360082	0.540777	0.834552	-0.324163	1.12944	1.1626	-0.831356	0.488234	-0.256975	0.48694	0.693708	1.55531	-0.575257	-0.718844	-1.3858	0.950846	0.378702	0.212663	-0.261534	-1.28109	0.472903	-1.33565	-1.95499	-0.418628	0.401765	-0.539146
cg26725891	-1.33888	0.424205	-0.131783	-1.02527	-1.42711	0.340166	-1.09847	-0.866019	-0.551531	-1.04127	-0.625453	-0.322595	-1.09499	-0.91762	0.669094	-0.164115	-2.18571	-1.60355	-1.28834	0.912714	-1.81108	0.671175	-1.4493	-0.104108	-0.546075	0.22505	-1.04825	0.180172	0.0515791	-2.34263	-0.572267	-0.695902	0.623087	0.053769	-0.339425	-1.47222	0.169706	-2.90427	0.530928	-5.32426	0.297048	-0.768754	-0.00385185	-3.24249	-0.827558	-1.12681	-1.13494	-0.505505	-0.565046
cg18552939	-1.06917	0.283274	-0.539912	-0.761314	-1.90579	-2.19348	-1.28212	-1.4616	-0.532606	-0.715019	-1.30515	-1.38644	-2.3053	-0.63668	1.29616	-0.428191	-0.347965	-0.935536	0.000717104	0.228489	0.498719	0.00479148	-0.779975	-0.015495	-2.05321	0.899066	-1.12948	0.515952	-3.42657	1.62707	-0.92024	-1.76745	0.449577	-0.518082	0.33368	-0.520444	0.267897	-1.82738	-0.9762	-0.431401	1.53826	0.0697107	0.224418	0.107763	1.57289	1.82519	-0.851245	0.579922	-0.0878014
cg01989224	-0.626732	-0.84146	-1.088	-0.0869113	-2.09673	-1.78258	-0.778268	2.97921	-2.25414	-0.190636	3.39615	-0.476243	1.02962	2.43122	2.61648	1.77976	2.65829	-0.179373	-2.74014	0.529803	-4.44491	-1.5166	1.33527	0.153517	-1.54467	0.798897	-1.82721	1.0094	-0.865749	-0.421729	0.0552822	-1.22661	0.960203	-0.578103	-1.75767	-0.907058	-3.76874	2.00334	-1.72588	-0.945106	-3.59917	-2.2611	-0.477691	0.525836	3.138	-0.0168601	0.437115	1.35783	1.73078
cg22491305	-1.33486	0.37701	0.296292	-1.46002	-0.944086	-0.79398	-0.502439	-0.459179	0.0358583	0.296536	-0.026883	0.00806765	-0.91773	1.64703	0.353284	0.429525	-1.98701	-1.98243	-1.45162	0.737464	-0.934115	-1.31784	0.503632	-3.25902	-0.251747	-0.450855	0.690569	0.180537	-5.91165	-2.12809	-0.499293	1.42787	-0.41061	0.086284	-0.344295	0.877377	-6.69866	-0.345488	-0.701175	-3.68485	-0.334069	-2.7016	0.601952	-1.66847	-5.16899	-0.503123	0.13619	1.00776	-1.28773
cg11265941	0.968523	1.43745	-0.188955	1.82386	-2.87588	0.494316	-1.11822	-1.75955	1.22168	-1.04175	0.0582947	-0.129518	1.1038	-3.02617	0.567906	-0.417098	0.770011	-0.290313	-2.58437	1.10768	0.774277	0.879268	-1.28326	0.0842771	-0.693301	0.0371608	-0.090816	0.0788972	4.42272	-0.825721	-3.07541	1.00372	-0.560609	0.97381	0.6593	-1.24738	2.08655	1.42338	-0.359211	1.95302	-0.616726	-1.4692	1.04149	-0.0373559	-2.23703	-0.416804	-0.554459	-1.96439	-0.422889
cg24785225	-1.63573	-0.713575	-0.430418	0.395308	-6.80454	0.286712	0.780801	0.789842	1.32044	1.67597	-1.18401	0.776692	0.254644	0.526272	-0.270991	-1.43157	-1.1593	-1.20919	0.131344	1.21755	0.806605	-0.0679491	0.401106	-1.34489	0.0838902	-0.0628455	-1.96587	-1.11175	-9.29485	-0.740712	-0.447742	0.480356	0.886645	0.918212	-1.20778	-0.911993	-1.78911	0.679772	8.14231	0.967654	0.207457	-5.30681	-0.770278	0.533252	-5.03657	-1.47136	-2.35713	0.607157	-1.55199
cg10271763	-2.02336	-1.49611	0.116932	-0.162128	-6.12154	-1.30809	-0.430881	-1.06361	-1.56515	0.784658	1.30505	-0.619985	-0.456925	2.36746	-0.480446	-1.20236	0.077878	-1.63569	-0.126821	0.732047	0.715814	-1.55797	-2.85778	-2.17751	-1.12017	-0.660366	-0.99467	-1.78025	-8.29432	0.250938	-0.517443	-0.496442	0.214242	0.780011	-0.475094	-1.40948	-0.239673	-0.0201072	15.2527	1.1583	2.29105	-3.76715	-0.778831	1.48269	-5.70142	0.289872	-0.235081	0.147071	-2.58589
cg27304225	-1.59872	-1.04062	-0.943388	-0.243692	-4.38213	-1.28993	-1.02406	-0.243842	0.00718014	-0.831566	-0.572492	0.052131	-0.190429	1.09957	-1.38245	-0.862102	-0.639257	-1.46073	-0.451677	0.497468	0.494407	-0.373586	0.0427109	-0.982475	-1.14396	0.803986	-1.16885	-0.311329	-2.98466	-3.74629	0.531224	0.460007	-1.20764	-0.15376	0.181849	-2.92966	-0.650627	0.466611	-0.54578	-0.932036	-0.426849	-2.02064	1.20541	0.769199	-3.6309	-2.24719	-1.11658	-0.240713	-1.01902
cg19803984	-4.48164	-0.398334	-0.107263	-1.86184	-3.25017	0.618754	-0.651977	2.09506	0.715798	0.12857	-0.108312	-2.12013	1.01401	-0.324119	-0.460291	2.10877	0.184979	-0.646788	-3.98234	2.32073	-0.584831	0.941434	-0.766407	-1.09372	0.139508	0.773465	-0.472943	0.435914	-2.64814	0.241299	0.793105	0.873068	0.13283	-0.221991	-0.782724	-0.438371	-2.22884	1.56733	-1.36911	1.00297	1.30415	-3.04286	0.684629	3.05066	-4.16197	0.0836595	-1.14168	0.254686	0.162168
cg26033681	-2.02673	0.200691	-1.67609	-2.52937	1.63622	1.89585	1.33349	1.61714	-0.88264	-1.00977	2.23681	2.08991	2.10779	-0.512762	2.04303	0.854904	-0.459372	0.279801	1.23038	-0.372067	-0.732217	0.189301	-0.962411	0.419372	0.0616431	-1.15214	1.59432	-1.04296	5.65589	2.81895	-1.40329	0.803753	1.91207	1.01933	-0.694158	1.3587	0.881033	1.93488	-1.24973	0.022228	0.847766	-0.232379	1.48895	1.47642	1.24554	1.14086	-2.50068	1.79815	-0.148099
cg25978208	-0.859444	-0.103089	-0.0580185	0.578484	-2.67051	1.18271	-2.01298	0.527637	-1.82435	-0.655452	0.697877	0.116905	1.02129	-1.91445	0.965634	-0.695671	-3.29023	0.63832	0.367912	0.285211	-0.864525	-0.897327	0.293767	1.44669	-1.51539	0.959246	-0.115993	-0.999107	1.38433	-1.66019	1.65432	-0.341798	0.178208	-1.86689	0.673437	-0.839521	-1.2838	0.790975	-1.29942	-1.20725	-0.913548	-0.833289	-0.234919	2.45964	-2.13303	-1.05707	-2.22179	-1.45788	0.797355
cg02171545	1.07652	0.842476	-1.09741	0.0191099	-1.37613	1.26936	-0.456507	3.59097	0.736999	0.734037	1.33483	-1.27701	3.57892	-0.660089	-0.0326429	2.04956	-1.64689	0.895204	0.458385	0.598357	0.9865	-1.5091	-0.337645	2.20906	-0.937878	0.53495	0.393681	0.538829	0.274085	-0.990393	-0.255424	-1.15835	0.852976	-0.587856	-0.168169	1.03404	-0.925166	0.0848043	-0.616039	-1.93761	0.669525	-1.47613	0.15631	2.46823	-0.464986	2.5018	-0.662889	-0.431907	-0.443211
cg02305723	1.24367	0.848561	0.426748	-0.297868	-2.00079	3.18489	0.325023	3.86339	-0.652925	0.106785	2.09374	0.0643197	2.93521	0.58552	2.11781	2.59192	-0.00441874	1.44727	1.71814	-0.0810827	0.468178	-1.38236	-0.584561	3.34747	-1.29266	-2.2806	0.186777	-0.787255	5.88651	-2.09432	-0.07497	1.12207	0.342365	0.295888	1.26602	0.981691	-2.05432	1.16152	-0.303326	-1.22224	-0.730458	-1.06991	1.72576	1.4607	-0.434247	1.76972	-0.430909	0.930015	-0.100889
cg22678136	-0.527887	0.141255	-1.31821	-0.5728	-1.53979	-0.50781	-0.590517	3.08109	-1.28701	0.666664	1.72886	0.199409	1.65476	-0.368022	1.28398	1.82157	-0.768963	1.47769	1.48546	0.184178	0.617255	-1.15207	-1.11329	1.44214	-1.56104	-1.35032	0.448014	-0.878716	2.89324	-1.68785	1.12956	1.60767	-0.223267	-1.46551	-0.0510521	0.865929	-0.852443	1.90339	-0.315768	-0.542938	-0.938634	0.116356	0.0170114	0.601961	0.660729	-0.810218	-0.744806	-0.521205	0.817126
cg08560373	-0.329632	-0.316466	0.137373	-1.92299	0.544465	2.20849	-0.716517	0.0288693	0.469835	-0.725048	1.47708	-1.4107	-0.99185	-0.368894	-0.41125	1.98304	-1.38237	-0.689848	-0.663462	-0.386348	1.52622	-1.93204	0.288153	2.26597	-0.862952	-0.115419	1.18913	0.999186	-2.062	-1.34622	0.826187	0.886429	0.607933	0.181303	-0.922333	-0.460666	-0.444942	-0.937014	0.0551303	0.243573	0.732207	-1.03049	-0.0340096	-1.52031	0.625938	0.516942	-0.286869	1.93637	-0.0372656
cg25657700	-0.669944	0.146498	-0.81571	-0.63799	-2.44885	-0.682341	0.0473578	0.109601	-1.45924	-0.724142	1.98415	-1.40887	0.268832	0.0199681	-0.682686	-0.0842936	-0.20501	-3.62779	-1.37602	-0.37306	0.392989	0.526512	1.90573	3.231	-0.722497	-0.982659	1.68066	0.676067	-1.58777	-1.84153	-0.991093	-0.822427	0.246389	0.952027	-0.567742	-1.16946	-2.04213	-0.361851	-0.136096	-1.11898	0.982365	-1.50357	-0.481693	-2.85178	-0.860254	-2.72699	-1.5932	3.88398	-1.82129
cg21870668	-2.21231	0.263713	0.165179	-1.50295	-0.312999	0.716533	-0.904275	0.908948	-1.00942	-1.01767	1.96143	0.257902	-1.87512	-0.295098	0.658653	-1.87837	-1.29442	-1.72025	0.794014	0.587351	0.307206	0.106593	1.92812	2.63093	1.00533	-1.61715	0.91869	1.0815	-3.23623	-1.00838	-0.0770263	-1.4239	0.39721	2.18264	1.62434	-1.33435	2.55827	-0.121372	1.02783	-0.0559372	0.718628	-2.33168	-0.979813	-0.275061	2.04642	0.782031	-0.198359	3.12448	0.339343
cg18506672	0.189622	1.32263	-0.0904749	-1.46396	-1.11681	-1.20398	-0.157553	-0.428277	-0.647118	-0.116555	-0.650437	0.119243	0.487987	0.053923	0.0486465	0.926986	-1.3327	-2.26733	-1.009	0.1363	-2.32717	-0.241693	-0.766925	0.994648	-0.037827	-0.24813	-1.26785	-1.33037	-2.61851	0.582313	0.776667	-0.14125	1.12903	0.402145	1.21618	-1.80229	0.928657	1.48379	-0.533071	-1.89766	-0.0273704	-0.693762	0.436317	0.703168	-0.619589	0.826317	0.0109368	-0.647164	-0.0561077
cg02125271	1.95221	1.09408	-0.369671	-0.839016	-1.73945	0.44486	1.89475	0.296986	-1.16591	0.72003	-0.348542	0.664325	-0.019579	-0.350336	-0.0315054	1.87173	0.0170705	-3.01716	-1.39245	1.6125	-0.813343	-0.741898	-1.37588	1.79516	0.111722	-1.12675	-0.749407	-1.60847	-4.13394	2.63653	1.15283	0.160052	1.36841	0.774073	2.31759	-1.51409	2.076	2.84733	0.232971	-4.7375	0.427896	-2.13552	0.570068	2.44188	0.0240828	2.28504	-0.62079	-0.707546	0.843923
cg26875073	1.07974	0.151462	0.503018	-0.968087	-2.99452	-1.00219	-1.35434	0.530842	0.168144	1.3483	1.41913	-0.462017	0.90042	0.867748	0.138927	0.246556	0.26792	0.00901872	0.422042	0.63831	-0.628469	-0.758387	-0.842637	2.97533	1.02031	-0.374583	1.08096	-0.0501688	-4.24499	2.95112	1.80043	0.235326	-0.0783094	-0.333204	2.26254	-2.73779	1.19104	2.97836	0.184829	-1.36202	2.17329	-1.64322	-0.66801	0.200296	0.224717	-1.76489	-1.5255	-0.92677	0.714347
cg22159025	1.93316	1.20887	-0.365823	0.639302	-0.780212	0.48548	0.388838	-0.484309	-0.397127	0.178555	-0.654862	1.14186	1.5129	-0.424047	0.167253	-0.449515	-0.409691	-0.787894	-0.627757	-0.0651644	-1.27476	-1.36395	0.677279	0.378277	0.0619894	-0.0510764	-0.527151	0.903314	0.365509	0.253705	2.28232	-0.380529	0.229591	0.545293	-0.642559	-2.41297	0.492365	0.461646	-0.198515	1.20064	0.368602	-0.800951	0.311859	-0.540798	-0.0187157	1.70687	-0.575934	-0.0603617	0.547313
cg22555495	-0.215519	0.622004	-0.942415	-0.423879	-2.89569	-1.53149	-0.0424658	0.726566	-0.812188	0.561496	-0.331775	-0.36538	0.112215	0.349627	0.202117	0.323752	1.27407	-1.73844	-1.12118	0.636337	-1.46099	-1.73026	-0.920714	0.610671	3.42327	0.0594258	-0.262895	0.431075	-0.379943	-0.781143	2.02091	0.0115073	0.154944	0.444512	1.1815	-0.850125	-0.95718	0.546222	0.0300704	-0.0902648	-0.766947	-0.939935	0.438216	-1.63885	-3.07951	-2.11864	0.139279	-0.0153895	-1.09968
cg13073261	-1.3205	1.22426	-0.467335	-1.81161	-5.63383	0.427157	-1.03964	-0.702997	-0.80466	0.492142	0.191469	1.45647	1.44434	1.30274	-0.0140114	-0.690033	-2.22055	-0.491075	-0.909227	-0.163564	0.142466	-1.94871	0.860851	3.24183	0.197279	2.14833	0.871572	0.76495	-9.75033	-0.929898	0.655386	-0.811873	0.904913	-0.483243	2.0866	-0.955785	-4.39344	0.00532832	0.933893	1.79	0.840376	-1.01262	1.11534	1.83549	-0.777736	3.39741	0.118567	0.881906	0.206412
cg24333473	6.92401	2.40363	0.996506	-0.841529	6.47645	-0.870805	-0.778579	2.45646	0.855878	0.700857	0.253837	-0.954688	1.80353	1.4196	1.42464	-0.756922	-1.62043	0.30956	0.608022	1.47653	1.12187	-0.530853	-0.464377	3.52885	2.28613	1.06565	0.774864	0.783436	-1.02643	0.543555	1.45898	0.715771	1.09348	-0.515495	-0.215995	-0.10973	0.666327	-0.695988	1.90807	-1.82431	0.642018	-1.78497	4.30408	0.823921	-1.17434	1.07814	-0.10582	-0.338647	0.273006
cg03896694	5.76457	0.139248	0.832349	-0.525486	5.47076	-0.268176	-0.458502	2.47658	0.646699	-1.05392	1.26268	-1.58862	0.879571	0.988136	1.2475	-0.381384	-0.689935	-1.11715	0.358081	1.12483	1.19466	-0.436685	-0.20236	0.722593	0.239728	1.0042	0.371445	-0.100634	-1.37295	0.942007	1.76399	-0.209214	0.890314	0.796232	-0.36364	-1.46612	2.10388	-0.50875	1.01051	-2.5043	0.325278	-1.61883	3.57213	1.46009	0.141436	0.131072	0.947232	-0.037951	0.0962712
cg27136643	6.02625	0.389676	-0.168939	-0.828155	5.59821	0.659913	-2.00667	0.304885	0.170052	-0.467415	0.737814	-2.22062	0.0604187	0.427788	0.217155	-0.0872184	1.11759	-0.938996	0.0565007	0.48347	-0.878326	-0.688027	-0.23365	0.850552	-0.462284	0.256004	-0.0965431	-0.737303	1.63634	-0.443959	0.945575	0.220927	1.19104	-0.154502	-0.0792789	-1.00357	0.983466	-0.0918704	-0.335717	-4.65231	-0.518922	-2.76651	3.2856	1.55622	1.18357	-0.323161	0.8545	-1.4347	0.089931
cg03933495	2.71746	0.0378108	-0.95232	-0.722562	2.73704	-0.411134	-0.866155	0.400496	0.126734	-0.334659	-0.0975241	-1.42652	-1.01525	-0.226464	0.449075	1.1455	0.0632718	-2.41262	-0.466475	0.236719	-1.23197	-0.552271	-1.7181	1.06063	-0.372137	1.07343	-0.36375	-0.00411456	-1.96285	0.0134459	1.07912	0.914247	0.760822	0.0477617	-0.265741	-0.176904	-0.165616	0.655594	0.215049	-1.9106	0.864888	-0.855531	2.67507	-2.30051	1.4417	-0.381229	0.0840256	-0.935423	0.849744
cg27460547	5.85175	-0.337208	-1.17994	-2.17557	4.45232	-2.58929	-0.860355	-0.137854	-0.277744	-0.124856	-0.372768	-0.940321	-0.0802935	-0.436559	-0.88726	0.65589	-1.43009	-1.33083	-0.660149	0.400369	-0.319803	-0.553237	-0.0714128	0.735171	-0.526853	-0.266468	-0.269665	-1.30038	-1.68616	1.84336	1.47248	-0.27668	0.623408	-0.113816	0.440797	-0.660183	0.796903	0.442887	0.62127	1.08336	0.30644	-1.16812	3.26683	-0.544177	0.77466	-2.15478	0.366696	0.0642369	-0.129961
cg14654875	6.77929	-0.156132	-0.261884	0.217663	5.59608	0.177104	-1.01722	1.46519	0.328383	-0.878182	0.351608	-0.329828	0.873054	-0.0061079	0.91353	0.827789	0.447026	-0.234726	-1.76803	0.779854	0.476149	-0.548863	-0.333813	1.88673	-0.190771	1.48397	-1.80452	0.0814417	-5.99	-0.721164	0.884367	-1.23815	0.148695	0.354961	0.645719	-1.30412	0.327485	-0.766291	1.04208	-0.260869	0.921228	-2.50332	3.12643	0.89362	2.44181	0.14995	0.950678	0.218225	-0.121389
cg10406676	4.7359	1.5528	-0.457122	1.06318	4.67273	-2.1282	0.041707	1.75464	-1.21227	-0.0106475	0.624839	-0.514227	0.046041	-0.00693077	-0.599486	-0.140315	-0.752875	-0.302213	1.8769	1.28987	-0.240462	-1.85618	-0.105703	1.57655	-1.39454	0.250668	0.827749	-0.752604	-2.1874	1.04561	0.714263	-0.44728	-1.01768	0.284961	0.641564	-0.31571	2.76379	0.797112	0.0139683	1.86752	1.3397	0.921376	3.80512	2.88037	2.75852	3.02079	0.633568	1.01525	0.929455
cg06121207	6.95375	1.76739	-0.44296	-0.238418	6.43632	-1.05989	-0.281012	0.0838309	-0.971556	-0.548796	0.969346	-0.623695	0.992836	0.950374	0.132996	1.64795	-0.534184	-0.684235	-1.1044	0.122075	-1.58842	-0.405403	0.56121	0.954062	-1.00944	-0.720528	-0.82325	-0.480873	-2.55823	-0.243057	2.30004	-0.295086	1.35043	0.257041	1.00495	-1.77009	1.71682	3.37876	0.540115	0.495532	0.452602	1.75853	3.74416	1.18261	1.61678	1.67633	-2.74865	0.757811	-0.0999126
cg20646939	-1.31873	0.185651	-0.220688	-1.84899	-7.05495	-1.46394	-1.43495	-6.66392	0.717486	-0.953433	0.475858	-0.15451	-0.714414	-0.293532	0.391478	-7.82304	-1.40134	-2.45221	-0.93745	0.217104	-0.859625	-1.2926	-1.62151	0.444334	1.02773	-0.490923	-1.02135	-0.125753	-5.02097	-2.37943	-0.640318	-1.20044e-05	0.127269	-0.180313	0.408808	-4.15541	-0.441575	0.364596	-10.4497	2.97812	-0.897214	-1.62751	-2.73974	-0.708097	-3.99061	-0.102429	-0.626975	-0.414748	0.0274951
cg06855497	-0.182462	-0.401187	0.027593	0.727956	-8.8133	-1.42099	-1.96476	-7.74894	0.418905	-0.623821	-0.182447	-0.657898	-0.247676	-0.820273	-0.0794668	-9.77405	-2.28942	-2.19298	-0.241978	1.24163	-0.773552	-1.16882	-1.06064	1.63542	0.153615	-0.586369	-0.870358	0.554291	-5.84039	-1.54643	0.417548	1.12144	-0.16865	-0.0864337	-0.365823	-5.15688	-0.629452	0.777723	-12.2718	3.32189	-0.64024	-1.52278	-3.35801	-1.70366	-6.35843	0.35126	-1.24583	-0.594093	-0.138081
cg15576576	-0.765467	-0.0423416	-0.487761	-0.556195	-4.12512	-0.662992	-0.803057	-3.01781	-0.115044	-0.19836	-0.183178	-0.499481	-0.356227	-0.499519	-0.386338	-4.11111	-0.466253	-0.424289	-0.463747	-0.468264	-0.677662	-0.244188	-0.586882	0.180082	-0.00186038	-0.379687	-0.989801	-0.299011	-2.33608	-1.26888	-0.0399023	0.0917295	0.237862	-0.654927	-0.475523	-1.95896	-0.0472027	-0.336942	-5.58942	0.835366	-0.422499	-0.826581	-1.08247	-0.64993	-1.64706	-5.88021	-0.484423	-0.36137	-0.220974
cg22475353	-1.87439	0.997426	2.5328	-1.52635	-3.68154	-0.717309	-2.73654	-2.81736	0.269402	0.441291	-0.696764	-0.67127	1.42769	0.399805	1.04828	-3.9109	-0.0184989	-1.25335	0.858441	2.34186	-0.164671	-0.497537	-0.833905	3.47338	1.39742	0.145392	-1.11166	0.29262	-3.171	-3.55962	-0.674536	-0.44216	1.86166	-1.04107	0.798474	-1.90923	0.783987	-0.542544	-4.05541	-1.59447	-0.320309	0.958311	-1.53336	-3.5008	-3.0244	2.04694	-2.36742	-1.19407	-0.8936
cg27296330	-1.56143	0.843133	0.819231	-1.35793	-3.78683	0.449829	-2.61449	-3.59941	-0.141306	-0.40133	-0.460111	-1.92923	0.132272	0.155822	-0.00410777	-4.17556	0.332973	-0.884698	0.465518	1.00922	-1.12822	-1.05784	-1.25337	4.20642	0.884791	-0.66258	-1.23345	-0.216299	-3.27237	-2.91299	0.564416	-1.08249	0.375703	0.00751944	-0.050657	-1.99369	0.470925	-0.304569	-4.45984	-1.09002	-0.981255	0.929529	-3.14551	-3.03229	-1.94735	2.2157	-1.6641	-1.3767	-0.425756
cg15607708	0.12214	1.05325	1.04185	1.43469	-1.3399	2.57033	-0.71787	-0.97262	0.565645	-0.0441398	-0.460647	-0.86347	0.398168	0.813268	0.661038	-1.50965	0.676666	2.27392	3.08509	0.154401	0.0569257	-0.831308	0.463615	6.75345	-0.00047877	-0.188377	-0.610591	-0.426929	-0.203428	-1.05783	1.30883	-0.791117	-0.491077	-0.326575	0.516195	-1.17987	0.687439	-0.409259	-1.38377	0.657414	-0.505907	0.593078	-1.24312	2.10344	-0.475976	2.30311	-0.433988	-0.4306	-0.316371
cg05338009	0.11613	0.563514	0.632463	-0.593206	-3.05832	-1.70328	-0.207816	-0.116296	-0.430376	0.27832	0.520391	0.322511	0.743861	-1.77637	0.921836	-0.394885	-0.300628	-0.4898	-0.139258	0.946526	-0.449395	-0.371507	-1.9957	0.667491	0.353941	0.120097	-2.4394	-1.69399	-2.74805	-0.012013	-1.46819	-0.328805	0.655517	0.471809	0.471122	-0.438095	-2.02413	0.659101	-0.0684451	-0.0841722	0.63819	-0.0404703	0.425306	-0.515005	-0.919759	-1.04212	-0.0281022	0.0849112	-2.31826
cg03499639	-0.561697	-1.02567	-2.35045	2.24567	-5.75235	-1.68315	0.242669	-3.88299	-1.05212	-0.565907	-0.731968	-0.110729	-1.80627	-0.0776276	0.847871	-5.84796	-1.36063	1.85392	0.432609	0.995578	-0.780358	-2.80919	0.00387983	2.76818	0.855606	2.0546	-0.421383	-0.647901	-5.46979	0.609174	1.09281	-0.516416	1.83525	-0.119175	1.51909	-2.35638	1.61474	-0.545803	-5.9093	-0.774461	1.25365	-2.29363	-3.02895	2.88818	-1.12263	1.67931	-1.8092	-0.000914338	-1.21624
cg06860848	-0.711793	0.316438	0.328247	-0.98794	-9.3686	0.00907719	-0.507383	0.00104466	-0.619615	-2.35793	-0.26011	-0.892792	-1.35068	-0.0102186	-0.987543	-1.5154	-1.56116	-1.41981	-1.02623	-0.109073	-0.0709219	-1.02937	-1.64857	1.49921	-2.40858	-0.965224	1.03368	-0.937382	8.07531	-2.16992	0.629645	-1.22343	-0.0659003	0.94412	-0.107504	-1.08921	-2.27615	-1.15618	0.630813	0.897486	-0.740619	-2.19323	0.708888	1.77833	-2.75841	0.332626	-1.09738	-0.846808	-1.33831
cg03113572	-1.71964	-0.569905	-1.48237	-0.881939	-10.4073	-0.339432	-0.988895	-1.00268	-0.732439	-0.744746	-0.498524	-0.263087	-0.263873	-1.02409	-1.06022	-1.321	-2.68993	-2.78744	-0.519469	0.262549	-0.451571	-1.4096	-0.494743	0.490103	-1.92141	-0.977431	-0.0887898	0.293238	9.04424	-1.27138	-0.575214	-0.522604	-0.334617	-0.115041	0.435309	-1.7652	-4.31509	-0.73272	-0.4599	0.953845	0.0871775	-0.459419	1.75316	1.37182	-0.804614	-1.16183	-2.88365	-0.514994	-1.37717
cg19696891	-0.947525	1.04521	1.67817	-1.22183	-4.2312	-1.31774	-1.10197	1.90663	-0.848233	0.307882	1.11094	0.0071633	2.39283	0.129559	1.68588	0.0495569	-2.18696	-1.08007	-0.356145	2.03338	0.316069	-0.793081	-0.38377	2.3125	-0.0329858	0.0380932	-1.72489	0.742043	-4.14421	-1.01535	-0.457167	0.212701	-0.0716883	0.143969	2.16092	-0.172731	-2.08255	0.871904	1.71735	0.183461	0.945612	-1.31279	0.527743	-2.28963	-1.19572	-2.82607	-0.434369	0.128809	-0.520824
cg20071427	-1.66796	1.4428	-0.113774	-0.910416	-8.674	-4.10811	-0.327135	0.32077	-1.59915	0.323274	0.0692189	-0.26111	1.52952	-0.28956	-0.284844	0.604639	-4.02701	-1.68134	-0.902609	0.584399	-0.971309	-0.713746	-0.560605	0.958783	-0.316453	-0.562566	-2.52162	0.432276	-5.24097	0.750897	1.3393	-2.11761	1.33675	1.00841	0.63409	-1.61462	-3.3991	0.463431	0.406888	-0.701153	0.651036	-0.633566	-0.0485043	-2.57025	0.135653	2.65384	0.567276	-0.390237	0.908195
cg15473155	1.50962	0.921053	-0.65867	1.63456	-8.77218	-0.536995	1.23871	-0.139719	-1.15907	-0.336327	-0.0738775	-1.03201	0.141612	-1.0498	0.827581	-1.87056	-1.30401	-0.349283	0.113149	-0.267396	-1.85674	-0.227387	0.101721	2.3787	2.46505	-1.17705	-0.624253	-2.37422	6.88504	3.19542	1.99512	0.211326	0.876157	0.107867	-1.10363	-1.23855	-1.39627	0.396718	-0.674484	-2.29059	-0.901923	-3.52473	-0.393146	0.508998	4.77309	-1.5548	-0.192754	-1.94364	-0.270317
cg19041006	0.350942	-2.39577	-0.531903	1.60725	-9.32554	-0.437273	-0.396185	-1.46697	1.12973	-0.974189	-0.0957088	0.757795	-2.23952	0.945115	-1.18762	-1.88281	0.461912	-1.6611	1.07438	0.26641	-1.01605	-1.65074	-2.20449	-0.860931	-0.568106	0.484355	-0.363343	-2.21092	-10.23	2.07674	1.3106	-0.976456	-2.00692	-0.0696976	-2.46565	-0.703433	-1.92094	0.0074964	-0.624646	-0.810646	-1.10689	-1.26081	-0.0400288	1.81695	0.445832	-3.14749	1.48851	-0.374242	-1.22311
cg17663463	1.19983	-0.682511	-0.636122	2.37464	-5.75969	-0.241196	5.79401	-1.11416	0.780383	-0.335773	-0.266639	0.490932	-0.814591	0.505517	0.0168305	-1.11762	0.819686	0.982322	1.01211	0.927214	-1.23905	-1.32794	-0.494022	2.62708	-0.0312081	0.352691	0.963142	-1.64244	-7.35153	2.88911	1.54913	-0.965947	-1.08088	0.775135	1.58884	-0.576945	-0.975676	-0.103954	0.393737	0.866707	-0.588708	-2.34345	-0.266669	2.68449	-0.673247	0.926984	-0.181942	-0.44714	0.213654
cg19771589	1.90786	-2.19842	0.219034	0.268651	-9.40129	-2.47092	-1.43865	-0.0319728	1.40274	-1.26402	-0.361724	0.748929	-1.857	1.38967	0.52979	-1.29881	0.910638	-1.60819	0.879423	-0.368098	-2.3735	-0.354261	-1.69292	2.32786	0.254168	-0.511323	2.32159	-4.27729	-7.26994	2.47921	1.1337	0.107238	-1.22698	-0.267275	-2.02885	-0.693497	-2.50707	-0.939044	-0.0995564	-0.711155	-1.34107	-3.2502	1.12889	0.76398	-4.08762	-3.18895	2.00307	-1.48973	1.26974
cg02793099	-1.64743	0.109988	0.687465	-0.401184	-8.17651	-1.08467	-0.30555	-0.386272	-1.132	0.988066	0.109293	-0.319962	0.597521	0.857988	0.531588	-2.09418	-0.871314	-1.14331	0.987916	-0.37584	0.204846	-0.936034	0.697034	1.24303	1.39595	-1.05575	-0.87337	0.755229	-3.45302	2.94956	0.827635	-0.104202	0.997354	1.21751	-0.381062	-1.03766	-2.88361	-1.39749	-0.358753	-0.253936	-0.315129	-2.33585	0.922736	-0.441504	-5.66189	-0.59556	1.12278	-0.271492	1.22344
cg01656470	0.107465	0.922155	-0.317343	0.193602	-6.37705	-1.37673	-0.953296	-0.0249013	-1.25181	-0.840158	-0.447347	-0.466273	0.770399	-1.34398	0.625988	0.215545	0.559631	-0.876798	-0.397594	-0.877643	-0.918561	-1.29233	-0.676115	0.892628	0.165756	-0.267774	-0.114447	-0.389243	-0.403933	3.30143	0.427167	-0.552328	2.08655	0.972837	-0.606733	-1.13688	-2.17043	0.523335	-0.296675	-0.589341	0.160521	-2.51082	0.907293	-0.180589	-5.98019	2.49597	1.19581	-0.660945	0.675494
cg27519373	-0.619183	-0.118692	0.130596	0.0459217	-2.56895	0.692187	0.181333	0.477933	-0.0897485	0.253052	0.426308	0.594433	1.12271	-0.508217	0.298781	0.896496	0.323415	-0.197891	0.582797	-0.335741	-0.821519	0.242629	-0.890692	1.31644	0.202845	-0.0802743	0.465534	-0.340695	-0.223184	1.7472	0.666998	-0.362459	1.28783	0.12905	0.320919	0.337282	0.736583	0.655914	0.0169827	1.42916	0.8564	0.120749	0.171164	1.49176	-2.59634	0.20282	1.09739	-0.289092	0.330758
cg18516833	0.332847	-0.154155	-0.417486	0.0690024	-2.32598	-0.581281	-0.0367913	0.210205	4.6476	0.514218	0.130074	0.235168	-0.321128	0.0935208	-0.642667	-0.830138	-0.629693	0.598345	0.0774488	0.2606	0.384791	-0.503787	0.168844	1.64521	0.0645533	0.131092	0.12565	0.790266	-1.60751	0.289846	0.979039	-0.665319	0.847509	-0.542692	0.741203	0.27785	-0.424495	0.0977918	-0.0696836	0.259488	-0.181438	-1.21112	0.215839	-0.629052	-1.05334	-0.244577	-0.386509	-0.64011	-0.046857
cg07310951	-0.903939	0.295047	-0.83546	0.24674	-9.33874	-1.24077	0.624726	-0.211322	-0.0693325	-0.0456541	0.334073	-0.678473	0.191061	-0.221412	0.0235309	-0.933904	-0.608768	-1.85488	-1.3766	1.3306	0.38753	-0.861219	-0.789878	1.60336	0.00635896	0.371476	-0.00133335	-0.487564	0.363651	0.817054	0.345558	0.23659	-0.539046	-0.338446	2.31801	-0.236014	-2.27558	1.6385	2.24677	0.521463	1.88667	-1.24634	0.161208	1.32476	-1.97703	1.39439	2.2033	-0.766147	-0.330598
cg02478023	-0.409646	-0.604404	-0.910681	-1.74891	-5.59226	-1.94912	-1.96527	-0.195783	-0.978499	-0.770745	-1.29581	-0.632758	-1.00021	0.042254	0.135975	-0.282834	0.568086	-2.58109	-0.906268	-0.0539183	0.346227	-0.17598	-0.707404	-0.594469	-0.268571	-0.331066	-0.349416	0.343412	-3.31445	1.64699	-0.340394	-0.615943	1.05537	0.449027	-0.0467062	0.0911055	-5.09568	-0.715746	-1.20947	3.64545	-0.69521	-3.2858	0.358297	1.35011	-3.32775	-3.04978	-0.339052	-2.16449	-0.243388
cg22354595	-0.245566	0.20398	-0.506774	-1.63753	-5.02594	-1.98866	-2.12456	-0.534978	-0.469109	-0.506875	-1.03823	0.0661647	-1.11382	0.732121	0.312284	-1.29101	0.460589	-1.83847	-1.62096	-0.310993	0.0715972	-0.109223	0.333511	1.8147	0.649976	1.3823	-0.319078	-0.92686	0.115279	0.665127	0.351267	0.992148	0.366202	1.2179	0.605681	-0.913931	-3.87106	-0.389003	-0.5366	-0.268241	-0.372163	-2.90452	0.756474	0.00646683	-3.79749	-0.626352	-0.924461	-1.54097	-0.462807
cg19335327	0.331775	-0.579506	0.407732	-1.64102	-8.27791	-1.36268	-3.43393	-0.071562	-0.600867	-0.181086	-0.424226	-1.92176	-1.24886	-0.0639661	1.06185	-1.59455	-0.509136	-3.62192	-1.20597	0.111398	-1.39402	-0.0583518	-0.789003	2.24298	-1.12308	-1.02262	-0.928858	-0.369903	-1.86751	-0.349122	1.0086	0.459247	1.12573	1.48811	1.22473	-1.94894	-2.9576	0.299521	-0.0788369	0.327287	0.504464	-0.00563254	0.694303	-3.28358	-3.69263	-2.37663	0.113392	-0.984112	-0.531141
cg14849423	0.0583933	-0.858672	-0.21834	-0.37081	-6.29796	-0.10795	0.682829	1.43088	1.69954	1.07274	-0.559051	-1.16912	-0.132558	1.33999	1.13458	-0.849542	1.64018	-0.0137299	1.61701	1.60872	0.747033	-0.631085	-0.392473	4.02223	0.866135	1.10213	0.315245	-0.440513	3.76803	0.0322106	1.27872	-0.827638	0.957352	-0.157998	1.74282	-0.854242	1.05335	-1.05501	-0.318049	0.986982	0.548958	-0.754829	0.663136	-0.829694	-1.37345	-1.07749	0.711154	1.3177	-0.431203
cg15777825	-0.748661	-2.09115	1.46909	-2.68897	-8.48882	-2.15678	-1.09977	0.290098	-0.709993	0.812469	-0.364645	-0.916578	0.199767	0.42562	1.14021	-1.96923	-0.395458	-2.07873	-0.966854	1.57818	0.281395	-0.260888	-2.26413	1.91012	-1.39941	-0.688183	1.53341	-0.239784	-2.09942	-1.48971	0.514243	-2.7382	1.61271	0.214718	1.27293	-1.52197	0.0742025	-0.188678	1.07978	-7.89665	-0.264384	0.605169	1.53476	-4.09325	-2.99655	-8.95683	-0.855541	-1.00709	-0.192014
cg10204755	0.066582	-2.4285	0.0944273	-3.39815	-10.3862	-2.43191	-2.60227	0.307308	-1.26119	-0.0991765	0.265941	-1.17267	-0.16902	-0.479415	0.510899	-1.954	-0.757374	-2.04214	-2.23883	1.23051	-0.80684	-0.23749	-0.992109	1.81316	-1.27431	-0.778439	0.200016	-0.741417	-1.18519	-1.80707	0.420302	-2.62831	1.35098	0.287246	-0.0897346	-1.35197	-1.47909	0.0423364	0.13896	-5.20178	-0.600664	-0.229767	1.05752	-4.04361	-3.74391	-8.94162	-0.88134	-1.17017	-0.329077
cg12205903	0.440188	-3.01626	-0.192572	-3.46809	-8.66664	-4.91545	-4.76915	0.434941	-3.02437	0.716096	-0.0605401	-2.10893	1.04034	0.7789	-0.435528	-3.46566	-1.85905	-2.30193	-2.48976	1.35818	1.74457	-1.19815	-1.76771	1.29783	-1.24627	-1.69439	1.30731	-0.899828	-3.89985	-2.24648	-0.00953035	-2.58592	1.60442	-0.800478	0.337781	-0.538817	-0.876078	-0.463906	1.12234	-4.95947	-0.709312	-0.107052	0.927343	-4.25958	-4.38383	-9.04034	-0.0640519	-0.774719	-0.343481
cg26349266	-0.375561	-2.10916	-0.270071	-2.90604	-7.33155	-1.71893	-0.750947	0.166853	-0.366207	0.0772182	-0.79504	-1.71542	-0.629043	-0.82124	0.831721	-0.62251	-0.286595	-2.01663	-0.592147	0.545385	-0.395909	-0.100567	-1.06589	1.36481	-1.82851	0.15705	1.42317	-0.427178	-5.34199	-1.43971	0.289487	-1.56075	1.07102	-0.561031	-0.608102	-1.25623	-1.47041	-0.686064	-0.106988	-3.70955	-1.51123	-1.21578	1.09428	-1.87543	-0.931946	-5.41466	-0.437748	-0.259455	-0.89261
cg02162069	0.943006	-1.43617	-0.403912	-2.19816	-7.18102	-4.09452	-2.4861	-0.737351	-0.313119	-0.818974	-1.08924	-1.58287	-0.831434	-0.212336	0.572046	-1.18556	0.652882	-4.23063	-2.10703	0.6869	-1.14251	-0.356879	-1.80063	1.7369	-1.81397	-0.146806	0.781915	-1.87824	-7.30826	-2.19079	-1.10825	-1.27112	0.948243	-0.155086	-0.044071	-1.39344	-1.67248	-0.00575023	-1.36222	-2.36556	-0.794553	-0.582759	0.610373	-1.39662	-2.71131	-2.57171	-0.819488	-1.90499	0.293498
cg13960339	-0.152431	-1.55941	-0.817416	-0.477266	-7.76394	-2.46575	-1.04359	0.50602	0.888039	-0.295531	-0.49624	-2.3793	-1.15291	0.290528	0.158868	-0.552976	0.208587	-2.61619	-0.0603598	1.74822	0.0468526	-0.828484	0.0286961	1.7536	-1.781	0.462153	1.2782	-1.15099	-5.32907	-2.04408	-0.400722	-1.18599	0.953669	-0.298112	-0.075721	-1.37255	-1.1825	-0.158435	0.157654	-1.13097	-1.71614	-0.382334	1.04524	-0.555185	-1.54559	-5.28111	-0.379982	-1.15833	0.17321
cg13369939	0.126829	-2.29111	-0.13858	-1.62979	-9.12603	-2.60072	-1.31289	-0.639112	-0.260395	-0.0901728	-0.362887	-2.38206	-0.589874	-0.59836	1.19796	-1.2817	0.303787	-1.6182	-0.64583	-0.0420377	-1.45924	0.191337	-1.77561	1.30076	-1.38541	0.479837	0.377015	-0.440446	-7.84779	-2.46632	0.0824946	-1.34406	1.10598	-0.712248	-0.12183	-1.21706	-2.64077	0.0411804	-0.0902515	-5.79044	0.124487	-0.748751	1.51757	-1.60435	-2.31129	-9.1771	-2.00106	-1.81748	-1.54295
cg20628335	-0.276368	-2.34416	-0.315804	-1.80212	-7.70443	-2.61664	-1.83858	0.655788	0.478361	-0.435443	0.363109	-1.48209	-0.839159	0.497138	0.645547	-0.933426	0.240548	-3.48939	-0.718364	0.0235027	-0.515947	-1.15041	-0.587793	2.02739	-2.02227	0.093682	1.04813	-0.371375	-5.82901	-1.59108	0.998655	-1.12818	1.17913	-0.712146	0.696106	-1.16313	-1.07179	-0.0432827	0.258461	-4.02157	-0.20639	-0.609706	0.906926	-0.932004	-2.31297	-5.56634	-0.728129	-0.930167	-0.413665
cg22294267	-0.853889	-0.130085	1.18083	-1.41302	-13.433	-1.41332	1.10445	1.04865	-0.801584	1.28934	-0.0164103	-1.51351	-0.257316	-0.570812	-1.00701	-1.11823	-5.19898	-3.344	-2.01625	0.376907	1.19274	-1.6074	0.682393	2.01427	-1.77231	-0.668021	-0.0707967	-0.245228	-19.9089	-1.75641	1.2176	2.12609	3.11363	0.348805	1.40684	-1.93583	-2.80835	0.983431	2.16755	4.0415	0.788922	-1.12847	0.45066	-3.66904	-1.00529	1.81529	-0.957753	0.863107	-0.592125
cg19098268	0.266718	-0.913962	-0.653179	-1.48803	-7.14023	-0.314701	-0.80532	0.688494	-0.132862	-1.84971	-0.68374	-0.95895	0.145963	-0.20216	-0.816816	-0.121016	-3.55371	-2.08097	-1.383	0.263668	-0.0586131	-2.16921	0.425894	1.52007	-1.29275	0.712739	-0.440215	0.147738	-8.24127	-0.552116	1.82219	0.0043281	0.834576	1.92373	0.519752	-1.94662	-1.04939	0.715872	1.36644	-3.65277	0.112004	-0.730645	0.890133	-0.474521	-1.62153	3.22851	0.520811	0.334962	0.392665
cg24844423	-1.97074	-1.09836	-0.187949	-1.0177	-7.37061	-1.3356	-1.40471	1.0816	1.25132	-2.29032	0.523324	0.301875	0.594391	-0.503014	0.670941	-1.47783	0.209399	-1.64809	-0.212497	0.0777359	-0.658235	0.830774	-0.230061	-0.156657	0.775062	-0.175965	-0.161169	-0.258998	-3.83655	0.279141	0.42871	-1.71602	1.18305	-0.460878	-0.808746	-2.43674	1.10344	1.26319	0.414987	0.189113	1.08861	-0.048081	0.795443	-0.833472	-1.01667	-1.15243	-1.39295	-1.83047	-1.7221
cg15678121	-3.0924	-1.05263	1.13431	-1.45723	-4.92557	-0.390577	-2.82247	-0.187922	-0.263105	-0.0844942	-0.405614	-1.93983	-0.497333	1.52233	0.846493	-0.762032	-1.24576	-1.41436	1.11174	0.714895	0.152813	0.411732	-0.414479	0.92708	-0.916626	0.889083	-0.374149	0.226351	-4.08378	-1.88324	-0.115228	-0.558436	1.46725	0.678793	-0.00133517	1.20849	-1.74632	-0.518546	-1.14836	-0.418355	0.638195	0.175464	0.777848	-2.10418	-0.829741	-2.85317	-1.78739	-1.43635	-1.78784
cg12032885	-2.01697	0.758637	1.01294	0.169159	-0.000413916	1.09097	-0.741647	2.11326	0.848557	-0.703449	-0.764244	-0.190254	-0.327604	0.607753	0.835034	-0.290717	0.190635	0.257766	-0.418463	0.796522	1.34248	-0.435818	0.0872944	-0.138884	3.25562	0.234598	1.13324	0.706917	1.62427	1.7515	0.0433163	-0.39907	-0.0668506	-0.61598	0.687946	-1.87821	2.10136	1.00094	2.33821	-0.49287	2.41268	1.53093	-1.07725	2.05126	0.541486	1.27795	0.384007	0.812561	0.230078
cg25458871	-2.44753	-0.0919704	-0.415666	0.137234	-6.61124	3.62016	-0.335253	0.326204	0.0572814	-0.160314	0.500447	-1.44549	-0.0933441	-0.655387	-0.247072	1.46101	-1.05107	-0.364739	-2.37214	-0.277584	-4.04091	-0.385555	-0.537409	0.384002	1.25343	1.594	-0.230793	0.677496	0.387972	-2.25747	-0.77023	-0.578703	1.83152	-1.46059	-1.09259	-2.14134	0.579442	2.35702	1.71283	1.91961	1.28388	1.06162	0.149042	0.798885	2.49261	1.12643	-1.73522	-0.975696	-0.194302
cg18668753	1.01535	0.242029	-0.410519	1.7534	-8.41149	2.27588	-0.387099	0.732364	-0.182912	-0.988517	0.500864	0.681654	0.997379	0.442057	0.606662	0.276344	0.225773	-2.09008	0.132347	-0.0788962	-0.758163	-0.236994	0.0912955	1.76214	0.322366	-0.854613	-0.170301	-0.754199	-3.86137	0.486443	0.43564	-0.632081	0.841253	0.719357	-0.44476	-2.04927	2.07988	0.0448998	0.0358418	1.98237	0.822624	0.657601	-0.676053	1.32111	-1.75961	1.90295	-1.7601	0.79541	2.26719
cg18706888	-0.812997	-0.0897074	0.516404	1.18421	-10.6953	3.07875	-0.0260728	0.320495	0.0195621	0.884998	1.31959	-1.05371	-0.223404	1.0568	1.03454	-1.12204	1.82388	-3.71743	0.474033	1.41732	-2.86415	-6.49307	-1.10301	4.67657	-0.0309161	-2.08517	-0.00212492	-0.261322	-4.65238	-1.36183	0.159493	0.803605	0.407596	1.06944	-0.790393	-2.20677	3.05446	-0.392888	-0.479974	1.59437	-0.427647	0.0559686	-1.86757	0.943595	-4.37236	2.80303	0.332332	-1.37661	-2.02722
cg01054891	-0.762127	0.911494	-1.76604	-1.46884	-5.67134	-1.68743	-0.0692029	1.62231	0.546528	-0.745301	-1.74978	-0.23641	1.93882	-0.482184	1.05178	-0.86176	-0.746076	0.864856	-0.189528	-0.532879	-0.611984	-0.621543	0.907073	0.143397	-0.990256	1.27862	-0.912048	-0.408415	1.15742	1.34583	0.442247	0.440783	-0.035663	1.17321	-0.591598	-0.358488	-2.23508	-0.695832	0.440226	0.849689	0.958854	-0.251366	-0.657155	1.83872	-3.39665	-2.75408	-0.0160202	-2.96664	-0.335856
cg18644235	-1.25645	-0.526359	0.407698	0.172444	-4.26619	-1.159	-0.159702	0.575995	-0.234402	0.741532	0.298621	0.398917	0.608075	0.291734	1.05089	0.717275	-1.05861	-1.23102	-0.729464	0.527499	0.66968	0.426605	0.345445	-0.596447	0.447509	0.692565	0.178644	-0.453633	-5.19256	-2.64798	-0.536059	1.11737	0.585642	1.0168	-0.209245	0.156362	-2.72522	0.418808	1.13438	0.193041	0.0893615	-1.86089	-1.10917	-3.33161	-2.55699	-2.02454	-0.406783	-0.240025	-0.493012
cg13374648	0.874052	0.213988	0.00911089	1.21462	-5.79982	-3.41561	-0.596545	-1.15107	-0.00585354	-0.85342	-0.127755	-0.948824	-0.458256	-0.84577	0.391338	-1.75445	-1.88543	-0.804896	-1.65446	-0.152351	0.111347	-2.11342	-0.475778	0.190375	-0.939131	0.266465	-1.00988	-0.897941	-5.25583	-0.238494	-0.550556	0.829549	1.79208	2.32329	-0.292057	0.0598113	-0.322552	0.974615	-0.750846	0.81245	0.934782	-2.85452	1.097	0.799671	-0.202981	2.22202	-0.282267	-0.752687	-0.728354
cg26917367	-0.91681	-0.183778	0.527052	-1.50308	-5.50986	-2.68198	0.486888	-0.151657	0.237903	0.308969	-0.750443	0.0931495	0.24263	-0.870357	1.07856	0.891569	-2.68587	-3.6148	-0.419985	-0.42098	-1.36916	-0.121883	-0.238689	-3.0848	-0.241841	-0.313791	0.39226	-0.264474	-5.45658	-1.1621	-0.170394	0.874438	-0.929112	0.108058	0.310816	0.0173707	-2.71946	-0.0478642	-0.0841597	-0.461698	0.402638	-3.81731	-0.543918	-2.73988	-3.02479	-3.42466	0.767027	-0.147586	-0.396623
cg25359645	-0.119521	0.0982594	0.228987	-0.383214	-1.40928	-1.80491	-0.714278	0.397316	-0.0787282	-0.103466	-0.230536	-0.966772	0.309534	-0.111714	0.0512943	-0.193678	-1.19589	-0.367284	-0.63845	0.171085	-0.265406	-0.438851	-0.190524	0.761842	-0.021044	-0.380633	0.470315	-0.288812	0.881774	-0.408588	0.917665	0.346122	0.0071507	-0.106627	-0.366077	-2.63239	0.137265	0.117997	-0.087614	-2.26453	0.380811	-0.549707	-0.452258	1.59796	0.0899177	0.379582	-0.222354	-0.446118	-0.555767
cg24607140	0.0235333	0.416751	0.36677	-0.923463	-1.04479	-2.00937	-0.379562	0.0965781	-0.200182	-0.488952	0.464486	-0.385275	0.375987	0.322702	0.313561	0.0204458	-0.157935	-0.235623	-0.882122	0.35004	-0.779752	-0.222858	-0.774997	0.270912	-0.16672	-0.029807	0.00265002	-0.379778	-1.49182	-1.13776	0.327037	0.251606	0.225908	0.0142644	0.621752	-6.29478	0.434576	-0.149803	0.151154	1.00103	0.13821	-1.97199	-0.620678	0.025551	-0.776681	-0.263279	0.317466	-0.19178	-0.4079
cg06000530	-0.481625	0.615382	0.08454	-1.0438	-1.5266	-2.49788	-0.792532	0.329612	0.0647415	0.0357755	1.1194	-0.211985	0.444493	-0.695639	0.578362	-0.23068	-0.420716	-0.95547	-0.919169	0.56745	-0.298876	0.00465927	-0.579726	0.983332	0.192814	-0.686264	-0.224625	-0.534784	-2.14171	-0.0730024	0.414089	0.25408	0.670755	-0.0466788	-0.0583651	-5.65602	0.427741	0.0554558	0.241157	0.289716	0.374283	-1.76523	-0.454756	-0.159262	-0.278851	1.19325	0.717279	-0.265632	-0.451609
cg15815607	-0.415548	0.587436	0.286678	-0.441341	-2.44509	-1.78413	-0.624257	0.709752	-0.0305575	0.4432	0.331738	-0.195781	0.250507	0.302274	0.685892	-0.671906	0.421035	-0.529287	-0.389258	0.457151	-0.418675	-0.679694	-0.40907	1.19152	-0.152052	-0.544757	-0.463458	-0.868965	-2.76687	-0.754909	0.397453	0.441911	-0.275779	-0.404557	0.178084	-5.89722	-0.20854	-0.63591	0.477124	1.0691	0.551247	-1.62067	-1.60266	0.237334	-0.482256	0.141893	0.197623	-0.529102	0.243612
cg25645178	-0.494687	0.859213	0.323019	-1.00231	-1.43436	-1.71825	-0.722001	0.162351	-0.329775	0.0879303	0.714975	-0.3099	0.73638	-0.121715	0.480668	-0.438048	0.371458	-0.936116	-0.508056	0.106228	-0.412353	-0.643682	-0.4127	0.470776	0.345067	-0.781807	-0.210837	-0.256753	1.57073	-0.0932125	0.542591	0.362408	-0.0105724	-0.0770318	0.191235	-4.65669	-0.247185	-0.171705	0.53852	-0.0188277	0.373046	-1.403	-0.709202	-1.09087	0.0911166	0.350177	0.284362	-0.000850221	0.0476513
cg17840843	0.00678516	0.517058	0.0376263	-0.687378	-0.671304	-0.623002	-0.705064	0.433693	-0.0511385	0.213854	0.498763	-0.12176	0.267698	0.54788	0.458144	-0.127303	-0.0995098	-0.439436	-0.513759	0.344997	-0.144167	-0.523137	-0.186376	0.545201	0.32086	-0.104946	-0.60403	-0.415715	-0.804403	-0.0466627	0.410119	0.250389	-0.0839916	0.0933092	0.115685	-2.29187	-0.138321	-0.0164121	0.348521	-0.185668	0.0101159	-0.847277	-0.406332	-0.968437	-0.132637	0.181451	0.441866	0.026355	-0.000729757
cg02146091	-0.367359	0.595117	-0.0370264	-0.598309	-0.903996	-0.946349	-0.671845	0.423684	-0.452178	-0.234654	0.312105	-0.607124	0.390032	-0.254903	0.364433	-0.517563	-0.268699	-1.14958	-0.552809	0.04439	-0.287108	-0.57361	-0.283218	0.423013	-0.118738	-0.557864	-0.490744	-0.562377	-1.24262	-0.342614	0.562287	0.0288749	-0.0594718	-0.0636859	-0.0879398	-3.49043	-0.389816	-0.467262	0.198969	-0.772077	0.00247581	-0.918247	-0.594619	-1.02249	0.136226	0.184633	0.370151	-0.338685	0.164578
cg20129782	-1.22408	0.441364	-0.0918928	0.160779	-1.71686	-2.40407	-0.692035	-0.0796059	-0.354786	-0.550518	-0.0882333	-0.646419	0.359182	-0.211834	0.0730481	-0.0990934	-0.745283	-0.87678	-0.23172	0.387245	-0.558448	-0.416748	-0.486592	0.556752	-0.0991027	-0.108241	0.83404	-0.29071	0.140267	-1.15978	0.165853	0.0148967	0.925677	-0.0850901	-0.06788	-3.23021	-0.812264	0.307636	-0.227378	-1.13837	-0.0345002	1.27782	-0.42001	0.441699	0.66414	0.355893	-0.45865	-0.635827	-1.113
cg23757721	-1.93322	-0.291475	-0.985659	1.59206	-0.786579	-1.53071	-0.84449	-2.08899	0.156478	-1.14972	0.303652	-0.617548	0.161366	-0.914579	0.63086	-2.90108	-2.19584	-2.45959	-1.93055	-1.6001	-2.16109	1.03529	0.789625	-0.803266	1.43377	-1.11449	-0.437974	-0.65696	-1.29853	-0.499732	-0.715216	-0.0464582	0.601958	-0.386461	-0.877795	-3.0812	-2.17033	1.10769	-2.0207	-2.04971	-0.666787	-0.891068	-1.1924	-0.233635	-2.54637	-2.42601	-2.69171	-1.3564	-0.874536
cg26083330	-1.6658	-0.788382	-1.20224	1.83353	-0.210497	-0.834905	-0.417759	-1.9743	-0.609723	-1.12366	-0.318134	-1.45934	-0.163903	-0.923745	0.0644523	-3.89366	-2.62311	-2.7497	-2.01748	-2.51878	-2.47965	1.45236	-0.190833	-0.179487	0.0539943	-1.11579	-1.25544	-1.48262	-3.57132	-1.07196	-0.814811	-0.444895	0.130565	-0.984824	-2.73168	-4.09896	0.525947	-0.49193	-3.02151	-4.2833	-2.25607	-1.60134	-1.91937	-2.07429	-2.7198	-2.21309	-2.9223	-1.16119	-0.829299
cg22551578	-0.128729	-0.276652	0.636552	0.92522	-0.768821	-0.0546699	-0.813169	-0.0491885	-0.238815	0.310689	0.967554	-0.448583	1.42789	0.100539	0.679595	-3.10792	-1.23501	-1.09769	-1.00701	-0.299293	-0.901591	-0.408169	0.0928608	0.190873	1.46372	-0.465758	-0.288311	-0.817985	1.42032	0.552991	-0.154436	0.275507	0.594436	-1.12125	0.432522	-3.11204	-2.86939	-0.216273	-1.40555	3.24782	-0.466653	-3.31572	-1.203	-0.989151	-0.0970783	3.57241	-1.4197	-0.507074	-1.33329
cg04489586	-1.33717	-0.487901	-0.766081	0.788153	-0.962745	-1.78056	-0.522686	-2.03096	-0.352779	-0.579259	-0.120468	-0.697704	0.117784	-0.564079	0.160669	-3.14197	-2.65537	-2.20592	-1.42743	-1.67152	-1.76214	0.687762	-0.301799	0.313706	0.750562	-1.26312	-1.14908	-1.48233	-0.471553	-0.10501	-0.606138	0.20267	1.26362	-0.486919	-0.884018	-3.48564	0.237975	0.406213	-2.57678	-3.496	-1.33012	-1.77965	-1.10743	-2.60454	-1.9843	-1.75585	-2.10913	-0.810718	-1.11258
cg23605670	-0.18751	-0.196961	0.136632	0.627999	-1.21795	0.437926	-1.26785	-0.7226	-1.06926	-0.754434	0.412473	-0.577934	0.856876	-0.397838	0.246465	-3.83296	-1.14702	-2.95524	-1.54879	-1.52839	-1.44033	0.416899	-0.558628	-0.0167436	1.00362	-0.527368	-0.865775	-1.36561	-2.77624	0.124346	0.764091	-0.222187	-0.114987	-1.06678	-1.19221	-3.79785	-2.05945	-0.104012	-1.45661	1.60772	-0.817606	-3.44715	-1.54709	0.655487	-0.835016	2.70475	-1.40337	-1.85864	-1.05173
cg12862537	0.306951	0.154439	0.337967	1.17657	-1.21599	0.19134	-0.705403	-0.903854	-0.702177	-1.0164	0.555758	-0.59466	0.159794	-0.960494	0.169278	-3.08618	-0.681676	-2.26511	-1.74581	-1.35283	-1.44848	0.259762	-0.433144	0.909746	0.616031	-0.662858	-0.945167	-1.49389	-1.58113	0.242561	-0.240805	-0.41694	0.811522	-0.342423	-0.832489	-3.74507	-0.503876	0.385468	-1.64435	1.54053	-0.895521	-2.47096	-1.16528	0.0767962	-0.682064	2.35608	-1.58437	-2.07866	-0.725706
cg10981598	0.898037	0.412252	0.221397	0.398257	-0.921818	-0.0188007	-0.222099	-0.984316	-0.760093	-0.358248	0.269143	-0.380226	0.436324	-0.0787993	0.344692	-3.19064	-0.751658	-2.49899	-1.28209	-0.694227	-1.63066	-0.293866	-0.526935	0.739048	1.33101	-0.870491	-1.15283	-1.33435	2.75049	0.824222	0.390373	-0.122879	-0.218305	-1.09761	-0.769816	-2.98754	-1.74398	-0.227937	-1.75434	2.25298	-0.378466	-2.48408	-1.48148	-0.707427	-0.867112	1.72006	-1.06393	-1.73329	-0.945792
cg20783699	0.165293	-0.561019	0.207988	1.11559	-1.17582	-0.32123	-0.999335	-1.55338	-0.769894	-0.10126	0.645306	-0.476331	0.125847	-0.247951	-0.369267	-4.94368	-0.521258	-2.5961	-0.826356	-1.56304	-1.45536	-0.0282139	-0.440134	0.785725	0.94858	-1.2541	-1.75648	-1.2715	1.19493	0.949762	-0.518512	-0.478781	0.251667	-0.834549	-1.17238	-4.16061	-0.637551	0.296396	-1.48345	2.42901	-0.248491	-3.56575	-1.80748	0.0613303	-0.931651	1.97282	-0.793288	-1.91705	-0.808807
cg25712981	0.639677	0.191819	0.419648	1.76169	-1.60617	0.0543998	-0.150974	-0.61902	-0.166389	0.0808556	0.77523	-0.272084	0.685969	-0.480366	0.630723	-3.35222	0.141689	-1.61444	-0.790285	-0.982098	-1.04847	-1.00609	-0.0593596	0.821616	1.39175	-0.651248	-0.828345	-1.66218	1.43256	0.160823	0.269175	0.621385	0.236919	-0.88784	0.339978	-2.56203	-0.705329	-0.167293	-1.10339	1.3989	-0.600799	-3.15671	-1.31307	0.531993	-1.63676	2.20212	-0.886134	-1.11214	-0.83437
cg03615235	0.96796	0.16052	-0.408201	1.71998	-0.683972	0.0219652	-0.219219	-2.12569	-0.377484	-0.96397	1.50245	-0.660046	0.569006	-0.0956606	0.0474026	-5.05861	0.249669	-2.73681	-1.83819	-1.5239	-1.53961	0.207073	0.0351651	0.803959	1.42838	-1.20559	-1.0567	-2.08818	1.52449	-0.499995	-0.707483	-0.400491	0.495682	-0.610186	-0.64883	-4.54739	-0.917372	1.00213	-1.85136	1.64718	-0.918994	-3.96854	-1.89786	-0.170028	-0.91981	2.61823	-1.48708	-2.02367	-0.792748
cg17643025	1.42669	0.0498414	-1.01617	1.91916	-1.21747	1.81615	0.523015	-1.06549	-0.149572	-0.776219	0.484468	-1.16843	-0.360371	0.067906	0.516386	-4.32265	0.985267	-1.36341	0.28961	-1.40871	-1.62329	-0.598685	-0.238603	0.823721	1.23045	-0.572702	-1.01163	-1.29901	2.63574	0.389527	0.469241	-0.210595	0.850801	-0.236219	0.122261	-3.99716	-0.338082	0.119169	-2.07617	1.41989	0.234727	-2.48373	-2.02457	1.08803	1.46607	2.1724	-0.562291	-1.61558	-0.186195
cg24762053	1.91038	-0.156927	0.121154	2.32866	-0.954999	-0.629123	-1.04765	-1.13102	0.0452916	-0.399673	0.371668	0.0364935	0.571665	-0.219574	1.07966	-3.64429	0.568463	-2.1777	-0.570267	-0.577518	-1.24345	-0.314944	0.592004	0.764222	1.17815	0.0838397	-0.961865	-1.22238	2.84835	0.413209	0.152372	0.219845	0.443306	-0.79456	0.0308671	-3.62933	0.20608	0.89626	-2.22291	1.03868	-0.532259	-2.76913	-1.09584	1.21245	1.35604	2.24368	-0.483929	-1.72094	-0.904974
cg14469070	0.0448612	0.0851547	-0.300915	1.54599	-0.799794	0.317038	-0.122607	-1.54506	-0.90562	-0.0977223	0.195845	-0.557727	0.227035	-0.746759	0.207301	-4.19784	0.0152442	-2.91747	-0.145579	-1.05023	-1.65003	0.288359	0.529968	1.21454	0.792767	-0.368299	-1.12502	-1.40584	-6.85751	0.626543	-0.692305	-0.168105	0.862163	-0.104892	-0.384867	-4.22144	0.100713	0.583629	-2.17114	0.111261	-0.209536	-3.23605	-1.29082	1.00499	-1.27065	1.46128	-0.489822	-1.71001	-1.16795
cg22298088	-0.137129	-0.466075	-0.537136	0.421307	-0.930422	-0.382109	-0.422986	-1.07209	-1.4044	-1.1078	1.0008	-2.07095	0.225899	-0.705796	0.986919	-3.82235	0.270659	-3.94476	-1.74048	-2.23156	-3.40299	-0.0805338	0.182069	0.00777596	0.563224	-0.0462073	-0.428176	-0.611571	1.87585	-0.55375	-0.239466	0.350653	0.978632	-0.044949	-0.383152	-4.28323	-1.82885	0.152652	-2.62412	-0.406038	-1.79887	-4.91478	-0.736874	-0.326682	0.101959	1.71515	-1.12772	-2.38988	0.233048
cg14765818	-1.75765	-0.680998	-1.18097	0.674984	-0.367209	-0.952914	-1.00795	-1.38735	-0.448293	-0.339373	-0.0704067	-0.535368	0.296183	-0.76054	0.426729	-3.80294	-0.764298	-2.14988	-1.54988	-1.54299	-1.21898	1.00203	-0.170828	-0.180162	1.14909	-1.44549	-1.21103	-1.13021	-1.9183	0.27738	-0.476617	0.026522	1.43445	-0.464413	-1.22479	-4.03427	0.823465	0.829658	-2.51762	-2.14741	-0.526802	-2.05262	-1.11164	-2.86983	-1.85547	-1.60705	-2.00435	-1.46262	-1.50419
cg08402058	-0.769768	-0.0515324	-1.37688	0.416132	-0.893647	-0.69995	-0.685523	-1.32064	-0.868323	-0.583105	0.133494	-0.635507	-0.0713401	-0.594979	0.634353	-4.16292	-1.73857	-2.44642	-2.29104	-1.1403	-1.34598	1.14683	-0.407774	-0.142474	1.47921	-1.31063	-1.44375	-1.36363	0.275302	0.354711	-0.131487	0.482674	0.799582	-0.328234	-0.688708	-3.75674	0.0108302	0.642272	-1.73738	-2.39084	-1.18708	-1.89922	-0.718079	-3.36657	-1.39636	-1.02563	-2.09069	-1.17535	-1.42259
cg07156273	-0.854221	0.109557	-0.237269	1.40181	-1.0543	0.263353	-0.694658	-1.29835	-1.48495	0.135863	0.415951	-0.765382	0.122773	-1.78462	0.0455072	-4.12873	0.274427	-2.11503	-1.4299	-0.749017	-1.88434	0.231609	-0.364917	1.16727	0.672961	-0.132985	-1.04788	-1.48363	1.54854	0.615381	-0.64254	-1.96596	0.768894	-0.365393	-0.964984	-3.23405	-0.150897	-0.218603	-2.12349	-3.40825	-1.51017	-3.00304	-1.04341	1.01067	0.0331495	1.11288	-0.249591	-2.37322	-0.471104
cg01466133	0.38419	-0.00800323	-0.142615	1.05019	-1.03273	-1.32693	-0.842289	-1.33951	-0.429751	-1.49339	0.442705	-1.38843	0.506514	-2.81644	0.957834	-3.25873	0.0455596	-3.72754	-1.65238	-1.3745	-2.09828	-0.132272	0.156551	0.830573	0.995011	-1.12551	-1.36691	-1.7384	1.95912	0.356225	-0.438631	-1.38381	0.762235	-0.307343	-1.74702	-4.17532	-1.32939	0.812301	-2.69927	-2.93368	-1.27051	-2.26486	-0.891827	0.420306	0.397876	0.852053	-0.411569	-2.79911	-0.499284
cg24675557	0.0517829	-0.119457	-0.244218	1.9234	-2.05961	-0.237397	-0.132444	-1.26662	-0.417777	-0.879561	0.52465	-1.33893	-0.388293	-0.767179	0.250386	-4.35476	-0.786308	-2.56781	-1.38543	-1.35027	-1.6662	-0.145115	-0.0181157	0.488182	0.933766	-0.59499	-1.18906	-1.0952	0.870205	-0.217904	-0.461715	-0.876511	0.699813	-1.09466	-0.598184	-3.17853	-0.196584	-0.112734	-1.34741	-2.68547	-1.45393	-3.19512	-1.52168	0.783687	0.988485	2.40474	-0.716695	-2.25738	-0.892612
cg20479660	1.171	-0.562185	-1.06297	1.21094	-1.0615	-0.159886	-1.2717	-1.71686	-0.397002	-0.858345	0.688711	-1.47701	-0.199266	-1.274	0.593731	-4.28027	0.02497	-2.40111	-1.85754	-1.38301	-2.30878	-0.150642	-0.140606	-0.230691	1.16471	-0.790377	-1.17586	-1.59897	1.13072	0.331861	-0.242795	-1.32946	0.926664	-0.676349	-1.46925	-3.30725	0.168082	1.07803	-1.88718	-1.16007	-0.68681	-2.30342	-1.10549	0.988537	0.590158	2.20328	-0.0851813	-2.28135	-0.854648
cg22421148	-0.299931	-0.0493499	-0.997184	1.49687	0.130141	-0.432893	-0.924721	-1.38423	-0.337816	-0.851934	0.302813	-0.422625	0.0542289	-0.919243	0.697561	-3.60772	-1.07187	-2.07178	-2.06773	-0.889356	-2.08837	-0.564105	0.574508	0.413206	0.848651	-0.644369	-0.431554	-1.23884	1.17552	0.34314	-1.04099	-0.460148	1.05985	0.355103	-1.24086	-3.03842	-0.182311	-0.0588596	-1.47156	-2.47967	-1.1639	-2.99745	-0.900696	-0.445303	0.0593404	2.23125	-0.641186	-1.6033	-1.38877
cg22510412	0.417074	-0.429327	-0.937618	1.35911	-0.237598	-0.874261	-0.865756	-1.31866	-0.934444	-1.71787	0.105196	-0.912482	-1.22614	-1.45324	0.627829	-3.76991	-0.992843	-3.01175	-2.17484	-1.44868	-1.89323	-0.0775471	0.00710518	-0.370248	1.58528	-1.32237	-1.5583	-2.04417	0.349824	0.60085	-1.31377	-1.02026	0.788105	-0.323472	-1.87877	-3.7533	-0.77474	0.498363	-2.13865	-2.15445	-1.38359	-3.09722	-1.13595	0.44328	0.856799	1.86627	-0.603528	-2.6556	-1.2681
cg03061677	-0.181346	-0.893842	-0.842111	1.97695	0.221709	-0.233179	-0.93496	-1.69279	-0.873877	-0.601707	-0.0880577	-2.09098	-0.157325	-0.732838	0.267882	-5.1378	-0.386933	-1.95917	-1.05231	-1.21555	-1.96366	-0.233101	0.0297175	0.66259	0.993799	-0.202621	-0.712108	-1.98241	-6.6827	0.0904589	-1.18336	-0.35164	0.714253	-0.242022	-1.40558	-3.6616	0.00191549	0.372848	-2.31408	-1.30348	-1.08171	-2.61267	-1.43939	0.389938	1.00601	1.30513	-0.173165	-2.17307	-1.16564
cg00576435	-0.182719	-0.206372	-1.09315	2.05532	-0.641848	0.167602	0.404135	-1.72715	-0.359197	-1.38444	0.173946	-1.50566	-0.304616	-0.659515	-0.168703	-4.55405	-0.417132	-1.71206	-1.44332	-1.23381	-1.5539	-0.168941	0.347173	0.193157	0.962693	-0.475125	-1.49287	-1.18761	-3.78968	1.15309	-0.650642	-0.153068	0.757277	-1.11585	-1.26324	-3.52273	-0.262741	0.456207	-1.74239	-2.21205	-0.982756	-2.17712	-1.30816	0.966008	1.45109	3.31948	-0.627631	-2.11459	-1.24026
cg18433380	0.826894	-0.163172	-0.632761	2.37621	-0.688453	-0.545877	-0.193784	-1.74932	-0.357755	-0.92586	0.243873	-2.14633	-0.306499	-0.811087	0.135162	-4.04723	-0.124126	-2.08009	-1.79785	-1.03384	-1.1138	-0.765632	0.254	0.869418	1.12226	0.0690721	-0.884558	-1.41016	-6.1268	0.682057	-0.74451	-0.190661	0.693183	-0.625322	-1.08487	-3.35909	-0.966803	0.542288	-2.26882	-1.7713	-1.16422	-1.94546	-1.17379	0.929394	-1.37284	2.18425	-0.54693	-1.85381	-1.0748
cg16648571	0.146742	-0.350063	-0.563941	1.66057	-2.44336	-0.138807	-0.762579	-0.35671	-0.402273	-0.488626	-0.102464	-0.673516	-0.219565	-0.3458	0.0967348	-3.50671	-1.59946	-1.36372	-0.874669	-1.02425	-0.621256	0.304588	0.179624	0.526895	1.65468	-0.368336	-0.106688	-1.41551	-4.77147	-0.289248	0.769093	0.24264	0.771646	-0.761563	-0.845322	-2.70314	-0.0306895	1.15474	-1.9446	-0.609318	-0.232962	-2.61178	-0.853773	0.0925367	-1.47903	-0.478133	-1.24693	-0.729596	-1.47922
cg04810287	-1.3367	-0.220873	-1.44639	0.0940431	-3.39734	0.482075	-2.67896	-1.26464	-0.62847	-0.880017	-0.714719	-0.261895	-0.623392	-0.534242	1.29498	-5.62497	-1.86403	-2.1352	-1.04939	-2.17484	-1.11708	0.736144	0.474398	0.635859	0.974562	-1.55021	-0.60183	-1.11261	-6.3772	-0.304846	0.689016	-0.836168	0.837133	-1.6813	-2.07304	-3.98273	1.21213	0.340573	-1.95706	1.96979	-0.0727178	-2.04358	-1.69261	0.4979	-0.718722	-0.756599	-0.647411	-2.20933	-2.399
cg25962605	-0.230539	-1.01544	-0.856536	0.11447	-2.76613	-1.94132	-1.0693	-1.9077	0.00100223	-0.271146	0.0753178	-0.0700487	0.267123	-0.164125	0.914645	-5.77251	-1.01868	-2.18189	-1.81317	-1.15373	-0.483626	1.37415	0.155037	1.16314	0.613413	-0.0198135	-1.82532	-1.2295	-3.8283	-0.187571	0.194767	-0.936205	0.207691	-1.52081	-1.62327	-4.44263	-1.31807	0.610666	-2.48216	0.563172	-0.24245	-4.00064	-0.597731	0.273169	-2.27214	-2.03541	-2.14926	-0.557082	-2.59584
cg21588305	0.438999	-0.726428	-0.940222	1.85932	-2.29343	0.0709378	-1.5965	-0.491883	-0.928559	-0.602777	0.116815	-0.381323	0.105667	0.188184	1.76273	-4.16209	-0.540036	-1.00227	-2.35814	-0.497717	-1.67327	1.88032	-0.402046	1.36832	1.40617	-0.530663	-0.303206	-1.22181	-5.76986	-0.708333	-0.233392	-0.466803	1.27239	-1.41241	-1.20611	-4.22095	0.314493	1.32821	-2.08571	1.74029	-0.596008	-3.89479	-0.652049	1.54988	-1.74009	0.720084	-1.23571	-0.597247	-1.21613
cg13708635	-0.342937	-0.353599	-0.540518	0.829649	-3.24367	-1.21289	-1.66307	-1.1917	-0.103306	0.17816	0.141318	-2.44279	-0.792161	-0.137547	-0.589811	-6.10332	-2.48022	-3.10539	-2.66934	-0.766322	-0.943776	0.207268	-0.906942	0.449669	0.143194	-1.77057	-1.66605	-1.10094	-3.26044	-1.93462	0.0710518	0.411363	0.545948	-1.21944	-0.200599	-3.60381	0.626743	0.0370079	-2.18955	-8.07997	-0.190229	-3.95496	-1.44323	-1.75241	-2.30081	1.11469	-2.73624	-2.19584	-1.75566
cg23566503	0.036441	-0.371482	0.297	0.0282679	-3.46767	-3.73362	-1.24451	-0.309841	-1.17654	0.952334	0.174224	-1.77965	-0.394267	0.227243	0.604919	-5.74374	-3.08132	-2.09361	-1.94123	-0.124385	-0.909212	0.830092	-0.390111	0.370703	-0.0127553	-2.05913	-1.69891	-0.722103	-2.35133	-0.856012	-0.376885	0.112128	0.216477	-0.021603	-0.0441909	-3.81311	-0.052021	0.186968	-1.82137	-6.06762	0.0423735	-2.28334	-0.24816	-2.13366	-1.64722	-1.297	-0.253074	-0.804833	-1.23308
cg10642330	-0.946989	-0.380617	1.0787	-0.0564615	-2.29027	-0.961724	-2.08745	-0.118346	-1.44033	0.3469	1.00594	-1.84996	-0.608153	-0.599926	0.0974811	-2.84298	-1.15752	-1.66323	-1.11632	0.439298	-0.00693964	0.245782	-1.68891	2.74761	-0.278374	-2.03751	0.293631	-0.347677	-1.75678	-1.88573	1.03691	-1.06207	0.300782	-0.447544	-0.793309	-2.90343	0.636143	-0.157605	-1.3582	-2.10433	0.839974	-2.04899	0.721218	-0.631957	0.101057	-2.26072	-1.40905	-1.92299	-0.221516
cg22457903	-1.48929	-0.948994	-0.413933	-0.482047	-3.05582	-0.812585	-0.65577	-4.85042	0.259404	-1.3806	-2.5236	-0.2576	-0.0856405	0.0609887	-0.522234	-3.837	-0.541757	-0.807708	-0.465857	1.31614	-0.365898	-1.31201	-0.633752	-2.2047	0.166571	1.43003	1.04937	-0.199548	-5.87396	-1.37668	-0.209435	-0.458669	0.436348	-0.224352	1.64167	-0.445594	-0.744512	0.548047	-2.82888	-1.91551	0.468415	-2.00989	0.131682	-2.19448	-2.34353	2.02895	0.0910499	0.329099	0.0845382
cg20091959	0.0393412	0.500998	-0.248233	-0.588677	-4.48959	-1.3795	-1.09871	-7.38214	0.643048	-0.0404334	-2.9868	0.0226683	-0.0561846	0.319804	-0.0626242	-6.94662	2.38544	-0.302319	-0.36676	0.666567	0.94339	-0.862306	-1.11759	-1.5405	1.92162	0.326422	-0.266609	-0.158421	-1.83404	0.0313921	1.39403	-0.144611	-1.32146	1.02382	0.294449	-0.132253	0.548308	1.99228	-3.2037	-6.31282	1.23727	-1.20142	-0.0861767	1.18445	-1.15279	-0.0639012	0.553612	0.54655	0.818557
cg17091610	-1.11705	-0.0500333	-0.710436	-1.07792	-4.27761	-0.638493	-1.60759	-5.50924	-1.26883	-1.43514	-3.37922	0.192416	-0.483577	0.0672318	-0.232872	-4.54941	-2.96621	-1.28234	-1.8358	0.808013	-0.543364	-0.0660588	-0.650861	-1.86563	-0.360683	0.450153	-0.426743	-0.0466168	1.60881	-2.36942	0.300242	-0.595931	-0.328351	0.92531	-0.00419053	-0.971755	-2.16127	0.0640962	-3.52883	-2.33479	-0.200501	-4.32623	0.0172062	-2.25498	-3.77097	-0.0975982	-1.30158	-0.051939	-0.364829
cg23626798	-0.452917	-0.904237	-0.944447	1.05914	-7.26226	-1.03485	-2.19078	-9.49317	0.0798084	-2.56558	-4.76808	0.190108	-0.703764	-0.0918787	0.788252	-8.99542	3.02308	-0.207444	0.619075	-1.24913	0.332019	-0.725321	-0.730015	-1.37938	-2.23561	0.417523	0.278933	0.477721	2.37563	2.50906	-0.835059	-1.66189	-1.45156	0.120672	-0.237281	-0.74802	-0.456279	0.59665	-4.99995	-6.31485	1.86661	-2.44482	0.148287	2.27382	-2.94816	-2.35784	0.545917	0.913941	0.238126
cg15388309	-0.521616	-0.493416	-1.072	0.789721	-5.78465	-3.12551	-1.82904	-9.52274	0.648176	-1.8328	-5.67163	0.57095	-0.807117	-0.46684	0.285453	-9.74966	1.89683	-1.68486	-1.80477	0.966327	-0.232394	-0.83729	-0.434836	-2.55542	0.194145	0.304284	1.08866	0.310883	-2.51473	0.827589	0.926412	0.721308	-2.29493	-0.101754	0.764185	0.44983	-0.834813	0.480898	-3.32997	-6.69315	1.23499	-1.29446	-0.889064	-2.96874	-3.50535	-2.55564	0.621541	1.41615	1.54098
cg16862791	-0.267434	-0.0915356	-1.651	-0.0289507	-6.79124	-1.76767	-1.39686	-8.2138	-0.313258	-0.70408	-2.58064	-0.0639026	0.561061	0.642764	-0.207421	-11.8051	0.44507	-0.787333	-1.30741	-0.244264	0.15211	-0.552989	-1.63833	-2.19482	1.84329	-1.24023	0.0709648	0.192843	-5.87797	-0.599294	-0.817862	0.179052	-2.82211	-0.625687	-0.368426	0.0833727	-1.46086	0.669158	-2.53876	-5.52354	1.00473	0.133101	0.372454	-4.29052	-1.77467	-2.34278	0.0912216	0.460993	0.879969
cg06446163	-1.13452	1.10104	-0.967709	-0.93948	-4.22653	-2.82364	-2.11168	-7.81899	-0.614257	-1.09761	-3.92038	-0.0190642	0.401021	-0.32931	0.204936	-9.02273	-1.6449	-1.76907	-2.39442	0.88542	-0.659351	0.120055	-1.50686	-3.30993	0.332384	-0.292245	0.588323	0.0613236	-3.77189	-1.31567	0.839856	0.126404	-1.14498	0.527164	0.344677	-1.07217	-2.26205	0.823113	-3.29599	-5.56236	0.62574	-2.8549	0.503276	-1.64709	-3.02707	-2.08718	-0.093348	-0.120358	0.135389
cg04984575	-0.167696	0.894204	-0.316188	-1.48607	-4.02308	-2.28098	0.492928	-8.33837	-0.281787	-0.723022	-4.15746	-1.1015	-0.57517	0.683344	1.22182	-11.4756	0.505251	-2.07733	-1.80291	0.520738	0.0870607	-0.949476	-1.47945	-3.12299	-0.00936767	-0.36589	1.72784	0.615298	-3.34314	0.857363	1.18883	0.92896	-0.876717	0.503811	0.191973	-0.260953	-1.85718	-0.248359	-3.43226	-4.87137	0.836283	-1.28698	-0.8932	-2.44931	-2.20284	-2.86563	0.0293985	-0.489385	0.0332272
cg02177317	0.13466	0.0582907	0.320304	0.284038	-3.87193	-2.18286	-0.541695	-10.9813	-0.0858513	-1.35629	-6.02911	-1.11242	-1.1295	2.34169	-0.0673204	-10.3185	-1.35711	-2.12961	-1.64103	1.42907	0.312448	-1.95097	-0.362646	-1.1583	-0.509913	-0.044536	-0.135852	-1.0468	-1.68953	0.580968	1.15437	-0.181325	-0.298886	-0.426397	0.585246	-0.598	-3.32728	-0.503765	-3.86723	-3.41317	-0.131673	-3.32724	0.718402	-1.63372	-3.75741	0.00272412	-0.570006	-1.24323	-0.521252
cg20529070	1.67431	-1.18249	-1.0501	-0.508801	-4.14676	-3.30755	-2.33114	-8.40181	-1.36298	-1.31469	-5.95027	-0.130207	0.551762	0.800842	-0.321751	-8.21687	2.02834	-1.06065	-0.426635	1.3554	-0.557474	-0.925699	-2.12358	-2.3712	1.68007	-0.45067	-0.970576	-0.550227	-8.70714	0.18903	0.867473	0.356217	-0.31848	0.0309802	-0.0087951	-1.22394	0.124437	1.96763	-4.5455	-3.58461	0.820407	-0.943252	-0.447448	-0.212997	-1.01673	0.130137	0.522177	-0.217986	0.127388
cg10360552	1.2576	-1.02984	0.375914	0.996121	-5.24073	-1.99204	-2.21222	-8.93423	-0.405311	-1.4838	-6.40068	-0.397297	-0.575648	0.602214	0.193026	-9.37558	0.33074	-1.833	-0.378215	0.843728	-1.27877	0.220337	-0.453674	-3.32776	1.64291	-0.880806	-0.248741	-0.577584	-9.87012	2.20398	0.748611	-0.0193788	-1.33242	-0.514562	-0.180422	-1.06974	-0.99194	0.815677	-3.974	-4.11767	0.170954	-1.10175	0.847287	-2.32457	-1.6248	-1.8218	1.05365	0.194002	1.16355
cg18911945	1.24991	-0.746643	-0.162065	0.680659	-4.79253	-1.92115	-3.02206	-7.27817	-0.389444	-1.23944	-4.98457	-0.66954	0.811362	-0.279593	-0.38718	-7.99767	0.92362	-1.7418	0.126616	0.845967	-0.989118	-1.19462	-0.652391	-2.19328	0.600202	-1.24947	0.132657	-0.718945	-7.22084	2.36242	0.390634	-0.373376	-2.02252	0.253686	0.381436	-0.0477845	-1.41794	1.40687	-3.04136	-4.28384	0.663237	-1.57784	-0.679817	-0.744023	0.792164	-0.123316	1.65897	0.355185	0.412054
cg01877937	1.01247	-0.822406	-0.589412	0.700525	-2.83909	-2.6798	-2.38981	-4.63729	-0.580083	-1.45883	-4.04202	-0.10338	0.0272695	0.0840331	-0.71948	-5.266	1.62339	-1.90904	-0.620936	-0.0507599	-0.902652	-0.647156	-0.544469	-2.15533	1.74234	-1.52154	-0.913794	-1.38905	-3.18059	1.69522	0.607914	-0.055272	-1.95296	0.241715	0.296317	0.11902	-0.430006	0.0407312	-2.47483	-3.32423	-0.593527	-1.3432	0.0169486	-0.0386034	-1.53452	-1.78468	0.412983	-0.243397	0.849124
cg08633313	0.749693	-0.168446	-0.672752	0.749125	-3.35604	-2.15865	-0.853472	-4.97879	0.343015	-1.08738	-2.7507	0.308223	-0.609455	0.535496	-0.574225	-4.9084	2.17853	-1.81299	-0.156592	0.511573	-1.72734	-0.628562	-0.212005	-1.72518	1.27659	-0.385544	0.601151	1.06434	-0.207624	1.3577	0.888022	-0.370104	-0.185019	-0.808191	0.667578	-0.30323	0.334926	0.645392	-2.33151	-2.81993	-0.0137263	-0.505907	-0.0971418	0.519576	-1.21927	0.105681	-0.317045	-0.260418	1.0259
cg12699433	1.54225	-0.41067	-1.38432	-0.887221	-3.09357	-1.43415	-1.52476	-5.5558	0.0376137	-1.77447	-3.61501	-0.0693199	-0.576092	0.134411	-0.648262	-6.07807	-2.14831	-2.62298	-1.79568	0.902831	-1.45042	0.0360864	-1.74884	-2.56363	-0.60072	0.0661679	-0.276232	-1.36422	2.84322	-0.594787	-0.0438095	0.437086	-0.260895	-0.625045	-0.268321	-1.25408	-0.336439	0.319919	-3.58762	-1.93779	0.166637	1.39333	-0.538926	-0.187126	-2.44141	-1.74171	-1.36012	0.459261	1.73087
cg11319028	-0.398726	0.967376	-0.380429	0.681376	-3.17279	-3.74927	-1.32363	-5.33665	-0.360518	-0.732104	-3.97496	-0.241779	1.30252	0.219265	0.290682	-4.81836	0.524403	-1.90899	1.30044	0.911516	0.279376	-0.286828	-2.08037	-2.46175	0.90948	1.15214	-0.745976	0.301425	-2.21327	2.1868	-0.198331	0.803615	-1.16213	-2.76248	1.47411	-0.66478	-0.756438	-1.06215	-4.40282	-1.47685	0.483551	-0.362744	0.199623	-0.453789	-2.21474	-3.46624	-1.12522	-0.914708	1.64369
cg22330467	0.407269	-1.27866	-1.50956	0.799909	-2.53699	-1.89051	-1.72198	-4.41694	-0.137889	-2.84327	-2.72626	-1.5701	-0.291114	-0.715795	-0.349273	-4.27411	-0.93512	-1.53148	-1.39144	-0.316638	-0.0120106	0.203528	0.0940612	-1.45157	-1.14277	0.0765876	-0.247095	0.829475	-3.07096	-1.65928	-1.11513	-0.00662083	-0.527741	-0.532306	-0.108687	-0.291074	-1.50864	-1.89057	-3.2865	-2.6412	0.0789526	-1.70844	-1.33406	-1.27093	0.553746	-1.3746	0.127457	-0.206702	0.850526
cg01071811	-0.530972	0.111107	-1.42567	0.628669	-2.92517	-1.36279	-0.183661	-5.93346	-0.353758	-1.50558	-3.27102	-0.50907	0.175966	0.144116	-0.740404	-6.01884	-2.36481	-3.30228	0.146469	-0.491926	-1.09787	-0.233611	-0.596857	-1.7921	0.860357	-0.0826965	0.86982	-0.218292	-0.544074	0.53983	1.97625	0.229421	0.255974	-0.359395	-1.46406	-1.03878	-0.73782	-0.180562	-4.07465	-2.32431	-0.011278	-1.66437	0.132389	-1.87974	-2.27579	-2.6054	-1.89557	-0.511937	1.2248
cg02611863	0.141472	0.00974028	-0.766411	0.174977	-3.36255	-1.81392	0.168543	-5.30645	-1.02283	-1.44937	-3.19901	-1.3633	-2.78469	-0.154301	0.318154	-5.79231	-2.77416	-1.50094	0.806771	0.285968	-1.0444	-0.737745	-0.910698	-1.43115	-0.412443	0.152434	0.454446	-0.342255	-1.70836	2.62182	1.45531	-0.953797	0.0803893	-0.656892	-1.66471	-0.453766	-0.137688	-0.21448	-3.37646	-2.92541	0.559186	-1.17855	-0.535967	-1.48439	-3.88762	-0.853503	-0.354586	-0.78109	0.671762
cg15330298	-0.44116	0.0297083	-2.18121	-0.207786	-4.58686	-0.885873	-0.296703	-7.58927	-0.280626	-1.72322	-4.13588	0.624364	0.749142	0.153527	0.077412	-7.77625	-4.12309	-1.15256	0.584313	0.750923	-0.934976	-0.241693	-1.4963	-1.27982	0.475424	-0.0595655	0.602562	-0.314617	-0.139014	2.52524	1.96831	-1.03593	-0.258615	0.528749	0.742052	-0.623741	-1.14137	-0.324015	-4.59527	-3.41859	-1.81714	-0.324854	1.168	-0.225638	-2.96425	1.21998	-1.12176	-0.90779	1.03645
cg20252111	0.421185	-1.27602	0.179522	-0.802918	-1.97883	-3.22023	-0.589442	-6.83255	-0.0354526	0.488683	-3.95608	-0.33695	-0.728828	-0.536164	0.521586	-6.50958	-0.718422	0.462947	-0.0493897	0.073506	-0.22032	-0.421743	-1.70586	-1.56192	0.151802	-0.177165	-0.160281	-1.59028	-5.67474	0.0869836	1.30025	0.118371	1.06357	1.03561	-1.09888	0.549813	0.0414129	1.68678	-0.581966	-4.20015	0.425407	-0.360181	-0.51212	-0.460118	-1.60266	-1.73741	-0.555259	0.0632065	0.757089
cg15302378	-0.539447	0.566454	-0.289284	0.198663	-3.51967	-3.07907	-0.314963	-7.22065	-0.348794	-1.58554	-3.38832	-0.620543	0.119031	-1.11175	0.573421	-7.44793	-2.49708	-8.45621e-05	-0.229283	0.359718	-1.21248	-0.351938	-2.51684	-2.56298	1.05311	-0.669668	1.11503	-1.1509	-5.11571	0.576531	1.86928	-0.208969	-0.910598	0.170874	0.0524165	-1.67681	-0.352301	-0.629145	-4.16122	0.230424	-0.259331	-0.932159	-0.0377789	-1.08733	-2.17409	2.19688	-1.76272	0.17453	0.987829
cg09541000	-4.29643	0.548675	-0.279759	-1.89496	-4.11069	-3.17305	-2.67295	-7.4489	-1.65934	0.00972972	-4.00521	-1.62382	0.706633	-0.696921	-3.44753	-6.84172	-1.77127	-1.8275	-0.988512	1.00842	-1.16337	1.33015	-2.05882	-2.64467	0.00830968	-0.245145	-0.915017	-0.826452	-7.88079	0.507512	-0.178267	-0.0372198	-0.326869	-0.442403	-0.50305	-0.427519	-0.588846	0.880113	-4.27403	1.45703	-0.71641	-1.06763	1.36849	-0.150592	-3.9986	3.00407	0.445138	-0.39128	-0.117267
cg02472486	-0.786618	0.415977	-0.201598	-0.2032	-5.30368	-2.05438	-2.30109	-8.602	-0.957986	-0.0230639	-4.13302	-1.21065	1.11023	-0.374308	-1.22157	-7.24117	-2.10452	-1.49141	0.0121998	-0.364052	-0.257126	1.29301	-1.24813	-3.66519	1.37075	-1.22179	0.945194	-0.395739	-9.31925	-1.54611	0.440632	0.253084	-1.36885	-0.390786	-0.953246	-0.150406	-1.35998	-0.332872	-4.7221	0.213283	-1.73302	-1.51048	0.87918	-0.481619	-0.614334	2.51405	-0.688708	-0.578737	1.73272
cg04132853	-1.50582	2.8952	-0.911338	-3.31416	4.12013	4.43928	1.71046	6.40665	-0.600721	1.12733	-0.0263768	-1.19673	1.08695	0.578959	1.10846	-0.973843	-1.50822	-2.57133	-0.122298	0.490304	1.01597	0.32272	-1.97922	1.64845	-0.420988	-2.98317	1.47073	0.0220466	0.539588	0.913709	-1.04384	-1.81026	0.793049	0.305377	1.26622	-1.79057	0.131075	0.0762756	-0.194939	2.29671	-0.675223	-2.05212	-1.23522	0.957771	-0.45692	1.21492	1.28025	0.218522	1.02218
cg25090051	1.03975	1.35442	0.700545	-1.27471	4.90369	4.28718	-0.107718	6.02445	-0.258666	-1.36719	-0.505443	-2.62812	0.174094	-0.133624	2.10578	-1.12058	-1.69191	-2.73777	-0.14328	0.514826	0.231118	0.151559	-1.10197	1.02447	-0.431178	-2.43362	0.109955	0.292761	0.484552	-0.594627	-1.55884	-2.18297	1.25954	1.26591	1.25412	-1.07577	0.589752	0.470918	0.357838	-1.17616	0.621809	-1.78196	-0.858177	1.78217	-1.94371	0.517012	0.1433	-1.87264	0.301102
cg00732970	-2.40305	1.11535	0.821386	-1.53109	4.883	-0.135575	-0.740446	8.25596	-0.858178	-0.964706	1.1406	-0.414051	0.832116	0.156052	0.783406	-0.877669	-0.674861	-1.29228	0.106474	-0.470826	-0.584492	-1.80195	-0.0897089	0.371411	0.528766	-0.238793	-0.857894	-0.183014	-3.44574	1.43076	-0.5711	-0.85197	1.45835	1.01962	0.305695	-0.273318	1.02748	0.473618	0.935506	1.32578	1.06018	2.90273	0.0789808	-0.649969	-0.389814	0.969706	-2.20003	0.0159783	1.39533
cg20019489	-1.9542	1.24623	-0.769985	-3.22213	3.35656	2.68794	0.436306	3.60886	0.984331	-0.74832	1.13774	-2.65342	2.9376	-1.70238	0.7915	-2.78464	1.37682	-3.57492	-1.40345	-0.470944	1.74611	0.32863	-1.38616	0.426875	0.490473	-1.2523	0.534299	0.755045	-1.01115	-1.89646	0.326986	-0.744596	1.64308	0.888248	-0.540629	-0.299716	0.117567	-1.42336	1.78978	-5.62914	0.158939	-2.49775	-0.940547	-0.142142	-1.78645	-1.99297	1.2456	-0.821602	-0.0985229
cg02274728	-1.07045	1.64317	-1.40808	-2.33428	6.89802	5.78261	0.275305	7.73357	-0.768332	-0.594155	0.292306	-3.31403	2.47846	0.488003	0.181232	-1.9674	-1.59013	-3.11369	-0.815015	0.123414	0.806437	-1.54419	-2.15275	1.09258	-0.93007	-2.24973	0.240061	-1.18169	3.0185	-0.343107	-0.894486	0.0351086	2.37284	1.13963	0.650566	-0.885507	2.95476	1.39076	-1.13789	-8.05455	-1.46948	-1.87381	0.0139687	1.89889	0.953784	1.54174	2.11284	-0.523809	-0.660114
cg12054318	-1.14275	0.31162	-0.867341	-2.36159	4.14821	-0.39024	-0.469644	8.56805	-0.181854	0.255668	-0.087627	-0.706595	0.159052	1.04274	0.704195	-1.2921	-0.0113137	-1.79298	-0.478125	0.488773	-0.123377	-1.12985	0.0172398	0.842417	0.107391	-0.763351	0.322531	-0.360351	5.51646	-0.0216718	1.79446	-1.12858	2.42447	1.50758	-0.45286	-1.82575	-0.104561	1.44542	-0.0802302	3.33381	-0.555244	0.428971	0.386939	0.427651	-0.215884	-0.114046	0.503713	0.0431991	-0.262986
cg25268451	-3.65922	0.902634	-2.10261	-1.24669	5.40466	-0.651456	-1.27251	8.31483	-1.41206	-0.725537	-0.0743956	0.314778	-1.05978	0.586313	0.387178	-1.43125	0.670511	-1.55323	-0.139978	-0.0205528	-0.356551	-0.951369	0.371698	0.898603	-1.2904	-1.57323	-0.753621	-0.686459	3.7868	-0.533052	1.2172	-1.04245	2.75551	1.2556	-0.921251	-1.33519	-0.0926695	1.44496	0.528398	3.38938	0.581106	-0.687094	-0.741141	0.460578	1.61177	-0.487598	-0.628777	-0.377528	-0.47168
cg11996914	-1.7893	-0.776036	-0.50036	-1.95214	4.55249	2.07059	-1.12753	10.4945	-2.01836	-0.228288	-0.629861	-2.05414	-0.474977	1.38817	-0.846646	-1.21407	-5.08347	-2.24542	-2.16429	0.326821	-1.19195	-1.17611	-1.04616	0.291697	-0.165116	-1.09158	-2.13615	-0.598777	4.50208	-3.48456	0.709424	-0.0163694	2.34451	-0.25866	-0.763694	0.208296	-3.07778	0.485177	0.830144	-1.81105	-0.748386	-3.54233	0.87627	-1.4302	-3.81383	-1.05919	-1.02654	-0.588689	-2.04614
cg21330323	-1.1443	-0.709885	-0.708633	-1.18875	3.33248	1.31256	0.0906071	8.13736	-0.685852	0.801933	-0.532045	-0.823973	-0.472396	0.190321	-0.465649	-0.958057	-1.96424	-1.69986	-1.31366	0.999581	-0.367456	-0.918124	-0.199598	0.356274	0.133801	-0.339021	-0.721306	-0.067569	3.37072	-1.80266	-0.0944591	0.310175	1.26067	-1.10345	-0.135453	-0.639837	-1.95223	-0.281334	-0.116034	-0.91144	-0.722649	-1.93508	0.448468	-0.726506	-2.46259	-1.07114	-0.0502249	0.286836	-1.0594
cg06163629	0.278728	0.202916	0.473256	-0.18344	3.52446	1.34575	-1.04231	7.3943	-0.182922	0.650879	-0.231964	0.0487168	-0.100612	-0.09169	-0.120557	-0.44532	-1.80444	-1.52885	0.0860689	0.8467	0.0757701	-0.717693	-0.983349	0.710341	0.364822	0.159164	-1.29997	-1.26272	4.25656	-0.969935	-1.31474	-0.290396	1.57034	-0.365809	0.14912	-0.379748	-1.88764	1.40439	0.0355134	0.380959	0.0285852	-1.29361	0.890455	-0.159708	-1.62733	0.836039	0.778491	0.336055	0.0974091
cg14597908	-1.08923	-0.166917	-1.01867	-2.44664	3.73861	0.743612	-1.56182	8.00605	-0.196974	-0.254126	-0.643649	0.103507	-0.465152	0.0664666	0.704236	0.0478035	-3.92753	-1.28482	-1.70017	0.456653	-0.250202	-1.20765	0.553312	1.09631	0.768642	0.0194114	-0.650189	0.706875	-3.17334	-0.597569	1.09898	0.401022	0.834879	-0.19521	-0.194136	-0.781953	-1.74311	0.276641	1.02507	1.38914	0.197866	-2.53297	0.632762	-2.70167	-0.583518	-2.67583	-0.172316	0.214686	-0.112337
cg00765653	-0.855154	-0.0206543	-1.1421	0.720259	4.37737	1.39099	-0.197351	10.0321	-0.164895	-0.235624	-0.22175	-0.811335	-0.391191	-0.570611	0.738559	0.303061	-2.54067	-1.39751	-0.969904	-0.72283	-0.645446	-2.37415	-0.502373	1.24141	-0.942499	-0.738185	-2.06481	-0.787967	-8.78731	-1.16044	0.898302	-0.244841	0.695588	0.112397	0.459283	0.772485	-0.0130987	1.80771	0.033156	-0.389221	1.36385	-0.0308953	0.840493	-0.91662	-3.22476	0.65599	0.76335	1.08455	-0.224951
cg14728235	-0.542262	0.394428	0.503608	0.454606	4.46972	0.344772	-0.302357	10.8858	0.476943	-0.476445	0.430923	-0.0140946	1.52171	0.951239	1.08369	0.880869	-1.29666	-1.97322	-0.595198	1.12526	-0.590227	-1.24401	-1.05986	1.7639	1.38669	-0.130555	-0.34126	-0.270319	-12.6383	-1.14466	1.40708	-0.879561	0.865293	-1.60291	0.721936	-1.81414	-0.373737	1.25667	0.656651	-0.302792	-0.360485	-1.71383	0.556653	-0.906451	-4.32399	0.509567	1.64326	0.506557	-0.289717
cg05558390	-1.22756	1.03695	0.810183	-1.25245	2.47487	2.95796	-1.43618	12.8868	0.331936	0.834308	-0.525656	-0.431737	1.64274	0.627039	0.172163	0.596828	-0.910567	-1.31314	1.0783	1.60712	0.787488	-0.732429	0.755058	1.58631	1.35572	-0.338023	-0.0446674	1.06628	-1.26821	1.72879	1.61647	-0.534356	1.30394	0.946969	-0.88866	-1.45634	-2.38834	0.0600063	0.709591	0.45099	0.142177	-1.4394	0.232255	-1.55323	-1.12612	-3.35323	1.22477	0.534706	-0.267144
cg19296354	-1.81773	0.39583	0.292907	-0.429174	2.48343	1.38907	-0.958672	6.88729	-0.759623	-0.337854	-0.493712	-1.34043	-0.486986	-0.0765702	0.295686	0.673643	-2.01228	-1.29824	-0.176984	0.476261	-0.868047	-1.75151	-0.754345	0.94063	-0.293505	-0.584861	-1.24306	-1.2922	0.0993629	0.197281	0.0517988	-1.07808	1.23804	-0.031656	-0.387593	-0.968987	-1.8698	1.7233	0.551442	0.000691079	1.05113	-0.944745	0.953053	0.0995023	-2.64151	0.833891	-0.00645059	-0.798135	-0.889188
cg24975842	0.516906	0.227557	0.670995	-0.51653	3.48323	0.678209	-0.867278	7.30948	-0.482725	0.121882	-0.26517	0.199289	-0.616197	0.157658	0.116851	0.534113	-2.89831	0.0261804	-0.654878	0.831401	-0.614846	-1.84945	-0.803627	1.43893	0.328892	-0.46294	-1.79059	0.059825	-3.92817	-0.929793	1.71138	0.167378	0.482322	0.293175	1.29098	-0.392513	-1.18705	1.54316	0.998584	-4.21998	1.23125	-0.0393093	0.680382	-4.02303	-0.64789	-2.14336	0.455887	-0.270455	-0.705938
cg18619398	-0.415899	-0.0951462	-0.00523857	-0.567926	1.95945	0.239695	-1.11032	4.17134	-0.383008	-0.956491	-0.482262	-0.276776	-0.0664486	-1.16025	0.470649	0.0959923	-1.61972	-0.862509	-1.45765	0.0274264	-0.243334	-1.11433	-0.82925	-0.00559946	-0.596486	-0.354374	-1.05098	-0.524333	-1.54605	-0.948662	0.38005	-0.619308	1.2059	-0.146897	0.0955769	-0.736703	-1.13224	1.41228	6.87073	-3.17111	0.206087	0.594802	1.30031	-2.37099	-0.328724	0.264313	0.089666	-0.361791	-0.122632
cg01355739	-0.785821	-0.222178	-0.683444	-0.779616	3.65713	0.53426	-1.35797	6.25126	-1.6018	-0.606299	-0.574847	-0.0165131	-0.667188	-0.671219	-0.0426478	-0.22641	-2.11827	-0.288502	-1.40556	0.0934793	-1.21583	-1.10883	-0.909731	0.181626	-0.0690816	-0.557431	-1.32247	-0.870141	0.103517	0.134118	0.0718694	0.729134	0.707077	-1.65098	-0.458836	-2.28088	-2.03682	1.76953	-0.00320124	1.98006	-0.918209	-2.17624	1.15851	-2.35661	-3.62291	-1.44427	-0.309944	-2.2705	-1.28894
cg00952145	-0.733706	0.326951	0.352838	-1.75328	2.12717	1.58269	-1.74788	8.8302	-0.0559669	-0.199628	-0.324782	-0.0779193	0.223898	-0.647807	0.368004	0.8626	-2.74436	-2.17528	-0.727071	0.0825076	-0.810894	-1.24737	-1.06285	0.721714	0.109164	0.63518	-1.5435	-0.261469	-2.71494	-1.46324	0.496243	-0.170474	0.403976	0.385519	0.246328	-1.04773	-1.81939	-0.184619	0.70598	-3.75962	-0.167027	-1.44873	0.585936	-1.5701	-1.06149	-0.673689	-0.415044	-0.338468	-0.266931
cg20582984	-0.859008	1.34263	-0.874895	-0.90632	3.83357	1.32465	-0.828478	5.49328	0.34626	0.456895	0.0732957	-0.372197	0.23558	-0.251898	1.37827	0.149784	-1.2303	-1.06434	-1.20001	-0.892107	-0.91306	-1.77467	0.562482	1.3705	0.969645	0.0887135	-0.609053	-0.520045	4.34714	0.634354	-0.207046	0.282203	0.918524	-0.303235	0.36681	0.319288	0.566529	0.208249	0.0327607	0.915097	1.00953	-2.45509	-0.134117	-0.430149	-4.44046	-2.67571	-1.11591	-0.56005	-1.71969
cg18949315	-1.85374	-0.089077	-0.231599	0.086664	4.47333	0.449895	0.927401	5.788	-0.803548	0.279794	-0.826741	-0.713384	0.848574	-0.157539	0.458532	-0.950819	-0.186539	-0.878486	0.248198	-0.0673295	0.123097	1.1625	0.204756	-0.410524	-0.626706	1.02009	-0.927511	-0.381067	-1.73141	1.49191	-1.07303	0.671361	0.259542	-0.117712	0.639844	0.032829	1.51556	0.539932	0.427066	-2.47284	-0.114317	2.41674	0.608632	1.21806	-3.65385	1.62205	-0.751805	-0.885103	-1.6745
cg18935491	-1.48515	-0.752383	0.195953	-0.821136	-3.41415	-5.9937	-0.99854	-10.6554	-1.19533	-0.632863	-0.394437	1.00438	-1.11061	0.165676	0.274484	-0.0616606	-0.949859	-1.69429	0.610349	-0.236744	-1.16033	-1.96559	-1.6634	0.867314	1.24942	-0.306548	1.2307	-0.893513	-11.6634	1.27754	1.72264	0.732731	1.89563	-1.30362	0.204308	-1.73074	-1.90642	0.208855	1.4828	-0.300716	0.196458	-0.513153	1.26233	0.0107829	1.46231	-0.278345	-2.62572	0.298915	-1.79068
cg24203465	-1.94223	-0.253202	0.316772	-0.596731	-1.89651	-4.9073	-1.54707	-7.03182	-0.261201	-0.920085	-0.249179	0.608628	-0.0339513	-1.46533	0.226998	0.342675	-1.4228	0.954338	-1.14962	-1.24943	-0.565887	-1.80794	0.425993	0.824868	1.46287	0.232784	0.417112	-1.15258	-7.50874	-0.0759098	1.53543	-0.379635	1.66313	-0.449351	2.31656	-0.728644	-1.77487	1.81706	2.09981	-0.154403	0.345132	-0.292019	0.993708	-0.568494	0.346186	0.378069	-2.75086	0.507741	-1.61593
cg26102503	-2.88143	0.390868	0.20866	-0.64395	-2.08404	-3.90464	-0.508632	-6.01712	-0.423481	-0.200343	0.00206638	0.805344	0.190097	-1.27249	0.42881	1.67052	-1.0021	3.15216	-0.594875	-0.646872	-0.0445486	-1.82619	0.00918185	1.05675	0.767655	0.357885	0.475698	-1.37282	-5.95172	0.726399	1.23555	-0.935138	2.13974	0.270615	3.42921	-0.526715	-1.95848	1.44801	2.61076	-0.364822	0.731871	-0.854618	0.622472	-0.402299	0.341015	0.0861247	-2.25465	1.33945	-0.997182
cg03344105	-0.736374	-0.780603	0.471384	-0.979172	-3.39642	-5.7648	-1.12714	-5.99509	-0.751095	-0.733565	-0.999116	-0.799635	0.770012	-0.0378692	-0.66847	0.421367	1.20202	-1.89409	-1.06875	-0.0779278	-0.343595	-0.832189	-1.18585	0.780616	-0.0218363	-0.134857	-0.523566	-0.147892	5.96299	0.751699	0.294615	-0.0644759	0.685136	-0.893114	0.19942	-1.62333	-3.08405	1.01737	-0.482797	1.8865	0.317835	-0.533783	1.64994	-3.02643	-1.07184	1.95048	-0.66965	-0.0276862	-0.527551
cg14660776	-1.04181	-0.609794	0.160185	-1.41033	-2.87956	-6.64487	-0.978951	-4.87741	-0.519068	-0.419347	-0.395232	-0.288883	-0.0210642	-0.358555	-0.731621	0.211509	1.30061	-1.52591	-1.15501	0.266261	0.144309	-0.781583	-0.931748	0.488671	0.591103	0.13353	-0.22499	-0.473096	6.47664	1.39289	0.134482	0.657103	0.518355	-0.223752	-0.312441	-0.966888	-0.365438	1.41144	0.125506	1.72044	0.786158	-0.0490835	1.0464	-2.48626	-0.652717	2.36099	-0.494673	-0.202389	-0.0575525
cg19592829	-1.04222	-0.30629	-0.413604	-0.11374	-4.90201	-5.73896	-1.34905	-5.92843	0.802094	-0.622339	1.07735	0.969018	0.0345739	0.697795	0.0607099	0.570152	0.497639	-0.362088	-0.734983	0.519599	0.829063	-1.65869	0.0467	1.84325	1.08667	0.443183	0.369999	-0.223458	-6.88868	-0.355352	2.1719	-0.753533	0.366249	0.88462	1.25901	-0.585701	-0.27847	1.23029	0.678005	-2.00937	-0.270217	-0.707108	-0.440253	-1.27615	1.33596	0.742903	-0.497578	0.940826	-0.0251612
cg09123158	-2.8295	-1.07158	0.571785	-0.947579	-0.812689	-1.34893	-1.03333	-3.59335	-0.86049	0.316025	0.385979	-1.96708	-0.336823	0.592841	0.268993	-1.23328	0.0825596	-2.62891	-1.54037	1.43131	-0.692766	1.64242	-1.66048	1.10745	-0.683342	-0.44	-0.82444	1.08001	-4.02486	-0.258151	-0.554984	-0.682394	-1.0028	0.0137582	0.346199	-2.17151	-2.7685	0.923934	1.05714	-5.33432	2.17148	-1.33104	1.12426	-1.53863	-2.34569	1.06208	-1.55482	0.879466	-3.22831
cg11669839	-3.04574	-0.757001	-0.432665	-0.971243	-3.95099	-9.00077	0.114714	-9.20759	0.157167	-0.518135	0.669359	1.15934	-0.0269715	-1.05766	0.4653	1.46004	-1.71413	-0.494741	-1.37443	-0.472584	-0.635401	-2.70335	-0.267001	1.47066	0.477574	0.534598	-0.794197	-0.966042	-10.8748	-1.2411	1.06889	0.812109	0.766577	0.510294	0.35807	-0.85749	-2.92743	1.29398	-0.868565	-3.10518	-0.731832	-1.72545	0.3579	-2.49374	0.127319	0.304905	0.31001	0.742183	0.270734
cg17841572	-1.20458	-0.910825	-0.445602	-0.814383	-4.51605	-4.28045	-1.68914	-7.82849	-0.939427	-1.58497	-0.17179	-1.33225	1.03024	-0.0138865	-0.0333091	0.700783	1.08892	-1.91256	-0.118163	0.361758	0.193173	-0.727518	-0.861337	2.79698	1.48077	0.612699	-0.0301641	0.97144	-8.87999	-0.553633	0.512863	0.431261	0.598381	0.491574	0.228818	-1.8628	-1.07684	0.838992	-0.860594	-1.95767	2.71418	-0.405744	0.775123	0.91071	-0.87589	3.88011	-0.185361	-0.742364	-0.179095
cg25229306	-2.01673	0.512264	1.09368	-1.28902	-5.07297	-4.82515	-0.266303	-7.71923	-1.76069	-1.0942	-0.390925	-1.99648	0.755508	-0.177815	0.0323681	0.563021	1.29031	-1.88131	-1.53748	0.70786	-0.492902	-0.392841	-1.69446	2.44253	0.563035	0.345594	-0.945751	0.804369	-2.14855	-1.25454	1.79702	-0.0714176	1.07367	0.613143	0.170879	-2.85707	-0.353569	-0.480372	0.600254	-5.81683	2.80491	0.504324	1.32558	0.178286	2.06376	3.12226	-0.735577	-0.242492	-0.369934
cg14482474	-0.861992	-0.386006	0.13013	-1.24144	-3.94735	-4.12107	-1.63626	-6.98593	-1.61655	-1.22362	0.215845	-1.28065	1.83759	-0.195214	0.355703	0.00920368	0.351757	-1.59015	-3.09053	-0.156884	-0.480061	-1.41742	-0.935867	1.26821	0.600008	-0.12838	-0.847686	0.407533	-1.70086	-1.19287	1.13734	-0.368487	1.01766	0.757652	0.0932801	0.0290757	-1.36772	0.570482	0.253944	-3.06873	3.29978	-0.0487675	1.44964	-0.866072	1.86011	1.51365	-0.315705	-0.515306	-0.958293
cg11285807	-0.358226	0.106892	1.20803	-1.64689	-2.13139	-3.4652	-1.04738	-6.75872	-0.506874	-0.00473253	0.550395	-0.181822	1.91544	1.45679	0.00717527	-0.974399	-0.387037	-0.506542	-0.0384477	1.82318	1.12265	0.0696482	-1.53489	3.2581	0.664209	-0.236965	-0.374136	0.789191	-10.2447	0.488721	1.9848	0.186562	0.724163	0.9717	1.11717	-0.398736	1.00861	-0.493808	0.774504	1.2554	2.5817	-0.0900611	1.18001	0.111635	1.47237	0.781706	0.766921	0.0520983	-0.012103
cg06200857	-2.05061	0.116595	0.10737	0.236859	-2.02785	-3.84293	-0.0565727	-3.64229	0.218629	0.132712	2.07232	0.206238	-1.49944	-1.43305	-0.158267	1.98688	-0.12093	3.47293	3.45544	-1.86892	0.214377	-0.943214	0.721201	0.939305	0.291822	0.741644	0.270337	-0.71419	-6.27109	2.41195	0.919236	-0.411571	1.61731	0.51269	3.38777	-0.258291	-0.489109	1.07681	0.833215	1.06267	0.478433	-0.757606	-0.0553425	-1.85548	0.43552	1.25101	-0.673885	0.714977	0.35275
cg08091561	-2.37458	-0.223022	0.20179	-0.0741903	-1.61518	-2.03908	-0.0788519	-2.74734	0.477056	0.20194	2.19165	0.481761	-1.49388	-1.50122	0.398775	1.85857	-0.17879	3.39364	3.11185	-1.59675	-0.418149	-1.91387	0.251365	0.46065	-0.590745	0.736478	-0.113574	-1.6008	-4.62812	2.36099	0.565312	-1.04152	0.68088	0.60369	3.06925	0.150171	-0.51769	0.607837	2.09624	0.504625	-0.173736	-1.01189	-0.0594952	-1.20684	-0.624694	0.262218	-1.09286	0.236992	0.387294
cg22860367	-1.28979	-1.38923	-0.396703	-1.10791	-3.9822	-7.62986	-1.1708	-7.50632	0.56442	-0.132332	1.17648	-0.491761	0.476427	0.954607	0.456178	1.36172	-0.395235	-1.04174	-0.998972	0.0539551	-0.0666286	-1.71416	0.405019	2.47204	0.285714	0.457998	-0.889972	-0.0621725	1.52497	0.822745	2.83616	0.272306	0.151526	1.06342	0.543526	-0.290578	-0.459978	1.15852	-0.943827	-1.78411	-0.593949	-2.48198	0.633698	-1.78284	-3.0383	1.27176	-0.357851	-0.296724	-0.601185
cg07947033	-1.75927	0.2451	0.739764	0.014485	-1.39176	-3.78299	-0.434838	-4.29153	-0.0712771	0.12333	1.59964	0.182545	-1.08804	-1.89989	0.625657	1.22101	-0.456434	1.28894	1.4188	-1.33242	0.426247	-1.47222	-0.306735	0.421938	0.433561	0.407861	-0.0751841	-1.13064	1.71956	0.997698	0.89501	-2.11214	1.86218	0.703816	1.84346	0.300518	-0.0932833	0.727185	0.593958	-0.541631	0.457643	-0.167734	0.617553	0.0626491	0.0419146	0.814482	-1.97444	0.159701	0.464048
cg04677683	-1.22334	-0.55652	-0.41514	-2.11357	-3.18984	-5.02794	2.02743	-4.98289	-0.00609657	-0.970104	1.5201	-1.0925	-0.549449	-1.38965	-0.190381	0.897862	-2.43184	2.03284	3.45695	1.24588	1.76755	-1.64568	-0.321076	0.251372	0.312639	-0.919777	-0.612439	-0.973696	-2.90888	1.88217	2.36018	-1.49875	1.04492	0.0500558	2.76349	0.630461	1.05202	0.123296	0.934458	-0.72239	0.583963	-1.22381	0.10498	-0.414791	-0.940038	-1.80862	-1.30273	-1.06122	-0.0845886
cg15160445	-1.33907	-0.18044	-0.487022	-1.92832	-2.94902	-4.78008	1.58617	-5.75986	-0.056775	-0.906244	0.810947	-1.37552	-1.31068	-1.6333	0.207207	1.51983	-1.77743	1.25187	3.01933	1.5118	1.95546	-1.28009	-0.45883	0.130525	0.390411	-2.05202	-0.683068	-1.26281	-3.6563	1.32427	2.27778	-1.73362	1.77309	0.324269	2.07499	0.67033	1.11793	-0.0480108	0.721904	-0.0044927	1.12305	-1.27194	0.132154	-0.145695	-1.23485	-1.14365	-1.78156	-1.24777	-0.318671
cg25326570	-1.64552	-0.435322	-0.442884	-1.43843	-2.5221	-4.68131	1.29536	-4.78517	0.557096	-0.905191	1.16827	-1.48342	-0.635506	-1.16825	0.131396	1.2353	-0.926909	1.58804	1.81986	2.07591	2.54223	-1.48509	-0.0812577	-0.117815	0.106303	-1.19494	-1.25755	-1.55352	-1.46153	1.71041	2.75492	-1.33736	1.24331	-0.187453	2.18621	1.26609	2.20733	0.070961	0.272947	-2.07061	0.435026	-1.69698	0.181527	-0.676207	-0.796768	-0.636885	-1.81716	-0.779771	-0.357901
cg01715551	-0.654265	-0.846747	-0.177421	-1.30272	-4.75978	-8.02529	-1.18817	-8.80349	-0.618802	-0.667241	0.381875	-1.95084	-0.392969	-0.518666	-0.00839596	1.33768	-1.15333	-1.34625	-1.645	1.2153	-1.04507	0.0238571	-0.257087	-0.739202	-0.790037	1.15103	-1.49298	-0.59264	-0.0995323	-0.660494	1.47279	0.86211	0.78668	-1.13407	0.40083	0.457362	-3.56324	1.05566	-0.197553	-3.31058	0.0384708	-3.75727	0.160482	-1.5716	-2.92088	-3.48638	0.362802	0.0966483	0.518368
cg14176797	0.449376	-0.0398614	0.769609	-0.88409	-4.50537	-8.24195	1.21147	-8.46262	1.22866	0.174937	0.961189	-0.753013	0.877017	1.81378	0.30997	1.09457	0.528675	0.404157	-0.481182	1.69892	0.288114	-0.707994	0.0920494	1.98295	0.564188	0.61081	0.319894	0.714158	-0.26142	0.742034	1.14269	1.28979	-0.280532	0.0132095	1.12824	0.759218	-2.79202	1.07513	-0.652439	-1.25757	0.786963	-3.73359	1.41852	0.249661	-1.68534	0.390621	1.84739	0.879609	0.105525
cg04457481	0.023452	-0.167287	0.11223	-1.02323	-3.08656	-6.52422	0.0771228	-5.30479	0.126158	-0.0506548	0.475086	-0.431815	0.579894	0.412164	0.691417	1.10743	-0.390973	-0.866217	-1.5633	0.0570502	-0.804989	-0.863378	0.814886	0.564954	1.11199	1.28368	-0.175556	0.158578	0.990153	-0.256378	1.09785	1.46635	0.259295	0.601324	0.424583	1.33122	-1.99606	1.1816	-1.1995	1.09169	0.638549	-2.3778	0.805347	0.0733123	-0.232563	0.518463	0.86351	0.795725	0.212048
cg21938532	-0.402752	-0.944794	0.424996	0.780325	-4.38813	-8.38952	-1.4295	-7.05603	-0.446871	-0.211542	-0.0291384	-0.0916795	-0.0222083	-0.217764	-0.0736125	-0.292847	-2.15784	0.542198	0.078466	-0.83425	0.243843	-0.679814	-0.652311	1.34781	-0.0272116	-0.591448	-1.83672	-0.862991	-1.70646	-0.373338	0.852135	0.530473	1.43214	0.403175	-0.56618	-0.414729	-1.921	0.314131	-2.57834	-1.5065	0.473502	-2.57518	1.23379	-1.13823	-2.26015	0.0639436	-1.75341	0.0227657	-1.22483
cg22989942	-1.40742	-0.946264	1.13445	-2.10785	-6.91182	-21.4061	0.112071	-18.4857	-0.98274	1.1595	-0.223284	-2.04325	-0.0057749	2.47233	0.139204	0.492101	-0.170831	1.03328	-0.391519	2.62761	-0.111319	-1.40071	-1.29217	3.45923	1.91963	0.378546	-0.133118	0.306879	-3.6998	-0.33409	2.45607	1.79903	0.00058194	0.316663	2.00598	-0.0339904	-4.30952	-2.12568	-4.02867	-2.3442	1.36581	-5.4374	0.384281	-1.42645	-2.05978	-1.96392	-0.673822	0.374172	0.182623
cg18224653	-0.121573	-0.00559368	0.811751	-1.87443	-4.95103	-6.09546	-0.9272	-7.68104	-1.02298	0.088397	-2.37004	-3.89675	1.65876	0.782478	0.85309	-0.250496	-0.992102	-0.294496	-0.67655	1.48862	0.391519	-0.463331	0.416044	0.82061	1.96405	0.522912	1.15485	-0.27905	-4.40503	0.557208	2.93827	1.29605	0.0258554	0.585933	1.68879	-1.76821	-1.74886	-1.16615	-2.08347	-1.04053	1.2879	-3.50904	0.615263	-2.42368	-2.43868	-1.27008	-0.910858	-0.0167561	0.541832
cg05309239	1.45889	0.93895	1.53739	0.693084	-6.60284	-14.4478	0.942978	-12.9235	-0.435324	1.11276	-0.621025	-0.0412818	1.33543	1.60783	0.415317	-1.17196	-0.168966	1.70096	-0.204923	1.60214	1.02648	0.514754	0.209039	1.98624	0.547966	-0.438092	-0.760796	-0.0747926	0.12468	1.926	0.837948	-0.430205	-1.8507	-0.096207	0.0489913	-0.0679911	1.17388	-0.65332	-3.41215	0.173155	0.569919	-1.85439	0.820747	-1.06527	-1.71723	2.2348	-1.73409	0.443268	0.0370404
cg12573482	1.01347	-0.0942496	0.555729	0.09142	-4.65771	-7.97376	-0.79348	-7.53689	-0.0536026	-0.205413	0.0961275	-0.491525	0.438237	0.76038	-0.437551	0.76831	-0.270788	0.949126	0.504233	0.512998	1.6978	-0.365045	-0.846694	2.24395	0.488923	0.944015	-0.0515621	-0.212762	2.08546	1.33901	0.838088	-0.0568471	0.108627	-0.0353025	1.29106	-1.16458	-0.48375	0.876464	-2.67107	-1.39935	0.676	-1.93658	0.441908	-0.480207	-2.5273	3.03195	-1.94107	0.00944086	-0.532582
cg01017090	0.531469	-0.112508	-0.420914	0.332442	-4.4268	-12.4682	1.0543	-10.8573	-0.0952809	0.217941	1.6947	1.0186	-0.0438715	1.25465	0.888751	0.265378	-0.313982	1.54318	-1.80564	-0.288467	2.29443	-0.703648	-0.43621	0.862415	0.886185	-0.79159	-0.188026	0.234927	0.687544	0.983531	1.53218	0.394864	0.237574	0.311789	0.520732	-1.20562	1.09025	1.60112	-2.50492	0.296479	0.354398	-0.160522	-0.798268	-1.28735	-1.58499	2.04852	-3.27347	-0.609962	1.43785
cg06324048	-0.665045	-0.761795	-0.253786	-1.36877	-1.98532	-6.36657	-1.28346	-5.96589	-0.648561	0.0171235	0.538267	0.185787	-0.142167	-0.60667	0.418798	0.227492	-0.618715	-1.87275	-1.21848	0.195095	-0.406888	1.53074	-0.376063	-0.14734	1.50277	-0.390765	-0.110568	-0.0585374	-2.08424	-0.101743	1.13239	0.880298	1.0852	0.44583	-1.1198	0.174805	-2.39794	-1.1569	-2.57465	1.86443	1.20423	-4.38268	0.232318	-1.0225	-0.0991757	-1.52311	-0.267939	0.535705	0.0523626
cg24617313	-1.67023	-0.063742	-0.0371765	-1.97432	-0.636716	-1.37358	1.94801	-1.67266	-0.125424	0.103525	2.02434	-1.35866	-1.45247	-1.55309	0.0273469	1.62128	-0.0361047	-0.000287263	2.02619	0.436306	1.82205	-1.27539	0.031505	0.351278	0.119034	-1.7346	-0.272311	-1.51629	0.269639	1.62777	1.98614	-1.55669	1.70646	0.131543	1.73505	1.88855	1.50185	0.0450642	0.0993635	0.0215316	0.20555	-0.345674	0.160311	-0.214233	-0.657843	-1.40779	-1.77598	-1.51028	-0.018279
cg03908391	-0.706516	-0.834538	-1.04109	-0.800574	-3.82877	-5.189	-1.50974	-5.2459	-0.0747532	0.0616373	0.0741473	-0.66382	0.00736532	1.96649	1.30697	-0.0809723	-2.26203	-0.651222	-1.42395	0.00133266	-0.59319	-0.124803	-0.544206	0.488658	1.24425	0.394156	-0.168578	-0.755009	4.46877	0.278775	-0.733031	1.46292	-1.34113	-0.017536	-0.368888	-1.77535	-2.03492	-0.0172962	-2.16993	4.41184	1.03915	-2.8995	0.116101	-0.0472578	0.000676311	-0.958874	-2.14325	-0.838264	-0.975141
cg22290117	0.671033	-0.730847	-1.04615	1.40687	-4.19261	-5.83707	-1.29875	-5.81567	-0.917511	-0.349556	0.514984	-1.98046	-0.568108	0.862219	1.11993	0.13719	0.270635	-0.792786	-0.910666	0.719904	-0.772658	-0.933925	-0.815386	-0.137473	1.16847	-0.313927	1.90227	-0.452368	1.84832	-0.421695	1.79307	1.31062	0.557266	0.232446	0.695841	-1.4559	-3.69796	0.193386	-2.70586	5.37926	0.957458	-1.85427	0.630016	0.576319	0.405041	-0.331192	-0.764888	-0.655293	0.0592378
cg16833551	-0.884345	-0.39009	-0.528588	1.68413	-1.8577	-8.63275	-1.47013	-7.42348	0.387236	0.648581	1.16491	-0.454506	0.860609	1.17865	1.74544	0.809112	-0.107973	-0.0144468	-0.383307	0.209061	0.274044	0.102403	-1.04914	1.24437	2.03486	0.0791655	0.0925555	0.582035	-2.76237	0.554767	0.84601	0.393859	0.812856	0.947072	-0.153673	-0.733788	-1.0911	0.986613	-2.78878	1.65636	1.60873	-3.58282	0.903915	2.50522	3.331	-2.5978	-1.02513	0.0294351	-0.380915
cg03010274	0.0894093	0.408063	-0.939779	-0.587109	-3.27776	-4.03898	-1.11542	-6.21833	0.0170049	-0.647998	-0.0509536	0.134489	0.314452	0.619127	-0.224956	0.187323	0.505093	-0.682294	-0.688875	-0.224565	-0.431044	0.899588	-1.01305	-0.232297	0.834162	1.02883	-0.658565	-0.824023	-0.108861	-0.444246	0.296174	0.040565	0.768841	0.325253	-0.152214	-0.943552	-1.16638	1.35779	-2.71384	-1.65311	1.02248	-0.770524	0.917221	-1.06566	-1.33253	1.61636	-1.36586	-0.822069	0.12345
cg25652859	-0.138108	0.102379	-0.304362	0.0433338	-2.07598	-3.08286	-0.373905	-3.57905	0.506687	0.219247	0.826375	1.81802	0.642284	-0.0614362	-0.121972	0.473044	0.867473	-0.410086	-0.9585	-0.0102316	0.604257	-0.076122	-0.326897	0.674246	0.82861	-0.0775056	-0.439732	-0.37266	6.44887	0.435099	0.739078	-0.278518	0.499414	0.896779	-0.267898	-0.358021	-0.748143	1.61036	-2.61449	-1.36338	0.399394	-0.803925	0.530694	0.562814	-0.542292	2.55815	-1.42644	-0.830121	0.0556764
cg12321149	0.114886	-0.376034	-0.0388022	-0.203351	-1.71823	-2.15723	-0.362538	-3.94085	0.293908	0.243505	0.579298	1.11137	0.354433	0.00899618	-0.0450565	0.612958	0.718892	-0.174867	-1.32826	-0.748316	-0.00321936	0.0395658	-0.221936	0.76998	0.735744	-0.147646	0.0808711	-0.616239	4.5779	1.06348	-0.146444	-0.2152	0.00295631	0.955664	-0.46718	-0.205772	-0.879582	2.12831	-2.14443	-0.568577	0.0712109	-1.04686	0.374585	0.361503	-0.324792	2.4581	-1.17257	-1.05242	0.568841
cg06065549	-0.0225749	-0.504929	-0.216307	0.725691	-2.56719	-3.97388	-0.3356	-5.4423	0.0429928	0.16912	0.870903	1.18395	-0.0429038	0.330794	0.32775	0.563836	0.685858	-0.0702614	-0.495845	-0.123981	0.336786	-2.08817	0.0365083	1.05597	1.10771	1.06479	0.0380005	-0.437948	4.30121	-0.280648	0.867509	-0.356277	-0.217554	0.461452	0.395588	0.114356	-2.04913	1.9065	-2.34512	-0.36604	0.846571	-0.100018	0.668947	0.491339	-1.14013	2.63457	-1.28747	-0.467054	0.508688
cg07105596	1.0934	0.672502	0.698117	1.12706	0.0549692	-2.76158	0.598804	-2.86832	2.16729	1.6849	2.12425	2.04494	1.38171	2.28281	1.74145	1.33583	1.96303	1.34656	0.0271515	0.704544	0.688477	-0.867017	0.11388	1.73587	1.72957	1.36943	0.988503	0.950425	-2.07763	1.06612	1.65778	-0.0602985	0.41468	1.46584	-1.23585	1.04878	0.225565	2.17862	-1.37446	-0.336208	2.80079	-1.20343	1.68538	1.73423	1.47786	-0.353181	-1.11182	-0.701327	2.21019
cg27304369	0.644451	0.307773	0.0687456	0.985706	-1.6535	-4.39246	0.178012	-4.57846	0.810219	0.936546	0.590571	1.24057	1.06786	0.700883	1.22907	0.0335717	1.00018	0.426237	1.29707	0.423755	0.64532	-0.349103	-0.860418	0.90005	1.19241	0.75086	0.856417	0.228379	-3.37611	-0.389761	0.937982	0.799872	-0.162499	1.49823	-0.746999	0.280188	-0.182934	1.52879	-1.53929	-1.35072	1.27289	-1.1444	0.918773	-0.297567	0.925278	1.18384	-1.97101	-0.106196	1.40938
cg26811638	1.64985	-0.00739303	0.455931	1.48163	-1.12443	-2.80349	0.582336	-4.26959	1.05667	0.401205	1.78297	1.50236	1.97153	1.22919	0.49154	0.283388	1.27034	0.298283	0.796903	0.851499	0.791399	-1.50416	-0.0401301	1.86527	1.1766	-0.1064	0.792219	0.728385	-3.50261	0.740346	0.947658	0.56461	0.0611197	1.67418	-0.0521465	0.116289	-1.06777	2.14371	-1.51608	-1.68739	0.29622	-1.23248	1.3492	-0.885199	1.09019	0.381328	-0.762253	-0.957016	1.64855
cg26534489	1.47018	0.25863	0.596219	1.71319	-0.828111	-2.7719	0.524026	-4.98353	1.41206	0.769051	1.71349	1.37196	1.85298	1.0594	1.10802	-0.0852622	1.00005	0.270509	0.669163	0.809294	0.212532	-1.35797	-0.599465	2.17452	2.06311	1.04312	0.961782	1.202	-4.8872	0.211532	1.84237	-0.103195	-0.288252	2.42251	1.47691	-0.429819	1.08755	2.67433	-1.61141	-1.03838	-0.140947	-0.303666	2.13265	-1.14019	1.44283	0.827546	-1.20944	-0.822309	1.77968
cg08587534	0.807952	0.495168	0.100758	1.06015	-1.89753	-4.53915	-0.439255	-7.00097	1.3542	0.450744	1.14329	1.04455	1.51073	0.799479	1.18117	0.488983	1.03584	1.21867	-0.813897	1.55493	1.02036	-1.00753	-1.31259	2.10506	2.12714	0.464341	2.04312	0.246325	-6.8157	-0.593098	-0.00339002	-0.343699	-0.0954702	2.65412	1.37842	0.416201	0.530652	1.04447	-1.5329	-2.38898	1.61893	-1.5794	0.756753	-2.26537	-0.0606565	2.50221	-2.0529	-0.313426	1.56536
cg14564778	0.286887	-0.912873	-0.160729	1.21377	-0.820041	-2.35634	0.906419	-3.53324	0.750687	0.281349	0.0826454	1.14376	0.64806	1.2009	0.0843228	0.595047	-0.511427	0.32844	-0.378452	-0.422344	1.02047	-1.04773	0.707243	1.06325	1.21061	0.396236	0.269325	-0.626887	-3.36994	0.476636	0.445669	-0.866949	0.506896	0.948234	0.755984	-0.51473	-0.183825	1.63809	-2.44038	-0.240381	0.312571	-2.54894	0.196256	-0.394709	1.15159	2.50469	-1.77428	-0.0219757	0.487054
cg01817393	-1.41023	-1.17941	-0.498845	0.848744	-0.756841	-1.51517	-0.808683	-1.70457	-0.347806	-0.708051	-0.122819	0.394177	-0.0634777	-0.00342835	-0.0552924	0.405856	0.847327	-0.592594	-1.27746	-0.23194	1.26241	-1.069	-0.433026	0.79773	1.04864	-1.22059	-0.651059	-1.17008	-0.301424	-1.32511	0.352499	-0.582684	0.594848	0.449195	-0.218194	-1.34426	0.0596554	2.23867	-1.59323	-0.505611	0.442587	-0.821491	0.256564	-0.266868	-0.474404	2.20428	-1.2418	-0.892323	0.945928
cg04257105	0.0952193	-0.330832	0.515337	-0.0824857	-1.28972	-1.10768	0.050161	-2.02491	0.309406	0.530858	1.33322	1.0286	0.748708	0.33415	1.0517	0.98628	-0.420898	0.53279	-0.117888	-0.193102	0.793288	-1.37044	-0.0477996	1.65308	0.918066	0.305723	0.865629	-0.596902	-3.38868	-2.13878	1.04113	0.205764	0.660756	1.26596	0.351085	0.329683	-0.268707	1.2083	-0.931367	-1.18116	0.916391	-0.509313	0.419561	-0.138688	0.334235	1.93609	-1.58785	-0.591085	0.446807
cg27661264	0.0962216	0.747484	0.302652	0.228119	-1.29103	-2.083	0.288509	-2.95747	0.663963	-0.299585	0.695966	0.799424	0.705593	0.593413	0.563684	0.63829	1.03726	-0.00325185	-0.751073	-0.346958	-0.126784	-0.986555	-0.53257	1.50263	1.2076	1.15854	0.151937	-0.955983	-1.54721	-0.339593	0.700726	-0.256325	0.550724	1.40877	0.684134	0.303314	-0.913297	1.41244	-0.690756	-1.00367	0.190426	-1.79556	0.287862	1.19244	0.693987	-1.6256	0.114662	-0.149351	1.38595
cg19589727	0.543196	0.450837	-0.356522	0.270738	-1.39171	-2.41374	-0.659027	-3.26822	0.467311	-0.462413	0.381503	0.372422	0.151061	0.467122	0.4273	1.52006	0.243434	-0.323071	-0.70971	-0.25313	-0.645205	-1.0363	-0.466561	0.242717	1.02079	0.520031	0.194563	-1.10939	-0.853162	-0.240418	1.02674	-0.114574	0.585815	0.596994	0.502056	-0.0164173	-1.64899	1.38582	-0.999734	-1.9609	0.953039	-1.60644	0.541573	0.34733	1.12917	-0.473749	-0.351786	-0.386868	1.366
cg10302550	-0.0968063	0.144332	-0.0494111	1.07869	-0.738713	-3.54184	0.745022	-4.46746	0.95754	0.119388	0.862113	1.0114	0.497546	1.62848	0.958029	1.36598	2.30506	-0.0062487	-1.08028	0.291496	-0.193246	-0.816231	-0.172537	1.65053	1.3976	0.0109418	1.04403	-0.882156	-2.16673	0.0783823	0.699901	0.0364124	0.280294	1.12813	0.191121	0.24152	-1.12121	1.92673	-1.25201	-1.53877	1.01116	-2.3303	0.311056	-0.0775433	0.778651	-0.362647	-0.656112	-1.04417	1.33512
cg17414107	0.8456	0.820759	0.18855	1.91015	-1.41677	-4.58807	0.143585	-3.95198	0.804681	-0.613722	1.37123	0.840213	0.277121	1.14	1.19114	1.45427	2.16013	0.242798	0.795681	-0.111972	-0.24446	-1.62854	-0.15089	2.08304	1.83327	-0.0112804	0.250863	-0.943939	-1.64892	-0.571959	1.12812	0.10731	0.74283	1.78886	-0.0211554	0.479906	-1.70928	1.93498	-1.01492	-1.9155	0.992078	-2.6092	-0.272296	1.49322	0.204478	-0.153791	-0.0767698	-1.66408	1.0693
cg00943909	0.774661	0.314252	1.03965	1.22802	-0.09968	-4.05493	0.88991	-3.95077	0.686371	0.0368494	1.48547	1.34688	0.21321	1.14083	0.543417	1.10048	1.94991	0.92752	0.67514	-0.187716	0.281015	-0.992909	0.63722	1.97361	1.79886	0.613221	0.884247	0.219323	-3.30446	0.280794	1.24961	0.642737	0.474729	1.12367	0.846667	-0.103341	-1.62819	1.95519	-0.762486	-0.194094	0.857943	-1.85906	0.408232	0.999484	1.02634	-1.45562	0.533295	-0.0729119	1.70829
cg19640589	0.0793344	0.753771	0.693446	0.518343	-0.756199	-4.45826	0.049349	-4.35657	0.399892	0.282526	0.692758	1.08409	0.0625235	0.761233	0.254933	0.758163	0.53278	-0.240536	0.194931	0.0222295	-0.44944	-1.30544	0.0485623	0.738784	1.2216	-0.187168	0.714017	-0.942586	-2.17814	-1.30955	1.04505	0.159621	-0.225261	0.990281	0.0703284	0.00298843	-2.83161	1.72488	-1.21491	-2.16897	1.29026	-1.0894	0.244627	-0.662893	0.49218	-2.18361	-0.0630422	-0.584609	0.608793
cg21988465	0.339758	-0.340391	-0.0263857	-0.185292	-3.20834	-6.36851	-0.224562	-8.68287	-0.344774	0.45421	-0.526464	-0.35956	1.50487	0.322163	1.08358	-0.297392	-2.52379	-0.933665	-1.27897	0.983615	-0.204764	-0.719019	0.575705	2.08857	0.957804	0.501555	-0.425434	0.461302	-1.7286	1.33619	1.38588	-0.450956	0.895775	0.477253	1.25936	-1.60403	-1.14973	0.0847289	-3.71013	-1.31558	1.01937	-0.512513	0.292149	-1.46076	2.38323	-0.254267	0.725963	0.384082	-0.107538
cg07284407	0.120731	0.701712	-0.20737	-1.16028	-1.16545	-2.64487	-1.24885	-5.59462	-0.378008	0.0540292	0.626682	0.00596542	0.0404464	-0.878566	0.774659	0.96483	-5.70791	-0.32434	-1.04247	0.486909	-0.927319	-0.2858	-0.71865	1.14898	-1.1081	-0.67637	-1.12077	-0.226546	-6.04587	0.169364	0.754053	-0.808753	1.42656	0.548965	0.472802	-0.182373	-0.527668	1.19466	-2.56521	-3.52717	0.38654	-1.52869	0.0841493	-0.399793	-2.64306	2.62893	-0.0707919	-0.234647	0.212506
cg21625881	0.0700033	-0.506833	0.0168954	-0.210976	-3.65795	-2.55561	-2.11969	-6.15744	-0.583423	-1.14684	-0.571575	-0.422592	-0.417907	0.0489164	-0.144414	0.829981	-1.06511	0.0438738	-0.824904	1.00124	0.440813	-0.845713	-0.576057	0.763864	0.687855	-0.354964	-1.17459	-0.721789	-0.412183	-0.592332	0.607381	-0.400207	0.750877	0.37694	0.165953	-1.45903	-2.05087	1.51649	-1.9063	-4.07828	0.927495	-2.49821	1.40166	-0.683428	-3.41275	0.368898	0.137732	-0.300283	-0.366269
cg14203179	0.88756	0.751072	0.192168	0.105575	-5.50541	-4.42191	-0.332227	-7.51827	-0.00910883	0.522649	0.5097	-1.12425	1.35581	0.494285	0.488771	-0.16445	-0.520717	0.0113587	-0.590916	1.24786	0.778118	-0.901673	-1.00345	1.18513	1.62818	-0.54003	0.0779096	0.484533	-6.37962	1.44331	0.232525	1.33023	1.29457	-1.97764	-0.0134066	-0.977531	-4.27679	-0.0937325	-3.39978	-0.328219	2.08804	-3.22792	0.792944	1.88376	-5.67352	-4.69427	0.790105	-1.86521	-0.885498
cg09437522	-0.938847	0.521032	-0.144041	-2.63354	-3.16248	-4.86488	1.57165	-5.5438	-0.470306	-0.211938	-0.299172	-1.38784	0.210813	0.34413	-0.60218	0.0245039	-1.42892	-2.76844	-0.604176	2.59109	1.86602	-1.02663	-0.204987	0.397572	-0.0644666	-1.63589	0.132251	-0.67338	2.9986	-0.979415	2.78065	0.851596	0.739152	0.686367	-0.608584	0.61486	1.57533	0.506812	-2.32441	0.356492	0.353323	-1.36447	0.367666	0.0130392	-1.15798	-2.30011	-0.198699	-0.704037	-0.799819
cg10468484	-0.691999	0.132889	-0.669921	-2.03515	-4.02444	-12.3837	-0.478625	-10.4246	-0.207066	-0.915697	0.0637944	-0.985193	0.919143	0.736986	-1.58614	-0.193944	-2.34682	-1.16869	-0.851003	-0.0395742	-0.982275	-1.02194	-0.364506	0.400761	-0.00261773	0.0820522	-1.6143	0.391965	5.79939	-2.22359	1.80185	1.75799	2.02452	0.0965282	0.726716	0.0236982	-2.82177	-0.63955	-5.78011	0.488746	0.362388	-1.00412	0.852345	0.881294	-3.51913	-2.24281	-0.271594	0.655715	-0.383918
cg22741626	-2.88189	1.22093	0.939636	0.61609	-0.308134	-1.27028	0.786488	-1.15793	-0.166742	0.174911	1.08138	-0.795893	-1.24893	-0.173526	0.0588976	1.5316	-1.54257	-0.131768	1.11353	0.19487	-2.7099	-1.5158	0.0772255	-0.437877	0.157744	1.09446	0.885773	-0.133953	0.124561	-0.134705	0.147799	1.42835	1.34746	0.160841	1.13165	0.00340266	1.05187	-0.973543	-3.05816	1.95165	-0.199048	-1.50814	0.0319151	1.2331	0.919715	1.46921	1.37112	1.79789	-0.280566
cg18997188	-1.15039	-0.93009	0.479562	-1.22639	-2.53648	-0.151071	0.0487997	-3.16767	-0.20139	-2.01565	0.768579	0.0954785	0.50802	0.521779	0.864798	0.38298	-1.4584	-0.519987	0.748783	1.18168	-1.66997	-1.5446	-1.86653	0.553074	0.186898	-0.935754	0.0337774	-0.992293	-0.109426	-1.6821	-1.51162	1.39939	1.2264	0.105291	0.93647	-0.448224	1.32449	1.18971	-4.82924	2.60738	1.02	0.847855	-0.215314	2.56252	1.15626	0.83801	-0.78282	0.968557	0.261806
cg20213508	-2.65668	0.646357	0.326621	-2.96704	0.677758	0.183601	0.384729	-0.739496	0.0393402	-0.678124	1.36374	-1.63259	-0.959071	0.591405	1.88465	0.447024	-1.7349	0.0341673	0.782256	0.373172	-0.762494	0.161436	-0.326801	-1.50539	-1.34624	-0.191787	0.414768	-0.23585	-8.89358	-0.392064	0.294373	0.637871	1.98446	-1.64558	0.0115144	0.513451	-1.90593	-1.28255	-2.18822	-1.27493	-0.345085	-4.7854	-0.158887	-2.74456	2.6005	1.34255	-1.01456	0.449815	-0.300437
cg04779428	-1.94142	-0.361183	0.980372	0.928307	-1.1323	1.13788	1.435	-3.04047	-0.0437665	0.40177	-0.355222	0.0982169	0.316658	1.35423	0.489822	0.560505	-0.244542	-0.367351	0.543908	0.564179	0.124674	-1.47552	-1.54216	2.62324	1.11991	-0.224434	0.564595	-0.515536	-0.422158	-1.77347	-1.93328	0.129662	0.445011	1.12706	1.7387	-1.60061	1.5331	1.65303	-0.984758	2.60294	0.72496	-1.06448	0.37756	-0.780504	2.85259	-2.57228	-0.475725	0.26937	0.296668
cg04019914	-0.851494	0.353107	-0.564247	-0.177619	0.326861	-3.6903	0.870838	-1.69668	-0.274444	-0.181463	0.640475	-2.65645	0.161022	-2.28926	1.67792	-0.854261	-2.10833	0.121213	1.89024	1.3809	-1.53531	-1.21509	-0.849724	0.351067	-0.0318742	1.32018	0.467214	0.659701	-2.73181	-3.81164	-0.45741	0.912997	1.25355	-2.01531	1.25846	-0.0550585	1.05427	0.227021	-1.63908	1.3586	1.11005	-1.64505	1.09759	1.79937	0.826496	-2.40007	0.458832	-0.186006	-1.97859
cg11357538	-1.51151	1.27683	-0.0658649	-0.504653	-4.33935	-5.0948	-0.526894	-7.73497	0.208606	0.0614684	1.45605	0.252744	-0.889634	-0.447162	0.0554333	1.13792	-0.34048	-1.09802	-0.610687	0.427074	-0.969787	-1.11321	0.27596	0.0495244	-0.825192	-0.539326	1.11683	-0.848202	-3.73682	-2.56427	0.571999	-0.706769	0.953323	-0.189587	-0.000257472	-0.518832	-2.98643	0.471683	-3.84969	1.00025	-0.435647	-3.58997	0.624077	-4.03847	3.37738	-0.601647	-0.784629	0.157854	-1.56121
cg20008140	-0.054794	1.30184	0.416201	-2.23003	-0.143179	-4.10408	0.27033	-3.55576	-1.25181	0.441002	1.10436	-1.29099	-0.294211	0.167368	0.438059	-2.23884	-2.57485	-1.75759	0.194656	-0.0655196	0.0596435	-0.80116	-0.400119	0.839381	-0.42672	1.23573	1.50658	0.32013	-2.52739	-2.72465	-0.610095	0.226938	-0.237007	-1.16086	-0.100181	-1.17509	-2.4171	0.864303	-0.558515	-1.83248	0.462651	-2.76221	1.06622	-1.43625	-0.386812	-0.241149	-1.61855	0.380357	0.601634
cg11480267	-0.46605	1.10171	1.38185	-2.03948	-1.93579	-2.72499	1.28253	-3.22263	0.272142	-0.302873	0.3764	-0.818042	-1.13311	-3.64839	0.0574378	0.320375	-2.3338	-0.728468	0.582857	-0.885808	0.166187	-0.157391	-0.0557072	-1.42055	-1.2667	1.55642	1.31708	0.178144	-1.15263	-0.511979	1.68203	1.21879	0.257666	-0.784541	-1.09871	0.0912696	-0.615183	-0.178991	-1.93378	-0.651524	-1.035	-1.21855	0.599335	-0.261468	0.222666	0.953856	-1.23924	1.46392	-0.54887
cg10011623	-0.741339	-0.110727	-0.55307	-1.90383	-0.17578	-3.72881	-2.86362	-3.46026	-1.03657	0.589744	-0.168093	-1.93877	-0.424694	-0.462936	-0.195139	-0.256904	-2.34827	-2.59265	-1.13544	-0.146094	-0.969114	-1.21513	-1.49672	0.627597	-0.341834	1.14527	-0.344635	-0.36161	-1.28541	-2.35529	-1.41469	-0.474004	1.00174	-0.650701	1.00766	-1.39781	-2.02573	0.296842	-1.9735	-1.91449	1.49915	-3.1883	0.611166	0.0232476	2.00035	-2.25575	-1.67336	0.80872	-0.504863
cg01748573	-0.777309	-0.49861	-1.28461	-0.421066	-1.12852	-2.56111	-1.62562	-2.91971	-0.355079	-0.098199	1.10098	-1.07709	0.0539669	-0.142867	0.00823251	-0.313794	-1.67613	-1.42016	-0.704531	0.778991	-0.526524	-0.867798	-0.778922	1.26896	0.171591	-0.540546	-0.20419	0.193552	-0.847463	-1.82854	-1.0356	-0.471547	0.977579	-0.362119	0.0296441	-0.547964	-1.47243	-0.0149166	-2.02697	-1.01108	1.09239	-1.33562	0.578552	2.26839	1.75536	-1.36082	-0.705674	-0.717498	-0.830656
cg17334845	-1.43147	0.692537	0.259941	-1.3369	-3.7789	-6.34309	-0.925849	-5.77041	-0.537657	-0.606312	0.0206911	0.28769	-0.0329371	-0.569936	-0.252751	0.43331	-2.04966	-1.69139	-1.11295	0.359177	-0.360019	-1.23226	-0.618409	0.181012	-0.530748	-0.144771	0.12551	-0.379908	-2.81677	-1.40143	1.02818	-0.0617625	1.20093	-0.119434	-0.083269	-0.627983	-1.98799	1.2306	-3.40085	-1.92836	-0.132506	-1.24958	0.726334	-1.6623	-0.638847	-0.105437	-0.447393	-0.0647778	-0.482779
cg26767990	-1.07125	0.715099	0.826569	-1.54833	-3.12955	-6.23447	-0.773795	-5.28103	-0.469688	-0.696857	-0.153317	0.086798	0.338387	-0.73702	0.341554	0.384036	-1.74742	-0.967929	-0.143493	0.26321	-0.13119	-2.13166	-0.960407	1.18452	0.0580537	0.496908	-0.0125991	-0.472572	-2.17869	-1.26516	1.0866	-0.345002	0.768097	-0.410142	-0.250057	-0.75633	-1.50053	1.06884	-2.63562	-2.14547	0.326167	-1.54171	1.59116	-1.59931	0.0375409	-0.0494397	-1.0422	-0.277634	-0.127588
cg17652507	0.661653	0.449413	0.213332	-0.0553448	-4.0893	-3.72233	-0.701099	-4.46203	-1.4137	0.432685	-0.0748732	-0.868019	0.910666	-0.0666487	0.550057	0.28903	-1.6097	-0.326604	-1.12547	1.16955	-0.415093	-0.847067	-0.672986	1.84119	0.72119	-0.244106	0.168898	0.402126	-4.35173	-1.63556	-0.24947	0.183072	0.49043	-0.575774	0.677515	-0.681032	-3.02399	-2.12713	-1.82328	-2.82148	1.51278	-3.27592	0.950364	-0.881896	1.70481	-0.88762	-1.30353	0.0736588	-0.30579
cg22407822	0.0760305	0.921072	-0.0345309	-0.278107	-3.24138	-3.31574	-1.35662	-4.05152	-0.827755	0.372951	0.83201	-1.01367	0.364063	-0.193968	0.863413	-0.387907	-1.25944	-1.0886	-0.264758	1.08233	0.019386	-1.36672	-0.018883	2.11459	-0.0255696	-0.908293	-0.102791	-0.755617	-3.59012	-2.24079	-0.590073	0.422864	0.189376	-0.157167	0.215121	0.195989	-2.85789	-1.98789	-1.21097	-2.94919	1.15239	-3.35763	0.571114	-0.554626	2.14893	0.183694	-0.740869	-0.467546	-0.403365
cg07341934	-0.241057	0.467125	-1.60799	-0.205413	-2.34739	-3.98247	-0.377378	-5.15139	-1.35649	-0.139843	-0.157974	-0.850259	0.272684	-0.807354	-0.382884	0.715111	-1.21113	-1.68153	-2.10088	0.348181	-0.951338	-0.454507	-1.42731	1.23058	-1.12213	-0.659612	-0.653946	-0.47404	-3.21104	-0.830777	0.130892	-0.23878	0.569959	0.0832603	-0.48357	-0.947536	-3.26079	0.269564	-2.64972	-2.53198	1.49712	-3.29006	1.3183	-1.3493	0.563829	-1.23091	-2.34681	-0.17548	-0.584832
cg02107718	0.376078	0.649244	-0.579545	-1.16682	-1.62689	-3.35895	-0.308407	-4.76327	-1.64861	0.400886	-0.0468804	-0.616155	0.663023	-0.423471	-0.0866657	0.445469	-1.38034	-1.55509	-1.50039	0.212027	-1.20236	-0.609173	-1.14929	1.41904	-1.10156	-0.470532	0.255856	-0.372316	-2.42273	-0.988521	0.578005	0.451208	0.368252	0.605805	0.655238	-0.959838	-2.56242	0.427748	-2.6471	0.698409	1.10454	-2.58084	1.22728	-1.19237	0.778672	-0.979875	-1.38324	-0.392038	-0.537483
cg23496597	-0.38827	0.653777	-0.421425	-0.839544	-1.78914	-2.82156	-1.59353	-3.06531	-1.07901	0.231631	-0.107835	-0.223692	0.41644	-1.13112	-0.0795301	0.468185	-1.81628	-1.57172	-1.726	-0.2718	-0.804541	-0.253555	-2.13854	-0.0332627	-1.10079	-1.31582	-0.683792	-0.305532	-2.68403	-0.554342	-0.306373	-0.204609	0.237552	-0.0190001	-0.373278	-0.457394	-2.61729	-0.0277132	-1.86319	-0.976376	1.48026	-2.02833	0.890726	-2.02208	0.328026	-0.428097	-1.14057	-0.700342	-0.463712
cg25308079	-1.61238	0.393363	0.546948	-1.48922	-0.717977	-11.0877	0.374037	-5.96625	-0.721023	-0.717171	-0.402984	0.606973	-0.867249	0.0362553	0.232546	-1.5235	-2.09914	-1.37073	-1.08846	0.325209	-1.07181	-1.55189	-0.254331	0.403531	-0.930884	-0.806282	-0.905848	-0.565047	-6.59466	-1.54323	0.612512	0.331514	0.505723	-0.962522	0.545974	-1.9766	-2.448	0.434847	-1.8552	-8.95419	0.211342	-2.14142	1.73553	-3.35643	-2.67145	-1.50942	-1.53928	-0.848641	-0.427102
cg09772382	-1.12609	0.363343	0.929541	-0.571477	-1.78092	-10.4848	0.231964	-6.23313	-0.811	0.0904751	-0.852772	-1.70231	-0.483276	-0.347533	-0.2487	-0.587618	-1.37253	-1.10781	-0.440093	0.128255	-0.215741	-1.93034	-0.748806	-1.63734	-1.21602	-1.26201	-1.37647	-0.46216	-5.24116	-1.55213	0.566365	0.50586	0.0589563	0.0819022	-1.28483	-0.777133	-1.08071	0.691441	-2.44629	-8.31213	-0.987614	-2.54467	0.937962	-2.30566	-2.21221	-2.43494	-1.27941	-0.369882	-0.221812
cg15222215	0.681757	1.069	-0.507961	0.0109335	-1.66664	-4.49208	-0.0730499	-5.42364	-0.916311	0.220326	0.286726	-1.23094	0.580187	0.0912213	0.835537	0.828165	-1.8973	-1.32568	-0.882541	2.11849	-0.986205	-1.27937	-0.914106	1.37493	-1.16355	-0.83795	0.678601	0.277984	-5.27062	0.296812	0.985726	-0.44045	0.256766	0.304551	0.279699	-0.849004	-2.69796	0.241707	-2.35591	0.277027	1.80878	-2.20348	0.921405	-0.830016	1.03035	0.0823569	-0.890283	-0.265065	-0.578151
cg14263118	-0.185255	0.466516	-0.48018	-0.229176	-2.17061	-4.40899	0.261451	-5.40918	-0.90514	0.476053	-0.0626308	-0.753254	0.560864	-0.851247	0.618438	0.63865	-2.33517	-1.52609	-1.66664	0.128889	-0.97395	0.148772	-0.994079	0.691312	-0.702353	-0.111298	-0.246258	-0.227227	-5.65557	-0.1653	0.251121	-0.721433	0.468722	-0.303081	0.631498	-1.05567	-2.9998	0.777122	-1.8361	-0.657388	0.827172	-2.93415	0.736127	-1.95743	0.980124	-1.22702	-1.11219	-0.413217	-0.441904
cg11244758	-0.156914	0.414857	-0.816667	0.791593	-1.86492	-4.00548	1.12454	-4.45053	-0.462113	1.3143	-0.626852	0.158	0.833288	1.48331	0.610942	0.452112	-2.56231	1.57627	0.0071661	1.39164	0.464816	-0.428074	-0.0662079	4.76628	0.349458	1.10055	-1.3024	0.682946	1.99267	-0.437206	0.884483	0.223049	-0.292385	1.14282	1.82327	-0.793375	-1.93932	-0.449768	-1.57136	1.71782	0.863842	-1.57119	0.539061	-1.83786	0.602444	2.34292	-0.493028	0.743405	-0.161239
cg18160880	0.456047	0.412381	-0.134024	2.6401	-0.889511	-4.79211	2.08624	-4.08673	1.21929	1.83077	-0.129623	-0.217891	0.136209	1.27195	0.804852	0.47609	-1.41062	1.76112	2.22466	2.04315	0.725719	-1.79	1.01336	5.09817	-0.330075	1.07333	0.314918	1.28421	2.25499	-0.371071	2.22367	1.35016	-1.23284	-0.00869678	3.18452	-0.998477	-0.605421	-0.847626	-1.00195	2.07367	0.532838	-1.13248	-0.143425	-1.42923	-0.0220436	2.3992	-0.56397	0.492714	-0.132369
cg05926269	-0.526882	0.444149	-0.389585	0.557508	-1.72592	-5.98238	0.703975	-6.2978	-1.61455	0.512412	-0.674397	-1.49727	0.510793	0.0510673	0.600935	0.619113	-3.84269	-0.878082	-1.54889	1.07098	-0.480851	-2.07243	-0.905934	2.77592	-2.11682	-0.076996	-0.330103	1.16389	3.55572	-1.32859	-0.555042	1.00823	0.193609	0.00508885	0.418946	-1.49384	-1.51183	-1.89504	-1.51399	-0.396542	1.76423	-1.89224	0.262382	-0.436392	0.238792	1.62999	-0.454536	0.471791	-0.972993
cg03821543	0.0382111	1.07736	-0.630372	-0.664721	-2.92227	-3.63642	-0.774252	-3.94621	-0.840725	0.690802	-0.195678	-0.83299	0.573609	-0.996218	0.209015	0.804714	-3.91803	-1.40617	-1.55393	0.0260699	-0.626247	-1.00368	-1.64466	1.69166	-1.05436	-1.28859	-0.587287	0.178373	2.10834	0.0161935	-0.232877	0.387793	0.0207095	0.206525	0.0890534	-1.468	-1.52843	0.160896	-2.20335	-1.63968	0.356666	-1.83587	1.12779	-2.35601	0.663692	1.43671	-0.590473	-0.190304	-0.560525
cg01538522	-1.38982	0.420549	-0.0888012	-1.15606	-2.33403	-3.71584	-0.516081	-2.84305	-1.23327	-0.481382	-0.671734	-0.751448	0.330569	-0.355926	-0.0227433	0.175131	-2.21527	-1.40703	-1.2065	0.124929	-0.81456	-1.37207	-0.330259	0.591703	-0.615197	-0.295552	-1.21758	-0.817625	-2.56883	-0.862256	0.98499	-0.0919381	0.692631	-0.15851	0.449411	-0.343272	-1.10573	0.279291	-1.96461	-3.14849	-0.702392	-1.96551	0.924742	-0.759269	-1.17035	0.0618161	-0.870203	-0.412534	-0.367433
cg00267746	-0.0932661	0.141899	-0.369909	-0.456301	-2.78215	-3.64472	-1.07194	-2.89861	-0.931422	-0.0964987	-0.702106	-1.19046	0.79478	-0.39559	0.435171	0.074874	-2.06715	-1.21781	-1.13673	-0.0995574	-0.965385	-1.16118	-1.32126	1.2082	0.0531672	-1.0528	-1.01864	-0.579771	-3.38812	-0.263638	0.937305	-0.635985	0.412782	0.425831	0.414495	-0.459729	-1.597	0.294224	-2.31711	-2.83456	-0.0223048	-1.92478	0.789764	-0.491273	-0.759545	-0.0266998	-1.00496	-1.0154	-1.0743
cg03837903	0.33768	0.871367	1.01756	-1.04312	-1.79281	-3.15911	0.824909	-1.56383	-0.45582	-0.832599	-0.40252	-1.23641	-0.668174	0.524385	0.552688	0.334904	-2.57819	-1.28693	1.84013	-0.52285	-0.326905	-1.02919	0.288227	-0.0565175	-1.21633	1.06805	0.82327	0.822371	-2.98287	-0.263598	1.50597	0.280416	0.280311	-0.947374	-0.611171	-0.855836	-0.0413214	-0.518403	-1.53035	-1.40386	-0.948658	-1.6686	0.465434	1.35761	-0.95813	2.16902	-1.64793	0.0829978	-0.794767
cg23159236	-0.423113	0.481844	-0.163193	-0.829116	-2.14178	-2.94261	-1.14192	-1.87131	-0.677604	-0.364497	-0.838721	-0.245623	1.0694	0.640901	0.417905	-0.141275	-2.24109	-1.80043	0.56969	0.800957	-0.434994	-1.13655	-0.09795	0.062672	0.308097	-0.661708	-1.12328	0.362966	-2.64615	-0.932047	1.22832	0.228478	0.693525	-0.323865	0.443524	-0.115508	-0.564034	0.114009	-1.45092	-2.67691	-0.53789	-1.44651	0.728416	-1.05718	-1.83057	0.268146	-0.877849	-0.890686	-1.19228
cg22798925	-0.322078	0.977022	0.191336	-2.70375	-1.92727	-3.93032	-2.47758	-5.13902	-1.631	0.476957	-0.474509	-0.367213	0.641942	-0.337868	0.873103	-0.267137	-4.18486	-2.42966	-1.33813	0.77734	-0.677895	-0.381589	-1.23639	0.322054	-0.459697	-2.02017	-0.883279	0.435146	0.994509	-0.723738	0.00770294	0.282813	0.239604	0.319361	-0.114179	-1.8513	-1.45724	-0.893219	-1.72579	0.684911	0.209877	0.103159	0.278262	-3.86775	-0.691269	0.472101	-0.351333	-0.324076	-0.0913474
cg20126878	-0.876422	-1.43545	-0.724513	-1.33179	-3.51857	-4.29506	-2.63172	-5.53799	-0.429836	-0.609171	-0.578132	-0.0953691	-0.179211	-0.364259	0.409117	0.517135	-2.2571	-2.10738	-0.0784485	0.548641	-0.582252	-1.40899	-0.852159	0.925943	-0.634682	0.442288	0.182529	0.693167	-4.00956	-0.529209	1.20958	0.235805	1.47376	-0.39518	-0.0260355	-2.2643	-3.18899	1.39685	-3.31284	0.359443	0.035404	-1.01178	1.41231	-0.579749	-0.523619	-0.431831	-0.895045	0.0819757	-0.333003
cg27027803	-1.25486	0.477879	-0.276052	-1.21564	-4.24151	-6.22958	-0.958273	-7.87984	-0.534032	0.624509	0.102495	-0.0159233	-0.137154	0.291762	-0.221912	-0.287024	-4.32227	-0.848962	-2.47909	0.659008	-1.06534	-1.18057	-0.736525	0.253075	0.288585	0.0337859	-0.590037	-0.154168	-3.71661	0.465526	1.07559	-0.176236	1.05721	1.20706	0.262575	-0.868563	-2.10767	0.593378	-3.5747	3.85307	1.28538	-1.59486	1.14459	-1.00744	-1.25352	-0.600086	-0.775109	0.447366	-0.679168
cg22639787	-1.49863	0.855257	-0.359846	-0.701998	-1.83518	-7.55238	-0.459649	-8.96344	-0.347419	1.1893	-0.0172011	1.01673	0.210837	0.550163	0.420962	-0.184655	-2.21753	-1.44705	-1.55362	0.484026	-0.503058	-0.386915	-0.707385	0.401656	0.53829	-0.666435	-0.366799	0.344758	-3.73823	-1.35549	1.01923	0.234775	0.945816	0.371844	0.0443701	-0.560808	-2.4133	-0.305398	-3.33172	3.4975	0.677602	-0.92127	0.594731	-1.79029	-2.03151	-0.642357	-0.264682	-0.765077	-1.63019
cg05960039	-0.718038	0.829752	1.06753	-0.613205	-1.86002	-3.38386	0.0287035	-4.07908	-0.152329	0.615756	0.66963	0.761484	1.59906	0.424619	0.628767	-0.0291713	-0.817541	-0.103054	-0.454977	0.555417	-0.0826351	-0.621602	0.0494634	0.736197	-0.142922	0.0568038	-0.0536328	0.178932	-3.77965	-0.683323	0.239403	0.036843	0.413694	-0.177528	0.18019	-0.384523	-0.00986264	1.40655	-1.68181	-1.8131	1.6013	-0.529852	1.37185	-1.18916	-0.136599	-4.98171	1.07447	-0.580556	-0.665431
cg09604333	-0.606797	1.06817	1.22982	-0.000306119	-3.07449	-5.86769	0.454952	-5.9783	-1.10953	0.333033	-0.307084	0.383953	1.49649	-0.124725	0.791697	0.0182604	-0.564959	-0.336989	-0.953332	0.722778	-0.393278	-0.522747	0.356389	0.655588	-0.20867	0.217383	0.145632	0.0353338	-6.14783	0.747471	0.868983	-0.793462	0.730511	-0.179386	0.766993	-0.933412	0.324616	1.76243	-0.111996	-2.52159	1.44907	-1.44073	1.11172	-1.11729	-0.555933	-7.50204	1.56761	-1.42084	-0.723018
cg06047881	-0.52877	-0.0474452	1.79	0.519767	-2.29042	-3.981	-0.232238	-3.22415	-0.0150968	0.0296368	-0.062949	-0.127797	1.06442	0.932616	0.145789	-0.806496	0.136656	-0.0277959	0.24882	0.4906	0.396186	-0.111413	1.67385	1.08252	-0.877274	-0.0975123	-0.210918	-0.531493	-4.90613	0.499266	0.701369	-0.0411743	0.348145	-0.564174	1.31495	-0.90136	0.00502746	1.38123	-0.115741	-1.49466	1.19738	-1.95475	0.922337	0.413979	-2.56671	-4.04115	0.988403	-0.491266	-0.922388
cg20018057	-1.17601	0.539559	0.577035	-0.635687	-2.89678	-4.66886	-0.934983	-4.0829	-0.27012	-0.571232	-0.431593	-0.102214	1.55875	0.333921	0.0447738	-0.0562063	-1.03459	-1.0278	-0.673094	-0.561657	-0.642353	-0.169357	0.680932	0.446702	-0.895994	0.123642	-0.747727	-0.327631	-5.48231	-0.704617	0.277704	-0.329	0.058329	0.274995	0.871422	-1.4511	-0.810133	1.38423	-0.663143	-1.59884	0.701674	-2.07397	0.868859	-0.176855	-0.611558	-5.15778	1.08983	-0.925796	-0.893706
cg10748817	0.0215483	0.529333	0.366545	-1.52595	-2.47014	-2.83957	-1.42739	-3.93786	-0.0447316	0.516394	-0.0865947	-0.0278184	0.632905	0.854921	0.782463	0.101804	-1.4508	-1.39318	-1.31748	1.55509	-0.171357	-0.523344	-0.622581	-0.306882	-0.206587	-0.823623	-0.806776	0.154398	-1.51449	-1.36101	0.572953	0.0336507	1.30286	0.228339	-1.17564	-0.0248707	-0.485694	0.602021	-2.21525	-2.78306	1.67248	-1.63463	1.06741	-1.83916	-4.11051	-0.121248	-0.2646	-1.33321	-1.95347
cg00606841	-1.68247	-0.345416	-0.538274	1.54191	-0.86102	-5.5315	-1.53998	-5.90988	-1.53189	0.738778	-1.44774	-0.531769	-0.257501	-0.0179921	0.228009	-6.32412	-2.07292	-1.69499	-1.50143	-0.128648	-1.89532	-1.46891	-0.823542	-0.0884577	0.130287	-0.395308	-0.043008	0.212745	5.27418	-1.58099	0.404841	0.389256	-0.845093	1.44545	-0.205712	-1.22373	0.498923	0.954039	-7.09867	-2.75466	0.695518	-1.99357	-4.55159	-1.58502	-2.19416	-3.46492	-1.96389	-0.787775	-1.09576
cg26710963	1.05354	1.0781	1.25311	1.50898	-3.22734	-6.61751	-1.55905	-11.1018	-1.00572	0.46846	-1.68471	-0.482872	0.687862	0.0761455	1.50875	-9.4856	-0.682216	-1.54967	-1.39401	0.531152	-3.23849	-2.24892	-1.94539	-0.862293	1.41364	-0.246194	0.191627	-0.542879	4.32533	-0.347711	0.686733	1.23176	-0.265338	1.34671	0.546424	-1.39199	-2.42272	2.18291	-13.8814	-3.53342	0.316673	-2.19743	-11.5205	1.74455	-3.17208	0.0452149	0.773091	-0.753439	-0.364757
cg09916765	-0.33797	1.30626	0.07788	1.11073	-0.886114	-2.53508	-1.10891	-4.70575	-0.354858	1.24115	0.387026	0.988992	1.99071	0.74284	2.54677	-4.0917	-0.629227	0.309569	-0.24705	2.31213	-1.9608	-0.533456	-1.63732	0.180609	1.89039	1.18884	0.795048	0.234803	7.17763	1.05581	-1.42618	-0.316013	0.853869	0.827703	1.6851	-0.821709	0.178194	3.33395	-6.15552	-1.8161	1.70805	-0.634174	-3.97619	3.49711	-2.45395	-0.192396	2.246	1.49162	1.19821
cg06781532	-2.64805	-0.0282015	-0.384369	-2.05621	-0.0203699	-3.52986	-0.335537	0.351887	2.48336	-0.524142	-0.661848	-1.72725	-0.85066	-1.80308	0.253188	-1.54777	-4.74185	-1.23854	0.0680271	0.550783	-0.92169	1.86631	-0.697926	-1.14856	0.332853	0.362616	0.166592	-1.83648	5.30684	-2.42429	-0.472299	-0.773336	1.42503	-0.171597	0.369373	-4.64766	-0.421581	2.07266	-3.27836	0.736267	1.54798	-1.61907	1.59205	1.76343	-1.01568	-2.35525	-3.47108	1.11981	-0.832974
cg18152773	0.679335	0.273179	0.12572	-0.0755069	-2.6244	-5.05952	-0.636869	-1.17679	-0.420631	0.286317	-3.22409	0.394811	0.430321	0.146127	0.57843	0.180882	-1.27242	-0.350641	0.0669116	0.643991	-0.257255	-0.973032	-5.42048	-4.67053	0.178924	-0.0266051	0.249499	-4.3217	2.14249	0.372506	0.945881	0.319394	-0.0315354	0.13697	0.944316	-5.08841	-0.885514	0.524644	-4.46066	-1.18197	0.281972	-0.173168	0.440643	0.46667	-0.399115	-0.806775	0.0208917	0.0354269	0.139582
cg05871614	0.155441	0.876653	0.00272169	-1.08182	-1.95483	-3.64223	-0.64437	-2.05914	-0.356716	0.136641	-3.43821	0.390904	0.76029	-0.241118	0.347993	0.0645199	-0.729279	-0.159479	-0.809757	0.371295	0.0751196	-1.23489	-5.30449	-5.47141	0.283381	0.0447472	-0.210122	-4.76009	0.481839	-1.24721	0.568478	-0.142056	1.33862	0.826336	0.683903	-4.68768	-0.980252	1.36004	-4.69331	-4.4863	0.93064	-0.0675262	1.06433	-0.705384	-1.1288	-0.879385	1.02449	-0.225811	0.012993
cg22083753	0.314711	0.603901	0.0722823	0.207658	-2.42429	-5.07128	-0.664982	-1.5356	-0.444039	0.0550953	-3.40949	0.10692	0.411022	0.21913	0.189168	0.123104	-1.74548	-0.294893	-0.209992	0.446806	0.20552	-1.242	-5.49901	-5.09813	0.560936	-0.127749	0.603229	-4.6506	0.665009	0.801898	0.800246	0.931082	0.201194	0.170372	0.99138	-5.13902	-0.98768	0.482906	-4.59494	-1.29058	0.176526	-0.388298	0.442044	0.760153	-0.411627	-1.07919	0.19386	-0.231835	0.475636
cg15284719	0.00104703	0.341912	0.187333	0.0706038	-2.72836	-3.70805	-0.543294	-1.26378	-0.170968	-0.115284	-2.47016	0.329974	0.467777	0.0989145	0.0322071	0.166746	-1.75278	-0.134869	-0.25442	0.426802	-0.12765	-1.32535	-4.45854	-4.44937	-0.0160089	0.30654	0.541076	-4.2575	0.555116	0.515188	0.826788	0.118715	-0.213658	0.384784	0.485766	-4.57608	-0.955977	0.401831	-4.04118	-2.04568	0.115056	-0.308876	0.76148	-0.481792	-0.558586	-1.55941	0.117602	-0.104994	0.624168
cg08686092	-0.490456	0.938782	-0.583576	-1.2134	-2.69798	-3.73133	-0.877266	-2.22976	-0.475823	-0.136139	-3.3343	0.401653	1.08506	0.0193407	0.17538	0.0139472	-0.987103	-0.0814107	-0.549308	0.778702	0.0229627	-1.44153	-4.80193	-4.60129	-0.0272977	-0.12628	-0.0635836	-4.31184	3.72418	-1.82344	0.411582	-0.117184	1.65397	0.980833	0.356778	-4.32699	-0.722409	1.06668	-4.33854	-4.46282	1.2065	-0.380672	1.0624	0.242404	-1.63897	-1.10921	0.717003	0.0789621	-0.215319
cg11677105	-0.76975	1.60754	1.30598	-2.07713	-2.07379	-2.55272	-1.97693	-1.41895	-1.53284	1.74837	-2.12819	-0.13436	-0.0901075	2.49253	-0.405775	1.43085	-2.4482	-1.56944	-2.06335	-0.655843	1.38736	-1.07205	-2.55199	-2.42632	1.45435	-0.936271	-0.647629	-2.44253	0.502561	2.04867	-0.254691	0.858504	0.268714	0.142908	-1.96581	-2.38691	1.23755	-0.351505	-2.28189	-1.00937	-0.520602	0.381489	0.797041	0.695347	2.17795	-2.39896	-0.600533	1.2955	0.232314
[truncated: 93 more columns]

## Sheet: bVals_gDMRs 2SD
Table S3: Z-scores for the probes located within the DMRs reported in Tayama et al. (2014) are shown. Probes with hypermethylation greater than +3 SD are highlighted in red, while those with hypomethylation below -3 SD are highlighted in blue.
	Patient 70	Patient 71	Patient 72	Patient 1	Patient 73	Patient 74	Patient 2	Patient 75	Patient 3	Patient 4	Patient 5	Patient 6	Patient 7	Patient 8	Patient 9	Patient 76	Patient 10	Patient 11	Patient 12	Patient 13	Patient 14	Patient 77	Patient 15	Patient 78	Patient 16	Patient 17	Patient 18	Patient 19	Patient 20	Patient 21	Patient 22	Patient 23	Patient 24	Patient 25	Patient 26	Patient 79	Patient 27	Patient 80	Patient 81	Patient 29	Patient 30	Patient 31	Patient 82	Patient 32	Patient 33	Patient 34	Patient 35	Patient 36	Patient 37
cg10243676	0.116207	1.00932	0.195648	1.53054	-2.7003	-3.75734	-0.228223	-3.37538	-2.01601	-0.200955	0.206955	0.634979	-0.384129	-0.332659	1.56755	-2.6481	-0.423153	-1.6924	0.290244	0.123163	-1.08195	-0.1304	-4.3437	1.78637	-0.0404451	-0.549418	-0.623315	-1.58486	0.282899	0.10631	1.44119	0.924462	1.18968	0.151702	-0.323573	-1.10437	-1.26658	-1.64932	-0.694085	3.67184	0.705246	0.298406	-2.92793	2.92179	0.180741	-0.194793	0.733696	-0.317415	2.42738
cg11704876	0.261621	0.74525	0.738274	1.63402	-2.87314	-4.48045	0.452044	-2.80138	-2.83071	0.159837	0.420653	0.456385	-0.389809	-0.134192	1.57414	-1.24157	-0.0591321	-1.35987	1.00271	-0.432941	-0.672094	-0.0885942	-5.5387	3.00852	0.651225	-1.03179	-1.223	-1.31319	-4.32281	0.237342	2.59465	1.36279	2.17214	0.254172	-0.338942	-1.30842	-3.21422	-0.776722	-1.23044	2.84801	0.57899	-0.319577	-3.72197	2.31273	2.68565	-2.18511	0.347821	-0.259115	1.50019
cg22862450	-0.538362	1.52696	-1.12764	1.0421	-0.613065	-2.15964	1.00054	-3.68484	-2.87087	-1.37582	0.852497	-0.946047	-0.783788	-1.20469	1.4818	-2.48131	-1.09936	-0.529406	0.190873	-0.203158	-0.682868	-0.0308677	-7.59945	1.06376	0.536255	-1.4829	-1.04052	-1.27919	-6.69735	-0.652743	1.74776	0.0605201	1.93513	-0.881671	0.0288943	-1.25745	0.66081	-0.859535	-1.12919	1.5324	1.25675	0.191532	-3.5588	2.16927	-0.643257	1.73835	0.879628	-0.264023	1.06193
cg15057250	-0.224653	1.39572	-0.281321	2.06501	-2.36248	-3.22896	-0.612557	-4.06046	-3.73898	-0.879397	0.171581	0.303276	-0.42507	-0.995056	0.466761	-3.05817	-2.26257	-1.71817	0.780703	-1.21711	-1.04089	-0.2883	-7.94518	1.97061	0.726863	-1.14905	-1.34733	-1.47687	-7.21225	-0.393147	2.38115	0.489613	1.29576	0.461238	-1.71923	-0.888422	0.708957	-1.46916	-1.77539	1.64834	0.402676	0.432243	-5.19004	1.89676	-0.671444	1.12392	0.948932	-0.183497	1.36162
cg03641225	2.23872	-0.372548	-0.601544	-0.478402	-2.47004	-3.69862	0.28018	-0.812988	-1.59198	0.0134445	-0.97859	0.773012	0.404189	-0.869681	0.245191	-0.429139	-2.41948	-1.31191	-1.26988	1.05203	-3.07766	-1.02955	-0.193058	-3.12779	-0.169576	0.825541	-0.556213	-1.22201	-3.94646	1.58238	1.17955	0.312509	0.330966	0.140463	0.244407	-2.555	-0.19614	0.0607827	-1.47089	-4.32494	-0.395697	-2.08186	-2.76761	-1.11872	-0.538151	0.45767	0.787626	-0.765227	0.244224
cg24871743	4.87464	0.0274013	-0.760916	3.96292	-1.32246	-2.41447	-0.787636	-1.12061	-3.24279	-1.21193	-0.657547	0.976442	-0.535129	-1.20253	0.386996	-1.06554	-0.862711	-2.63356	-0.437854	0.565451	-4.73385	-1.07151	1.3641	-5.5484	0.286067	-1.51195	-0.94754	-0.341755	0.415153	-0.810377	1.53214	0.0701154	1.35718	0.417038	1.03512	-5.04438	1.80415	2.17369	-3.3888	-1.39803	-1.25865	-1.10386	-2.33945	-2.00496	-0.314963	2.33904	-1.0247	-1.99787	-0.210776
cg22901840	3.83343	0.48382	-0.383411	3.3062	-2.23642	-1.79616	-1.28227	-1.99172	-1.86791	-0.506873	-1.16803	0.0796419	0.266483	-0.499204	0.405206	-0.129425	-1.16071	-1.29963	-1.02051	1.2361	-4.78499	-1.57195	0.364911	-4.44427	0.240459	-0.126121	-0.822027	-0.556986	3.32666	0.0564394	1.32187	0.407833	0.655725	0.441354	0.513749	-4.20065	1.41869	0.76069	-3.20922	1.47826	0.282989	-0.780668	-2.4837	-1.69682	-1.11607	1.39807	-0.261585	-1.70419	0.252444
cg20149168	4.43614	0.212545	-0.807891	2.97354	-1.11991	-2.64932	-1.81859	-2.56241	-3.44616	-0.90757	-1.67561	1.05577	-0.500553	-0.485641	0.631943	-0.773169	-0.00241026	-1.44374	-1.31855	0.667066	-5.91833	-1.23512	0.296013	-4.78949	0.0831646	0.200592	-1.71597	0.145312	1.94507	-0.5721	0.884124	0.45071	1.70265	0.929638	0.203297	-3.83278	2.30398	0.0545816	-2.86485	0.288692	-0.413314	-1.45154	-3.34098	-3.47877	-1.33517	1.07645	0.0975703	-2.1235	-0.804069
cg13697378	5.1941	-0.562539	0.19661	4.07903	-6.98406	-3.66377	-1.61713	-3.37661	-3.68086	1.09586	-2.20793	1.4646	1.01753	-0.596714	-0.164007	-1.4324	-2.5958	-0.783579	-0.808569	1.63413	-8.39802	-1.8735	0.472789	-10.2098	-0.553242	0.744502	-1.37775	-0.408694	-7.2711	-0.866714	2.18223	-0.342123	-0.0833581	-0.336555	-0.0238612	-7.20244	1.1141	-1.50665	-3.62245	-0.611905	0.642908	-3.17177	-9.56054	-3.84204	-0.615444	0.698312	0.624266	-2.01159	1.13668
cg00448707	4.75703	-1.05966	0.173388	2.33582	-3.85704	-3.15851	-1.02281	-2.42633	-3.66929	-0.15402	-1.94798	0.340057	0.483001	-0.812585	0.38226	-0.893726	-2.33958	-0.258036	-1.21609	0.936503	-6.5229	-1.04398	0.834266	-6.69348	-0.313631	-0.527899	-1.27992	-1.51084	-3.28204	-0.52126	1.15803	-0.0781447	0.634707	1.17843	-0.903478	-5.38602	0.783345	-1.20855	-3.55264	-1.98862	-0.948941	-1.59026	-5.33708	-4.44257	-2.02481	1.83333	0.132173	-2.09563	0.00632859
cg09118625	5.33317	-0.00879238	-1.0055	4.82478	-3.61039	-4.00203	-1.5447	-2.22949	-3.49442	-0.208779	-1.67752	2.44212	-0.170303	-0.412458	-0.141607	-0.202537	-1.47712	-0.890208	-1.42636	1.95771	-7.42802	-1.89569	1.36306	-6.90979	0.50781	0.457583	-1.27385	0.125677	4.03848	0.478166	1.13035	-0.0569003	0.0257692	1.21201	1.11807	-6.70798	2.64381	-0.492549	-4.60624	1.70876	0.451683	-2.27307	-5.70058	-3.02707	-0.206882	-0.0597213	0.183591	-1.5326	-0.150802
cg21808053	2.56483	-0.41948	-1.20021	1.47156	-3.96396	-2.17551	-1.46777	-1.31759	-3.14295	-0.134684	-0.545241	0.0995334	0.303963	-1.66084	-0.340618	-0.256835	-1.34195	-1.48752	-2.00728	0.184702	-4.76912	-1.36159	-0.066173	-4.90195	-0.30911	0.822046	0.426502	-1.05759	-6.0828	0.0950332	0.618321	-0.246267	1.32772	-0.362053	-0.425717	-4.52716	2.0061	0.101844	-2.62908	-3.63848	0.702342	-1.62117	-4.22046	-2.91179	-0.73743	3.21814	0.112171	-1.7205	0.843975
cg02317907	0.152029	-0.15762	-1.90858	-1.98396	-3.19533	1.63079	0.836987	-5.88772	-2.05498	-0.648365	-2.03727	-3.00084	-2.18596	-0.772979	0.941088	0.255461	-0.122519	-1.56287	-2.58571	0.0672325	-1.14011	-1.60276	-0.15558	-0.940941	-1.9277	-1.46668	-1.48461	-0.748075	2.1779	-1.84803	-1.15948	0.647218	-0.0286118	0.917206	2.50536	-1.48859	1.34539	1.57531	-2.02324	-1.78651	0.408625	0.975269	-7.67126	-0.623112	-1.12098	-1.36544	-0.622811	-2.63031	0.880126
cg17943391	-0.803347	-0.366971	-2.09819	-2.63416	-7.62343	-1.87723	-1.01043	-11.0678	-0.431354	-1.13081	-1.66496	-0.947569	0.19271	0.996292	-0.892478	0.0697638	-2.00744	-0.931913	-1.49744	0.793414	-2.03241	-2.14176	0.00217047	-1.34486	-1.28949	0.490061	1.60558	-0.694426	2.82749	1.08294	-0.436532	-0.815777	0.970619	-0.613357	0.867689	-1.01899	-2.68778	0.900225	-3.80241	-1.94381	-0.204723	-0.059353	-11.1035	-0.72207	-1.7431	-0.025479	-0.257733	-0.0384994	0.697004
cg19114595	-2.01517	0.683383	-1.5568	-3.2945	-0.600012	1.96844	0.907737	-4.86695	-0.957117	-0.341455	0.718492	-2.13622	1.25473	0.204255	1.13058	2.38435	-1.67514	-0.530414	-2.57153	1.48058	-2.03708	-1.65631	-0.939324	0.654241	-2.24037	-0.757091	-0.812392	-1.62814	5.52969	0.717106	-0.980672	0.0507831	1.44252	-0.609311	-0.107871	-0.372067	-0.295876	0.73909	-1.88995	-1.62882	0.925867	-0.598302	-2.8198	1.63697	-2.49866	0.135045	0.51063	-0.143568	1.30311
cg12070746	-0.151138	0.148496	-0.734173	-1.02248	-5.02654	-1.67903	-1.0702	-7.12409	-0.154693	-0.938238	-1.60471	0.0396779	0.134896	-0.149593	-0.687939	-0.442745	-1.0111	-0.539442	-0.0888624	0.493185	-1.99467	-0.97078	-1.28998	-1.36011	-1.11639	0.380608	0.277242	-0.668495	5.09544	0.558432	0.0870652	-0.0848825	1.00106	-0.311442	-0.0628785	-0.905284	-1.2233	0.975099	-2.41637	-2.96531	-0.202021	0.115566	-7.28724	-1.19307	-2.25571	0.852832	0.0875264	-0.0156222	0.0235427
cg16314899	-1.26106	-0.105865	0.788325	0.908576	-4.85682	0.692218	-1.04915	-6.6898	-1.37276	-0.955493	-1.97203	-0.173402	-0.05593	-0.275267	1.181	-0.0747064	0.468033	-0.933914	-1.68514	0.341718	-2.51206	-1.59749	-0.548164	-1.76206	-0.917242	0.399982	-0.0863769	-0.459041	3.03159	1.15558	0.884878	-0.63188	1.46047	0.180716	0.500117	-1.08656	-0.376534	0.017145	-2.76833	-0.126655	0.0740211	-3.29367	-7.2414	0.410916	-0.250585	-2.20207	1.0442	-0.557816	0.0793341
cg25755905	-0.534644	0.116473	-0.755569	-1.60403	-4.54371	-1.20053	-1.45172	-5.919	0.0196621	-0.428785	-1.23665	-0.281447	0.198989	0.0099604	-0.0984526	0.0581625	-1.10283	-1.41977	-0.59348	0.311644	-1.77014	-1.66259	-0.865424	-1.18894	-1.23272	0.0775516	0.212891	-0.754412	4.36689	0.259533	0.138011	0.207515	1.57167	-0.181384	0.194952	-0.851054	-1.17179	1.34582	-2.17453	-3.15653	-0.366143	-0.83441	-6.7738	-1.21327	-2.41642	1.08962	0.31581	0.0621505	0.267258
cg22500004	-0.926478	-0.16743	-1.76486	-1.69166	-6.26312	-2.0027	-2.18985	-9.23533	-0.722002	-1.16297	-2.32336	-0.154616	-0.727594	-0.276122	-0.383322	-0.271191	-1.93419	-2.50979	-1.26345	-0.015193	-3.57746	-1.01578	-0.540401	-1.20285	-1.11747	-0.864817	-0.149345	-0.853799	4.02764	-0.037721	-0.347431	-0.132917	1.23542	-0.309339	-0.82393	-0.663752	-1.82721	0.851409	-3.29327	-3.76344	0.654239	-0.00263655	-9.56889	-2.15125	-3.3902	-0.119339	-0.12804	0.376767	-0.346439
cg05949203	-0.0289796	0.443975	0.00454705	0.13641	-7.47737	0.327085	-1.61314	-10.21	-1.05326	-1.27315	-2.74996	0.599174	0.0577802	-0.382065	0.625538	0.431149	-0.708301	-0.82482	-1.3249	0.0177158	-2.65702	-1.27044	-2.452	-0.254747	-1.14057	-1.30784	-0.231922	-0.0903897	-1.285	0.475439	0.313625	-2.17696	0.910537	1.05377	0.989574	-1.07327	-1.59869	0.125828	-3.37	-1.85867	1.8149	-2.29597	-11.1945	-0.677307	-1.86462	-0.525936	0.189249	-1.23977	0.579791
cg19694923	0.711136	0.263169	-0.370304	-1.11657	-6.02641	-2.06132	-1.00019	-7.43798	-0.205958	0.10012	-1.21873	0.336336	0.233385	0.0349449	0.740878	-0.0548769	-1.10073	-0.402163	0.901056	0.662268	-1.87138	-1.16387	-0.540985	-0.878564	-0.7829	-0.220583	0.360576	0.213954	3.3462	1.23094	0.607149	-0.755539	2.15573	-0.609007	0.799886	-0.781198	-1.8111	0.799457	-1.66176	-2.5044	0.402476	0.466371	-8.01816	-1.5265	-2.54397	0.824991	0.239995	0.389849	0.278404
cg05392265	0.151805	0.0146954	-0.695395	-0.912788	-3.76416	-1.45227	-0.94854	-5.24447	-0.311986	0.0543029	-1.20902	-0.554272	0.0996267	-0.395144	0.532371	-0.261516	-2.23589	-1.25451	-0.75794	0.08405	-1.83222	-1.64925	-0.648522	-0.363809	-0.274342	-0.21276	-0.202089	-0.30975	2.81124	0.369496	0.070157	-0.219404	1.48089	0.0857315	-0.0935391	-1.18238	-1.22804	0.805971	-1.5325	-2.25969	0.0476322	0.217508	-5.06597	-0.90489	-3.3244	1.59656	-0.619053	-0.247954	-1.90208
cg06191076	-0.525978	0.297748	-1.01899	-0.696655	-5.77643	-2.15115	-0.452795	-6.76851	-0.406918	-0.144462	-1.55527	-0.65161	-0.388478	0.0769156	0.0744685	-0.402834	-1.67077	-0.792253	1.02018	0.302391	-2.18833	-1.64559	-1.11328	-0.150566	-1.65415	-0.13395	-0.822069	0.0391734	2.80718	-0.0765915	0.407993	-0.507865	0.93824	0.265663	0.206316	-1.83507	-0.583119	1.01458	-1.82455	-2.25538	-0.351013	-0.21745	-6.49696	-1.06183	-4.8199	1.36146	-0.662646	-0.394751	-2.8868
cg16148270	-1.52718	1.06089	-0.270423	1.10068	-9.25123	2.61815	-1.54983	-12.4611	-1.13117	-0.170122	-3.65872	1.13824	4.93837	-0.0140651	0.280368	1.02959	0.457061	-0.377944	-1.12719	0.566108	-3.14573	-1.25837	-1.9854	-2.09673	0.149821	0.729224	1.97853	0.97526	-1.33618	0.370086	-0.705452	-1.57656	0.246968	3.65829	1.75947	-0.336231	-0.164363	-0.654152	-4.35484	0.494628	1.17171	-2.41028	-15.038	2.0333	-1.12584	0.919305	-1.03426	-1.87263	0.416282
cg13208159	-0.633698	-0.427377	-1.08639	-0.952754	-3.65581	0.190755	-1.67527	-4.6817	0.0902987	-0.610084	-1.60933	-0.0492938	-0.648697	-0.69419	-0.168708	-0.992784	-1.10715	-1.48635	-0.882292	-0.320547	-2.25139	-1.51737	-1.40632	-0.753363	-0.387025	-0.892308	-0.853338	-0.966245	0.244025	0.687235	-0.117437	0.0349276	2.09751	-0.0902262	-0.457954	-1.15495	-3.16217	1.0532	-2.22266	-1.16068	-0.713877	-0.463587	-4.54938	-0.239597	-2.517	1.65918	-0.788282	-0.855972	-1.06723
cg13099417	-1.88981	-1.1612	-0.827128	-1.54795	-3.17581	-3.10589	-2.29994	-1.74018	-0.434858	0.297594	-0.539477	-1.86264	-0.568261	-0.542673	-0.358045	-0.990916	-1.41923	-2.62275	-3.12779	0.970064	-0.47602	-0.0141797	1.50923	0.809781	-1.83818	-2.04061	0.90535	0.498023	-2.89237	-1.09016	-0.309785	-0.773021	0.675675	1.3764	-1.86058	-1.15893	-2.29619	-0.600601	-0.530026	0.0405766	0.806287	-0.664288	-2.51554	-2.2428	-4.17412	1.78859	-0.983618	-1.2295	-2.00739
cg27545611	1.10519	1.70618	-0.507329	0.369533	-6.28046	-5.36231	0.437533	-7.52326	-1.91641	-1.98281	-5.04489	1.18732	-1.14928	0.424702	0.132882	-2.9259	-1.50205	-0.470705	0.503315	0.517761	-3.06997	-1.69982	-0.656531	-3.28464	-1.56697	0.212907	0.341732	-1.19342	1.83507	0.31108	-0.294744	-1.24645	1.00269	1.44028	1.00886	-1.03462	-0.79644	-1.44214	-3.12945	-1.36015	-0.796499	-4.56441	-8.85195	-2.20578	-1.50504	-1.25105	-1.18137	-3.271	-2.45693
cg16148134	-0.913776	1.28749	-1.1993	-2.78669	-4.72383	-4.43674	-0.475571	-5.61958	-3.12606	-2.55707	-1.9051	0.412149	0.683744	-1.43964	1.34873	-1.43773	-0.813017	0.110031	-0.316024	0.695449	-5.18085	-2.83942	0.0757466	-4.12114	0.0447227	-0.202196	-0.0242523	-1.96645	-2.03563	-3.17763	1.072	-1.93606	0.897578	-0.0454211	0.0333118	-2.5606	-2.12742	-1.78706	-2.60704	-1.04227	1.18267	-2.45805	-5.77663	-1.66591	-2.45439	-0.49264	0.933289	-0.395485	-0.686522
cg13605615	0.966895	0.644938	-0.237787	-2.58136	-5.33522	-5.22483	-0.687555	-8.19931	-2.80346	-3.02287	-1.3825	1.64113	0.397114	-2.43459	0.599667	-0.997057	-1.68041	-1.08998	-1.33946	1.98713	-5.85759	-2.73308	-2.64782	-2.74977	0.131098	-0.301781	-0.731616	-1.41555	-6.70282	-1.91385	1.13879	-1.86619	0.565107	-0.397814	0.728007	-2.9215	-1.46876	-1.29853	-2.22962	-0.244314	0.408605	-3.66132	-8.15074	-1.49687	-3.83496	-0.520081	0.559101	-0.825872	-1.78122
cg10038185	1.60593	-0.145481	-0.479713	-0.958317	-4.21255	-4.68702	0.800265	-6.22044	-1.04736	-0.45946	-2.22246	1.63281	0.594648	-0.7005	0.627639	-0.626455	0.925022	-0.269253	-0.0129619	1.23084	-5.8906	-2.11656	-2.74251	-3.55193	0.546033	0.41882	0.285897	-0.956347	-4.92408	0.853754	0.422353	-1.1527	0.930621	-0.437356	-0.238452	-2.66827	2.28223	-1.32942	-1.85884	-0.667817	1.45944	-1.0731	-7.04009	-1.70128	-0.825598	-0.145897	0.252259	-0.410576	-0.754545
cg19696983	1.56544	1.31086	-1.01881	0.71828	-0.890859	-1.38911	0.88062	-0.158019	-0.131417	0.991449	0.595907	0.898851	-0.371699	0.986982	1.43833	0.391754	0.247779	0.940717	-1.07819	0.97851	-1.23721	1.08916	0.574615	0.293	0.417232	0.195481	-0.717904	0.0361789	0.170434	-0.914317	0.379564	-1.75839	-0.753932	-0.32376	-0.991645	0.69683	-0.811355	0.402031	0.746478	-0.54379	1.52476	0.835963	0.666578	0.152445	0.678273	-5.30287	-1.09643	0.51126	0.415845
cg23239484	0.385865	1.66514	1.83871	-0.947114	-0.452755	0.910086	0.289714	1.3702	0.241403	0.684673	1.60049	0.663183	0.992811	1.95807	1.39957	0.421638	0.136335	1.10259	-0.916342	0.931247	1.87157	-1.36302	0.521229	0.860638	0.635741	1.47871	1.49044	1.71184	0.682396	-0.681927	0.687576	0.325747	-0.274152	1.44489	1.20353	-0.145919	-1.08897	0.339092	0.732894	-3.17407	1.04302	0.279716	0.32219	-0.897435	-1.43137	-0.852387	0.62123	0.870182	0.287182
cg13443116	0.278929	0.815158	-0.076156	-0.583088	0.470918	-0.0824436	1.39865	0.526905	0.0535322	0.123015	0.767217	1.19219	0.392187	0.780636	0.813569	1.06263	0.833606	0.150143	0.170274	0.621393	0.606131	0.492659	0.041479	0.739585	-1.97172	-1.32217	0.586173	-0.0903562	0.577574	0.700351	-0.492331	-0.121702	-0.112607	0.781664	0.363759	0.292994	-2.05738	-0.962601	-0.231507	0.754524	0.287976	0.483277	0.506588	0.707017	-2.71925	-4.96906	0.834629	0.462079	-0.0861084
cg25535070	-0.153351	1.42657	-0.567047	1.04939	3.65352	2.4035	-0.0602565	-0.677668	0.097552	0.246561	4.24776	-0.0835778	0.784721	-0.699228	-0.839616	-0.369314	0.632446	-2.87768	0.0434505	0.119459	0.0541645	-1.1068	1.15141	2.23519	1.29494	-1.33136	-1.20509	-1.50329	-0.694653	2.19297	-0.631773	-1.09294	0.455104	-1.14973	-2.08788	-0.233754	-0.349541	0.346171	4.885	0.081089	-1.4782	1.43781	5.44688	2.12642	2.20269	-1.53434	0.369696	0.587529	-0.198535
cg04359324	-3.79829	-0.865866	0.221327	0.337013	2.72673	-1.87307	0.254552	0.796571	-0.820362	-0.942308	3.65377	-0.27986	1.44754	0.727866	0.493783	0.140853	-2.50203	-0.484402	-0.477913	-0.966253	-0.461799	0.0776734	1.15078	0.896263	-1.48541	-2.44685	-0.651315	1.05287	-5.21499	-0.0451755	0.72854	-1.4098	0.305137	-1.30994	0.683121	0.287068	-2.71499	-1.37886	4.01422	-1.38987	0.866083	0.380879	3.18111	-2.18809	-4.31442	-2.8215	0.200604	0.492922	-1.25077
cg20471298	-0.616913	0.690418	-1.56416	0.36614	6.32345	-1.43712	-1.06848	0.837539	-0.0909947	0.345714	6.85508	-0.455633	0.647403	0.493548	0.685614	0.892423	-3.05086	0.207727	-0.966821	-0.0856481	-0.531322	0.00794461	3.02247	5.24427	-0.715714	-0.754675	-0.988544	-0.44234	7.50295	-2.26478	-1.11488	1.1878	-0.179922	1.12245	0.871633	-0.659699	-2.65484	-0.302412	11.3895	-2.3991	0.631116	-2.62929	12.1166	-1.93979	1.77154	-0.277943	-1.08803	-0.120074	-2.19836
cg03428109	-0.668888	-0.236625	0.315447	1.06155	2.75635	-1.77671	-2.15706	-0.14148	-1.64138	-0.142314	3.59587	-1.15286	-0.060219	0.887375	0.22987	-2.04326	-0.088777	-1.92335	-0.232932	-0.608907	-1.32788	0.223191	0.548149	3.34898	-1.59353	-0.13514	-1.045	-0.360857	1.54496	-0.472846	0.189439	-1.66275	0.260912	0.960191	-0.56227	-1.07597	1.52087	0.924616	4.104	2.36186	-0.771763	-1.10427	4.30983	-0.978626	2.25101	0.902269	-2.13464	-2.05559	-1.24831
cg25307915	-0.212991	0.164689	-1.11815	0.593067	4.37488	3.05907	0.572924	0.814967	-0.777488	1.31502	4.76181	-0.23698	-0.278785	-1.44123	0.314919	-0.182856	-0.154294	-0.791668	-2.19507	-0.746949	-0.172099	-2.04187	2.92174	3.98778	-1.58069	-0.152349	-0.3502	-1.03255	-6.46498	0.462479	0.78828	-0.881474	1.01861	0.777008	-0.995627	-1.17492	-0.361584	-0.200043	5.79115	-1.59147	-0.711133	-1.5356	6.052	-0.866127	-1.87022	-3.5079	-0.794146	-0.808698	-1.01219
cg19366042	-0.391963	0.962251	0.378681	-0.327055	3.31799	3.26273	-0.0833885	2.90321	0.672849	2.47645	4.54387	0.5627	-0.585731	-0.885619	-0.786567	0.176335	1.33576	-0.327057	-0.333521	-1.26688	-2.83398	-1.54322	3.10284	0.73687	-2.42818	-1.4388	0.0952753	-0.518958	-1.90188	-0.769272	-0.658577	-1.41239	0.625458	1.40971	0.407749	2.88115	1.16405	-0.140302	4.72741	2.1864	0.0578616	0.467213	4.50918	-0.98041	-0.950233	-0.714996	0.491068	-0.673239	0.100878
cg10583266	-1.72738	0.485789	1.22596	-1.3978	1.66836	-1.64532	1.38583	2.67773	-1.76613	0.237317	3.81331	-0.519045	0.11512	0.9427	-1.48627	-0.113677	-1.10039	-0.0125528	-1.72901	1.35905	1.34733	-0.678861	2.31791	3.23564	-2.69446	-1.00552	-0.942084	1.431	-2.49022	-1.63591	0.8606	-0.672701	-0.141339	-0.680473	0.483647	-1.18151	-1.6622	0.530671	3.91346	-1.97478	0.440132	-1.57857	4.3964	-0.48975	-1.91626	-0.75257	-1.01736	-0.93071	-1.18153
cg18772071	-0.779595	-0.12327	0.237649	-0.57045	-7.29809	-2.47037	-0.24144	1.15445	0.0786904	1.17376	-0.653906	-2.46016	0.659204	0.317816	0.878575	-1.26794	-1.58764	-0.386442	-0.798872	0.662035	0.484445	-0.386574	-0.568293	1.02928	-0.519454	2.12394	0.449623	0.371084	5.2102	-0.585806	0.973221	0.856008	-0.38467	0.266924	0.650742	-8.47645	-2.38278	-2.88842	2.00807	-2.58239	0.309526	-1.44721	-8.25126	-0.229416	-6.3746	-1.80868	0.62954	1.07503	0.76964
cg17635114	-0.883684	1.03006	0.347427	-0.181443	-10.7474	-3.41294	-0.143016	0.834686	-1.52854	0.371258	0.710476	-1.32237	0.945972	0.665818	0.527902	-1.39454	-3.43022	-1.88525	-0.0931465	2.86913	0.925837	-1.96205	0.082089	2.32074	-1.62096	0.0465627	-1.47138	0.417131	2.18676	-4.80402	0.599649	0.915043	-0.0634156	-0.701592	1.71134	-13.1879	-3.84312	-1.23683	0.325892	-6.02147	0.819646	-0.291421	-13.2521	-5.39007	-8.03185	0.683468	-0.177101	-0.278093	-0.596792
cg05065100	-2.72305	0.569968	-0.100434	-1.6763	-4.76819	-3.6731	-1.52951	0.625825	-1.59817	-1.07894	-0.616145	-0.118163	-0.205849	-0.0300131	-0.747831	-1.03917	-2.26547	-1.13067	-2.44801	0.477061	-0.972957	-0.265239	-0.350792	2.04151	0.381399	-0.0155667	0.357292	-0.258274	-6.15924	-2.21513	-0.293554	-0.18244	1.02235	1.23255	-0.197687	-7.05855	-2.81417	0.298587	-0.607585	-3.98495	-1.02586	-2.01563	-7.02566	1.47793	-3.17559	-2.93128	-0.750086	-0.762361	0.176181
cg12759554	-1.10476	0.409465	0.384032	-0.992877	-5.39316	-1.71331	-1.04496	0.464262	-1.24043	-0.782672	-0.0313874	-0.611604	0.218621	-1.1369	-0.604253	0.17949	-2.4182	-2.48693	-2.00294	0.0511754	-0.888655	-2.07044	-0.722962	0.168966	-0.702337	0.0593858	-2.01534	-0.865699	4.32388	-2.08885	-0.089177	-0.0694248	0.374503	0.657028	-0.106915	-6.70812	-1.64987	-0.220088	0.62224	-3.98531	-0.69572	-1.59812	-6.04832	-1.98219	-4.52807	0.674332	-1.56194	-0.703043	-0.501421
cg01578057	-0.399648	-0.0800244	0.20946	-0.64067	-4.95473	-1.51793	-0.655383	0.303332	-1.20674	-0.358313	0.261909	-0.0369817	0.54246	-0.743527	-0.128304	-0.565524	-1.77391	-2.33853	-1.74198	0.386258	-0.331994	-2.15488	-0.907503	1.40349	-0.967571	-0.020674	-1.1568	-0.437965	3.0142	-1.89659	0.94748	0.774969	0.669453	0.498921	0.486893	-5.73276	-1.02285	-0.563999	1.02389	-3.98687	0.392491	-1.05001	-6.25366	-2.16183	-3.66321	1.12857	-0.895294	-0.612943	-0.151514
cg27150681	-1.98233	0.610801	0.110994	-3.2918	-9.36728	-3.19321	0.197009	0.639429	-1.85217	-0.755171	-0.705646	-1.30318	0.0423762	-0.348901	0.993016	-0.645202	-3.95248	-3.41641	-1.99523	-0.690351	-0.286989	0.124708	0.194846	-0.419837	0.348897	-0.660903	0.388104	-0.11669	3.9062	-1.04951	0.22147	0.297249	1.87227	-0.476535	-1.31339	-13.9615	-2.22081	-1.16779	-0.818559	-5.65832	-0.0788766	-2.1078	-13.0866	-2.37035	-2.95692	-2.22839	-1.75889	-1.11538	-0.576689
cg23954636	-0.440887	-0.499348	-0.252048	0.141809	-13.0029	-2.42008	-2.08988	-0.605106	-2.02336	0.802207	-0.713277	-1.45682	0.0305128	1.07156	-1.10767	-1.42834	-3.00777	-2.61284	-0.632993	0.737012	-0.612567	-1.40538	-1.52101	1.12173	0.239651	-1.39243	-0.467444	-0.141201	2.99113	-2.18877	0.327893	-0.403017	-0.415416	-0.149807	-0.11973	-15.4443	-0.521746	-0.882862	0.652819	-4.63385	-0.301897	-1.60521	-14.9939	-0.549637	-2.43616	-0.597754	-2.08648	0.671347	-0.495012
cg01174175	0.80736	0.136531	-0.439914	-0.0875811	-11.7352	-1.55856	0.654703	0.810973	0.612161	2.09156	0.609419	0.312161	0.727914	1.7644	0.93836	-0.551882	-0.292756	-2.65976	-1.72745	0.450372	-0.0522993	-1.6492	-1.92009	2.84196	1.94396	0.197855	-1.19621	-0.270095	-0.925119	-1.02567	1.73152	0.846923	-0.334914	0.658879	0.522706	-16.1478	1.68841	-0.235602	0.89084	-2.82408	-0.663823	-1.58962	-17.209	0.832876	-1.23178	-1.72922	-0.548385	-0.198816	0.454986
cg06617468	-0.369356	0.0156859	-0.512371	1.41142	-11.2099	-0.930161	-0.443978	0.38432	-0.418392	1.95164	-0.170556	0.278175	0.804148	0.889094	-0.385509	-0.438942	-0.789414	-1.6382	0.662662	1.3209	0.802793	-1.14768	-1.41792	4.3234	1.89105	-0.738913	-0.272126	0.110022	-0.477409	-1.75185	0.916326	0.421825	0.325454	-0.860197	0.569003	-16.9586	1.05565	-0.0493282	1.60122	-5.11622	1.57529	-2.05331	-16.1472	-0.76039	-3.78231	0.435327	-0.682697	0.127548	1.27683
cg18607468	-1.32832	0.496795	-0.163931	-3.26653	-5.99064	-2.57192	0.34556	0.0040999	-0.865909	0.7438	0.524433	-0.0408616	0.300476	0.377368	1.95789	-0.664663	-2.88138	-1.83839	-1.81313	0.497409	0.0359565	-0.57248	-2.75223	1.01625	0.193896	-0.485648	-0.0453621	-0.972221	4.48612	-2.3873	0.276867	0.325277	0.223094	0.465372	-0.560801	-9.57761	-2.44251	-1.4626	-0.135133	-6.08972	0.8168	-1.1722	-8.83517	-3.6196	-2.52543	-1.57571	-0.740421	0.147394	-1.02523
cg11300971	-1.22723	-0.0870452	-1.03036	-1.53664	-8.78477	-3.06498	-0.0923787	-0.299111	-1.43077	0.441982	-0.129365	-0.721505	-0.507939	0.27353	3.02295	-1.5445	-3.82002	-1.94093	-0.545115	0.469431	0.264983	-0.0473567	-0.10058	0.707983	0.727583	0.207759	-0.639676	-1.41979	3.89067	-1.57063	0.256253	-0.0970596	0.482689	-0.433052	0.428927	-11.9321	-2.1203	-0.673136	-0.000342947	-6.90966	-0.269343	-1.97984	-11.6059	-1.66732	-2.22373	-1.80751	-1.84945	-1.2786	-0.389654
cg13610072	-0.467304	-0.596549	0.1154	-0.840729	-8.03925	-1.23407	0.916521	-0.555776	-1.32045	0.701368	-0.0307715	-0.106454	0.0443051	1.22302	0.121604	-1.33539	-4.29668	-2.81885	-0.89526	1.56696	0.858183	-1.29826	0.415533	0.625356	1.94383	0.423165	-0.834511	-0.951019	1.41413	-3.0176	1.18065	-0.488727	1.09411	-0.498023	0.233949	-11.5336	-1.59549	0.451058	-1.4274	-6.93082	-0.303047	-2.16039	-11.707	-2.54151	-4.14706	-2.40353	-0.803751	0.0835315	-0.294661
cg07539802	-0.561004	0.517214	0.174622	-1.67038	-3.52368	1.26806	0.596181	0.20168	-0.827112	0.0150098	1.38369	-0.989988	-0.415124	-0.821308	0.679629	0.174132	0.501472	-2.31296	-3.09577	0.0946193	0.520871	-0.372755	-1.48551	-0.2787	-0.476163	-0.613067	0.0977275	-1.09287	-5.44419	-0.246403	-0.54558	-1.53659	0.0310155	0.0591207	0.507596	-3.72867	-2.52508	-0.462916	-0.939658	-1.8595	-0.443641	0.61395	-4.11343	-2.50892	-0.0927436	-1.27647	0.999631	-0.727039	-0.509903
cg11852404	0.942637	0.326617	0.953816	1.05748	-0.370254	0.414114	1.00098	-1.65376	0.741488	-0.434407	0.133991	1.33048	0.223976	1.36355	-2.02549	-0.420931	1.22595	0.927282	0.82656	0.405651	-0.87359	-1.60755	0.311235	0.181789	0.70215	0.659681	-1.08166	0.295265	-0.783335	1.74551	0.501282	-1.98364	1.01788	-0.0778498	0.778693	-0.000663936	-0.621317	-0.0177518	-1.64743	0.0728141	-0.121986	-0.397721	-0.0907385	-1.73285	0.655281	0.367074	0.719493	0.344299	-1.24286
cg16684184	2.38788	1.09812	0.789006	1.91008	0.366734	-1.75441	0.511217	-1.48093	-0.30374	0.447355	0.0588423	0.988679	0.0400453	1.75499	-1.41556	-1.10429	1.9747	-2.09898	-0.873455	0.214388	-0.639846	-0.739363	1.03028	-0.000175168	-1.19707	-0.401355	-2.71404	1.09954	-0.3333	2.21824	1.95163	-1.25844	0.643623	0.648429	-0.000439613	-0.624113	-0.872509	0.0604994	-1.67081	2.312	-1.29139	-0.26335	-0.524884	-0.898125	-0.606691	1.96338	-1.30119	-0.889287	-2.1679
cg00308130	0.957729	0.967164	1.00682	1.00271	-0.251434	-1.44558	0.568598	-1.30791	0.742257	-0.542379	-0.920901	0.608024	0.904919	1.37859	-1.66984	-0.240165	1.11213	0.981432	-0.12819	0.708941	0.129159	-0.845095	-0.355893	-0.909812	0.455671	0.391439	-1.60826	0.531265	-0.120599	1.49508	0.948684	-1.10458	0.266218	0.504943	0.809066	-0.234477	-0.316064	0.402407	-1.3193	1.65021	-0.346994	0.242209	-0.32267	-1.46952	0.221518	-0.939709	0.777356	-0.0310095	-1.54062
cg15837280	0.973482	0.827115	0.871535	0.225039	-0.862007	-1.53371	-0.550956	-1.16826	0.860501	-1.08523	-0.957992	0.750668	1.40877	1.33221	-1.41474	-0.201327	1.21113	1.18749	-0.824322	1.08768	-0.80898	-1.1497	-0.964783	-1.06839	0.284573	0.60842	-1.45291	-0.244604	-0.190329	2.13186	0.744715	-1.01085	-0.07798	0.838743	1.0859	0.201599	-1.11282	-0.0855305	-1.35618	1.34849	-1.15876	0.430026	-0.898463	-1.55537	-0.869909	-0.636821	1.55669	0.140965	-1.61224
cg07158503	0.551647	0.623397	0.129762	0.546718	0.589585	-1.45555	1.03243	0.123841	0.523397	-0.641971	0.811151	0.662971	0.671618	0.849599	-1.58876	0.745389	0.442094	0.283072	0.62083	0.90034	0.599677	-0.998813	0.244903	0.609351	0.858408	0.65362	-1.64879	0.513139	-0.715653	1.31428	0.466399	-1.68198	0.899307	0.862129	0.498558	0.40859	-1.64932	0.923018	-1.00882	-0.447445	0.675387	0.666344	0.748406	-1.65195	0.743386	0.64869	0.0438382	0.474095	-1.41278
cg04515200	-0.288032	0.316967	1.81713	0.410696	-0.179622	-1.47511	0.0701296	1.11664	0.309506	-0.624266	1.46164	0.30074	1.24385	0.547412	-1.10361	0.0343554	-0.183295	0.168162	0.408778	0.62858	0.61399	-1.35281	-0.0973147	1.16645	0.817525	0.0802455	-1.70482	0.861666	-1.48756	-0.197247	0.983033	-1.23337	1.48089	-0.0526496	0.336336	0.629662	-1.58802	1.3724	-1.04164	1.11311	0.572083	-0.460055	0.998636	-1.68329	-0.540248	0.412214	-0.96219	-0.409816	-1.74211
cg13581155	0.880381	0.889738	1.38697	0.18942	-0.725742	-1.30129	-0.500688	0.281014	-0.810557	-0.95478	0.843086	0.712881	2.09036	0.813055	-1.22945	0.760457	-0.694308	0.0785605	-0.837758	0.896159	0.226194	-0.793111	0.122471	2.16844	-0.26976	-0.386245	-1.459	1.00759	-0.683327	0.316102	0.296743	-1.39989	0.769203	0.474429	-0.0319183	0.260935	-0.843551	0.510633	-1.28572	-0.853785	0.231159	-0.377284	1.31738	-1.07111	-0.320776	0.413426	-0.86965	-0.32721	-1.25454
cg11608150	0.767627	0.73425	0.109251	0.551209	-0.541621	-1.48244	1.00118	-0.0707694	0.856786	-0.788497	0.645575	0.966821	0.75424	1.06456	-1.55842	0.990675	0.851836	0.379259	0.644858	1.13834	0.587115	-1.20186	0.656852	0.851401	0.855267	0.710059	-1.54027	0.701866	2.46721	1.52654	1.08591	-1.57765	1.23298	0.610416	0.673319	0.391172	-1.52687	0.646467	-1.51401	0.321769	0.254335	0.956474	1.06132	-1.49652	-0.169489	0.617509	0.115379	0.644139	-1.53352
cg06478886	-0.06327	0.562001	0.490837	0.215805	0.362167	-1.1497	0.689938	0.22409	0.672016	-0.877346	0.552984	0.923159	0.890985	0.638591	-1.82047	1.02627	0.799564	0.181231	0.246987	0.727226	0.570869	-1.34282	0.290569	0.931444	0.332709	0.522088	-1.48385	0.557803	2.40656	1.69601	1.19537	-1.95891	1.1882	0.753657	0.525491	0.349666	-0.844816	0.820257	-1.72452	-0.488813	1.24695	0.470472	0.837175	-1.68192	0.117658	0.0743232	-0.136905	0.528899	-1.82889
cg04481923	0.319908	0.618598	0.453733	-0.0386936	-0.0532428	-1.313	0.637339	-0.64672	0.465356	-1.13165	0.446035	0.97806	0.487456	0.851201	-1.46896	0.663401	0.674989	0.0653784	0.298188	0.702966	-0.133412	-1.13774	0.333552	-0.420148	0.451116	0.403907	-1.5343	0.280296	-1.29709	0.821881	0.468676	-1.42546	0.960746	0.625869	0.4592	0.1732	-1.57107	0.776013	-1.49699	0.714124	0.454216	0.190914	1.0252	-1.51957	0.449242	-0.0729296	0.448059	0.556049	-1.53853
cg18678645	0.593028	0.682839	0.632687	0.628142	-0.0051759	-1.53205	0.966492	-1.07636	0.775657	-0.939743	0.34385	0.583455	0.327375	0.933726	-1.49601	0.667128	0.605789	0.358863	0.671056	1.03876	-0.101704	-1.36068	0.377252	-0.160441	0.322937	0.406479	-1.48056	-0.0264076	-1.25146	1.39629	0.79366	-1.53899	0.76999	0.310488	0.575187	0.0480472	-1.45734	1.13641	-1.53826	0.612355	0.471209	0.205595	0.926248	-1.43254	0.844882	0.23501	0.178374	0.337242	-1.448
cg06536614	0.766929	0.602929	0.648511	0.762441	0.402055	-0.562314	0.644553	-0.459984	0.57565	-0.30924	0.544952	0.677383	0.744163	0.631407	-1.77845	0.634555	0.394459	0.710209	0.536286	0.700029	0.39336	-0.920675	0.432328	0.3659	0.63065	0.566595	-1.78371	0.345754	0.484341	0.765426	0.936659	-1.76487	0.629818	0.548719	0.671012	0.587857	-1.6993	0.596207	-1.77989	0.381946	0.56734	0.383531	0.656836	-1.72432	0.665751	0.555662	0.55668	0.486226	-1.77246
cg26328633	0.648553	0.718722	0.674877	0.629656	0.326267	-0.994127	0.860022	-0.652465	0.56885	-0.551494	0.397102	0.675395	0.606461	0.842754	-1.66985	0.623204	0.125543	0.861724	0.651595	0.703526	0.386284	-1.11809	0.461168	0.336992	0.683317	0.620361	-1.66175	0.261466	0.629487	0.870645	0.838379	-1.64599	0.456082	0.600987	0.601153	0.599369	-1.63775	0.479676	-1.66041	0.284902	0.642498	0.318999	0.800511	-1.65781	0.524565	0.386612	0.544263	0.503729	-1.59399
cg25340688	0.622828	0.524384	0.683512	0.342602	0.299804	-0.955635	0.61102	-0.754223	0.440056	-0.504135	0.463679	0.752463	0.773392	0.56979	-1.64442	0.598641	0.0763882	0.567086	0.535408	0.537679	0.222673	-1.07716	0.253774	0.198648	0.60444	0.63719	-1.64598	0.239021	0.591032	0.730655	0.774525	-1.66001	0.519493	0.639108	0.447633	0.408594	-1.65589	0.5758	-1.6378	0.118366	0.776301	0.523804	0.743763	-1.6599	0.673341	0.347955	0.535358	0.41891	-1.63682
cg26896946	0.601593	0.742673	0.877438	0.722179	0.388614	-0.969726	0.615926	-0.619362	0.486194	-0.551574	0.435894	0.747223	0.752942	0.614571	-1.67168	0.552418	0.138292	0.609527	0.599357	0.68391	0.289627	-0.974789	0.529465	0.192124	0.596801	0.565057	-1.70783	0.220092	0.595989	0.913277	0.784389	-1.70759	0.785663	0.673788	0.486965	0.568654	-1.72988	0.69179	-1.72274	0.316276	0.666374	0.433017	0.934784	-1.71691	0.850835	0.346952	0.612404	0.500539	-1.59327
cg00124993	0.49429	0.777758	0.876613	0.541918	0.254495	-1.00018	0.509519	-0.7479	0.452302	-0.738894	0.453755	0.642276	0.771506	0.686811	-1.66852	0.621265	0.0983753	0.625352	0.632291	0.837126	0.186108	-1.19143	0.643218	0.0940133	0.625014	0.576386	-1.67366	0.295938	0.477186	0.797192	0.839366	-1.65871	0.529085	0.582087	0.765365	0.457951	-1.63767	0.674092	-1.67255	0.197061	0.782272	0.338792	0.811679	-1.65519	0.624413	0.494782	0.807	0.605804	-1.63081
cg08745965	1.42666	0.601834	0.487038	0.694271	-0.0135091	-1.44572	0.260718	-1.00291	-0.0257041	-1.05339	0.259108	0.674977	0.711975	0.488247	-1.56245	0.708711	0.0123463	-0.180288	0.240785	1.46288	-0.0623969	-1.34936	0.298221	0.256446	0.504428	0.822965	-1.6686	-0.0661299	-0.187757	1.0289	0.932496	-1.53147	0.720424	0.658296	1.21473	0.553688	-1.61364	0.774625	-1.59994	0.582292	0.68576	0.212333	0.670822	-1.51042	0.328962	0.887379	0.281417	0.507855	-1.51689
cg16615357	0.409632	0.619177	0.382796	0.910737	-0.119225	-0.727285	0.981452	-0.80227	0.589311	-0.994832	0.271787	0.86126	0.661005	0.773084	-1.37035	0.717371	0.0813212	0.547048	0.790736	0.851957	-0.0707504	-1.28591	0.682264	0.00220371	0.602538	0.548073	-1.77359	0.139615	-1.19246	1.01475	1.02617	-1.71242	0.88351	0.424034	0.274057	0.570304	-1.68719	0.790427	-1.61238	0.436003	0.601284	0.112836	0.90853	-1.44355	0.820806	0.310942	0.545096	0.759718	-1.65373
cg18797653	0.588591	0.648478	0.66306	0.681324	-0.0438187	-1.70081	0.944419	-0.937818	0.891749	-1.06896	0.475199	0.670707	0.873475	0.775525	-1.49428	0.73029	0.121307	0.583929	0.305443	0.78134	0.0589374	-1.36954	0.761825	0.111998	0.673953	0.687588	-1.47686	0.00580719	-1.21097	1.46158	0.909082	-1.6014	0.773466	0.56144	0.810957	0.630777	-1.78924	0.810803	-1.60587	0.00721384	0.671815	0.274723	0.981769	-1.42101	1.29487	0.354062	0.383727	0.784953	-1.48128
cg18872973	-2.17906	-0.419863	-1.46594	-2.29042	-1.91663	-2.09668	-2.55148	1.95149	-1.83527	-1.06372	1.34577	-2.73404	1.75983	-0.0888085	0.0466006	-0.140214	-2.6928	-0.0146498	-0.239139	3.38284	-0.358749	-0.311342	-0.964896	0.726453	0.112829	-0.752663	1.76181	0.213379	-5.43447	-0.238453	-3.72706	0.422816	0.520619	0.0236497	0.935335	-1.92284	-2.93638	-1.02627	-0.939712	-1.92814	-5.76144	-4.94229	1.65734	2.05695	-5.21058	2.74651	0.225006	2.02043	-2.02837
cg17739279	-0.767759	0.442219	-1.56115	0.810136	-0.515888	-5.04855	-0.266997	1.94492	-0.762497	-0.359688	0.587613	-0.381802	1.50444	-0.355171	0.590652	0.209503	-3.92906	0.288621	-2.71693	2.78076	0.348092	-0.342463	-1.62651	0.554381	0.683701	-2.86291	-0.205716	-0.501691	-1.26784	0.759691	0.560081	1.07614	1.18042	1.5172	0.729782	-2.08387	2.3527	-2.21666	-1.56293	1.82323	0.0992412	0.914078	0.556073	0.488778	1.57658	-0.164573	1.10287	2.44909	1.85528
cg01570885	-1.98299	-0.509985	-1.05866	-0.236844	-0.13481	-6.49949	-0.955788	1.26091	-2.01639	-1.45608	0.523021	-0.424376	2.32179	-0.685958	-0.00949835	-2.37797	-4.65008	-1.59354	-1.19603	2.19073	0.315191	-1.26086	-1.39676	0.356044	0.15563	-0.773691	0.180704	-0.711683	-7.25701	-1.72606	1.45876	-0.836137	0.582621	1.35505	0.837376	-3.23959	-0.195577	-3.27859	-1.45946	1.23242	-0.922045	-0.522027	1.03363	1.90866	3.67098	-0.561282	-0.313077	1.238	0.169211
cg09821214	0.682304	0.436537	0.330819	0.191011	-0.647122	-6.85413	-0.356982	0.952608	-0.711438	-0.658966	0.744082	-0.182272	0.407602	-0.00282587	0.849543	-1.21962	0.657357	-1.47435	-0.650302	0.91791	0.282154	-1.32334	-1.03247	1.16311	0.487059	0.46229	0.694059	-0.430017	-2.203	0.273328	0.794081	1.33687	0.865211	2.099	1.11188	-2.34267	0.513337	-0.197231	-0.941787	-0.322372	0.0913064	-0.904971	0.551164	1.20198	-0.279302	1.41139	0.189876	0.728935	0.148685
cg07898446	-0.763847	0.512893	-1.08414	0.54377	-2.1808	-8.84777	0.285902	1.2514	-1.279	-1.13019	-1.29074	-0.659394	0.93677	-0.286625	-0.210183	-3.66067	-4.14471	-1.26933	-1.10985	1.26024	1.87306	-0.804891	-0.628285	1.53827	0.188026	-1.15421	1.30927	-0.484954	-8.45274	-0.525415	1.34089	-0.424097	-0.109274	1.24881	1.51806	-3.3909	-0.0224194	-6.14305	-2.7206	1.69948	-0.427169	1.0434	1.45406	0.0925456	4.47662	-2.14979	-0.233216	1.09665	1.43054
cg25195497	0.830958	1.61749	0.499431	-1.11902	0.184331	-5.4362	-0.774421	-0.401117	-0.167975	-1.67833	-0.252104	-1.02409	-0.614242	0.518653	1.64924	-2.14378	-1.63482	-1.72048	0.684078	-0.339604	-0.929279	0.0218348	0.558008	-0.321998	0.954852	0.645527	-1.08379	-0.300211	-4.20212	0.583124	1.87298	0.736914	1.04246	1.18137	1.22519	-1.86119	2.88485	-3.64229	-2.20146	3.51263	2.02854	-0.940622	0.519926	2.5408	1.02069	0.352017	0.660146	-0.605957	-0.0950577
cg21740964	0.123737	0.729356	0.494423	-1.2087	-0.583854	-5.19705	-0.934512	-0.946301	0.271655	-1.86304	-1.28276	-1.18986	-0.942762	0.922053	1.16671	-2.3688	-0.83233	-1.43711	0.654769	-0.119976	-1.3985	-0.436792	0.847152	-0.311893	1.05824	0.682638	-0.814094	-0.226977	-3.43615	1.74814	1.84901	0.136537	0.784526	0.732335	1.97288	-2.44002	1.33417	-3.4791	-2.64857	3.68145	0.884044	-0.900787	0.167765	3.42787	0.768133	-0.640826	0.629908	-0.229988	-0.392
cg13289019	-0.483025	0.479725	0.198541	-0.327337	-0.319389	-4.37155	-1.1348	0.616636	-1.19445	-0.951956	-0.319475	0.23658	0.661815	-0.480527	-0.163153	-1.82506	-1.91198	-0.782523	-1.11047	0.695026	0.168749	-0.196918	-0.876152	0.894761	0.262393	-0.659679	0.281321	-0.658635	-2.72132	0.0338899	0.870356	-0.938202	0.772341	0.96788	0.752449	-2.39055	1.15209	-2.89811	-1.36683	1.34037	0.34933	0.491918	0.691436	0.589424	2.15323	-1.97034	-0.0608962	0.40382	-0.0279389
cg01905633	-1.32991	0.898137	0.593873	-1.76897	-1.77461	-7.28583	-1.26414	-2.48302	-0.826104	-1.67723	-1.80756	0.175015	-0.0875309	-0.0894462	0.344448	-4.29883	-0.280189	-2.36863	-2.03339	0.407308	-1.25279	-0.672699	-0.9495	0.5684	-1.04977	0.632365	-0.401439	-0.198118	-5.55186	-1.03886	0.560587	0.693958	-0.04743	1.04758	-0.676558	-4.93754	0.393629	-5.78619	-3.26814	0.390308	0.63256	-2.03614	-0.99125	-0.802899	0.545975	2.30111	-0.841397	-0.153842	-0.386361
cg21177626	-0.509664	0.697543	0.245787	-0.7715	-0.956955	-4.15773	-0.349699	-0.541785	-0.414397	-0.642927	-1.28144	-0.0591287	0.173909	0.828661	0.580898	-2.76373	-0.53301	-0.638311	-0.954922	0.778301	-0.0338264	-0.789636	-0.86879	1.13583	-0.060356	0.00912084	-0.510348	-0.305109	-3.71105	-0.316758	1.1347	0.64474	-0.733215	1.14445	0.0916183	-3.02234	1.36839	-2.98494	-2.21865	0.298052	0.883585	-0.0700003	0.421518	-0.792746	0.662738	2.39895	-0.271767	-0.126967	-0.30361
cg03954573	-2.01881	0.749306	-0.578448	-1.91026	-1.8836	-8.46861	-1.74914	-1.55994	-0.579653	-2.00607	-2.88963	-0.518582	-0.284511	0.456974	0.338046	-4.50211	-1.4113	-2.05237	-2.83561	0.888089	-0.605013	-1.85644	-0.793312	0.0702548	-0.513427	0.77773	-0.999699	-0.131682	-7.89444	-0.718533	1.10219	0.595466	0.329565	0.91675	0.362131	-5.45571	1.58965	-5.10803	-4.63983	-0.303223	0.695123	-2.21107	-0.270034	-1.01744	-0.0657883	3.43407	-1.07822	-0.696551	-1.21697
cg19362611	-0.627832	0.49035	0.100767	-0.0503997	-1.12526	-8.7137	-1.55002	0.111923	-0.687995	-0.255058	-1.38422	-1.17588	-0.820234	0.792595	0.0174044	-4.76281	-0.301696	-1.57278	-2.33306	2.20426	0.434541	-1.71127	0.607782	1.14196	0.47529	1.046	-0.718755	-0.283841	-7.21096	-2.11671	1.6502	0.203606	-0.334054	1.38171	0.393808	-4.78967	2.4633	-5.89032	-3.58692	1.07978	0.716639	-1.9238	0.234423	0.298139	-0.255998	3.70805	-0.222026	-0.0173236	-0.421576
cg04447621	-0.738356	0.655213	-0.709301	-1.90575	-0.103714	-13.4845	-1.54884	-3.58627	-1.14966	-3.00837	-4.65947	0.498812	0.129826	0.397517	1.06349	-6.41516	-1.93452	-1.24533	-3.73543	0.624641	-2.00355	-1.82832	-1.23718	0.231723	0.799781	-0.125625	-0.906095	0.879497	-9.46052	-0.103679	1.17369	1.29471	-0.781305	1.35987	-0.382028	-7.21024	0.987264	-8.15734	-5.92965	0.409699	0.842501	-2.17767	-3.24705	-0.386241	0.960062	2.79455	-1.17104	-1.0954	-0.903047
cg23835083	-0.703877	1.05238	-0.912121	-1.08862	-0.846596	-6.91529	-2.19484	-3.93756	-0.885691	-1.15732	-4.08334	-0.477855	-0.453637	0.393553	0.390861	-4.99571	-0.452506	-1.10866	-1.80668	1.32286	-0.809681	-1.19738	-0.0905445	0.503043	-0.52218	0.318122	0.0616624	-0.287339	0.749383	-0.126962	1.63895	0.604969	-0.128551	0.901042	-0.0125836	-6.55551	0.552471	-6.09355	-5.02722	-0.590814	1.1114	-3.77559	-0.891897	0.74034	0.605839	2.93702	-0.981456	-0.0380661	-0.44109
cg12497786	-2.54651	2.14224	-1.35316	-3.33192	-0.228626	-15.9284	-2.21658	-9.06995	-1.35745	-3.35121	-7.44212	0.868885	-1.87325	0.861252	-0.631071	-8.54794	-0.978789	-1.68217	-4.98258	0.62439	-1.65055	-0.79306	-1.09126	-2.48872	-1.69634	-2.62753	-0.0145651	-0.704459	3.13604	-2.5999	0.977245	0.526577	1.84343	0.238948	-0.238472	-17.0006	2.23182	-18.8978	-7.98042	1.93376	1.26843	-4.04334	-4.18866	-2.06827	1.54225	1.76243	-0.459501	-2.19577	1.00692
cg03202897	1.26805	-0.0424608	-0.732785	1.23082	-1.83743	-6.17332	-0.475348	0.11953	-1.52408	-1.50225	-0.572799	-0.455398	-0.994536	0.156209	-0.369621	-2.78922	-0.242037	-0.0635215	0.615	1.4828	1.57286	-0.752589	0.065793	0.820243	0.725712	0.315321	0.119789	0.379105	-4.58763	0.174954	1.12868	-0.771618	0.362092	1.12969	1.75332	-3.50376	0.0541116	-4.15234	-2.02466	0.137506	0.317234	-0.687603	0.842983	0.151427	-3.08929	0.430866	0.180966	-1.14947	-0.084601
cg21153160	0.662122	0.427578	0.98669	-1.7534	-0.721672	-9.42426	-0.911897	-2.06038	-1.56904	-0.759607	-2.04736	0.276919	-0.221873	-0.228964	0.251147	-4.85908	-2.44838	0.267147	-1.17985	1.90251	1.14015	-1.05526	-1.54504	-0.0255798	0.397111	0.191394	0.0870148	1.01587	-3.14906	0.248937	1.04574	0.442223	0.994248	0.269624	-0.167184	-4.62602	-1.57062	-6.99734	-2.77466	-0.316651	-0.540152	0.311088	-0.644607	-2.40226	-0.604666	-0.594172	-0.920712	0.14554	-0.377364
cg25073793	-0.945801	0.743158	-0.759237	-1.08392	-1.54805	-4.03095	-1.85208	-1.6712	-0.351498	-1.3287	-1.86364	0.106813	-0.51157	-0.812561	-0.496409	-2.95435	-1.30425	-0.822183	-1.38712	0.759223	-0.472968	-1.38116	-0.358097	-0.590466	-0.0795271	-0.446073	0.143021	-0.100465	-3.88818	-1.70544	0.761898	0.649933	-0.280958	1.78591	0.162407	-3.66348	-0.155472	-4.70926	-3.03503	-1.79395	0.175748	-3.08964	-0.166375	-0.283392	0.196365	0.355808	0.0194679	-0.0965359	0.375297
cg27445347	-0.138036	0.654781	-0.271626	1.41203	-0.597478	-3.59155	-0.676982	0.608434	0.701221	-0.33687	-0.191532	-0.243321	0.106462	0.224077	-0.115325	-1.83144	0.368436	0.688172	0.550244	1.19088	0.0304753	-0.917469	-0.671982	2.22655	0.363683	0.578542	1.06315	0.153388	-6.97772	-2.09079	1.65988	1.02809	-0.0884287	2.20128	1.57013	-2.36439	0.087904	-3.98312	-1.71303	1.24978	0.209386	-3.20152	-0.20152	0.0357039	0.778885	0.639073	0.455705	0.364855	0.07821
cg13101072	-0.959278	0.412295	-0.386959	-1.15899	-1.24233	-2.4378	-1.43889	0.631957	-0.487723	-1.34719	-0.971449	-0.661565	-0.115434	-0.391406	-0.884534	-0.276663	-1.36211	-0.936638	-1.52792	0.800161	0.772819	-1.21839	-0.0822204	0.0131759	0.431724	-0.0202027	-0.222166	-0.310286	-4.72391	-2.43523	0.846145	0.59755	-0.275671	2.26798	0.257918	-2.8041	-1.44777	-2.36685	-1.33835	-0.40391	-0.465639	-2.9928	0.633484	-1.10712	0.0740654	-0.0128698	-0.375011	-0.216952	-0.0222507
cg09730369	-1.35389	0.273407	-1.57775	1.1142	-2.41151	-5.39074	0.619938	0.0896136	-1.33031	-1.25072	1.10269	0.356722	1.43803	-0.0719371	0.891311	0.667476	-2.39605	1.68026	0.325493	1.65902	-0.47249	-16.4209	0.360382	-0.867923	1.86059	0.297583	2.14276	-1.07392	-1.75147	-1.0834	-1.70531	1.55508	1.68344	1.37498	1.30033	-16.9221	1.00544	-8.81739	-1.9199	0.922558	1.35874	-3.33451	2.09879	2.13956	-2.70308	1.8717	1.21291	1.26477	0.78183
cg17865602	-0.565056	0.880175	0.0290857	-0.688996	-5.29705	-6.02922	-0.426794	0.857284	-0.699773	0.0428267	0.773163	-0.741294	0.429947	0.089437	1.31228	0.300532	-1.5968	-0.858801	-0.934091	0.316329	-0.610877	-7.08114	-0.958225	-2.55675	0.814329	1.42154	0.159477	0.0405902	-2.87837	-0.302741	0.151201	0.161161	-0.701923	0.675584	-0.587385	-8.02111	0.270616	-4.45014	-0.778236	0.485169	1.35172	-1.6171	-0.150669	1.98272	-0.959685	1.92697	0.644213	0.998909	1.32582
cg25350411	-1.27478	0.690683	-1.04204	-1.69222	-3.82437	-5.96803	-1.89204	-0.232468	-1.07475	-0.668033	-0.0549619	-1.96934	0.45211	-0.361706	-0.186181	-0.503164	-0.299939	-2.29511	-2.09887	0.984463	-1.60742	-6.42648	-1.28648	-3.0714	-1.49353	-1.0899	-1.22901	-0.770627	-3.11585	1.24321	0.49572	-1.41794	0.928403	-0.0650011	-0.613475	-6.73756	-3.08839	-4.58299	-1.31609	-1.65708	-0.145719	-3.58699	0.745481	0.431912	-4.10666	-0.744015	0.163168	-1.19145	-0.516438
cg07077459	-1.31942	-0.0553165	0.0250209	-1.26124	-2.43047	-12.0231	-2.13392	-0.420013	-1.09274	0.079813	0.737573	-0.298424	1.41765	-0.643234	0.29783	-0.337427	-1.44896	-1.59009	-0.613687	1.2	-1.02238	-13.6839	-1.89066	-1.287	-1.90213	-1.09698	-0.395709	-0.415233	-12.4094	1.01519	0.822472	-2.53525	2.52286	-0.0933773	0.291689	-13.4152	-2.08013	-3.39024	-0.187656	0.481418	-0.645405	-1.90062	0.920003	1.28531	-2.74784	-5.32778	1.26216	-0.899209	-0.766805
cg22352234	-2.91168	0.209457	0.0662387	-0.771508	-1.83245	-8.01607	-0.203056	1.87187	-1.73609	1.15297	1.32178	-1.60845	0.134585	-0.875187	0.181812	-0.042796	-3.80416	-3.11187	0.61827	0.959571	-0.00229084	-18.7835	-1.49039	-1.37611	0.504151	-0.360056	-0.78362	0.523439	-10.511	-1.07997	0.539967	1.58727	3.05894	0.270596	1.82886	-14.8517	-1.48089	-5.17639	0.449671	-0.472414	-0.480859	-0.666476	-1.40872	-2.14221	-0.370964	0.00677007	-0.910204	-0.228516	-1.48577
cg00702231	-0.663026	0.109646	0.185457	-1.35346	-1.04791	-7.85784	-1.68389	0.468883	-1.26564	0.35395	-0.464056	-2.41074	0.0762358	-0.142377	0.151253	0.28462	-0.314394	-1.95204	-0.463854	1.10061	-1.03823	-13.8381	-2.15265	-0.297117	-1.74579	-0.644342	-0.0633067	-0.425168	-15.8291	-0.834048	0.166373	1.08119	0.607397	-0.94337	0.931028	-13.4872	-0.232589	-2.00995	0.689928	1.33974	-0.0620712	-2.43052	-0.161497	-2.43755	-2.26242	-4.5491	0.587715	-1.13412	-0.309666
cg12757684	-0.888309	1.58172	0.0728254	-1.38658	-0.763702	-9.0937	-2.06671	-0.261297	-0.994259	0.479747	-0.630064	-1.03528	0.0409272	-0.179805	-0.244286	-0.0282758	-2.91855	-3.13955	-1.55415	0.86924	-1.20406	-12.1271	-1.4171	-0.693498	-1.69245	-0.0771988	-0.469007	-0.45925	-14.4677	-0.468565	-0.0120299	0.385826	1.02832	-0.929867	0.409974	-12.7302	-0.797694	-1.83358	-0.772272	0.435761	-0.316266	-2.63542	0.778502	-2.11137	-2.70257	-5.09611	0.482542	-1.04985	-1.06177
cg21952820	0.938009	0.392541	0.217179	0.867044	-0.259911	-1.24547	0.0266049	0.963549	0.282704	0.482964	-0.223484	0.9616	-1.01751	0.226934	1.06621	0.161109	-0.124389	-0.0455639	-1.51101	0.46275	-0.123647	-2.10421	0.103579	-0.0257451	1.25516	0.0135876	0.241972	0.266934	-0.659783	1.58356	-1.29636	1.08202	0.478855	0.0143856	-1.26966	-2.61382	-1.49956	-0.778909	-0.0627346	0.181604	-0.708999	-0.340166	0.110392	0.128906	-0.374319	-0.216329	0.390048	0.779413	-0.117393
cg05326984	0.699745	0.0376968	-0.697955	-0.715518	-3.41824	-9.73233	-0.992208	0.0888985	-0.0524026	0.88483	-1.20922	-0.0701397	0.449455	-0.0103739	1.70466	-0.109045	-2.51166	-3.03016	-0.828368	0.26531	-2.14154	-14.9387	-2.1322	-2.51015	0.276297	-0.516393	-0.0547921	0.166794	-1.70462	3.15337	-0.386017	1.19838	1.31063	-0.588063	-0.793162	-19.2263	-0.392836	-6.24255	-1.50504	-1.39019	0.298386	-1.48701	-0.650029	-0.771285	-2.98409	-1.10966	0.118415	-1.16046	-1.66432
cg08263357	1.49	0.77041	0.84591	3.8188	-2.03597	-2.83342	-0.827306	1.54412	-0.892272	-0.752262	-0.62812	0.238448	0.500491	-0.801905	0.547288	-0.167122	-1.79155	-1.96857	1.34283	-0.180522	-0.843087	-6.90229	-0.388957	0.754841	0.652302	-0.439091	-0.881176	-0.434672	-4.19283	0.339702	-1.05099	0.37357	-0.209688	-0.129313	-0.769415	-6.04295	-2.83652	-2.74477	-0.633367	-0.125268	0.792576	-0.364088	-0.14247	-0.131785	-1.72943	-2.09385	-1.12245	1.17498	-0.632687
cg11532302	0.544543	1.67925	0.637631	1.6939	-1.63467	-4.2306	-0.718795	1.49641	-0.467884	-0.161748	-1.23756	0.290847	0.244193	-1.25508	0.759094	-0.0580562	-3.67964	-1.95163	0.251839	-1.13477	-1.18766	-7.45269	-1.18209	-1.13531	0.112606	-0.891736	-0.662945	-0.737277	-4.95166	1.60514	-1.55268	-0.0126284	1.06273	0.348422	-1.07588	-7.19149	-3.38796	-3.28647	-0.956773	-0.1001	0.90567	0.995101	0.485375	-0.758393	-0.929365	0.439118	-1.54744	-0.0186873	-0.551853
cg27216384	0.342578	0.233692	-0.292113	-1.25162	-3.18389	-7.46538	-0.912783	0.464664	-0.00614663	1.70633	0.0596355	0.0594653	2.11913	0.591703	0.767175	0.696919	-1.70703	-2.30766	0.167848	1.73267	-0.790425	-12.5557	-0.716666	-1.56255	1.08211	-0.0573047	1.07866	0.382914	0.951004	3.59092	1.31519	-0.595174	0.563442	-0.62586	1.20267	-15.2596	0.894269	-4.66503	-0.0300884	-0.988725	1.00577	-1.32544	1.14603	-1.1021	-1.41029	1.68887	0.946829	0.170676	-0.598786
cg17895149	-1.3976	0.491167	0.0442156	-1.34517	-1.35837	-5.81248	-0.529503	0.0933166	-0.755914	-1.05415	0.108486	-1.18146	0.595187	-0.407541	1.04616	-0.0548062	-3.94096	-3.11467	-0.647806	-0.726539	-0.727418	-8.87278	-1.08849	-3.50712	-2.15394	-0.141656	-1.01527	-0.280097	-2.82473	-0.456147	0.232847	-1.67833	1.69353	0.532931	-0.248778	-8.1137	-3.58687	-4.54555	-0.30912	0.126097	0.295156	-2.40069	1.051	-0.98281	-2.47085	1.09324	-2.18537	0.248696	-1.10042
cg23460430	0.000336709	0.765915	-0.329039	1.35877	-2.87682	-3.09731	-0.699839	1.28829	-0.496867	0.047681	-1.0663	0.211582	0.416494	0.711678	0.407629	-0.734392	-2.53894	-1.23761	1.2149	0.509339	-0.327082	-3.85719	-0.938287	0.0994853	0.594168	-1.44836	-0.358495	0.379826	-2.03099	1.17937	-0.525077	0.740532	-1.04534	-0.566496	0.240128	-4.16823	-0.736313	-1.80732	-1.53355	-1.13213	-0.484761	-1.98785	-0.727219	0.476606	-1.13868	-1.37821	-0.473956	0.499202	-1.53159
cg12625139	-1.17989	1.1748	0.0123898	-0.286391	-3.87502	-5.61906	0.120931	-0.56555	-2.64926	-1.09889	0.235975	-0.159259	-0.0561724	0.0995903	1.34809	-7.85685	-1.0655	-2.043	-1.25129	-0.360725	-0.237523	-0.874957	-0.680878	0.353481	0.268693	0.499626	-0.00782253	-0.296299	1.32489	1.95366	-1.10397	0.0476234	0.30231	0.813883	1.24119	-7.46863	-1.32948	1.46221	-10.36	0.634026	0.724836	1.64681	1.40497	-2.18194	-1.73398	1.40903	1.30579	3.30433	1.2473
cg08350488	-0.583056	1.17935	1.01114	-0.959851	-2.02584	-3.51664	0.808091	-0.547387	-0.245064	0.131567	-0.729185	1.56611	-0.361396	1.54102	-0.946198	-3.32287	-0.269937	0.996143	-0.570078	-0.107912	0.487351	-0.409375	-0.00170819	0.406745	0.206299	0.0832782	-0.0680761	-0.95332	2.75966	0.258108	0.407732	0.137904	-0.122139	0.229276	0.0494824	-3.06326	-0.880923	0.254297	-3.61544	1.8996	-0.591512	-0.471343	0.173543	1.45486	-0.370901	-1.65042	-0.120516	5.91338	-0.141887
cg11938672	-0.738541	2.70175	2.48979	-0.923909	-1.85747	-4.00778	-2.04774	-4.48003	-0.539948	2.16783	-0.16785	-0.482198	-0.508758	-0.441246	-0.197507	-3.94785	0.0897665	-0.80883	-0.980615	-0.103682	-1.08431	-0.992818	-4.20727	-0.620641	-0.224471	-0.914389	-0.44366	-0.776359	0.135147	-0.421847	-0.258888	0.195301	-1.22315	2.61209	-0.355837	-3.53459	1.59202	-0.24146	-2.89252	-1.79158	-0.520096	-1.27138	-3.94836	-0.335932	-1.69247	2.26011	-0.880653	-0.4576	-0.580085
cg18322025	0.00253312	2.93164	2.48275	-0.680124	-1.23103	-2.74341	-1.29789	-2.60423	-0.572103	2.40316	-0.0531956	-0.308304	-0.447645	-0.487113	0.0405746	-2.06911	-0.170086	-0.72959	-0.739036	-0.155308	-0.793322	-0.965641	-2.17938	-0.37181	-0.358319	-0.396003	-0.149932	-0.774136	0.180003	-0.0430839	-0.363154	-0.0628356	-0.65751	2.85505	0.00521503	-1.91391	1.75424	8.58262e-05	-1.95474	-0.749395	-0.0614167	-0.811169	-2.04342	-0.26549	-0.884808	2.90315	-0.174608	-0.393466	-0.135019
cg03104936	-0.496903	-1.2268	-0.96266	-1.95452	0.7134	2.29001	0.00870232	0.804459	-1.06826	-1.0016	-0.965184	1.56372	0.500027	-0.60664	0.858095	0.0339005	1.27478	0.424905	-1.27666	0.38083	-0.781205	1.71348	-1.29627	-0.0234227	0.381304	0.881631	0.404252	-0.0651595	-5.22518	0.959597	0.00305527	0.0716719	-0.502815	-2.19085	-1.60951	-0.91503	1.56475	-0.451958	-0.693102	-3.66729	0.160197	-0.936205	-0.920864	-0.315512	-0.374609	2.79774	-0.664538	-1.2172	0.187786
cg05998930	-1.88594	0.0465543	-0.924282	-0.933626	0.34573	0.229628	-0.956726	0.508682	0.11996	-1.41412	-1.72495	1.03997	-0.776241	-0.578551	0.0162654	-1.19586	2.12348	-0.694389	-1.28706	0.0901366	-0.0497	0.663123	-0.880774	0.78749	-1.22111	1.94554	0.171708	0.534289	-4.01454	-0.940636	-0.248911	0.530226	-1.32084	-1.68176	-0.570449	0.231207	-0.684872	-1.35639	0.171618	-1.86188	0.990796	0.922663	-1.25714	-2.31107	-1.39107	0.14443	-0.478977	-0.762988	1.86379
cg09150232	-2.66337	0.691557	1.01349	-2.74668	-0.790985	0.948511	-0.00349239	1.13234	-0.424324	-0.999014	0.389389	1.02995	0.378677	-0.1972	1.3583	0.421843	-0.563907	0.466972	-0.603791	0.49151	-0.35277	-0.323699	0.0167483	-3.28881	0.0607385	1.45244	1.19592	0.799401	-8.57787	0.527881	-1.36961	-0.545806	0.87932	-1.26371	0.0985716	-0.129856	-2.5701	0.808885	-2.84572	-0.469083	1.28617	-0.206023	-0.0927914	-4.17173	0.0168452	2.60221	-0.352018	-0.0133167	-0.263043
cg16349612	-2.11947	1.61432	1.07524	-1.39555	-4.00173	1.00936	-1.22337	2.02935	-0.279778	-1.14689	0.539567	2.62156	2.43097	0.91869	2.95638	0.242006	-0.737612	3.86192	2.56485	3.23155	-0.127599	-0.905381	-1.07631	1.38251	1.81466	2.03907	1.73114	1.00081	-2.91813	1.6699	-0.598876	-0.406146	1.3541	-0.650817	1.88408	-0.804257	-0.681221	2.39214	-3.93638	0.754013	2.67447	-2.41793	-0.449466	0.726291	1.12178	1.53747	2.82812	1.66374	0.903771
cg23742152	-0.275242	0.366166	-0.309629	-1.8265	-3.89666	-2.16156	-0.0592993	0.830971	-1.17008	0.557557	-0.522276	1.25548	0.539649	0.922009	0.706628	-2.65865	-0.671502	1.23554	0.996971	0.156189	-0.423022	-0.742299	-0.1832	1.75488	0.577849	0.458696	-0.888727	-0.303295	0.818567	-1.79697	1.3418	1.18122	1.22537	0.517649	0.62522	-0.62697	-0.129688	0.583916	-0.910851	-0.951515	1.88143	-1.37939	-3.69822	-1.86405	0.309896	2.62289	-0.7514	-0.145529	1.39521
cg08835688	-0.289933	0.0681415	0.695474	1.04335	-5.21019	-3.3628	-0.780099	0.961467	-0.54396	1.23964	0.932141	-0.430371	0.131584	0.66248	0.274683	-5.04346	-1.01405	0.383839	3.48378	1.22111	0.208192	-2.30115	-1.13025	3.21962	0.532103	-1.29769	0.942139	1.90102	-3.9573	0.64245	0.452708	-0.78188	0.770554	-0.484416	0.564909	-0.0496251	0.513923	1.19755	-1.44363	-5.60777	0.0645571	-0.423476	-4.97283	2.22653	-1.25008	-1.78396	1.4855	1.42252	0.297692
cg12903171	-0.67734	-0.937388	-0.787651	-0.14362	-4.0851	-0.753006	-1.67203	0.135319	-0.322949	-0.780921	-0.136949	-0.226224	0.661491	-0.402938	-0.19981	-3.85182	-1.92719	-1.62723	-1.07483	-0.154596	-0.666116	-1.17861	-0.24906	0.802474	-0.149575	-0.33978	0.0527861	0.0689403	-3.63417	0.00493174	0.0484637	-0.109952	0.555573	0.0577422	0.0494774	-0.992534	-1.19644	0.596332	-1.37786	-2.89926	-0.00935776	-0.192058	-3.9293	-0.859056	-1.59922	-1.69311	-1.9328	-0.779722	-1.24021
cg24977055	-4.17105	0.217632	-1.19205	-0.424402	-4.99194	-0.959102	-2.19696	1.31105	-2.22586	-2.40675	1.53965	0.485965	0.0972594	1.31198	0.324178	-5.24281	-4.08561	-1.01732	-0.394021	0.661389	-1.57073	-0.460602	-0.13255	0.827406	2.07882	-1.3879	-2.50058	-0.717918	-0.950691	0.62027	0.725854	0.286754	-0.0487948	0.380295	-1.41788	-0.186689	-2.66988	0.411304	-2.5493	-1.39047	0.0295133	-0.086478	-5.77144	4.63349	0.995704	-1.95225	-1.18062	-0.860955	-1.78307
cg19107595	0.386243	0.647896	-0.0477103	-1.14738	0.570739	-0.622998	-0.800133	-1.9998	-0.744847	-0.992333	-0.341159	-0.0741633	-0.0202489	0.805539	0.282199	0.237275	-1.36665	-0.0737374	0.18826	0.975071	-0.3849	-0.451768	-1.36566	1.45588	-0.955946	0.231738	-0.582007	-0.917038	-3.04137	0.496637	0.236486	1.02429	0.58357	0.514466	0.05311	-0.513168	0.506147	0.485469	-0.204348	-0.499477	-0.280238	0.283244	-0.102092	-0.190379	0.469082	-1.4256	0.285568	-0.517241	0.515666
cg19924104	1.13263	0.30608	0.478548	-0.354789	-1.54491	-0.599062	-0.141955	-5.29044	-0.917376	0.0974229	-0.443475	-0.106094	-0.0699631	-0.0533646	0.633606	-0.0873967	-0.612992	-0.0405287	0.737479	1.27205	-0.00259398	-0.85516	-0.549035	1.5073	0.7273	0.139905	-0.0409636	-0.237721	-3.24898	-0.383243	0.630338	0.532294	1.67556	0.284059	0.654814	-0.355402	-0.575749	1.23758	0.569848	-2.76032	0.460841	1.3781	0.907158	-2.41368	0.38358	0.365893	0.395353	0.434249	0.268063
cg11589966	-0.98163	0.834128	-1.11252	-1.42785	-4.12779	-1.25153	-0.904928	-9.87593	-2.33031	0.36061	-0.868875	-0.0313183	0.839626	-0.207683	0.249974	-0.542672	-1.35425	0.42375	-0.951837	0.597436	0.417824	-0.515902	-0.443469	1.68109	0.594101	0.534603	-0.620215	0.888538	-11.108	-2.25864	-0.580512	-1.37775	0.287667	0.191585	0.356176	-1.09496	-1.20305	0.0190375	0.658561	2.11762	-0.885266	-1.16086	0.132569	0.334292	-2.03073	-0.369277	-0.31089	-0.0993907	-0.612453
cg01566785	-1.06035	0.370279	-0.435413	-1.25507	-1.15419	-1.43123	-0.553243	-9.90663	-1.1749	-0.853423	-0.621873	-0.672168	-0.153792	-0.0903232	0.595822	0.205027	-2.02813	0.0565988	0.333399	-0.455346	-0.0680266	-1.68947	-0.433708	1.48237	0.116909	-1.3858	-0.129037	-0.07321	-7.71326	-2.74367	0.539212	-0.644475	0.125735	-0.224596	-0.0310433	-0.34825	-0.323423	0.890892	-0.684575	0.545096	1.72141	-1.65816	0.79691	0.188339	-2.12972	0.466615	-1.31105	-0.472477	-0.0431602
cg05819130	-0.912053	-0.929599	0.112007	-0.774491	-5.03925	-1.52245	1.58108	-10.0197	-1.28806	0.974458	-0.282653	-1.00748	-0.993165	0.965608	-0.800897	-0.281472	-2.3735	-1.48894	-0.527857	0.0426931	-0.684203	-1.46494	-2.15907	-0.195828	0.637397	-0.561139	0.342218	-0.504644	-7.38973	-3.23112	0.308753	-1.21992	0.724807	0.359826	0.298858	-1.52292	-0.282038	0.176025	1.43496	2.65938	0.674829	-1.7923	0.893221	-0.085467	-2.58789	-2.58908	-0.221364	-0.106315	-0.293588
cg10105290	-0.871897	-0.810718	-0.329693	-1.63816	-2.07834	-2.65153	-0.818696	-10.9466	-0.318587	0.907597	-0.419863	-0.956684	-1.26096	0.607028	-0.153637	-1.035	-1.65073	-1.43814	-1.59957	-0.956497	-0.199268	-1.04415	0.125328	0.113835	0.636435	-0.380542	-1.02787	-0.232849	-7.40555	-3.81261	0.321573	0.36325	1.80629	-0.805118	1.05477	0.319723	0.414463	0.903076	0.0234397	1.50494	1.3888	-2.248	0.296927	-0.457709	-2.86573	-2.62365	0.0299548	-0.985517	0.0601708
cg19079047	-0.576598	0.431729	0.43833	-1.36732	-1.60558	-0.911742	-1.12294	-7.27714	-1.12413	1.33582	0.512237	1.13605	0.80772	0.22212	-0.105857	0.440426	-1.06586	-1.19951	-0.127876	1.10402	-0.17368	-1.28359	-0.503625	0.836059	0.942403	-0.119268	-0.307276	0.26	-6.06871	-3.065	0.4666	-0.562403	1.2017	0.280404	0.730108	-0.848576	0.193414	1.02031	0.949957	1.89893	1.07321	-1.36281	0.95284	-1.91946	-2.28258	-1.99861	-0.283099	0.538978	-0.505356
cg02965180	-1.28602	-0.213257	0.753315	0.00613111	-1.58103	-1.30596	-0.846314	-10.5495	-0.952597	-0.0124264	-0.0925163	1.09844	-0.243127	-0.0927783	-0.685367	-0.0429425	-1.43154	-1.42701	0.182074	0.419876	-0.520848	-0.906675	0.213211	2.07753	-0.467882	-0.419249	-0.198554	-0.60112	-8.02275	-3.32774	1.14501	-0.321202	1.11066	-0.143767	0.361326	-2.06522	0.545815	1.49567	0.062199	1.80581	0.923584	-1.47808	0.660395	-1.47423	-2.24258	-2.00208	0.119147	-0.350218	-0.916238
cg05277165	1.01935	0.626579	1.50855	-0.265427	-3.01113	-1.63202	0.0682129	-11.6666	-0.767982	-0.709986	0.909873	0.48992	0.108108	-0.496594	0.0316067	-1.25404	-1.02163	-0.959019	-0.0646441	1.70916	-0.188335	-0.51432	-0.109522	2.08995	1.13156	-0.324758	-0.275676	1.16967	-2.76117	-0.178821	1.85947	0.44425	1.26821	0.0169401	1.08136	-1.16089	-0.621019	0.628422	0.0292152	-3.4997	1.79986	1.08607	-0.342885	-6.46526	-0.528859	0.163818	1.3914	-0.605649	0.828675
cg06674062	-0.877774	-0.294993	-0.295975	-1.24323	-1.76948	-2.31705	-1.14496	-5.80583	-0.36293	-0.579922	-0.152386	-0.259719	0.525984	-0.623427	-0.370618	0.709527	-0.754001	-1.42142	-1.23638	0.0876876	-0.412938	-1.58648	-0.560946	0.870087	-0.143977	-0.174994	-1.3923	-0.856857	-3.62408	-2.45022	0.536178	-1.01324	1.02715	0.595431	-0.140687	-1.10239	-0.295117	1.37512	0.025841	0.960543	0.82798	-3.03804	0.573713	-0.812397	-3.30351	-2.0268	-0.992854	-0.180918	-0.344089
cg21778340	-0.220122	0.0195893	-0.358572	-1.01172	-2.39684	-0.829595	-0.307104	-4.00251	-0.205114	0.581695	-0.312501	-0.0282698	0.505955	0.124834	-0.0732664	0.636526	-1.57325	-1.17593	-0.420476	-0.0904444	-0.390971	-1.97251	-0.577101	0.808658	1.02132	-0.4028	0.0679829	-0.81583	-3.5149	-1.23972	0.989137	-0.786471	1.88366	-0.225756	0.166607	-0.204435	0.219767	0.691434	0.355519	0.928796	1.38995	-2.59123	1.2311	-0.688739	-1.9687	-2.30908	-1.38697	-0.187472	-0.0447808
cg07921535	-0.894118	0.209709	0.214633	-1.35494	-1.26417	-1.17057	0.332953	-2.42499	-0.129931	-0.101754	0.318154	-0.528182	0.804427	1.0413	0.141772	-0.560738	-1.29439	-0.437505	1.30004	0.395968	0.658126	-1.06555	-0.187297	0.997308	1.12798	-0.52758	-0.0382117	-0.452539	-1.37376	-2.07343	1.02693	-0.413812	0.193961	-0.288634	0.463924	-0.638885	0.156306	0.179218	0.891364	1.02785	1.33074	-1.9289	0.889054	-1.33812	-1.83241	-2.03338	-0.935308	-0.146285	0.0665077
cg09910998	1.96188	0.578058	-0.0248864	-0.418918	-2.55729	0.562133	0.510026	-7.13134	0.473698	0.48129	-0.181639	0.148951	0.763939	-0.731843	0.480482	0.004533	-1.35549	-0.861576	-0.573182	1.1766	-0.250295	-1.04251	0.120002	2.00664	1.59399	-0.335779	0.127929	0.22031	-2.71508	-1.82082	0.83768	-0.432952	1.90853	-0.34275	0.327904	-1.6883	-3.27208	0.364627	0.395929	-4.88684	1.79284	1.66103	0.699559	-6.5524	-0.908894	1.79849	0.828021	-0.767622	-0.457642
cg27393730	0.969067	-0.0694982	-0.242116	-0.927252	-2.36703	-0.204506	-0.460058	-7.29171	0.0312474	-0.0367107	-0.484219	0.27087	-0.541794	-1.17939	-0.67491	0.226778	-1.82832	-1.56235	-0.683673	0.524185	-0.897144	-1.4715	0.601912	1.41184	1.02909	0.428375	-0.681522	0.261219	-2.31359	-0.621343	0.236985	-0.430842	2.00062	0.431313	-0.00909014	-1.9493	-3.02981	0.394484	1.35403	-3.82551	1.3052	2.09851	1.01127	-7.11895	-2.03624	0.699382	-0.278091	-0.538017	-0.844411
cg08291000	0.916797	0.337188	0.252651	0.301597	-1.41058	0.780682	-0.407948	-5.54747	-0.0296422	-0.100264	-0.0487212	-0.371425	-0.0379177	-0.203783	0.96255	0.34046	-0.397912	-0.551465	-0.829513	0.70841	-0.962679	-0.739908	-0.0777157	2.37699	1.47274	0.534378	0.0665265	-0.711526	-2.45322	-0.696302	0.945889	-0.197948	2.04401	0.952811	-0.194976	-1.63441	-2.93038	0.997976	0.803456	-2.67597	1.62788	1.24826	0.239084	-3.96686	-1.85429	1.70152	0.115275	-0.284925	-0.614973
cg27230044	0.830476	1.01976	-0.391421	0.243573	-1.44224	0.520089	-0.212785	-5.00771	-0.408902	-0.409209	0.527475	-0.103417	-0.0668114	-0.327968	0.579089	0.270879	-0.47988	-1.09115	-0.437717	-0.0363481	-0.577517	-0.641011	0.270094	2.14298	0.89804	-0.481746	-0.637598	-0.17623	-2.26481	-0.476537	0.674075	-0.907619	1.89155	0.0537012	0.783528	-0.878821	-2.35567	0.369564	0.334303	-0.088561	1.25851	1.76008	0.457079	-2.87321	-1.32233	2.12466	0.323567	-0.774375	-0.34989
cg24885794	-1.0086	0.280867	0.151066	-0.67494	-2.09498	-1.52319	-0.269826	-4.1577	-0.025541	-0.536523	-0.28872	-0.195216	0.455015	-0.0860527	0.20713	0.0836258	-1.34452	-1.51074	-0.628873	1.0343	-0.295912	-0.975155	-0.00265634	1.03446	-0.364346	0.198378	-0.737294	0.0818968	4.23062	-1.24619	1.25491	-0.760407	1.81315	-0.149383	0.372222	-0.289565	-0.358577	1.05217	-0.0609577	0.728434	0.599091	-0.390818	1.11231	-0.538778	-1.15726	-2.49448	-0.881833	0.125729	-0.389955
cg26997085	-1.67439	-0.00759098	0.350092	-0.486828	-2.76864	-1.8385	0.0530405	-3.80235	-0.274185	0.0101005	-0.267248	1.16385	0.399729	0.477642	-0.0406072	0.212017	-1.04407	-1.57192	-0.632694	0.357984	-0.379178	-1.60957	1.65039	0.861265	0.27217	-0.103817	-0.669743	0.260888	1.03261	-1.82986	1.54439	-0.783645	1.65495	0.00886684	0.376862	-0.566037	-0.825546	0.666858	-0.017995	1.76097	0.568481	-2.28243	0.946797	-1.14287	-1.73155	-2.45377	-1.25049	-0.52048	-0.208321
cg22331138	1.22197	1.34726	-0.0310655	-0.0918899	-3.93533	1.65564	-0.429754	-7.31966	-0.310405	-0.407243	-0.385436	0.449563	0.970006	0.303519	0.906999	0.530816	-0.28012	-0.339172	-0.996791	0.125473	-1.29738	-1.06483	-0.281873	2.49197	1.11676	-0.60569	-1.42151	-0.121203	-1.60047	0.0763587	1.14573	-0.339683	2.32027	1.27925	0.723184	-1.7984	-0.601505	0.727714	0.27982	-5.29358	3.43065	0.245956	1.13787	-2.70547	-2.68621	0.0692807	0.753468	-0.727994	-0.705477
cg16492735	-1.5742	1.06505	0.45585	-0.542756	-2.64798	-3.17568	-0.166863	-7.19602	0.152591	-0.0230623	0.213231	0.77568	0.638278	0.0868286	0.62742	0.602753	-1.63328	-1.76852	-1.10612	-0.14999	0.0927154	-1.85877	0.173511	0.801358	0.321276	0.013846	-1.33574	0.448471	6.35081	-2.05163	1.61474	-0.698684	2.45891	-0.323714	0.257409	-1.11596	-2.53729	0.775761	0.218282	0.224145	1.29097	-2.11678	0.491047	-3.26578	-1.89427	-1.69866	-1.36263	-0.00886611	-0.51034
cg09512080	-1.73913	0.226003	0.344963	-0.118388	-1.93433	-2.61106	0.0154073	-8.01007	-0.188951	-0.422732	0.194004	-0.0595592	0.244301	-0.760086	-0.0635223	-0.148443	-0.796715	-1.10833	-0.30632	0.12093	-0.775148	-2.10261	-0.161903	0.319645	0.234283	0.298159	-1.18822	-0.244882	4.94529	-1.98123	1.66325	-1.51434	1.41019	-0.235285	-0.0983214	-1.18361	-2.68478	1.48413	-0.254176	0.543677	0.580235	-2.44439	1.32846	-2.33165	-1.66207	-0.781984	-1.17359	-1.09806	-0.229484
cg00906934	-0.884337	0.056614	0.435844	-0.846261	-2.53475	-1.60922	-0.266595	-7.28348	-0.354262	0.184631	0.410759	-0.627425	0.742137	0.0320112	-0.00741263	-0.190903	-1.72845	-1.28983	-1.1197	0.72711	-0.417308	-2.09214	-1.03123	0.728866	0.535151	0.390322	-0.839087	0.391062	5.70592	-2.49412	2.01667	-0.512567	1.60091	-0.744642	0.969137	0.0792724	-1.39177	0.32924	0.485071	0.386576	1.11383	-2.19596	2.17797	-3.08222	-0.959183	-1.43096	-1.20806	-0.345797	0.18783
cg26503018	-1.18938	0.584392	0.348075	0.878153	-1.85458	-2.22309	0.364926	-8.26694	0.372772	-0.151091	0.302772	-0.52261	0.576886	0.977656	0.502431	0.205931	-0.649838	0.0807696	0.162458	0.798222	0.00703683	-2.80052	-0.167152	1.31619	0.851492	0.584373	-0.216394	-0.372788	4.64579	-1.11994	1.25573	-0.787566	3.4649	-0.378151	0.803017	-1.62837	-0.871637	1.54509	0.408234	1.93239	0.4236	-2.25311	0.255461	-0.673615	-1.37567	-1.11352	-0.814001	0.238845	-0.466395
cg27120649	0.742675	0.917394	1.25522	-2.29378	-3.38792	0.51105	0.565887	-4.94626	-0.789262	-0.375764	0.31755	-0.0114592	1.34905	0.310704	1.33664	-0.279859	-1.05734	0.82205	0.126981	0.552903	0.512701	-0.727554	0.0574732	1.95485	1.89586	0.133316	-0.315366	0.496371	-0.136875	0.306551	1.78987	0.299601	1.9788	1.41202	1.20676	0.106978	-1.11826	1.45073	1.0343	-3.53015	1.6736	0.953677	-0.0827115	-2.70426	-2.35621	-0.379193	1.25684	-0.170056	-0.0650627
cg21771834	2.59102	0.915483	1.05029	1.74517	-4.10818	1.44547	-0.596103	-10.889	0.331891	-0.0751311	0.198504	-0.217196	0.513167	2.17508	0.536698	1.67655	1.48252	1.66826	0.788742	1.6045	0.747902	-0.309263	0.439748	1.40457	1.64704	1.71957	1.09343	0.315159	-2.00719	1.9589	3.34306	-0.592488	0.89883	1.43812	2.41492	-2.18562	-0.716217	1.64975	0.436825	-5.97212	2.35792	0.633026	0.412058	0.0236591	-4.85803	1.653	1.78785	-0.695585	-0.0827151
cg27001184	-0.212798	1.37231	-0.267774	-0.0545773	-2.44289	0.0133985	-0.712194	-7.70479	0.163315	0.332791	-0.23866	0.331737	0.6546	0.528882	0.515405	0.967663	0.723965	0.240866	-0.590385	0.601087	0.246971	-1.09029	-0.134596	1.9762	0.782305	-0.318959	0.0445119	-0.307485	-1.33141	-0.0660051	1.88991	0.457112	2.245	0.514122	1.42303	-0.91863	-0.932412	0.949916	1.45232	-4.32807	2.23253	-0.0452409	0.518058	-0.315686	-4.7655	2.80301	0.783337	-0.588463	0.207338
cg23342787	0.411577	1.28032	0.322474	1.01718	-3.4559	0.27484	0.896459	-9.78385	0.395124	0.5316	0.188155	-0.241158	0.508362	1.08465	1.04343	1.1349	1.0026	1.78477	0.445704	1.39485	-0.455372	-0.489924	-0.161467	3.49485	1.77807	1.34222	1.33148	0.240152	-2.19255	0.898597	2.90502	-0.0318685	1.5619	1.13897	1.56429	-0.950935	-0.410923	1.90644	-0.063809	-3.93206	1.5009	0.150179	0.179755	-0.357632	-2.84667	2.32054	1.92248	-0.496155	0.922987
cg14873490	-1.16008	0.950107	0.931676	0.228447	-4.37683	-5.33391	0.29838	-13.145	0.146249	0.754896	0.454467	0.281034	0.945272	0.848605	0.908788	-0.32088	-1.28843	-0.306582	-0.307567	2.58367	-0.845476	-1.69399	-0.501434	2.10471	1.14633	0.636422	-1.72372	1.2236	9.3302	-1.92529	3.25184	-0.801621	2.74468	-0.508873	0.806871	-1.48917	-2.49271	0.667389	-0.417882	1.29844	1.37831	-2.63751	1.52701	-2.84918	-2.39665	-2.16266	-0.25513	-1.13104	-0.607767
cg03384175	-0.597305	0.141734	0.198373	1.22258	-1.78363	-2.34142	0.383153	-7.51988	-0.638191	-0.0785531	0.0230803	-0.1179	0.697693	0.405699	0.120318	-0.0834118	0.00858349	0.901671	0.866048	0.650796	-0.916427	-1.20217	0.0662407	3.23033	0.837812	0.211601	-0.816192	-0.379038	4.30012	-1.53223	1.74821	-0.565223	1.0536	-0.387615	1.36894	-0.979567	-1.50625	1.41074	-0.395603	1.94812	0.717439	-1.81815	0.694198	0.286888	-1.32437	1.43359	-0.085361	-0.844479	0.139789
cg11985632	0.375085	0.191897	0.634643	2.85377	0.0309892	-0.911051	1.65843	-7.10349	1.31778	0.541805	0.139278	0.298607	0.248182	0.155705	-0.0999697	-0.304368	1.15815	2.17624	2.20389	2.09926	-0.338477	-1.82128	-0.208393	2.84833	1.16968	1.14139	0.182066	0.483553	3.08495	0.674679	2.64752	-1.18029	0.750074	0.0352953	2.56832	-0.841686	1.59513	0.977843	1.88613	2.26772	0.147472	0.254373	1.00784	2.04107	0.512764	2.61218	0.134902	-1.71289	0.0291051
cg13797824	-1.16379	0.460917	0.10685	1.18709	-1.80865	-1.34287	-0.511855	-6.96903	1.07243	-0.0720427	0.27368	-0.122336	0.408118	0.00824215	0.279948	0.00819003	0.701128	0.614593	1.33797	0.153963	-0.415919	-1.25602	0.101706	2.97274	0.515123	0.686959	-0.227574	-0.30343	3.66182	-0.753765	1.86411	-0.797959	1.53734	-0.265682	1.38979	-1.15355	-0.250058	0.799968	0.135698	1.63442	0.195188	-1.75166	1.3012	0.422994	0.338047	0.67822	0.687183	-0.419666	-0.0674833
cg11175683	0.183031	0.138843	-0.00821151	-0.292634	-1.95454	-0.412038	-0.409707	-5.58415	-0.473035	-0.362502	0.683732	0.211147	-0.345932	-0.362507	0.366119	-0.14846	0.626195	0.453147	-1.05079	0.361092	-0.457716	-1.02903	-0.321699	1.10348	0.360599	-0.311862	-0.287639	0.24332	0.502773	0.501343	0.959267	-0.0962537	2.19	1.29564	0.213685	-1.02825	-0.226254	0.327001	-0.0841004	-1.18347	0.837431	-0.315912	0.578363	-0.660167	-1.81245	0.089416	0.382303	-0.527064	0.273889
cg04521244	-0.390014	-0.103228	0.374521	-0.276402	-1.93463	-0.120109	-0.84353	-5.9504	-0.425713	-1.19503	0.228611	-0.294432	0.29461	-0.701646	0.269613	0.349465	0.0687506	-0.577452	-1.2463	0.597925	-0.369239	-0.832556	-0.646164	1.04963	0.534107	-0.653409	-0.184735	-0.247585	0.62185	0.622003	1.06612	-0.400451	2.63738	1.19841	-0.140933	-1.21038	-0.538972	1.43323	-0.0379953	-1.56806	0.717702	-0.853293	1.11935	0.142408	-1.58784	-0.226596	0.0739921	-0.894096	0.345972
cg11562309	-1.01379	0.584267	0.809842	-0.381956	-1.981	-2.72046	-1.09674	-7.3122	-0.404679	-0.85352	0.104422	-0.207165	-0.0190746	0.372535	0.587813	0.508198	-0.333893	-0.751636	0.128887	0.122282	-0.6615	-1.69223	-0.835304	2.30195	0.9832	-0.139258	-1.33008	-0.78144	2.95304	0.145847	0.988241	-0.488337	3.03294	0.258308	0.778496	-0.428035	-1.0049	1.76012	0.552163	-0.0621109	1.11674	-0.947533	1.90926	0.774067	0.294454	1.4744	0.362943	-0.150662	0.700777
cg18898992	-0.731683	0.915182	0.480577	-0.0648771	-1.98609	-1.5276	0.523265	-7.96438	0.754143	0.13529	0.347344	0.400775	1.12595	0.41375	1.06378	-0.279693	-0.0200662	-0.194058	-0.713514	1.00435	-0.477273	-0.954797	-0.882736	1.03748	1.219	0.0753119	-0.0513115	0.227963	2.96861	0.611338	0.635946	-0.347687	2.44484	1.44233	1.20857	-0.92622	-1.74458	0.91474	0.493715	0.677599	1.09314	-0.582304	1.61626	0.220189	-0.198895	1.4357	1.12888	0.0441857	0.313939
cg05096321	-0.828177	0.104621	0.633488	-1.07843	-5.10935	1.33027	0.342106	-13.2192	0.42414	0.373677	-0.265842	-0.0299872	-0.0673581	0.388025	0.424719	0.748884	0.545891	-0.161667	-0.256666	0.807864	0.0312347	-1.04942	-0.591141	1.56963	1.35239	-1.17054	1.09144	-1.70231	3.05075	1.39123	2.60677	0.142877	2.84201	1.03931	0.580523	-1.66389	-0.0826134	0.735831	-0.231254	-0.727888	1.54761	-0.0448272	0.517623	-0.00419738	-2.72813	-2.27764	1.67627	-1.77179	0.666261
cg19663555	0.765411	-0.180263	0.228059	-0.0721426	-4.05475	0.467749	-0.594229	-9.19397	0.242825	-0.318699	0.351848	-1.05643	-0.641568	0.910929	-0.0245566	0.012038	1.40773	0.146143	-0.533855	1.51793	0.452393	-0.390789	0.252283	0.664473	1.05444	-0.418973	0.476797	-0.421986	3.12552	2.04947	1.82589	-0.478514	2.12451	0.986713	1.50225	-0.389837	-1.39267	1.63909	-0.450144	-0.807663	1.46553	-1.22619	1.62529	0.537914	-3.52124	-2.07042	0.767172	-1.24945	0.417948
cg06695761	-0.188757	-0.0710314	0.841414	0.396298	-3.26471	0.597536	-0.81366	-8.28013	0.358825	-0.433723	-0.0917057	-0.524609	-0.262496	0.632478	0.149234	0.545736	1.35935	-0.0486058	-0.894668	0.769292	0.390376	-1.05618	-0.204593	1.32529	0.521362	0.124174	0.312866	-0.647031	1.07013	1.10674	1.9539	-0.464816	1.58971	0.965562	0.841153	-1.70069	-1.29266	0.755598	0.229199	-1.04842	1.65988	-0.72064	1.30908	0.226429	-1.7415	-1.6503	-0.120716	-0.319156	0.37724
cg21853542	-0.0984854	-0.500012	0.0402427	-1.27614	-2.8024	0.2293	-0.987827	-9.27144	-0.9756	-0.551376	-0.368967	-0.439467	-0.240825	0.51942	-0.0759605	0.210092	-0.106773	-0.691524	-0.558516	1.05297	-0.462258	-0.704508	-0.330891	0.191121	0.515598	-0.541115	0.395293	-0.316905	2.70414	0.930772	1.08794	0.460025	2.18285	0.523209	0.33413	-1.17798	-2.29091	1.27929	-0.0639788	-1.76551	1.97599	-1.13732	1.29451	0.391297	-3.76147	-3.14062	0.112285	-0.131441	-0.0473739
cg04634483	-1.2047	-0.440752	-0.305612	-0.686676	-6.33288	-0.12074	-1.66158	-11.6529	-0.148478	-0.77774	-0.300405	-0.14217	-0.137101	1.72519	-0.331596	-0.106446	1.00319	0.493451	-1.67795	2.44186	0.38307	-1.72884	0.0172076	0.938652	1.25759	0.304458	0.21835	0.0713981	-0.249651	1.26784	2.89174	0.0448378	1.17174	0.818524	1.52155	-1.24363	-1.99553	0.602932	-0.034483	-0.190702	2.39355	-1.64859	1.41441	0.779812	-2.52968	-1.12793	0.756746	0.0878904	0.346095
cg09890341	0.110817	0.980843	-0.942642	-0.117164	-1.70108	-1.39667	-1.06945	-7.82298	1.01725	0.388626	0.619583	0.0409461	-0.214226	-0.202402	1.31068	-0.387027	1.08239	-0.276987	-0.78538	0.255677	-0.81608	-0.824904	-1.02546	0.591007	1.14123	-1.19356	-0.370905	-0.785474	2.88633	0.639387	1.37176	-2.59877	1.546	1.14948	-0.242734	-0.750484	-1.32658	1.43742	-0.131336	0.74309	1.90079	-0.83383	-0.183788	1.6223	0.985153	0.949594	0.776518	-0.0274204	-0.0528496
cg20041873	-0.0446319	-0.0981453	-0.439972	1.22148	-2.23225	0.0192818	-0.204259	-6.22564	-0.401124	-0.514568	0.00209241	-0.280264	0.598163	0.482849	0.746906	-0.370399	0.576712	1.6641	1.06698	0.50817	-0.601331	-1.25389	0.626173	1.33795	0.800425	-0.279551	-1.09814	-0.560731	2.25108	0.633744	1.02199	-2.03027	0.442349	0.277942	0.324857	-0.339797	0.347515	1.1845	0.462305	0.483654	0.363176	-1.07102	0.376947	1.52985	0.922121	-1.09776	-0.644571	0.0867251	-1.17866
cg04303139	0.192661	-0.585385	-0.780082	-0.212506	-4.69764	0.685509	-0.990463	-8.93759	0.0792422	-0.490413	-1.27661	-0.438306	-0.244288	0.400737	-0.210124	-0.418576	-1.3272	-0.392143	-0.550268	1.59902	0.0561537	-1.07461	0.387858	0.76464	-0.461067	0.800906	0.38735	-0.473688	4.0018	0.55382	1.54715	0.439811	0.766743	0.122761	1.02621	-0.20113	-1.96243	1.07899	-0.0836436	0.743038	0.792618	-1.58901	1.3773	-0.382927	-1.5509	-0.85512	0.850427	-0.132896	1.53147
cg03436478	-0.64199	1.78745	-0.405343	0.824298	-2.22426	-0.510473	-1.3563	-7.05979	-0.690147	0.394373	0.0317751	-0.0425831	-0.172978	0.534181	1.49054	-0.56592	0.712661	-0.0735073	0.783352	0.309869	-1.00288	-0.927163	-0.328189	1.0356	0.55694	0.396817	0.0941425	-0.143514	4.26467	0.504973	1.90859	-2.58861	-0.634807	0.584331	0.251068	0.0922263	-0.645796	1.41663	-0.216393	1.59898	1.09422	-1.64653	0.13827	0.521396	1.84971	-0.222364	0.643205	0.714594	0.144718
cg05509218	0.308245	0.866472	-0.219937	-1.01395	-4.47549	-1.41929	0.409431	-8.97202	0.188437	-0.257418	-0.739515	-0.405659	-1.27212	0.762342	-0.028483	-0.301121	-1.34308	-0.547694	-0.154135	0.487363	-0.193836	-2.5458	-1.33922	1.05076	0.854918	0.231446	-0.900388	-1.01916	3.53673	-2.42283	2.24081	-1.80082	0.877874	-1.58678	1.6477	-0.623207	0.438698	0.872837	-0.520414	-2.72748	2.0724	-3.23189	0.867987	1.28864	1.04696	1.58782	-0.472791	0.669521	-1.05891
cg22924867	-0.0363502	1.7131	0.260124	-0.691161	-2.68334	0.252614	-1.45148	-7.42012	-0.664361	0.0631963	-0.327332	0.0740579	-0.0635158	0.278662	0.59871	-1.07936	-0.401265	-1.13248	-0.160225	0.437039	-0.807883	-1.51429	-0.746782	1.8491	0.378881	0.190453	-1.20678	-0.842402	5.9477	-1.95475	1.82121	-0.217752	0.0257944	-0.595658	1.3798	-0.930301	-0.898508	1.83022	0.00552796	-1.79854	1.15725	-2.24832	0.363784	0.367735	1.24368	2.28896	0.593036	-0.868236	-0.641411
cg01169624	-1.98973	1.04771	-1.90541	-2.14169	-2.35444	-4.03598	-1.68808	-7.68745	-1.99974	0.66453	-4.28435	-0.281939	0.12435	-1.32158	0.520031	-0.900548	-1.4437	-1.73555	-0.834117	-0.0896526	-1.3245	-1.48056	-1.01338	-0.533244	-1.53242	-2.71235	-2.4812	-0.874275	0.324128	-3.16069	1.11166	-0.679876	1.16302	-2.76958	-0.445727	-1.28247	-3.61374	0.340633	-0.168207	-3.73444	1.5514	-0.449815	0.527284	-3.58033	-1.52853	-0.741913	0.553651	-0.351812	-1.83848
cg03682823	-0.865107	-1.55657	-0.918234	-0.741241	-3.53821	-1.7145	-1.29922	-8.88918	-0.603493	-0.748804	-2.08558	-0.935956	-0.377251	-0.434501	-0.571323	-0.397427	-1.59351	-1.32266	-1.5205	0.149701	-1.11696	-0.989563	-0.150494	-0.367068	-0.543158	0.930807	-0.693258	-0.80292	1.05258	-0.801627	0.540657	-0.838077	0.387937	-0.0450007	0.790116	-0.595063	-1.4824	1.2767	0.0656212	-1.77215	0.525459	-1.91393	0.710745	-1.68222	-3.16328	-0.0145106	0.206708	-1.20977	0.0497395
cg18139769	0.916936	-1.27563	-1.00143	-0.116555	-4.9775	-1.30153	-1.77809	-11.6703	0.362074	-0.864205	-2.75205	-1.45013	-0.942044	0.209997	-0.550135	-0.487269	-0.139511	-0.992953	-0.430584	-0.261302	-0.209163	-1.48451	-0.0350393	0.400448	-0.347467	1.04625	-0.169685	-0.354192	1.00474	-1.32739	2.18789	-0.463913	0.0847243	-0.706839	0.675909	-1.10557	-1.58194	0.718574	1.0744	-0.638826	0.228209	-2.03436	0.591741	0.211215	-1.45545	-0.0745012	0.648791	-0.711985	0.642608
cg12397924	-0.720701	-0.326237	-0.482965	0.891857	-3.20414	-2.22733	-2.56311	-5.27206	-0.353125	0.574164	-1.87556	-1.48367	-0.0296677	1.2595	0.48914	-0.430139	-1.64935	-0.099956	0.721747	0.154642	-0.32143	-0.407877	0.897812	1.89472	-0.557291	1.54157	0.257394	0.484051	-5.84345	-3.23893	1.61936	-0.56222	0.689173	-0.768829	0.500237	0.176656	-1.43914	0.869524	1.18823	-3.13991	0.653474	-2.5317	1.79563	-1.35603	0.880888	4.93185	-0.116461	-0.673561	-0.419151
cg15696408	0.111954	-0.512628	0.254491	-0.122833	-2.42222	-2.14777	-0.598916	-2.52558	-0.113736	0.673118	-1.07533	-0.658318	0.150975	0.417186	0.965138	-0.334737	-1.04889	-0.306739	1.60532	1.3695	0.969544	-0.442959	0.418557	2.4665	-0.0383026	1.12809	0.71642	-0.0246483	-0.0670426	-1.87025	1.5518	-0.689169	0.775718	0.0876219	0.418978	0.00107927	-0.360366	0.305371	0.926988	-2.44295	-0.162105	-1.43027	1.81036	-1.13559	1.61651	5.04336	1.23197	0.199705	-0.934089
cg22820921	-0.090473	-0.384015	0.60465	-0.144868	-3.63129	-2.65509	-1.94072	-5.80586	0.457387	2.79079	-2.43783	-0.475249	-0.513891	0.753593	0.887034	-0.382771	-1.73237	-0.296525	0.430952	1.27135	0.998531	-0.143996	0.662542	0.973978	0.759027	1.92508	-0.0211275	-0.00767352	2.43	-2.79126	1.69611	-0.486693	-0.0723888	-0.326601	0.105907	0.101782	-1.1329	0.737827	1.26908	-3.44927	0.497471	-2.09289	1.17987	-0.792231	0.061362	5.37428	1.3116	-0.251535	0.294929
cg10473158	-0.207038	-0.28511	0.175621	-0.870945	-5.66143	0.880943	1.66463	-2.96023	0.530609	0.497576	0.199179	-0.183259	0.0821926	-0.323336	0.88698	-3.9922	-0.0563736	-0.967332	-1.11213	-0.782573	-0.226057	-0.854734	-0.742729	-0.20842	1.16401	-1.92563	0.487406	-1.93762	-1.59468	1.00826	0.7747	1.38984	1.01005	-0.21573	-0.0572355	-0.772004	-0.240256	0.0171313	-2.12697	1.09703	-0.281306	-1.76628	-5.62952	0.115372	-3.25199	-3.25148	-0.833263	-0.792307	-0.433264
cg05222671	-1.18586	0.290076	0.844501	-0.141515	-5.64872	0.485341	-0.704748	-1.88422	0.480352	-0.465328	1.36573	0.870594	0.222852	-1.38832	1.11647	-3.60027	0.878428	-0.648902	-0.367125	0.560045	-0.563808	-0.846969	0.492881	0.154417	1.54964	-0.903019	0.543368	-0.539628	-0.164474	1.20468	-0.999739	0.048169	0.659654	1.06746	0.87811	-0.938414	0.504741	1.26736	-1.28602	1.0273	0.725563	0.192979	-3.03613	0.56855	-0.605128	-4.21079	-0.619893	0.309981	-1.1747
cg10767216	-1.04534	-0.939575	0.502118	-0.53786	-5.89749	-1.17107	0.172869	-4.50432	0.0391363	-0.262724	0.589454	0.0589266	1.49571	0.154631	1.00573	-4.14005	0.376294	-1.45202	-1.43689	-0.762877	-0.0158207	-0.000820009	-0.472902	0.169228	0.774641	-0.149367	0.248702	-0.0548986	-0.456645	-0.539796	0.0546677	0.624468	0.663942	-0.65949	1.18395	-0.695867	-0.407164	0.0327844	-0.111626	1.40952	0.949946	1.18015	-5.57222	-2.97249	-1.83641	-2.71627	-0.808469	-0.228974	-0.514733
cg12070022	-1.31852	1.07547	0.31274	-1.17995	-3.00847	2.78562	0.734503	-0.861345	0.29135	0.574062	1.92902	1.00925	1.10567	0.895746	2.09335	-2.72269	-2.85416	-0.160419	-0.343946	1.09362	0.144799	-0.396937	-0.47695	1.09828	1.56723	0.615963	-0.269317	0.106305	-1.63706	0.11566	0.732187	0.261878	0.0960182	0.803424	1.10888	0.124333	0.447204	0.553127	-0.942793	-0.517074	0.566074	1.00692	-0.821472	0.157687	-1.48912	-2.23341	-0.529791	0.931961	-2.33819
cg02756856	-0.217496	1.29366	-0.256444	0.575257	-3.08281	1.23141	0.67033	-1.76915	0.37028	-0.682303	0.711461	-0.964598	-0.705458	-0.0039509	1.2388	-4.82595	-1.118	-0.757689	-1.26405	0.581053	0.107416	-1.36676	0.285036	-0.00793348	0.409801	-1.83815	-0.332513	-0.865861	1.69406	-0.268221	1.14686	0.231687	0.342409	0.987222	0.944444	-0.928094	-1.96467	1.09775	-1.30887	-0.274641	1.13723	-0.308852	-2.76143	1.2038	-0.58837	1.39209	-0.41168	0.0230132	-2.8282
cg26275543	-1.40701	0.680099	0.341546	-2.07895	-5.8586	-0.0606914	0.179284	-4.28762	0.260486	0.429335	0.239119	-0.347503	0.42696	-0.733875	1.3938	-4.6086	0.252528	-1.56755	1.62742	-0.154529	-1.60806	-1.09948	-0.0218052	-0.231463	1.97773	-0.651647	-0.663238	-1.05849	-6.30655	0.442996	-0.224637	-0.200142	0.455798	1.71782	0.045182	-1.48671	1.67921	0.983258	0.043962	1.88595	0.46588	-0.872795	-6.71638	1.28134	0.0305705	-3.58996	-1.06279	-1.21865	-0.181026
cg20826277	-1.7512	0.781103	-0.155526	-0.152225	-5.6529	0.117286	-0.160267	-1.74271	0.563618	-0.0145124	1.64253	-0.283019	0.54344	-0.183803	1.34296	-3.37974	-0.669508	0.752404	-0.674031	1.84992	0.253448	-1.19047	0.523431	0.788048	0.463467	-0.487168	0.364025	-0.0291812	5.13018	0.662487	0.232536	-0.457399	-0.0250862	0.0122193	2.10975	-0.474547	-2.90661	1.41009	-0.595875	0.817245	0.824947	-1.67727	-3.91904	2.87493	-2.46614	0.663497	0.490928	1.72883	-0.85789
cg14584935	-0.806992	0.899871	-0.827791	-0.685223	-4.917	-2.18577	-0.330018	-2.6564	2.02235	-0.264533	0.740907	-0.0787177	-0.68173	0.57428	1.15568	-4.72266	-0.794006	-0.530696	-0.904752	0.334339	-0.215514	-0.9028	-0.0230666	0.690666	1.06488	-0.830489	-0.817502	-0.561256	4.7348	-0.367044	0.622601	0.228641	-0.470004	0.208594	0.761761	-1.18797	-2.14801	0.728208	-0.501053	0.813538	0.37204	-0.983916	-4.08296	0.036119	-1.955	-1.3948	-0.596488	0.110067	-1.43649
cg24941047	-2.41501	0.606786	-0.682648	-0.624043	-7.77413	-1.99579	0.670507	-6.13422	-0.251187	-0.353813	-1.51289	-0.146974	0.993342	-0.311981	1.38826	-5.96119	0.490123	-1.48261	-0.169854	0.52337	-1.49927	-2.16423	0.809753	0.946454	-0.151436	-1.08229	-3.23725	-0.193951	-1.66712	0.177298	-1.38141	-0.36023	0.0114422	1.47082	-0.145485	-3.8097	0.776028	1.06881	1.15258	-0.474198	0.384037	-1.16133	-7.30947	-0.79844	0.84538	-4.82076	-2.90673	-1.31372	-2.09359
cg02501418	-0.674047	0.968901	-0.378849	-1.81048	-7.85264	0.742379	0.397237	-5.35426	0.18828	0.363577	-0.961345	-0.698501	0.668437	0.269441	1.67038	-7.43678	1.1821	-1.4037	-0.67312	1.41089	-0.415383	-1.73525	-0.832683	1.3341	-1.38416	0.00759515	-2.16213	-0.235106	-5.2826	0.00217008	-0.738541	1.04708	1.45816	0.868371	0.0320543	-1.81394	0.996529	1.32573	0.718541	-0.755359	-0.0282732	-0.328822	-7.69049	0.601941	0.386811	-2.34642	-0.813295	-0.603711	-1.68841
cg08229366	-2.06045	0.535912	0.237316	-1.26619	-5.18315	-1.81205	-2.051	-4.1876	-0.294539	0.287871	-0.147137	-0.659747	0.742675	0.425667	1.8426	-5.79615	0.177621	-2.35499	-1.41941	-0.0828019	-1.31279	-1.39708	1.01826	-1.27157	-0.443353	1.10397	-1.43505	0.92775	-3.32827	-2.40079	0.621483	0.665184	0.474823	0.770622	-1.1656	-1.44756	-0.198779	1.05117	0.23418	-3.08504	1.46913	-2.3662	-6.30736	-2.23548	-2.21705	-2.7134	0.591952	-1.65596	-1.59271
cg07224147	-0.852918	0.0222782	0.383859	-0.858211	-4.71616	-0.0133335	-0.482488	-4.46653	0.0952443	0.754797	-1.05082	-0.57573	0.374027	0.910607	1.26885	-5.06038	0.653448	0.174477	0.718038	1.06642	0.194203	-1.68691	0.191481	2.67043	-1.36646	0.716772	-0.95621	-0.314699	-2.29502	-0.324212	0.672347	0.399458	-1.68763	0.748921	0.435431	-1.15303	2.29255	0.723215	1.12162	-0.047859	1.18007	-2.21488	-5.22061	-0.518044	-2.36439	-1.98881	0.193308	-0.584569	-0.715925
cg27417677	-0.191105	0.649395	0.454181	2.65879	-4.87364	1.44305	0.171082	-5.05714	0.505583	0.480717	-0.173234	-0.373075	0.0339282	1.12757	0.285356	-5.28303	2.25348	3.31711	1.57796	0.735743	0.206598	-1.02162	0.0254997	4.07786	0.997041	0.813202	0.0572903	0.332855	5.3164	-0.15397	1.01899	-0.430015	0.363307	-0.00594306	1.01816	-0.357736	-3.90102	0.774808	-0.117093	2.20348	0.0282777	-3.07432	-6.46308	2.65191	1.5683	2.81186	-0.438863	-0.113697	-1.20755
cg09003373	-0.465924	0.606882	0.320095	-0.617887	-3.63506	0.771888	-1.63532	-2.976	-0.0860976	0.525115	0.105684	-0.586023	0.362419	0.0388517	0.749585	-3.27791	-0.45562	-0.75014	-0.14498	0.654422	-0.646486	-1.06764	-0.44292	1.12794	0.1253	-0.0162591	0.0561384	-0.69689	-2.17154	-0.0783388	1.07433	0.366468	0.312361	0.866338	0.251558	-0.730016	-0.53584	0.566887	0.174736	-0.506776	0.266887	-1.68858	-3.99223	5.38077	-0.354736	2.01858	0.432196	-0.274179	-0.194454
cg14088957	-0.317727	0.336985	0.210582	-1.1285	-2.84293	-0.326686	-1.47016	-2.52836	-0.0706039	0.435435	0.0491235	-0.908646	0.98648	-0.670492	0.381482	-2.75863	0.586043	-0.782142	-0.576184	0.199032	-0.532771	-1.16764	-0.234187	0.49029	0.404064	0.114081	-0.172475	-0.504818	-2.61139	0.210508	0.495584	-0.0882461	0.899643	1.12825	0.0708935	-0.548545	-1.79093	0.932287	-0.134422	0.0589674	-0.20534	-1.34779	-2.68622	-0.28121	-0.842322	1.74937	1.3364	-0.355536	0.0132935
cg06100421	-1.11481	0.515985	-0.0349248	-1.19969	-3.4431	-0.466826	-1.64118	-3.36982	-0.663354	0.208039	0.444959	-1.14263	0.664942	0.0994993	0.618675	-3.94107	-1.23416	0.117083	-0.632646	0.557377	-0.833506	-1.53136	-0.662938	0.711063	0.333519	0.368894	0.0247547	-0.0654446	-3.07938	-0.971825	0.727481	0.129859	0.893836	1.13497	0.228231	-0.0494905	-0.812282	0.501804	-0.439763	-2.40078	0.766419	-1.10927	-3.72029	-1.35692	-0.633802	3.16277	1.12079	0.00359311	0.212713
cg20297423	-0.537231	0.117336	0.79202	-0.0429639	-4.91527	-0.584006	-0.975449	-4.63186	-0.515152	0.690482	-0.0818826	-0.509922	0.903405	-0.140923	1.22716	-5.56297	-0.321403	-0.996846	-0.517613	1.661	-0.95379	-1.49199	0.205565	1.18995	-0.18304	-0.0696263	0.200856	0.294468	-3.81536	-0.601947	1.2875	-0.151075	1.23691	1.36694	0.529656	-0.931222	-0.100249	0.300212	1.24239	-1.89845	0.745922	-1.18241	-5.60969	-1.50681	-1.13095	4.34054	0.935014	0.381359	0.303609
cg05369791	-0.844372	0.380864	0.754057	-0.224183	-7.15159	-0.372619	-1.18322	-5.66856	-0.18148	1.3896	-0.130296	-1.52021	1.40166	-0.356271	0.546998	-7.47222	-1.7606	-0.340285	-0.618461	1.32134	-0.354024	-1.27571	-0.0986049	0.126966	1.65027	-0.0843648	-0.104688	0.173627	-0.227514	0.00609858	1.10343	-0.0857033	1.02918	1.62464	0.281181	-0.0043272	-0.285575	0.562454	-0.356818	-1.40207	0.491823	-0.532678	-7.36681	-0.848521	-0.824075	1.63606	1.72384	-0.497546	0.858782
cg13917504	-0.496006	-0.334727	-0.27361	-1.43196	-6.52039	-1.00238	-1.08812	-4.77741	-0.123166	-0.684438	-0.797453	-0.206083	0.761628	-0.0857957	-0.0415092	-6.1593	-3.13108	-0.64648	-1.37368	1.39226	0.160247	0.158486	0.241965	-0.0845983	0.845374	0.406841	-0.1857	-0.0205879	1.56771	-1.46074	0.788056	-0.368215	0.28287	-0.28384	0.777095	-1.09359	-2.16256	-0.0820452	0.25448	-0.49621	0.827572	-1.40216	-7.38755	-0.753376	-1.69248	-3.06575	0.0372582	0.302117	0.320673
cg25407198	0.0630063	-0.246679	-0.197462	-1.37472	-6.93587	-1.25947	-1.16254	-6.07132	0.490022	-0.0204923	-0.740413	-0.292189	0.223861	0.257757	-0.051046	-7.13226	-4.01307	-0.0197221	-0.818256	1.26479	-1.20034	0.465698	0.466002	-0.650797	0.775847	0.578662	1.38834	0.491744	-1.87114	-0.917363	1.20767	-0.166551	1.25253	-0.55556	1.38762	-0.262737	-2.83407	0.68318	-0.421778	0.857203	0.293278	-1.5817	-8.25495	-0.413216	-1.55437	-3.00303	-0.266926	-0.407157	0.084473
cg21667116	-1.45075	0.0600105	0.116088	-1.08991	-5.38771	-0.289679	-1.40769	-4.33049	-1.07331	-0.348848	0.0371392	-0.386371	0.541626	-0.579399	0.275074	-4.81104	0.0604666	-0.413141	-0.511389	0.357663	-0.76463	-1.30057	-0.903168	0.555734	1.12363	0.207222	0.608724	-0.48712	4.70048	0.40356	1.012	-0.574645	1.58601	1.33721	0.0420775	-1.01695	0.223129	1.14231	-0.14214	-0.191817	-0.299348	0.152128	-5.6458	0.350072	-3.09912	1.93877	0.483703	-0.949688	-0.271068
cg23156962	-0.653417	0.842088	-0.302574	-0.650734	-4.52382	-0.203686	-0.508205	-3.96837	-0.30916	-0.310392	0.157476	0.060436	0.827611	-0.25882	0.246645	-4.71597	0.041873	-0.37812	-0.080764	0.537312	-0.524883	-1.29308	-0.466723	0.98848	0.884541	0.348818	0.0112545	-0.751798	4.93208	0.471566	0.574098	-0.909036	1.01904	1.06272	0.288093	-0.747007	0.543811	1.18051	-0.243111	0.853311	0.149138	0.43792	-4.93742	-0.812738	-2.65717	2.4856	1.10277	-0.141382	0.296936
cg17079325	-0.0238178	-0.776908	0.99483	-1.19108	-11.6909	-1.65171	-1.11149	-6.76381	0.5634	-0.810124	-0.297862	-1.05309	-0.294035	2.61096	-0.183046	-7.65384	-2.51578	-1.07881	-0.650843	1.88017	-0.207933	-1.22783	1.67824	-0.199521	0.732222	-0.00805857	0.310176	0.819403	1.98484	-1.70749	1.46499	-0.438035	0.241596	-0.054452	0.342174	-0.976063	-2.66565	-0.946212	-0.027479	0.27596	1.26711	-2.6258	-14.8889	-0.702309	-3.30209	-3.49744	-0.516732	-0.0645898	-0.56474
cg04344875	-0.371153	-0.610632	0.012825	0.151063	-12.0323	-1.55904	-1.01579	-6.93006	0.910672	0.0454985	-0.93823	-0.635016	0.156744	0.928162	-0.668738	-8.10806	-3.00152	-0.635499	-1.04322	1.96984	0.453113	-0.931955	1.27722	0.655198	0.740007	-0.307981	-0.0781539	0.120264	3.68607	-0.562627	0.681259	-0.636877	0.0803774	0.67268	1.64882	-1.85052	-3.2033	-1.14425	0.739607	1.10786	-0.0714746	-2.74046	-15.6617	-0.112367	-3.35833	-2.36898	-0.348117	-0.626285	-0.861157
cg00286878	-1.90967	-0.796961	-0.317088	-0.981859	-7.60489	-0.867668	-1.78466	-7.03157	-0.0506822	-0.194468	-1.20017	-0.691936	0.11639	0.307092	-0.877132	-7.13096	-3.28909	-2.19829	-1.76417	0.926625	-1.65611	-1.3166	-1.15676	0.509841	0.302763	-0.570145	-1.162	0.465559	-0.763144	-0.693787	1.36841	-0.40357	1.1648	-0.86839	0.376446	-1.07252	-3.71309	-0.30022	0.810686	0.847764	1.01581	-2.38974	-9.28473	-0.471769	-3.33084	-2.33787	-0.888412	-0.531567	-1.00695
cg12347392	0.506104	-0.394499	-0.808565	-1.35897	-4.18411	-0.437919	-0.47476	-4.59293	-0.20761	-0.751867	-1.14674	-1.17065	0.46657	0.532739	1.06854	-4.8949	-1.77316	-0.266328	0.0988317	0.0622644	0.379329	-1.88827	-1.27205	1.33672	-0.731984	0.323205	-0.561338	1.22805	1.22885	0.440683	-0.481894	-1.38849	0.347128	-1.77021	-1.32343	-0.685953	0.189338	1.44357	-0.327106	0.949145	0.258144	1.06898	-5.07953	-0.480531	-1.67252	-3.44494	0.847933	-0.801913	-0.39771
cg04786207	-0.151596	0.576494	-1.00375	-1.17666	-6.62624	-0.924015	-1.37844	-6.21315	-0.337182	-0.362961	-0.73889	-0.709543	0.987266	0.614791	0.204059	-6.60414	-0.551401	-0.676389	0.371519	0.113756	-0.648176	-1.73541	-1.15719	1.29974	-0.726109	0.0766923	-0.762148	0.272931	1.07447	2.23965	-1.01474	-0.605819	1.82434	-0.741822	-0.969316	-1.73033	1.20477	1.75157	-1.05215	1.63868	-0.542911	0.430722	-7.06341	-1.59636	-1.51706	-2.90075	0.912457	-0.57047	-0.899732
cg19386484	1.38188	-0.612698	0.335621	-1.03708	-4.11423	-2.43119	-1.04065	-4.3897	0.999266	-0.415455	-1.0825	-1.28458	1.90376	1.44528	1.75164	-4.56013	-1.61392	0.419654	0.598531	0.912267	0.577832	-1.05913	-1.29847	0.564285	-0.893906	0.667311	0.185798	0.486718	-0.723865	-0.0525579	0.593601	-1.30752	0.877483	-2.0295	-1.23905	-0.714171	1.49849	1.89794	0.435997	0.178463	1.3267	1.82345	-4.49145	-2.45359	-0.815024	-1.6519	1.07415	0.497705	-0.60415
cg26708559	-1.52712	-0.441327	-0.416775	-1.97794	-5.62429	-0.75035	-1.58872	-5.30128	0.0306202	-0.300346	-0.717895	-0.664599	-0.184259	-0.84823	-0.435005	-5.19147	-3.21369	-1.5282	-1.89569	0.725348	-1.0993	-1.28728	-0.771059	0.287076	0.0264342	-0.573154	-1.05334	-0.0570725	-2.47668	0.332848	1.11507	-0.256772	0.968551	0.0159217	0.70641	-1.20583	-3.90727	-0.105777	-0.316063	-0.472315	-0.129792	-2.3888	-6.64256	-1.08424	-1.57047	-1.74044	-0.363667	-0.46396	-0.526692
cg22705386	-0.104164	-0.930536	0.140279	-2.21561	-6.04118	-2.73759	-1.88518	-4.70816	-0.906664	0.430842	-1.15971	-1.47974	0.52553	0.421188	0.84151	-4.96966	-1.12204	-0.856364	-0.718349	0.522018	-1.08323	-1.37095	-1.43555	0.953901	-0.0938968	0.410877	-1.39273	-0.466029	-2.68014	1.29207	0.876952	-0.784573	0.407834	-0.605738	-0.593959	-1.05467	-0.163108	0.343126	-0.278456	1.97368	-0.282523	-0.238549	-6.00177	-3.36547	-1.02071	-1.38673	-0.830631	-0.951165	-0.910638
cg06212135	-0.490122	-0.232034	0.143727	-2.37683	-6.84609	-2.9813	-1.31615	-5.56138	-0.909748	-0.0495554	-0.555846	-2.97544	1.13406	0.757315	0.999426	-5.22197	-0.729481	-1.25061	-0.734802	0.640401	-0.747996	-1.92501	-0.343636	0.973228	-0.894348	-0.110004	-0.87261	-0.836394	-3.01547	1.25055	0.0542519	-0.924331	0.474899	0.013728	-0.515185	-0.493317	0.346191	0.551843	-0.0725811	0.809194	-0.26102	-1.39727	-7.36556	-2.88871	-0.01511	-1.94611	-0.731223	0.460526	-0.938792
cg10249538	-0.636835	-1.4207	0.326434	-1.87326	-5.32224	-3.47618	-1.04023	-4.57712	0.172249	0.920585	-0.46016	-2.05287	1.7077	1.06371	1.23411	-5.02992	-1.21161	0.404887	0.62916	1.2048	-0.492464	-1.53295	-1.21524	0.327471	0.458786	-0.297059	-0.390971	-0.682293	-3.1857	-0.253887	-0.377912	-0.435877	-0.502436	-0.550763	-0.295017	-1.45691	0.192462	1.08068	0.71278	1.30022	-0.263213	-0.303402	-5.47846	-4.17353	0.724808	-2.51372	-1.77678	-0.277799	-0.971726
cg16823958	-0.581398	-0.440487	0.158023	-2.87954	-8.03696	-3.37488	-1.77567	-5.65074	-1.44846	0.303251	-0.950738	-2.87162	0.831185	0.559146	1.22653	-7.54233	-0.545944	-0.960092	-0.053361	0.290074	-0.237042	-2.34032	-0.833116	1.06668	0.252637	0.71667	-1.4413	-0.99502	-2.49899	-0.43502	0.709639	-0.806629	0.00837013	0.4017	-0.780439	-0.8274	-1.22608	0.260527	0.494575	0.290698	0.603404	-1.00589	-9.82665	-5.59865	-0.378326	-5.7813	-2.02962	-0.667124	-1.71617
cg13104298	-1.88859	0.461375	0.537657	-0.944778	-7.12165	-2.98805	-1.35069	-7.14863	0.173435	1.0662	-0.769437	-2.93239	0.0676146	2.02295	1.3153	-8.43503	-0.586111	0.0651644	0.237855	0.71588	-0.734716	-1.11148	-1.02159	1.15523	-0.841753	-0.374211	-1.6603	1.13028	-0.901073	-0.26826	0.81141	-0.407245	1.65926	0.73697	-0.788486	-1.44919	-1.6575	0.572899	-0.0553043	0.171128	0.719844	-0.959924	-11.1041	-4.95903	-0.391082	-6.56692	-1.77425	-0.493493	-2.05194
cg05556276	-0.694032	0.422596	0.61806	-1.84828	-6.00893	-3.59021	-1.85543	-5.16222	-0.769885	1.24902	-0.893286	-1.31051	-0.0342832	0.313649	1.99347	-8.7757	-0.45713	-0.0273752	-1.05972	0.433148	-0.0268296	-0.406074	-0.567746	2.0257	-0.0411671	0.0903842	-1.93629	-0.0606882	-3.01308	0.823819	-0.24503	-0.748317	0.0538076	0.371698	-0.39934	-0.141711	-2.449	1.73365	1.18334	-0.343773	1.00647	-0.653793	-12.714	-3.12386	-0.906813	-5.48407	-1.06826	-0.654955	-1.61003
cg17580798	-0.602209	-0.099879	0.771647	-1.31653	-4.89856	-2.2147	-0.58795	-4.50078	-0.659057	0.778697	0.0263874	-1.34774	0.020574	0.29722	0.697374	-5.95682	-0.102489	-0.723762	-0.367402	1.04271	-0.568197	-1.08805	-0.0471784	0.871339	-0.793316	0.874823	-1.84196	-0.460651	-3.56314	0.364325	1.25549	-0.65058	1.13514	1.07105	-0.294124	-0.205002	-1.39746	0.762414	0.743777	-0.027821	1.14874	-0.986657	-8.18867	-2.55759	0.331559	-3.30596	-1.60733	-0.407974	-0.47086
cg27589003	-0.340104	0.927244	0.911298	-0.846841	-3.33047	0.10181	-0.164039	-2.9037	-0.341845	0.481109	0.615881	-0.332929	0.936961	0.176195	0.748246	-3.62916	-1.16309	-0.608139	0.0254025	1.41705	-0.0804983	-0.822265	0.00588839	1.65846	0.356686	0.487904	-0.762488	0.751202	-0.722608	-0.084265	1.0524	0.554892	1.08277	1.03185	0.805268	-0.804007	-1.64922	0.23234	1.23643	-1.90798	0.897033	-0.790559	-4.47357	0.117779	-1.76734	-1.85055	0.588415	0.844196	0.126069
cg21200654	-0.459433	0.163301	-0.106244	-2.2906	-6.06734	-0.607269	-0.915019	-4.18416	-0.302644	0.0428806	0.199581	-0.780688	0.049054	-1.02107	0.450335	-5.17928	-1.92706	-1.50453	-1.56793	1.23759	-0.829075	-0.343239	-0.702101	0.686475	-0.0483093	-0.443619	-1.4424	0.221999	-0.47175	-0.708859	0.85052	0.732966	0.493942	0.481394	0.226268	-1.96238	-2.80005	-1.00502	0.175633	-3.41835	-0.153984	-1.93586	-7.28634	0.848249	-3.20709	-1.6552	-1.54887	-0.011984	0.488268
cg25519926	-1.46298	-0.0582493	-1.33499	-1.896	-10.5799	0.390923	-0.498611	-6.24011	-0.399024	-0.469156	-0.850381	-1.07243	0.123332	-0.215375	0.244881	-7.89511	-2.52306	-2.24731	-1.7743	0.805091	-1.22881	0.0124964	0.112929	1.43727	-1.11639	-1.59576	-1.27529	0.523318	4.46584	-1.46113	0.348158	0.660002	1.20368	0.519589	-0.575559	-2.22121	-4.92837	-1.63081	-0.606314	-3.31406	0.742008	-1.963	-10.4492	-0.715481	-3.40697	-4.36289	-0.130149	-0.309156	-0.283985
cg09462536	0.257085	0.614618	-0.248551	-0.881359	-3.83863	-2.36362	-0.773074	-2.5534	-0.874947	0.286105	0.106578	-0.518259	1.34508	0.283077	-0.281603	-3.29292	-0.91581	-0.404842	-0.599948	0.140973	-0.828699	-0.34124	-0.641393	1.29409	-0.0694465	0.311499	-1.00032	-0.30338	-1.05096	1.72499	0.955279	-0.33975	0.644023	2.06018	0.724986	-0.295928	-1.77868	0.502277	1.08897	-2.58398	0.401153	-0.118243	-4.43562	0.429804	-0.0696567	0.600639	-0.39083	0.151	0.860186
cg22592140	-0.0341322	1.27404	-0.113868	-0.805953	-5.51305	-2.90723	-0.842143	-3.76507	-0.631269	0.601037	0.0331571	-0.904517	0.899107	-0.321135	-0.0434167	-5.49884	-1.13128	-0.386092	-0.890544	1.27822	-1.06353	-0.948435	-1.88689	2.23705	-1.05471	-1.19434	-1.97637	-0.074961	-0.72685	1.81164	2.02961	-0.2286	1.37046	2.07883	0.589993	-0.888452	-3.60486	0.240148	1.39441	-3.26463	1.58294	0.0741097	-5.81623	0.127861	0.660801	-1.16199	-1.23639	0.987584	-0.233455
cg03588221	-0.687954	1.11158	-0.512671	-0.333627	-10.1072	-0.208771	-0.539587	-8.21795	-0.963085	0.23631	-1.81491	-0.841989	-0.0193507	0.17003	0.988052	-8.98151	-2.39285	-1.24977	-2.15518	1.33447	-1.02999	1.22665	0.346249	0.0599672	-0.222245	-0.0131883	-2.0105	1.04971	8.35866	0.787461	2.42709	0.751606	1.2273	1.56559	0.671844	-1.49759	-1.42429	-0.565508	0.134613	-3.74477	1.33302	-1.20145	-11.0982	1.39978	-4.87828	1.01515	0.266804	0.319883	-0.227375
cg13986840	0.419995	-1.01173	-0.976922	-0.897005	-2.98846	-1.83765	-0.385072	-0.236446	-0.614426	-1.04232	0.175754	0.00809322	0.425008	-1.07568	-0.284898	-2.26782	-1.9692	-1.32148	-1.31436	0.23198	-2.07207	-0.829731	0.176315	2.4027	-1.3744	-0.500616	-2.00062	-0.827757	-3.53482	-0.291441	0.990726	1.39963	0.142539	-0.0452871	0.630928	-1.76141	-1.63308	-0.982049	0.427228	0.800518	0.72071	1.56952	-3.43904	-1.68307	1.88823	-0.431577	0.843596	0.28246	0.554676
cg23312013	0.378951	-0.459845	-0.0437183	0.248324	-3.81826	-0.316629	-0.91385	-1.94015	-0.576772	-0.989667	-0.695001	-0.328826	0.331456	-0.803182	0.508372	-2.93974	-1.69154	-0.762272	-0.890654	0.0075219	-1.01288	-0.555654	-0.384975	0.819608	0.596226	-0.431521	-1.49058	-0.00352585	-1.99243	-0.359972	0.725665	0.773148	0.479562	0.0791585	0.6402	-0.860196	-0.656066	0.515436	0.269392	-2.16723	0.115806	-0.427796	-4.92224	-1.28982	-2.95804	0.0115299	-0.345219	-0.291744	-0.486274
cg14952237	1.92281	0.448462	-0.517909	-0.622838	-5.80243	-1.38212	-0.880878	-2.14611	-1.18226	-1.14707	-1.58933	-1.10491	0.359752	-0.701619	0.727207	-2.96835	-2.24386	-1.85435	-2.25845	1.3123	-1.83149	-0.727207	-0.239753	1.81801	-1.49415	-0.684189	-1.0053	-1.06925	-4.18018	-0.00913352	0.506841	0.695443	0.731509	0.00190508	1.22442	-1.71076	0.669589	-0.162595	-0.58326	-3.26376	0.0865993	-0.3139	-5.93582	-0.0462222	-0.0714162	1.51005	1.13269	0.110097	-0.565495
cg05260959	0.362784	-0.387387	-0.647424	-0.217023	-5.57773	-1.1154	-1.53286	-3.16227	-0.529228	-1.67603	-0.418385	-0.235455	1.04652	-1.10019	1.02468	-3.12196	-1.31085	-0.559063	-0.523909	0.625151	-1.51687	-0.337734	-1.0383	1.02171	-0.385767	-0.7065	-1.17065	-0.976253	2.11283	0.965949	-0.0127588	1.62687	0.0469588	-1.77472	1.79685	-0.76492	-0.289047	-0.108293	-0.381531	0.863575	0.353346	0.465114	-6.03718	-1.41865	-4.31472	-0.970591	0.527746	-0.632807	-1.10576
cg12924654	-1.19858	0.910334	0.583701	-1.14861	0.0729167	3.61305	0.708591	0.745198	-1.85252	-0.057707	2.89926	0.578505	3.36668	1.20618	2.50459	0.120373	1.63683	1.1339	1.82983	2.09364	-0.771761	-0.204646	-1.07434	-0.919698	2.30033	-1.07171	2.86527	0.727684	5.4045	1.21799	0.296261	-1.55	2.42738	0.113383	2.23276	-0.70492	-1.98716	2.20693	-1.06265	-0.567059	0.311183	-0.23777	1.42208	2.53551	-0.274287	-0.563638	1.83436	2.78381	0.730559
cg05719902	0.0482961	0.451496	-0.0381629	1.27849	-6.44992	-0.428061	-2.08527	-5.29368	-6.05974	-3.40322	-0.637749	1.70255	1.50005	1.06537	1.56884	-4.37835	-0.0565271	0.526218	0.124172	1.70725	-4.64738	-6.27455	-5.27797	-5.93061	0.462646	-1.61806	0.153074	0.976175	-1.54524	1.03543	0.807421	-0.715532	-2.15656	0.311978	1.70126	-2.85596	-1.42392	0.749093	-1.05614	-3.73882	-0.146701	-3.15079	-5.02475	-2.82076	-2.05266	-0.185465	0.103622	0.703169	-0.511231
cg25780543	0.583577	0.122388	0.195542	-0.919968	-1.94498	-1.92949	0.132513	-3.46628	-0.302604	-2.00948	-0.215972	1.14826	-0.0612732	-1.67846	0.302324	-0.505189	-1.00189	-1.30277	-0.0465014	0.0540516	0.861595	-1.91681	0.492307	0.284873	0.187755	0.405729	-0.391827	-1.53067	-2.95782	0.0537012	2.28526	-0.436536	-0.238843	1.15906	2.17147	-1.69527	0.81969	1.18924	-0.715854	-0.0559728	0.404973	0.500158	-1.10516	-4.78534	-1.2122	-0.844004	-0.985116	-0.344149	-0.360086
cg25058023	-0.805142	-0.685061	0.655561	-0.0065504	-0.151058	-2.47105	1.26555	-1.27239	-0.472135	-0.293801	-0.0919149	-0.000826098	-0.269816	0.661515	1.24172	0.182632	-1.85779	-0.953724	0.663822	-0.224317	0.18833	-4.38089	1.68373	1.96647	0.809897	-1.65616	-0.932416	-2.62835	2.376	1.06198	0.157423	-0.446913	-1.0424	0.679095	0.153508	0.160238	0.144478	1.73762	-1.05402	-0.0269938	-0.148554	-2.37985	-1.34561	-3.97267	-2.69277	-1.021	-0.104341	-0.737053	-1.46825
cg03024742	-1.06003	2.26576	1.30946	0.30439	-3.24546	-1.37114	0.669528	-0.055869	0.699913	-1.45403	-2.58319	-1.09115	-2.16118	-0.532303	1.08703	-0.668647	-0.0941225	-0.382252	-0.854485	-0.737078	-0.732388	-3.93397	2.9545	0.454259	-0.718317	-1.28285	-2.9353	-2.87801	-8.48159	-0.868578	1.62951	-2.0222	-0.192436	2.34318	0.70498	-2.09732	-0.160089	1.37702	-2.9625	-2.22112	-0.374081	-0.844865	-0.720924	-6.46075	-4.25576	-7.03038	-2.63718	0.122863	-0.951395
cg10538202	0.78074	2.9045	0.450168	-0.183659	-0.393518	1.65089	0.42643	-0.464219	-0.930595	0.0706315	-0.434491	-1.56972	3.1801	1.58057	-0.53658	2.08692	-2.13762	0.0814634	-0.394985	1.1779	1.07691	-1.58701	1.26238	0.616455	-0.00935372	-0.0876403	-0.249198	-1.25169	-3.87046	1.38719	-1.75412	-0.518334	-0.367853	1.48814	0.0915153	0.173658	1.29116	1.57533	-1.98495	-4.83281	-1.15697	1.55443	-2.32454	-4.18088	-0.266376	-3.60343	-3.18355	0.0181315	0.115021
cg09623773	0.292408	0.442011	1.11546	-0.890924	-0.370737	0.946343	1.2836	-2.45353	1.79669	-1.30486	-1.02422	1.12767	1.25593	-0.098667	-0.00951648	-1.87479	-0.489458	0.940696	0.027734	-0.891159	-1.25678	0.330692	2.33668	0.888918	0.326065	-0.250558	-1.10886	-0.353543	0.791421	-0.92991	-0.141617	0.445175	-1.37389	0.27082	-1.0227	-1.83431	0.53415	0.956467	-0.807915	-0.183699	-1.48912	0.333813	0.282266	-0.857407	-0.329059	-3.14913	-1.81759	0.711869	-1.06183
cg13346869	-2.11051	1.44607	-0.527272	-1.01051	0.907179	-1.75265	-2.21981	-1.40745	-3.11603	-0.595543	-0.905291	0.0534909	1.32183	-1.37932	1.25252	-1.33182	-1.39163	-1.03872	-0.911522	0.312846	-2.03268	-1.32464	-0.953766	-2.26421	-1.31444	-0.198865	-1.49554	-0.8262	1.11884	-0.0424884	0.537983	-1.59308	-0.548471	1.37171	-0.511538	-3.1369	-1.67257	0.764981	-2.48645	1.72354	0.493207	-1.77457	-3.01119	-1.81537	-1.84214	-0.204838	-1.62415	-0.25636	0.35084
cg05020125	-1.09337	-0.202727	0.0850355	-0.416339	-0.640153	-2.98165	-2.99399	-1.96394	-3.66904	-0.318414	-0.668512	-0.18948	1.96318	-0.824151	0.887666	-2.72256	-1.89619	-0.100229	-0.841582	0.353389	-2.16496	-1.62239	-0.205653	-2.87028	-1.02223	0.409856	-1.15057	-0.159124	-3.37889	0.218934	0.818123	-0.56481	0.339151	0.812749	0.0116349	-4.27618	-2.36932	-0.0731781	-3.58547	-2.07611	-0.735325	-0.396575	-4.6715	-3.68778	-1.99186	1.07354	-0.797681	0.0855522	0.892546
cg21505509	-2.02955	-1.29991	0.792364	-3.05945	-1.38245	-4.50686	-5.01976	-3.65515	-5.10354	-1.68233	-2.65173	-1.20351	0.663465	-1.29204	0.653726	-4.23752	-1.21735	-0.0226021	-2.68106	1.83173	-3.34343	-3.25687	0.755617	-4.01748	-0.729541	0.410481	-2.3528	0.32523	4.44745	-2.76645	1.1084	0.473465	0.320506	1.7314	-0.560342	-6.26167	-2.50251	-1.33558	-5.50701	-0.258589	0.353406	-0.926952	-5.36849	-3.0573	-4.64236	-1.81844	-2.89067	0.521517	-0.356573
cg08247852	-1.37018	0.137151	-0.0236541	-0.427083	-1.29646	-4.10018	-2.87378	-3.55734	-5.07199	-1.59931	-1.23324	0.6362	1.08004	-0.88158	0.466495	-3.99873	-0.154791	0.983998	-0.160121	1.37855	-2.20029	-1.63403	0.413348	-3.90492	-0.902439	1.87129	-0.199975	-0.66152	3.9101	0.7136	1.48163	-1.23778	0.559524	1.15964	0.449768	-5.50862	-2.27124	-0.379574	-5.70033	2.47781	0.397438	0.208836	-5.51147	-3.45534	-0.740072	1.57661	-0.00397927	1.19766	1.02579
cg09188212	-0.368357	0.939272	-0.0587862	-0.677058	-3.43494	-0.229915	-0.107237	0.749737	-3.52638	1.36092	2.25668	-0.985784	2.30532	2.39397	2.09517	1.84167	-3.29057	1.86389	1.66983	2.09381	1.36838	-0.0674687	0.0568381	1.30797	-0.970301	2.5534	1.79771	-1.31169	0.161804	-2.92024	1.18575	-0.045358	2.27141	0.39161	1.14128	-3.2808	-0.987709	1.63457	-2.19036	-5.7679	1.45636	-0.949176	1.22025	-0.606079	-5.97861	0.292351	0.720728	2.45403	0.853268
cg00450319	-1.34614	-0.187271	-0.50702	-1.2271	-0.809973	-3.39981	-0.0141301	-0.178276	-3.94098	-0.0709887	1.04704	-0.969521	1.31182	0.688706	1.6665	0.608212	-2.72205	0.966613	1.27011	1.83536	0.428093	0.37182	-0.334282	-0.729094	0.0695222	0.698476	1.23743	-0.113142	-5.47556	-0.418745	1.11082	0.213918	-1.33526	0.491638	0.437932	-4.67326	-3.84653	0.0811986	-3.85494	-3.32792	1.98059	0.134658	-2.52951	-0.756483	-4.7024	1.74302	-0.626365	1.87317	1.49227
cg21926091	-1.13389	-0.504579	-1.16537	-0.542897	1.98695	0.822142	-0.0279045	0.517057	-1.30031	0.471066	-1.62687	-0.693647	0.271238	-0.363198	0.232093	0.904974	0.836822	-0.203029	-0.351426	-0.112102	-1.38885	-1.25036	-0.511771	2.85001	0.679028	0.119613	1.34687	0.13655	-0.341708	0.571584	1.07439	-0.055026	0.99155	0.470413	1.6811	-1.01711	-2.41563	1.94173	0.140324	0.512277	1.23416	0.403206	1.43101	2.66769	-1.76411	3.17279	-0.141485	-1.08095	0.397884
cg22502459	-0.924545	1.20793	-0.781071	0.544756	1.32912	-1.37932	-1.83459	1.5315	-1.48104	-0.479367	0.745353	-1.05642	1.21286	-0.306616	0.688767	1.08172	-0.492164	-2.07385	0.692924	0.690912	-0.839248	-0.803695	-1.95096	0.806806	0.99888	-0.131735	-0.737785	0.988172	6.7437	2.07232	1.99629	1.32317	2.3872	2.57202	0.943736	-0.902929	-4.64097	2.77302	0.216066	-2.00305	2.6456	-0.184492	2.00497	2.25401	1.10746	1.81868	-0.63053	-0.332041	0.731215
cg13713522	-0.650922	1.75402	0.245774	1.00739	2.31329	-2.78538	0.209027	-0.139145	-0.74083	0.548076	0.121561	-0.696809	0.756067	0.530298	1.08609	-0.0577106	-0.805791	-1.5351	0.562887	0.429297	0.285989	-1.25835	-0.543914	2.34616	1.46365	-0.275191	-0.346705	1.28646	4.08294	1.18107	0.0450254	0.932382	1.38957	0.939184	0.564747	-1.32929	-4.67508	1.3404	-0.107604	-2.7604	1.41372	-1.26887	1.05754	2.28919	1.17068	0.221902	-0.420523	-0.692867	0.399998
cg07878171	0.971856	0.96618	-0.0229885	0.0284856	1.70095	1.21369	-0.876244	0.211601	-0.796991	-0.377174	0.780482	0.621795	1.3216	-0.409085	0.259184	0.46229	0.318468	-1.31798	-1.21473	1.44745	-0.995975	0.0521696	-1.91554	0.519784	1.0368	0.342702	-0.353317	-0.0214866	1.28132	3.7073	1.74735	0.893061	2.27731	1.28785	0.70288	-1.19526	-0.353778	1.36111	-0.288948	-0.0753401	0.197016	-1.48885	0.428334	-0.44677	-2.07022	2.23452	-0.435889	-1.33648	-0.174865
cg03803002	-0.558803	1.27137	-0.414353	-0.101839	2.42174	0.719813	-0.120524	1.15057	-1.28043	-1.04415	0.500399	-0.0219083	0.30493	-0.858923	0.136276	1.36361	-0.640778	1.21486	-1.5188	1.37951	-0.785069	0.869253	-0.617816	1.77866	0.974429	-0.792535	1.51658	0.919035	5.25366	-0.168488	1.4813	-0.520291	1.12248	1.57117	0.0836238	-0.250806	-2.73239	0.482562	1.24234	3.44385	0.869991	-1.44213	1.13012	0.580264	-1.32467	0.464057	0.0835479	-0.168772	1.18516
cg00155882	-0.402226	-0.0162478	-0.775777	-1.13118	0.633688	-0.239478	-1.48396	0.415366	-0.444027	-0.571949	0.264125	-0.420585	-0.0848854	-0.303874	0.453954	0.649527	-1.27892	-0.615439	-1.04657	0.217438	0.200155	-1.455	-1.02865	0.864004	-1.02856	0.00958939	-0.67244	-0.890586	-4.66813	0.58182	0.460561	0.409302	0.418571	0.606912	-0.106219	-0.6929	-2.25754	0.560621	-0.00584409	-3.14125	0.496737	-0.714013	0.366531	0.851712	-0.326081	0.342469	-0.827059	-0.342738	-0.181312
cg22807877	-0.673243	0.751948	-1.27456	-0.161251	1.28275	-0.912788	-1.70659	0.708627	-0.675885	-0.251955	0.947086	0.312655	-0.213651	-0.0769626	0.634121	0.226014	-1.0078	-1.67988	-0.785819	-0.159605	-0.830303	-0.782215	-0.476788	1.4413	-0.542145	-0.525149	-0.431162	-0.2901	-4.69167	-1.01425	1.31866	-0.499167	0.658184	0.206737	0.622968	-0.731912	-2.62961	1.1199	0.201121	-1.67315	0.306811	-0.583568	0.0797284	0.726056	1.22059	1.00063	0.30389	-0.555867	-0.649303
cg21891967	-0.484595	0.466027	-0.127693	-0.19076	-2.4912	-3.47933	-1.97386	-2.94133	-0.655942	-1.8257	-0.757265	0.378113	1.29893	-3.01814	0.877228	-3.19139	0.271628	-0.645294	-0.297078	0.739689	-4.01104	-3.11652	-4.8376	-4.38001	0.101877	0.570769	-0.614888	-3.18622	-1.26122	0.335927	0.948508	-0.661417	0.686979	1.13191	0.442505	-3.03665	-0.173822	-0.543433	-5.00884	-1.57771	0.871254	-1.55617	-3.87056	0.389633	-0.814481	-0.949569	-0.0500233	-0.05295	0.215784
cg02722214	0.336363	0.49933	1.17015	1.79383	0.256998	-1.8958	1.21226	1.19961	0.878501	2.02813	-0.683114	-1.58454	-0.758793	1.70274	1.01484	-2.38692	0.0108235	-1.41594	-0.684704	-0.595216	0.96163	-1.98422	0.635065	2.44048	1.17811	-1.08087	-3.37996	0.604672	-7.54906	0.662045	1.57981	0.126141	-1.33528	-0.0913558	0.77491	-2.41652	0.564436	-0.825321	0.65034	-0.22069	-0.948398	-0.602602	-1.22167	-4.22604	-2.26067	-1.04415	-1.40543	-0.778102	-2.80474
cg02857557	-0.167343	1.54015	-0.0447219	0.341474	-1.24254	0.60404	-1.08901	0.35266	-0.620436	0.207059	-0.00607429	0.400874	0.614353	-0.159095	0.993456	-1.07311	-3.40347	-1.37086	-1.66954	-1.29061	-0.822953	-0.530371	0.19902	-2.2485	0.810918	-0.00094793	-2.72943	-0.591129	2.24134	1.13802	1.1289	-1.15153	-0.0528951	-0.397021	-0.0927385	-2.81853	0.109999	0.488354	0.868868	1.2277	-1.33601	0.0225614	-0.914802	0.625181	-4.00835	-0.603466	-0.893877	0.34947	-0.733835
cg25045785	-0.147645	1.23477	0.858931	0.370407	-0.359726	-0.45007	-0.39531	0.3867	-2.15696	1.35126	-0.421556	0.0961476	0.713796	0.248931	0.97742	-1.80753	-1.03869	-0.257764	-0.982806	-0.646085	0.0214094	-1.29799	0.448958	-0.552271	0.314641	-0.181644	-1.5973	0.470785	-1.35428	0.744116	0.785646	-1.39404	-1.02051	-0.402602	-0.269487	-3.33261	0.866745	-0.861674	1.22811	1.06497	0.0352917	-0.347137	-1.17956	-1.43216	-2.87218	-3.59893	-1.21568	-0.324982	-1.78341
cg02807948	1.8298	1.22244	1.77144	-0.336241	-0.451273	0.883179	-0.463996	0.305595	-1.76845	-0.521706	-0.457687	2.53861	0.401229	1.07327	-0.760245	1.01328	-0.0443501	0.471431	1.01204	3.31008	-1.31177	-0.560375	-0.452498	1.61943	0.574762	0.477254	0.572858	-0.754841	1.41664	-0.432595	2.3134	1.08117	-1.06701	-0.526201	0.416646	-0.794282	0.0563465	1.74053	0.0110921	0.140794	0.63994	-0.732031	0.0294646	-0.385901	0.322346	1.51269	-0.642076	-1.17164	-0.242576
cg13165070	4.3224	2.52022	2.92418	0.252648	-0.850874	-0.538952	0.94998	0.883393	-0.433311	-0.304452	0.134725	1.01898	0.331804	0.668111	0.578562	0.372702	0.209221	1.3748	0.545866	2.4022	0.481713	0.0597515	-0.861578	1.71535	-0.642871	0.698638	1.85128	0.190627	0.145585	-0.977973	1.7708	1.71892	-2.02356	-0.0883635	-0.113082	1.23361	1.5659	-0.451389	-0.756563	-0.3689	1.50855	-0.35704	2.33483	-0.318807	-0.197859	-0.328109	0.786945	-1.93393	-0.324565
cg07096953	2.48196	3.44835	3.33889	-0.90203	-0.117576	-1.77814	-1.44978	0.690006	-1.39692	-0.354913	-0.340201	1.98238	1.03776	0.349876	-0.200261	0.406412	-1.38611	0.638682	-0.202276	3.77046	-0.539835	0.786667	-0.608188	1.40953	0.149556	0.651114	-0.255187	-1.10235	2.76964	-0.029839	2.29501	-0.197992	-1.1955	-0.53834	-0.451332	-0.578444	0.838594	1.08898	-0.67011	4.40369	0.425581	-0.524231	0.51565	-0.517968	0.480581	-1.17367	-0.142373	-1.13704	-1.14434
cg02613624	0.483937	2.88488	3.11624	-0.485802	-1.43539	-1.01226	-2.24374	1.42633	-0.782959	-0.768342	-1.28185	2.11548	-1.57489	0.0886545	-0.649837	0.261848	-3.08534	-0.0827656	0.122904	3.05358	-1.76331	2.10369	0.604714	-1.08643	1.23025	1.40428	-0.968938	-1.46238	1.21927	-1.66022	2.037	1.55601	-1.42704	0.295272	-0.408345	-1.6295	1.61794	-0.375889	-1.71329	0.942985	-0.86553	-1.62087	1.5952	-3.13425	-2.28578	-0.0265903	-0.181872	-1.93523	-0.715542
cg22956483	1.23931	2.68713	1.12857	-1.65569	-1.46599	-0.4392	-1.1121	0.151564	-0.23506	-0.961051	0.551931	2.04979	-0.0548536	-0.252101	0.423522	0.785767	-1.06023	-0.977408	-1.181	2.19913	-0.74033	-0.0802467	-0.120494	0.577089	-0.111144	1.53219	0.694886	-0.975085	4.88992	0.187163	1.83425	0.58498	0.00101329	0.283033	-0.458192	-0.0788661	0.170868	0.339591	-0.808607	2.29742	0.0707215	-1.22683	1.03199	-2.64991	-0.214566	-1.14158	-0.646528	-0.843725	-1.32537
cg26401390	2.21878	5.45908	2.9174	1.22476	-1.93224	-1.54337	-1.18575	1.18861	-0.86814	-0.645863	-0.24576	1.34748	1.24133	-0.320445	-0.244593	-0.890712	-1.50126	0.607548	-1.94031	3.86456	-0.630441	3.29294	-0.0406053	-0.649446	-0.197072	1.98716	-0.32823	-0.74408	-2.94635	-1.08964	2.35137	1.30831	-1.88398	1.45582	-0.374061	-1.64826	1.03	-0.463855	-0.456888	1.12989	0.0954665	-2.07287	1.15218	-3.74983	-0.207951	-0.560957	-1.09248	-0.62908	-1.54583
cg05384664	1.79925	3.91496	4.08017	-0.751925	-3.45841	-1.46537	-1.86597	-0.391431	0.0219331	-1.16863	-0.0394541	0.356732	-0.256676	0.975684	1.14224	-0.629231	-0.529186	-0.106287	-2.4878	2.40705	-0.398283	0.779351	-1.67836	-0.0337088	1.3701	1.62235	-2.66616	-1.68159	5.82061	1.60238	3.45641	1.59474	-1.16193	0.846675	0.0344556	-0.936774	-0.165295	-0.409505	0.00961507	-1.44165	1.18816	-3.97904	0.785273	-2.32851	-3.36201	-1.83867	-0.422574	-1.72346	-0.639358
cg00570518	3.3005	2.97982	4.00882	-0.431638	-2.78151	-1.00883	-0.547116	0.13061	0.107189	-0.668051	-0.31597	-0.587742	-0.0921578	0.622731	1.12181	0.312582	-0.49555	-0.724917	-2.2006	2.00915	-0.179378	0.757439	-1.22451	0.538962	1.72703	2.50467	-0.823622	-1.22521	5.78372	0.704494	3.28421	1.37835	-0.571584	1.49866	-0.207472	-1.69167	1.33125	0.00682544	0.376222	-1.22448	0.535076	-2.74999	0.146498	-0.168369	-3.40444	-2.17764	0.219484	-0.962205	-0.5276
cg19642877	2.48855	6.78866	5.34155	-1.07889	-2.00938	-0.59877	-0.962471	1.03187	-0.366641	0.0252938	-0.832717	-1.26312	-0.708245	-0.785016	-0.86137	0.152633	-1.58039	-2.04873	-1.47686	0.793666	-0.14277	-0.953617	-0.417686	1.13186	-1.29872	1.99514	-0.294977	-0.53472	-4.04221	3.72386	6.21263	1.15505	0.540453	-1.52442	-0.600956	-1.36505	-3.44612	2.99071	-1.51728	-1.56765	-0.111846	-4.77498	0.58872	1.90114	-4.12287	-5.14701	3.11061	-1.24057	-0.208657
cg27119222	0.297345	1.18546	-0.543266	-8.54677	-7.70741	-6.9377	-8.59087	-7.80731	-7.98244	-2.93946	-5.35678	-6.41077	-5.70156	-4.86086	-6.94024	-7.73442	-7.98141	-8.47559	-7.53046	-8.72218	-6.67067	-8.20557	-8.65517	-8.25208	-7.07517	-5.02578	-9.19328	-7.64927	-6.03789	-8.41666	-4.27705	-1.80403	-7.75875	-8.33833	-8.04779	-8.4914	-7.70034	-6.00552	-5.23955	-3.643	-6.1113	-3.38498	-8.44563	-6.68059	-5.06754	-7.61599	-7.38245	-8.27465	-8.07986
cg11297256	-1.98228	-0.647449	-1.95924	-10.8436	-6.61054	-5.4499	-11.07	-8.89141	-9.47762	-2.90691	-7.6005	-8.24364	-4.28194	-6.74186	-9.17968	-8.41809	-10.5718	-10.0935	-7.90911	-10.6125	-5.6753	-9.61877	-10.1358	-10.128	-9.99775	-1.06582	-10.5975	-7.81837	-8.48107	-10.0551	-4.76659	-2.202	-9.4968	-10.0362	-8.42653	-9.90115	-10.8438	-8.67708	-5.11038	-6.85232	-9.58057	-0.365941	-9.85503	-9.1272	-5.22769	-10.9933	-7.01275	-9.48062	-9.73433
cg14392746	0.661005	0.395885	0.0835659	-5.3799	-4.48368	-3.08157	-5.3333	-4.61333	-4.70592	-2.06706	-2.79785	-3.64108	-1.74961	-3.74843	-4.80607	-4.10057	-5.14565	-4.95129	-4.81536	-5.07799	-3.68922	-5.02595	-4.8047	-4.39139	-4.62142	-1.00165	-5.32888	-4.01288	-5.19732	-4.3804	-1.48241	-1.20721	-3.60315	-5.00817	-4.42046	-4.993	-5.08391	-1.96547	-2.5096	-5.04362	-4.80875	-1.56892	-4.80978	-2.03054	-3.35958	-4.94866	-3.81034	-5.11306	-4.93763
cg12077660	1.85839	-0.229664	0.91521	-14.0876	-3.27544	-5.76655	-13.8427	-8.35503	-8.62034	-0.573616	-3.14836	-5.69812	-1.56245	-3.10103	-7.82998	-3.52109	-14.9602	-11.3089	-3.42607	-13.294	-2.97379	-11.3925	-11.4841	-8.57974	-5.48822	-0.617436	-15.4266	-4.64837	-3.35063	-5.048	-1.34501	-0.312283	-7.11043	-15.0598	-5.09352	-10.2848	-11.6577	-0.92996	-3.48735	-15.224	-6.58932	-0.144677	-12.7079	-10.7301	-5.08412	-15.4596	-5.09518	-10.8163	-8.74058
cg03401726	0.0994028	0.379707	0.147814	-6.22004	-2.63472	-2.39573	-5.97256	-4.44972	-3.91418	-0.911361	-1.96026	-2.83028	-1.00396	-2.06472	-3.84225	-1.6501	-6.47072	-5.11291	-1.72825	-6.1083	-1.70053	-5.46268	-5.82728	-3.80379	-2.95337	-0.632509	-6.51074	-2.97401	-1.91249	-2.28432	-0.738515	-0.739194	-3.54733	-6.38724	-2.69	-5.0951	-5.61577	-0.791448	-1.88595	-6.50771	-3.34199	-0.117713	-5.84022	-5.37296	-1.69236	-6.48414	-3.16745	-5.06219	-4.75304
cg16739686	0.405099	0.322289	0.393833	-7.48289	-6.82959	-5.26314	-7.55526	-6.91918	-6.5943	-2.61968	-4.64795	-5.30452	-2.29413	-5.0176	-6.99713	-6.31222	-7.54421	-7.34867	-7.22163	-7.35512	-5.47898	-6.89716	-6.85118	-7.27366	-5.39035	-2.4649	-7.53098	-6.57048	-7.47007	-5.99416	-1.86572	-1.60107	-5.88272	-7.25157	-6.73917	-7.39404	-7.39607	-3.06713	-3.23249	-7.28873	-6.4681	-2.14581	-7.00339	-3.92603	-2.36464	-7.5538	-6.55205	-7.37162	-7.46491
cg08359167	-0.84028	-0.311251	0.357802	-12.3789	-5.46355	-5.36676	-11.771	-9.28507	-9.56821	-2.47504	-4.03411	-6.31946	-2.60067	-4.17156	-8.67025	-5.39149	-12.5419	-10.8673	-4.97837	-11.3571	-4.17406	-10.6592	-10.4217	-8.80419	-8.22577	-0.760856	-12.5475	-5.74747	-5.93132	-6.43232	-3.0578	-1.99033	-8.44211	-11.6118	-6.57415	-10.6804	-11.9285	-1.35279	-4.63081	-11.8254	-6.7126	-1.15712	-11.2189	-11.2198	-2.95831	-12.6404	-5.91502	-10.1481	-9.2475
cg08446215	0.222678	-0.271671	-0.0673868	-8.92407	-7.9296	-5.44063	-9.03612	-8.20102	-8.09969	-3.2436	-5.08509	-6.67002	-2.97525	-5.76561	-8.61872	-7.18696	-9.00027	-8.80133	-8.51115	-8.81844	-6.36639	-8.76718	-8.61345	-8.28685	-7.58361	-3.12358	-8.9527	-7.49596	-8.76537	-7.17528	-2.13372	-2.34835	-7.47416	-8.90424	-7.81843	-8.92031	-8.77984	-4.61084	-3.77083	-8.39491	-8.32201	-2.89405	-8.73163	-4.89223	-3.43493	-9.00129	-7.26738	-8.86728	-8.96659
cg26104781	-0.273707	-0.546574	-0.0431956	-8.00716	-7.09637	-6.22552	-8.10928	-7.77331	-7.43544	-2.8477	-4.64069	-5.92141	-3.55159	-5.58396	-7.37189	-7.13461	-8.11955	-7.88997	-7.67504	-7.87291	-6.23662	-7.49653	-7.16329	-7.72967	-6.3894	-2.69772	-8.07119	-6.65956	-7.88102	-6.96202	-2.20085	-1.90815	-6.87045	-7.85938	-7.06156	-8.02343	-7.96819	-3.6155	-4.04168	-7.53545	-7.42169	-3.17399	-7.64548	-4.6753	-2.73947	-8.02099	-6.52813	-7.98552	-8.08252
cg02219360	-0.582192	0.0288866	-0.0119938	-5.69069	-5.47238	-4.44336	-5.63993	-5.36383	-5.42625	-2.68389	-3.25563	-2.36576	-2.31592	-4.03834	-5.37141	-4.30652	-5.71708	-5.66615	-5.43469	-5.60532	-4.36756	-5.45353	-5.41579	-5.48682	-4.87265	-1.96035	-5.63393	-4.76892	-5.5285	-5.3849	-2.08102	-1.6885	-5.08819	-5.62344	-5.08983	-5.60255	-5.63029	-1.22346	-3.64011	-5.17071	-5.44811	-2.94652	-4.96609	-3.94271	-4.3792	-5.64188	-4.66719	-5.60601	-5.64868
[truncated: 343 more rows]
[truncated: 93 more columns]
