# Supplementary material for: Investigation of Multilocus Imprinting Disturbance (MLID) in 101 Beckwith-Wiedemann Spectrum patients
Source: Research Square preprint supplement (doi:10.21203/rs.3.rs-6555801/v1), 2025-05-07
Supplement: Supplementary file 2 [file 0d30e20499a5c1a201a4aa7a.xlsx]

## Sheet: Table S2
Table S2: MS-MLPA results of the 16 BWS patients with MLID. LOM, Loss of methylation; GOM, Gain of methylation; N/E, Not Evaluated.
DMR	H19-1 [1]	H19-1 [2]	H19-1 [3]	MEG3-1	MEG3-1a	PLAGL1-2 [1]	PLAGL1-2 [2]	GRB10-Intr.1 [1]	GRB10-Intr.1 [2]	MEST-1 [1]	MEST-1 [2]	KCNQ1OT1-1-IC [1]	KCNQ1OT1-1-IC [2]	MEG8-6	MEG8-Intr 5	SNRPN-Intr.2 [1]	SNRPN-Intr.2 [2]	PEG3-1 [1]	PEG3-1 [2]	PEG3-1 [3]	GNAS-AS1-1	GNASXL-1 [1]	GNASXL-1 [2]	GNAS A/B-1	GNAS-NESP55-1
Chromosomal coordinates (hg18)	11-001,975970	11-001,976110	11-001,976280	14-100,361810	14-100,362090	06-144,370610	06-144,370970	07-050,818010	07-050,818250	07-129,918600	07-129,919380	11-002,677130	11-002,677610	14-100,440560	14-100,440680	15-022,751230	15-022,752250	19-062,041790	19-062,043520	19-062,044040	20-056,859420	20-056,863530	20-056,863600	20-056,897780	20-056,848340
Patient 81	-	-	-	-	-	-	-	-	-	-	-	LOM	LOM	-	-	-	-	-	-	-	-	LOM	LOM	LOM	-
Patient 77	-	-	-	-	-	LOM	LOM	-	-	-	-	LOM	LOM	-	-	-	-	-	-	-	-	-	-	-	-
Patient 84	-	-	-	-	-	-	-	-	-	-	-	LOM	LOM	-	-	-	-	-	-	-	LOM	LOM	LOM	LOM	-
Patient 86	-	-	-	-	-	-	-	-	-	-	-	LOM	LOM	-	-	-	-	-	-	-	LOM	LOM	LOM	LOM	-
Patient 87	-	-	-	-	-	-	-	-	-	LOM	LOM	LOM	LOM	-	-	-	-	-	-	-	-	-	-	-	-
Patient 88	-	-	-	-	-	-	-	-	-	LOM	LOM	LOM	LOM	-	-	-	-	-	-	-	-	-	-	-	-
Patient 73	-	-	-	-	-	-	-	LOM	LOM	LOM	LOM	LOM	LOM	-	-	LOM	LOM	LOM	LOM	LOM	LOM	LOM	LOM	LOM	-
Patient 74	-	-	-	-	-	LOM	LOM	-	-	-	-	LOM	LOM	-	-	-	-	-	-	-	LOM	LOM	LOM	N/E	-
Patient 75	-	-	-	-	-	-	-	-	-	LOM	LOM	LOM	LOM	-	-	-	-	-	-	-	LOM	LOM	LOM	LOM	GOM
Patient 76	-	-	-	-	-	-	-	LOM	LOM	LOM	LOM	LOM	LOM	-	-	-	-	-	-	-	-	-	-	-	-
Patient 78	-	-	-	-	-	LOM	LOM	-	-	-	-	LOM	LOM	-	-	-	-	-	-	-	-	-	-	-	-
Patient 79	-	-	-	-	-	LOM	LOM	-	-	-	-	LOM	LOM	-	-	-	-	-	-	-	-	-	-	-	-
Patient 80	-	-	-	-	-	LOM	LOM	-	-	-	-	LOM	LOM	-	-	-	-	-	-	-	-	-	-	-	-
Patient 82	-	-	-	-	-	-	-	LOM	LOM	LOM	LOM	LOM	LOM	-	-	-	-	-	-	-	-	-	-	-	-
Patient 83	-	-	-	-	-	-	-	-	-	LOM	LOM	LOM	LOM	-	-	-	-	-	-	-	-	-	-	-	-
Patient 85	-	-	-	-	-	-	-	-	-	-	-	LOM	LOM	-	-	-	-	-	-	-	-	LOM	LOM	LOM	-
Total	0	0	0	0	0	5	5	3	3	7	7	16	16	0	0	1	1	1	1	1	5	7	7	6	1
%	0	0	0	0	0	31.25	31.25	18.75	18.75	43.75	43.75	100	100	0	0	6.25	6.25	6.25	6.25	6.25	31.25	43.75	43.75	37.5	6.25
