# Supplementary material for: Investigation of Multilocus Imprinting Disturbance (MLID) in 101 Beckwith-Wiedemann Spectrum patients
Source: Research Square preprint supplement (doi:10.21203/rs.3.rs-6555801/v1), 2025-05-07
Supplement: Supplementary file 3 [file 0ff751765538bef23c69c2bd.docx]

**Table S4:** Statistical Comparison of Clinical Features Between Patients with Isolated BWS and BWS-MLID

| **Significant association among categorical variables BWS vs BWS-MLID** | **Freq**  **BWS***  **yes/not(%)** | **Freq**  **MLID**  **yes/not(%)** | **Chi square value** | **df** | **Pvalue**  **Chi square test** | **Pvalue**  **Fisher´s exact test** | **Interpretation** | **Comments** |
| --- | --- | --- | --- | --- | --- | --- | --- | --- |
| *Umbilical hernia* | 139/93 (59.92) | 14/31  (31.11) | 11.51 | 1 | 0.0007 | - | Statistically significant association between the conditions (p < 0.05) | This suggests that the frequency of umbilical hernia is slightly higher in BWS vs MLID. |
| *Organomegaly* | 133/51  (72.28) | 2/43  (4.44) | 65.99 | 1 | 4.54×10−16 | Odds ratio: 56.07  P-Value: 8.44×10−18 | Statistically significant association between the conditions (p < 0.001) | The odds ratio of 56.07 indicates that organomegaly is much more frequent in BWS than in MLID, with a statistically robust difference. |
| *Posterior/anterior ear pits* | 263/131  (66.75) | 10/35  (22.22) | 32.19 | 1 | 1.4×10−8 | - | Statistically significant association between the conditions (p < 0.001) | This suggests that this feature is much more frequent in BWS compared to MLID, with a statistically very robust difference. |
| *Inguinal hernia* | 22/15  (59.45) | 5/40  (11.11) | 19.36 | 1 | 1.08×10−5 | - | Statistically significant association between the conditions (p < 0.001) | This suggests that the frequency of inguinal hernia is significantly higher in BWS compared to MLID. |
| *Diastasis recti* | 42/16  (72.41) | 4/41  (8.88) | 38.84 | 1 | 4.59×10−10 | Odds ratio: 26.91  P-Value: 3.32×10−11 | Statistically significant association between the conditions (p < 0.001) | The odds ratio of 26.91 suggests that diastasis recti is much more frequent in BWS compared to MLID, with a statistically very robust difference. |
| *Nevus* | 190/70  (73.76) | 6/39  (13.33) | 57.05 | 1 | 4.26×10−14 | - | Statistically significant association between the conditions (p < 0.001) | This suggests that the frequency of nevus is much higher in BWS compared to MLID, with a statistically very robust difference. |
| *Congenital heart disease* | 50/40  (55.55) | 1/44  (2.22) | 34.07 | 1 | 5.32×10−9 | Odds ratio: 55  P-Value: 6.63×10−11 | Statistically significant association between the conditions (p < 0.001) | The odds ratio of 55.00 suggests that congenital heart disease is much more frequent in BWS compared to MLID, with a statistically robust difference. |
| *Omphalocele* | 173/74  (70.04) | 10/35  (22.22) | 35.19 | 1 | 2.99×10−9 | - | Statistically significant association between the conditions (p < 0.001) | This suggests that the frequency of omphalocele is significantly higher in BWS compared to MLID, with a statistically robust difference. |
| *Hypoglycemia* | 201/121  (62.42) | 18/27  (40.0) | 7.34 | 1 | 0.0067 | - | Statistically significant association between the conditions (p < 0.05)between the conditions (p < 0.05) | The frequency of hypoglycemia is significantly higher in BWS compared to MLID, with a statistically difference. |
| *Macroglossia* | 408/157  (72.21) | 40/5  (88.89) | 5.12 | 1 | 0.024 | - | Statistically significant association between the conditions (p < 0.05) | The frequency macroglossia is slightly higher in MLID compared to BWS, with a statistically difference. |
| *Hemihyperplasia* | 171/277  (38.17) | 18/27  (37.78) | <0.0001 | 1 | 1.0 | - | NO Statistically significant association between the conditions (p >0.05) | This suggests that the distribution of hemihyperplasia is similar in both situations (MLID and BWS). |
| *Macrosomia* | 269/149  (64.35) | 18/27  (40.0) | 9.22 | 1 | 0.0024 | - | Statistically significant association between the conditions (p < 0.05) | This suggests that the frequency of macrosomia is slightly higher in BWS compared to MLID, with a statistically difference. |
| *Prognathism* | 50/24  (67.57) | 1/44  (2.22) | 46.16 | 1 | 1.09×10−11 | Odds ratio: 91.67  P-Value: 6.77×10−14 | Statistically significant association between the conditions (p < 0.001) | This suggests that prognathism is significantly more frequent in BWS compared to MLID, with a statistically robust difference. Additionally, the odds ratio of 91.67 suggests that prognathism is much more frequent in BWS compared to MLID, with a statistically robust difference. |

*Although the association is statistically significant, it is important to consider the sample size (45 cases). A larger sample would be ideal to confirm these findings.
