# Supplementary material for: Investigation of Multilocus Imprinting Disturbance (MLID) in 101 Beckwith-Wiedemann Spectrum patients
Source: Research Square preprint supplement (doi:10.21203/rs.3.rs-6555801/v1), 2025-05-07
Supplement: Supplementary file 4 [file 3086daaaad43246832684a9c.xlsx]

## Sheet: SampleSheet_BWStotal
Table S1: Summary of Patients IDs and Corresponding BWS Alterations. LOM, Loss of methylation; GOM, Gain of methylation; ICR1 imprinting control region 1; ICR2, imprinting control region 2; UPD, uniparental disomy. Patients 14, 53, 54, 73, 75, 76, 77 and 78 were previously reported in Court et al, (2013) (PMID: 23335487)
Patient ID	BWS type
Patient 1	LOM ICR2
Patient 2	LOM ICR2
Patient 3	LOM ICR2
Patient 4	LOM ICR2
Patient 5	LOM ICR2
Patient 6	LOM ICR2
Patient 7	LOM ICR2
Patient 8	LOM ICR2
Patient 9	LOM ICR2
Patient 10	LOM ICR2
Patient 11	LOM ICR2
Patient 12	LOM ICR2
Patient 13	LOM ICR2
Patient 14	LOM ICR2
Patient 15	LOM ICR2
Patient 16	LOM ICR2
Patient 17	LOM ICR2
Patient 18	LOM ICR2
Patient 19	LOM ICR2
Patient 20	LOM ICR2
Patient 21	LOM ICR2
Patient 22	LOM ICR2
Patient 23	LOM ICR2
Patient 24	LOM ICR2
Patient 25	LOM ICR2
Patient 26	LOM ICR2
Patient 27	LOM ICR2
Patient 28	LOM ICR2
Patient 29	LOM ICR2
Patient 30	LOM ICR2
Patient 31	LOM ICR2
Patient 32	LOM ICR2
Patient 33	LOM ICR2
Patient 34	LOM ICR2
Patient 35	LOM ICR2
Patient 36	LOM ICR2
Patient 37	LOM ICR2
Patient 38	LOM ICR2
Patient 39	LOM ICR2
Patient 40	LOM ICR2
Patient 41	LOM ICR2
Patient 42	LOM ICR2
Patient 43	LOM ICR2
Patient 44	LOM ICR2
Patient 45	LOM ICR2
Patient 46	LOM ICR2
Patient 47	LOM ICR2
Patient 48	LOM ICR2
Patient 49	LOM ICR2
Patient 50	LOM ICR2
Patient 51	LOM ICR2
Patient 52	LOM ICR2
Patient 53	LOM ICR2
Patient 54	LOM ICR2
Patient 55	LOM ICR2
Patient 56	LOM ICR2
Patient 57	LOM ICR2
Patient 58	LOM ICR2
Patient 59	LOM ICR2
Patient 60	LOM ICR2
Patient 61	LOM ICR2
Patient 62	LOM ICR2
Patient 63	LOM ICR2
Patient 64	LOM ICR2
Patient 65	LOM ICR2
Patient 66	LOM ICR2
Patient 67	LOM ICR2
Patient 68	LOM ICR2
Patient 69	LOM ICR2
Patient 70	GOM ICR1
Patient 71	GOM ICR1
Patient 72	GOM ICR1
Patient 73	LOM ICR2
Patient 74	LOM ICR2
Patient 75	LOM ICR2
Patient 76	LOM ICR2
Patient 77	LOM ICR2
Patient 78	LOM ICR2
Patient 79	LOM ICR2
Patient 80	LOM ICR2
Patient 81	LOM ICR2
Patient 82	LOM ICR2
Patient 83	LOM ICR2
Patient 84	LOM ICR2
Patient 85	LOM ICR2
Patient 86	LOM ICR2
Patient 87	LOM ICR2
Patient 88	LOM ICR2
Patient 89	UPD
Patient 90	UPD
Patient 91	UPD
Patient 92	UPD
Patient 93	UPD
Patient 94	UPD
Patient 95	UPD
Patient 96	UPD
Patient 97	UPD
Patient 98	UPD
Patient 99	UPD
Patient 100	UPD
Patient 101	UPD
