# Supplementary material for: Investigation of Multilocus Imprinting Disturbance (MLID) in 101 Beckwith-Wiedemann Spectrum patients
Source: Research Square preprint supplement (doi:10.21203/rs.3.rs-6555801/v1), 2025-05-07
Supplement: Supplementary file 5 [file b2c76a0976907f8f8057341b.xlsx]

## Sheet: gDMRs
Table 1: Clinical features and abnormally methylated DMRs in patients with Beckwith-Wiedemann Syndrome from this study. Abbreviations: F, female; M, male; N/E, not evaluated; N, normal; IVF, in vitro fertilisation; AI, artificial insemination.
Patient	Age	Sex	Conception	Clinical features	DMRs
1	27	F	N/E	macroglossia, omphalocele	KCNQ1OT1, DIRAS3
3	25	M	N/E	macroglossia, umbilical hernia, attention-deficit/hyperactivity disorder, delayed speech and language development	KCNQ1OT1, ERLIN2
5	17	F	N	omphalocele, macroglossia, feeding difficulties, brachycephaly, nevus, short neck, hypoplastic nipples, supernumerary nipple, umbilical hernia	KCNQ1OT1, L3MBTL1, ZDBF2
8	19	M	N	macroglossia, anterior earlobe creases, round face, umbilical hernia	KCNQ1OT1, MKRN3
10	30	M	N/E	omphalocele, cryptorchidism, inguinal hernia, bilateral renal nephrocalcinosis	KCNQ1OT1, NAP1L5
14	19	M	N	macroglossia, macrosomia, neonatal hypoglycemia, hemihyperplasia, diastasis recti, umbilical hernia, hypotonia, mild intellectual disability, nevus, furrowed tongue	KCNQ1OT1, DIRAS3
15	29	M	N/E	macroglossia, neonatal hypoglycemia, umbilical hernia	KCNQ1OT1, PPIEL, SNU13
19	19	M	N	macroglossia, macrosomia, round face	KCNQ1OT1, SNU13
29	10	M	N	macroglossia, hypospadias, dlobal developmental delay, neonatal hypoglycemia, diastasis recti, umbilical hernia, heaptomegaly, supernumerary nipple	KCNQ1OT1, L3MBTL1, NAP1L5
31	10	M	N	macroglossia, facial hemyhiperplaisa, neonatal hypoglycemia,	KCNQ1OT1, NNAT
32	41	F	N	macroglossia, omphalocele, macrosomia, anterior earlobe creases	KCNQ1OT1, HTR5A
33	6	F	IVF	macroglossia, facial hemyhiperplaisa, visceromegaly, coarse facial features	KCNQ1OT1, MEST, SNRPN, PEG3, ERLIN2
34	5	M	N	macroglossia, omphalocele	KCNQ1OT1, MEST, PEG3, HTR5A
36	13	F	N/E	macroglossia, neonatal hypoglycemia, umbilical hernia	KCNQ1OT1, IGF2R
39	4	F	N	hemihyperplasia, macrocephaly, seizures, macroglossia, short neck, macrosomia, autism, hypotonia, hypocalcemia, hyperphosphatemia, hepatomegaly, umbilical hernia, hamartoma	KCNQ1OT1, GNAS, NESP55, PEG3
43	15	F	N/E	macroglossia, neonatal hypoglycemia	KCNQ1OT1, IGF2R
51	18	F	N/E	omphalocele, macroglossia, neonatal hypoglycmeia, anteriror earlobe creases	KCNQ1OT1, FAM50B, PLAGL1,
52	18	M	IVF	macroglossia, hemihyperplasia, umbilical hernia, neonatal hypoglycemia	KCNQ1OT1, DIRAS3, ZDBF2, WRB
53	16	F	N/E	macrcephaly, macrosomia, hypotonia, strabismus, global developmental delay, angioma	KCNQ1OT1, GNAS, NESP55, NAP1L5, NNAT
54	18	F	IVF	macroglossia, hemihyperplaisa	KCNQ1OT1, L3MBTL1, ZDBF2, RB1
55	18	F	IVF	macroglossia, hemihyperplaisa	KCNQ1OT1, L3MBTL1, ZDBF2, RB1
57	17	M	N/E	macroglossia, hemihyperplasia	KCNQ1OT1, DIRAS3
58	19	F	N/E	macroglossia, diastasis recti, umbilical hernia, nevus, neonatal hypoglycemia	KCNQ1OT1, FAM50B, ZDBF2, SNU13
62	19	F	N	macroglossia, macrosomia, hypotonia, macrostomia, strabismus	KCNQ1OT1, FAM50B, WRB
70	49	M	N	macroglossia, anterior earlobe creases	KCNQ1OT1, DIRAS3, ZNF597
73	16	F	N	macroglossia, hemihyperplasia, neonatal hypoglycemia, macrosomia, nephromegaly, angioma, posterior helix pits	KCNQ1OT1, MEST, PLAGL1, DIRAS3, GNAS, NESP55, L3MBTL1, ZNF331, PEG3, GRB10, SNRPN, ZDBF2, NAP1L5, ZNF597
74	19	F	AI	macroglossia, hemihyperplasia, umbilical hernia, macrosomia, neonatal hypoglycemia	KCNQ1OT1, DIRAS3, GNAS, PLAGL1, FAM50B, WRB, MKRN3, SNU13, IGF2R
75	16	F	N	macroglossia, macrosomia, round face, madibular prognathia, hemangioma, omphalocele, nevus, anterior earlobe creases	KCNQ1OT1, MEST, DIRAS3, GNAS, NESP55, L3MBTL1, FAM50B, PPIEL, PEG10, WRB, MKRN3
76	16	F	N	macroglossia, omphalocele, coarse facial features	KCNQ1OT1, MEST, FAM50B, L3MBTL1, ZNF331, GRB10, WRB, NNAT, IGF2R
77	20	M	IVF	macroglossia, hemihyperplasia, macrosmia, neonatal hypoglycemia,	KCNQ1OT1, PLAGL1
78	19	M	IVF	Hemihyperplasia, macrosomia, neonatal hypoglycemia, nevus, macroglossia, inguinal hernia	KCNQ1OT1, PLAGL1, L3MBTL1, DIRAS3, ZDBF2, SNU13
79	19	M	N	macroglossia, macrosomia, hemihyperplasia, diastasis recti, umbilical hernia, pectus excavatum, furrowed tongue, clinodactyly, inverted mammae, posterior helix pits	KCNQ1OT1, FAM50B, PLAGL1, DIRAS3, NAP1L5, MCTS2, ERLIN2, NNAT, SNU13
80	11	F	N	hemihyperplasia, macrosomia, macroglossia, vascular malformation	KCNQ1OT1, FAM50B, PLAGL1,
81	25	F	N	neonatal hypoglycemia, macroglossia,	KCNQ1OT1, GNAS, DIRAS3, FAM50B, L3MBTL1, ZNF331, ZDBF2, WRB, ERLIN2, SNU13, IGF2R
82	6	M	N	inguinal hernia, hypotonia, cryptorchidism, macroglossia, macrosomia, anterior earlobe creases	KCNQ1OT1, MEST, DIRAS3, GRB10, PPIEL, ZDBF2, NAP1L5, ZNF597, RB1, WRB, ERLIN2
83	7	M	N	hemihyperplasia, macroglossia	KCNQ1OT1, MEST, PEG3, NAP1L5, MEG8
84	20	F	N/E	obesity, severe atopic dermatitis, hypothyroidism, hemihyperplasia, enlarged pituitary gland	KCNQ1OT1, GNAS, FAM50B, MKRN3
85	10	F	N/E	hemihyperplasia, macroglossia, umbilical hernia	KCNQ1OT1, GNAS, DIRAS3, IGF2R
86	24	M	IVF	macroglossia, omphalocele, hypotonia, macrocephaly, scoliosis, neonatal hypoglycemia	KCNQ1OT1*, GNAS, NESP55
87	19	F	N	macroglossia, macrosomia	KCNQ1OT1, MEST, FAM50B, DIRAS3, ZDBF2, WRB, SNU13
88	17	M	N	macroglossia, macrosomia, neonatal hypoglycemia, diastasis recti, open mouth, high palate, anterverted nares	KCNQ1OT1, MEST
90	15	M	N	macrosomia, neonatal hypoglycemia, macrocephaly, anterior earlobe creases, diastasis recti, hypotonia, nevus	KCNQ1OT1, MKRN3
91	19	M	N/E	macroglossia, omphalocele	KCNQ1OT1, NAP1L5
94	19	M	N/E	macroglossia	KCNQ1OT1, FAM50B
98	18	M	N	macroglossia, hemihyperplasia, round face, anterior earlobe creases, umbilical hernia, inguinal hernia, neonatal hypoglycemia	KCNQ1OT1, DIRAS3
