# Supplementary material for: Investigation of Multilocus Imprinting Disturbance (MLID) in 101 Beckwith-Wiedemann Spectrum patients
Source: Research Square preprint supplement (doi:10.21203/rs.3.rs-6555801/v1), 2025-05-07
Supplement: Supplementary file 6 [file bf8acab082e1a8c8f340c23e.docx]

**Legends for supplementary tables:**

**Legends for Supplementary Tables**

**Table S1.** Summary of patient IDs and corresponding BWS alterations.
LOM: Loss of methylation; GOM: Gain of methylation; ICR1: Imprinting Control Region 1; ICR2: Imprinting Control Region 2; UPD: Uniparental disomy. Patients 14, 53, 54, 73, 75, 76, 77, and 78 were previously reported in Court et al. (2013) (PMID: 23335487).

**Table S2.** MS-MLPA results for the 16 BWS patients with MLID.
LOM: Loss of methylation; GOM: Gain of methylation; N/E: Not evaluated.

**Table S3**. Z-scores for the probes located within the DMRs previously reported by Tayama et al. (2014). Probes showing hypermethylation (> +3 SD) are highlighted in red, while those showing hypomethylation (< –3 SD) are highlighted in blue.

**Table S4**. Statistical comparison of clinical features between patients with isolated BWS and those with BWS-MLID.

**Legends for supplementary figures:**

**Figures S1A–D**. Heatmaps of methylation levels across DMRs showing abnormal methylation in 101 BWS patients and 41 controls, identified using methylation arrays.
All panels display methylation values for *KCNQ1OT1*. Heatmaps were generated in R using the ComplexHeatmap package (v2.20.0). Controls are represented by grey squares, isolated BWS cases by orange squares, and BWS-MLID cases by brown squares.

**Figures S2A–C.** Heatmaps of methylation levels across additional regions showing abnormal methylation in 101 BWS patients and 41 controls, identified using methylation arrays.
All panels display methylation values for *KCNQ1OT1*. Heatmaps were generated in R using the ComplexHeatmap package (v2.20.0). Controls are represented by grey squares, isolated BWS cases by orange squares, and BWS-MLID cases by brown squares.
